# Supplementary material for: Polo-like kinase-dependent phosphorylation of the synaptonemal complex protein SYP-4 regulates double-strand break formation through a negative feedback loop
Source: eLife. 2017 Mar 27;6:e23437. doi: 10.7554/eLife.23437 (PMC5423773; doi:10.7554/eLife.23437)
Supplement: Figure 4—source data 1. — DOI: http://dx.doi.org/10.7554/eLife.23437.012 [file elife-23437-fig4-data1.xlsx]

## Sheet: Sheet1
		Wild type_Fish signal for Chromsome V						Wild type_HIM-8 signal for X Chromsome
	Paired	Unpaired	Total no. of nuclei	% of paired signal			Paired	Unpaired	Total no. of nuclei	% of paired signal
Zone 1	26	252	278	9.35		Zone 1	19	278	297	6.39
Zone 2	85	55	140	60.7		Zone 2	151	9	160	94
Zone 3	160	7	167	95.8		Zone 3	171	0	171	100
Zone 4	147	11	158	93		Zone 4	175	0	175	100
Zone 5	149	4	153	97.3		Zone 5	155	0	155	100
Zone 6	143	8	151	94.7		Zone 6	122	2	124	98.3
		syp-1(S269A)_Fish signal_ Chromsome V						syp-1(S269A)_HIM-8 signal_ X Chromsome
	Paired	Unpaired	Total no. of nuclei	% of paired signal			Paired	Unpaired	Total no. of nuclei	% of paired signal
Zone 1	20	219	239	8.3		Zone 1	13	234	247	5.26
Zone 2	78	61	139	56		Zone 2	146	6	152	96
Zone 3	146	6	152	96		Zone 3	149	0	149	100
Zone 4	144	3	147	98		Zone 4	157	0	157	100
Zone 5	134	3	137	97.8		Zone 5	154	0	154	100
Zone 6	137	6	143	95.8		Zone 6	139	4	143	97
		syp-1(S269D)_Fish signal_ Chromsome V						syp-1(S269D)_HIM-8 signal_ X Chromsome
	Paired	Unpaired	Total no. of nuclei	% of paired signal			Paired	Unpaired	Total no. of nuclei	% of paired signal
Zone 1	22	235	257	8.56		Zone 1	15	245	260	5.7
Zone 2	84	48	132	63.6		Zone 2	141	6	147	96
Zone 3	148	11	159	93		Zone 3	144	0	144	100
Zone 4	130	3	133	97.7		Zone 4	149	0	149	100
Zone 5	134	5	139	96		Zone 5	150	0	150	100
Zone 6	129	4	133	96.9		Zone 6	134	0	134	100
						Zone 1	Zone 2	Zone 3	Zone 4	Zone 5	Zone 6
					Wild type_FISH signal_Chromosome V	278	140	167	158	153	151
					syp-4(S269A)_FISH signal_Chromosome V	239	139	152	147	137	143
					syp-4(S269D)_FISH signal_Chromosome V	257	132	159	133	139	133
					Wild type_HIM-8 staining	297	160	171	175	155	124
					syp-4(S269A)_HIM-8 staining	247	152	149	157	154	143
					syp-4(S269D)_HIM-8 staining	260	147	144	149	150	134
					Average of number of nuclei scored	263	145	157	153	148	138
					for each zone
