# Supplementary material for: Polo-like kinase-dependent phosphorylation of the synaptonemal complex protein SYP-4 regulates double-strand break formation through a negative feedback loop
Source: eLife. 2017 Mar 27;6:e23437. doi: 10.7554/eLife.23437 (PMC5423773; doi:10.7554/eLife.23437)
Supplement: Figure 5—source data 1. — DOI: http://dx.doi.org/10.7554/eLife.23437.014 [file elife-23437-fig5-data1.xlsx]

## Sheet: Sheet1
		3 COSA-1::GFP foci/nucleus	4 COSA-1::GFP foci/nucleus	5 COSA-1::GFP foci/nucleus	6 COSA-1::GFP foci/nucleus	total no. of nuclei scored
	Wild type	0	0	0	1	186
	syp-4(S269A)	0	0	6	165	175
	syp-4(S269D)	1	0	2	188	190
