# Supplementary material for: Polo-like kinase-dependent phosphorylation of the synaptonemal complex protein SYP-4 regulates double-strand break formation through a negative feedback loop
Source: eLife. 2017 Mar 27;6:e23437. doi: 10.7554/eLife.23437 (PMC5423773; doi:10.7554/eLife.23437)
Supplement: Figure 5—source data 2. — DOI: http://dx.doi.org/10.7554/eLife.23437.015 [file elife-23437-fig5-data2.xlsx]

## Sheet: Sheet1
		Wild type	syp-4(S269A)	syp-4(S269D)	syp-1
		3	1	2	5
		2	2	2	8
		2	8	5	7
		1	6	3	12
		2	5	1	10
		2	3	5	6
		2	2	3	5
		1	3	2	7
		1	3	6	8
		1	5	1	12
		1	7	5	5
		1	6	6	4
		2	4	4	3
		1	4	0	9
		2	4	2	7
		1	3	1	6
		3	3	3	7
		1	4	4	8
		2	2	2	9
		1	1	3	10
		3	5	1	8
		0	3	1	7
		1	3	3	6
		2	3	4	3
		1	3	5	4
		2	5	3	15
		2	4	1	7
		2	5	8	12
		3	7	5	9
		1	8	5	10
		2	5	5	15
		2	6	2	8
		3	3	0	5
		1	5	1	12
		1	11	8	6
		5	5	0	9
		4	6	6	11
		1	3	5	8
		1	3	1	9
		3	9	6	7
		2	3	7
		3	3	0
		2	3	6
		1	9	0
		3	10	3
		1	2	4
		1	2	1
		2	2	0
		3	11	5
		3	4	4
		1	3	0
		2	4	1
		2	5	8
		1	4	0
		3	10	1
		2	4	4
			4	1
			2	7
			7	4
			4	2
			8	2
			4
			2
			4
			4
			13
			2
			5
			3
			2
			3
			4
	Mean	1.85714	4.55556	3.11475	7.975
	Standard Deviation	0.942503	2.53365	2.31731	2.90435
	no.	56	72	61	40
