# Supplementary material for: Polo-like kinase-dependent phosphorylation of the synaptonemal complex protein SYP-4 regulates double-strand break formation through a negative feedback loop
Source: eLife. 2017 Mar 27;6:e23437. doi: 10.7554/eLife.23437 (PMC5423773; doi:10.7554/eLife.23437)
Supplement: Figure 5—source data 3. — Sheet one shows all raw data while sheet two shows combined summaries. DOI: http://dx.doi.org/10.7554/eLife.23437.016 [file elife-23437-fig5-data3.xlsx]

## Sheet: Sheet1
		No. of RAD-51 foci/nucleus							No. of RAD-51 foci/nucleus							No. of RAD-51 foci/nucleus							No. of RAD-51 foci/nucleus							No. of RAD-51 foci/nucleus							No. of RAD-51 foci/nucleus
		Wild type							syp-4(S269A)							syp-4(S269D)							rad-54(RNAi)							syp-4(S269A) rad-54(RNAi)							syp-4(S269D) rad-54(RNAi)
Zone 1	Zone 2	Zone 3	Zone 4	Zone 5	Zone 6		Zone 1	Zone 2	Zone 3	Zone 4	Zone 5	Zone 6		Zone 1	Zone 2	Zone 3	Zone 4	Zone 5	Zone 6		Zone 1	Zone 2	Zone 3	Zone 4	Zone 5	Zone 6		Zone 1	Zone 2	Zone 3	Zone 4	Zone 5	Zone 6		Zone 1	Zone 2	Zone 3	Zone 4	Zone 5	Zone 6
0	0	0	0	0	0		0	0	0	2	2	0		0	0	0	0	0	0		0	0	0	4	7	7		0	0	0	4	7	28		0	0	0	4	7	7
0	0	0	0	0	0		0	0	0	2	2	0		0	0	0	0	0	0		0	0	0	5	7	7		0	0	0	5	7	33		0	0	0	4	7	7
0	0	0	0	0	0		0	0	0	2	2	0		0	0	0	0	0	0		0	0	0	5	8	8		0	0	0	6	7	45		0	0	0	5	7	8
0	0	0	0	0	0		0	0	0	2	2	0		0	0	0	0	0	0		0	0	0	5	8	8		0	0	0	7	8	45		0	0	0	6	7	12
0	0	0	0	0	0		0	0	0	2	2	0		0	0	0	0	0	0		0	0	0	6	8	8		0	0	0	8	12	46		0	0	0	6	7	13
0	0	0	0	0	0		0	0	0	2	2	0		0	0	0	0	0	0		0	0	0	6	8	8		0	0	0	8	25	47		0	0	0	6	7	13
0	0	0	0	1	0		0	0	0	2	2	0		0	0	0	0	0	0		0	0	0	6	9	8		0	0	0	8	27	48		0	0	0	7	8	13
0	0	0	0	1	0		0	0	0	2	2	0		0	0	0	0	0	0		0	0	0	7	9	8		0	0	0	8	28	48		0	0	0	7	8	14
0	0	0	0	1	0		0	0	0	2	2	0		0	0	0	0	0	0		0	0	0	7	10	11		0	0	0	8	35	50		0	0	0	7	8	14
0	0	0	0	1	0		0	0	0	2	2	0		0	0	0	0	0	0		0	0	0	7	10	12		0	0	0	8	36	55		0	0	0	7	8	14
0	0	0	0	1	0		0	0	0	2	2	0		0	0	0	0	0	0		0	0	0	7	11	18		0	0	0	8	37	50		0	0	0	8	8	14
0	0	0	0	1	0		0	0	0	2	2	0		0	0	0	0	0	0		0	0	0	7	12	19		0	0	0	9	39	51		0	0	0	8	8	14
0	0	0	0	1	0		0	0	0	2	2	0		0	0	0	0	0	0		0	0	0	7	12	20		0	0	0	9	40	51		0	0	0	8	8	14
0	0	0	0	1	0		0	0	0	2	2	0		0	0	0	0	0	0		0	0	0	8	13	21		0	0	0	9	41	52		0	0	0	8	8	14
0	0	0	0	1	0		0	0	0	2	2	0		0	0	0	0	0	0		0	0	0	8	13	21		0	0	0	9	44	53		0	0	0	8	8	14
0	0	0	0	1	0		0	0	0	2	2	0		0	0	0	0	0	0		0	0	0	8	13	24		0	0	0	10	45	55		0	0	0	8	9	14
0	0	0	0	1	0		0	0	0	2	2	0		0	0	0	0	0	0		0	0	0	8	14	24		0	0	0	11	45	55		0	0	0	9	9	15
0	0	0	0	1	0		0	0	0	2	2	0		0	0	0	0	0	0		0	0	0	8	15	25		0	0	0	12	37	56		0	0	0	9	9	15
0	0	0	0	1	0		0	0	0	2	2	0		0	0	0	0	0	0		0	0	0	8	16	26		0	0	0	13	36	57		0	0	0	9	9	15
0	0	0	0	1	0		0	0	0	2	3	0		0	0	0	0	0	0		0	0	0	8	16	27		0	0	0	13	36	60		0	0	0	9	9	15
0	0	0	1	1	0		0	0	0	2	3	0		0	0	0	0	0	0		0	0	0	9	17	27		0	0	0	14	37	61		0	0	0	9	9	15
0	0	0	1	1	0		0	0	0	2	3	0		0	0	0	0	0	0		0	0	0	9	18	28		0	0	0	18	37	63		0	0	0	9	10	15
0	0	0	1	1	0		0	0	0	2	3	0		0	0	0	0	0	0		0	0	0	9	18	29		0	0	0	19	38	63		0	0	0	10	10	16
0	0	0	1	1	0		0	0	0	2	3	0		0	0	0	0	0	0		0	0	0	9	20	29		0	0	0	21	38	64		0	0	0	10	10	16
0	0	0	1	1	0		0	0	0	2	3	0		0	0	0	0	0	0		0	0	0	9	20	29		0	0	0	21	41	69		0	0	0	1	11	16
0	0	0	1	1	0		0	0	0	2	3	0		0	0	0	0	0	0		0	0	0	9	21	30		0	0	0	22	44	66		0	0	0	1	11	16
0	0	0	1	1	0		0	0	0	2	3	0		0	0	0	0	0	0		0	0	0	9	22	31		0	0	0	25	45	66		0	0	0	1	12	17
0	0	0	1	1	0		0	0	0	2	3	0		0	0	0	0	0	0		0	0	0	9	25	32		0	0	0	26	45	67		0	0	0	7	13	17
0	0	0	1	1	0		0	0	0	2	3	0		0	0	0	0	0	0		0	0	0	9	25	33		0	0	0	27	50	67		0	0	0	7	13	17
0	0	0	1	1	0		0	0	0	2	3	0		0	0	0	0	0	0		0	0	0	9	28	33		0	0	0	27	61	68		0	0	0	8	13	17
0	0	0	1	1	0		0	0	0	2	3	0		0	0	0	0	0	0		0	0	0	9	29	35		0	0	0	29	62	69		0	0	0	8	13	17
0	0	0	1	1	0		0	0	0	2	3	0		0	0	0	0	0	0		0	0	0	9	31	35		0	0	0	29	62	70		0	0	0	8	13	17
0	0	0	1	1	0		0	0	0	2	3	0		0	0	0	0	0	0		0	0	0	9	31	37		0	0	0	30	63	79		0	0	0	8	13	17
0	0	0	1	1	0		0	0	0	2	3	0		0	0	0	0	0	0		0	0	0	10	31	37		0	0	0	30	65	71		0	0	0	8	13	17
0	0	0	1	1	0		0	0	0	2	3	0		0	0	0	0	0	0		0	0	0	10	32	39		0	0	0	31	66	76		0	0	0	8	13	17
0	0	0	1	1	0		0	0	0	2	3	0		0	0	0	0	0	0		0	0	0	10	32	40		0	0	0	33	66	76		0	0	0	8	13	18
0	0	0	1	1	0		0	0	0	2	3	0		0	0	0	0	0	0		0	0	0	10	33	41		0	0	0	32	70	77		0	0	0	8	13	19
0	0	0	1	1	0		0	0	0	3	3	0		0	0	0	0	0	0		0	0	0	10	33	41		0	0	0	34	70	78		0	0	0	8	13	19
0	0	1	1	1	0		0	0	0	3	3	0		0	0	0	0	0	0		0	0	0	10	34	42		0	0	0	39	71	83		0	0	0	8	13	19
0	0	1	1	1	0		0	0	0	3	3	0		0	0	0	0	0	0		0	0	0	10	34	44		0	0	0	40	73	84		0	0	0	8	13	19
0	0	1	1	1	0		0	0	0	3	3	0		0	0	0	0	0	0		0	0	0	11	35	44		0	0	0	46	74	84		0	0	0	8	13	19
0	0	1	1	1	0		0	0	0	3	3	0		0	0	0	0	0	0		0	0	0	11	36	44		0	0	0	47	75	85		0	0	0	8	13	19
0	0	1	2	1	0		0	0	0	3	4	0		0	0	0	0	0	0		0	0	0	11	36	45		0	0	0	47	75	87		0	0	0	8	13	19
0	0	1	2	1	0		0	0	0	3	4	0		0	0	0	0	0	0		0	0	0	11	37	46		0	0	0	51	76	88		0	0	0	8	13	20
0	0	1	2	1	0		0	0	0	3	4	0		0	0	0	0	0	0		0	0	0	11	37	46		0	0	0	52	79	99		0	0	1	8	13	21
0	0	1	2	1	0		0	0	0	3	4	0		0	0	0	0	0	0		0	0	0	12	38	47		0	0	1	52	85	89		0	0	1	8	13	21
0	0	1	2	1	0		0	0	0	3	4	0		0	0	0	0	0	0		0	0	1	12	38	47		0	0	1	52	86	90		0	0	1	8	13	22
0	0	1	2	1	0		0	0	0	3	4	0		0	0	0	0	0	0		0	0	1	12	39	47		0	0	1	53	87	91		0	0	1	8	15	24
0	0	1	2	1	0		0	0	1	3	4	0		0	0	0	0	0	0		0	0	1	12	39	47		0	0	1	53	89	92		0	0	1	8	15	25
0	0	1	2	1	0		0	0	1	3	4	0		0	0	0	0	0	0		0	0	1	12	39	47		0	0	1	54	89	95		0	0	1	8	16	25
0	0	1	2	1	0		0	0	1	4	4	0		0	0	0	0	0	0		0	0	1	12	40	48		0	0	1	54	95	96		0	0	1	8	16	25
0	0	1	2	1	0		0	0	1	4	4	0		0	0	0	0	0	0		0	0	1	12	41	49		0	0	1	54	96	97		0	0	1	8	17	26
0	0	1	2	1	0		0	0	1	4	4	0		0	0	0	0	0	0		0	0	1	13	42	50		0	0	1	55	95	104		0	0	1	8	18	26
0	0	1	2	1	0		0	0	1	4	4	0		0	0	0	0	0	0		0	0	1	13	44	50		0	0	1	55	97	108		0	0	1	8	19	26
0	0	1	3	1	0		0	0	1	4	4	0		0	0	0	0	0	0		0	0	1	13	44	51		0	0	1	57	97	109		0	0	1	8	20	26
0	0	1	3	1	0		0	0	1	4	4	0		0	0	0	0	0	0		0	0	1	13	44	52		0	0	2	57	54.3818	113		0	0	1	8	21	26
0	0	1	3	1	0		0	0	1	4	4	0		0	0	0	0	0	0		0	0	1	13	43	55		0	0	2	57		114		0	0	1	8	22	26
0	0	1	3	1	0		0	0	1	4	4	0		0	0	0	1	0	0		0	0	1	13	45	57		0	0	2	58		115		0	0	1	8	23	26
0	0	1	3	1	0		0	0	1	4	4	0		0	0	0	1	0	0		0	0	1	13	44	57		0	0	2	60		115		0	0	1	8	24	27
0	0	1	3	1	0		0	0	1	4	4	0		0	0	0	1	0	0		0	0	1	13	47	59		0	0	2	60		118		0	0	1	8	24	28
0	0	1	3	1	0		0	0	1	4	4	0		0	0	0	1	0	0		0	0	1	13	49	59		0	0	2	61		119		0	0	1	8	25	29
0	0	1	3	1	0		0	0	1	4	4	0		0	0	0	1	0	0		0	0	1	13	50	60		0	0	3	61		120		0	0	2	9	26	29
0	0	1	3	1	0		0	0	1	4	4	0		0	0	0	1	1	0		0	0	1	13	55	61		0	0	3	61		120		0	0	2	9	27	30
0	0	1	3	1	0		0	0	1	4	5	0		0	0	0	1	1	0		0	0	1	13	55	63		0	0	3	62		75.3968		0	0	2	9	27	34
0	0	2	3	1	0		0	0	1	4	5	0		0	0	0	1	1	0		0	0	1	13	56	64		0	0	3	63				0	0	2	9	28	35
0	0	2	3	1	0		0	0	1	4	5	1		0	0	0	1	1	0		0	0	1	13	58	65		0	0	3	63				0	0	2	9	28	35
0	0	2	3	1	0		0	0	1	4	5	1		0	0	0	1	1	0		0	0	1	14	64	65		0	0	3	63				0	0	2	9	29	40
0	0	2	3	1	0		0	0	2	4	5	1		0	0	1	1	1	0		0	0	1	14	64	66		0	0	4	64				0	0	2	9	30	40
0	0	2	3	1	0		0	0	2	4	5	1		0	0	1	1	1	0		0	0	2	14	65	67		0	0	4	65				0	0	2	9	31	44
0	0	2	3	1	0		0	0	2	4	5	1		0	0	1	1	1	0		0	0	2	14	65	71		0	0	4	65				0	0	2	9	33	47
0	0	2	3	1	0		0	0	2	4	6	1		0	0	1	1	1	0		0	0	2	14	67	73		0	0	4	66				0	0	2	10	34	47
0	0	2	3	1	0		0	0	2	4	6	1		0	0	1	1	1	0		0	0	2	14	67	74		0	0	4	66				0	0	2	10	35	50
0	0	2	3	1	0		0	0	2	4	6	1		0	0	1	1	1	0		0	0	2	15	31.6111	75		0	0	4	35.4722				0	0	2	10	36	52
0	0	2	3	1	0		0	0	2	4	6	1		0	0	1	1	1	0		0	0	2	15		75		0	0	5					0	0	2	11	38	53
0	0	2	3	1	0		0	0	2	4	6	1		0	0	1	1	1	0		0	0	2	15		75		0	0	5					0	0	2	11	38	54
0	0	2	3	1	0		0	0	2	4	6	1		0	0	1	1	1	0		0	0	2	16		82		0	0	5					0	0	2	13	39	55
0	0	2	3	1	0		0	0	2	4	6	1		0	0	1	1	1	0		0	0	3	17		82		0	0	5					0	0	2	13	41	23.0395
0	0	2	3	1	0		0	0	2	5	6	1		0	0	1	1	1	0		0	0	3	17		84		0	0	5					0	0	2	13	44
0	0	2	3	1	0		0	0	2	5	6	2		0	0	1	2	1	0		0	0	3	17		85		0	0	5					0	0	2	13	17.0641
0	0	2	3	1	0		0	0	2	5	6	2		0	0	1	2	1	0		0	0	3	18		89		0	0	5					0	0	2	15
0	0	2	3	1	0		0	0	2	5	6	2		0	0	1	2	1	0		0	0	3	19		89		0	0	5					0	0	2	15
0	0	2	4	1	0		0	0	2	5	6	2		0	0	1	2	1	0		0	0	3	20		89		0	0	5					0	0	2	15
0	0	2	4	1	0		0	0	2	5	6	3		0	0	1	2	1	0		0	0	3	23		90		0	0	5					0	0	3	16
0	0	2	4	1	0		0	0	2	6	6	3		0	0	1	2	1	0		0	0	3	24		91		0	0	5					0	0	3	16
0	0	2	4	1	0		0	0	2	6	6	4		0	0	1	2	1	0		0	0	3	25		45.0476		0	0	5					0	0	3	17
0	0	2	4	2	0		0	0	2	6	6	5		0	0	1	2	1	0		0	0	3	25				0	0	6					0	0	3	8.62353
0	0	2	4	2	0		0	0	3	7	6	5		0	0	1	2	1	0		0	0	3	27				0	0	6					0	0	3
0	0	2	4	2	0		0	0	3	7	6	6		0	0	1	2	1	0		0	0	4	27				0	0	6					0	0	3
0	0	2	4	2	0		0	0	3	7	6	7		0	0	1	2	1	0		0	0	4	27				0	0	6					0	0	3
0	0	2	4	2	0		0	0	3	7	6	7		0	0	1	2	1	0		0	0	4	12.0674				0	0	6					0	0	3
0	0	2	4	2	0		0	0	3	7	6	8		0	0	1	2	1	0		0	0	4					0	0	6					0	0	3
0	0	2	4	2	0		0	0	3	7	6	8		0	0	1	2	1	0		0	0	4					0	0	7					0	0	3
0	0	2	4	2	0		0	0	3	7	6	9		0	0	2	2	1	0		0	0	4					0	0	7					0	0	3
0	0	2	4	3	0		0	0	3	7	7	10		0	0	2	3	1	0		0	0	4					0	0	7					0	0	3
0	0	2	4	3	0		0	0	3	7	7	10		0	0	2	3	1	0		0	0	5					0	0	7					0	0	3
0	0	3	4	3	0		0	0	3	7	7	10		0	0	2	3	1	0		0	0	5					0	0	7					0	0	3
0	0	3	4	3	0		0	0	3	7	7	13		0	0	2	3	1	0		0	0	5					0	0	7					0	0	4
0	0	3	4	3	0		0	0	3	7	7	13		0	0	2	2	1	0		0	0	5					0	0	7					0	0	4
0	0	3	4	3	0		0	0	3	7	7	13		0	0	2	2	1	0		0	0	5					0	1	2.13265					0	0	4
0	0	3	5	3	1		0	0	3	7	7	14		0	0	2	3	2	0		0	0	5					0	1						0	0	4
0	0	3	5	3	1		0	0	4	7	7	14		0	0	2	3	2	0		0	0	6					0	1						0	0	4
0	1	4	5	3	1		0	0	4	7	7	1.81188		0	0	2	3	2	0		0	0	6					0	1						0	0	4
0	1	4	5	3	1		0	0	4	7	7			0	0	2	3	2	1		0	0	6					0	1						0	1	4
0	1	4	5	3	1		0	0	4	7	7			0	0	2	3	2	1		0	0	6					0	1						0	1	5
0	1	4	5	3	1		0	0	4	7	7			0	0	2	4	2	1		0	1	7					0	1						0	1	5
0	1	4	5	3	1		0	0	4	7	7			0	0	2	4	2	1		0	1	7					0	1						0	1	5
0	1	4	5	3	1		0	0	5	7	7			0	0	2	4	3	1		0	1	7					0	1						0	1	5
0	1	4	5	4	1		0	0	5	7	7			0	0	2	5	3	1		0	1	7					0	1						0	1	5
0	1	4	5	4	1		0	0	5	7	7			0	0	2	5	3	1		0	1	7					0	1						0	1	5
0	1	4	6	4	1		0	0	5	7	7			0	0	2	5	3	1		0	1	7					0	1						0	1	5
0	1	4	6	4	1		0	1	5	7	7			0	0	3	5	3	1		0	1	8					0	1						0	1	5
0	1	4	6	4	1		0	1	5	7	7			0	1	3	5	3	1		0	1	1.82883					0	2						0	1	5
0	1	4	6	4	1		0	1	5	7	9			0	1	3	5	3	1		0	1						0	2						0	1	6
0	1	4	6	4	2		0	1	5	7	9			0	1	3	5	4	1		0	2						0	2						0	1	6
0	1	4	6	4	2		0	1	5	7	12			0	1	3	5	4	1		0	2						0	3						0	1	6
0	1	4	6	4	2		0	1	6	7	13			0	1	3	6	4	1		0	2						0	0.191304						0	1	6
0	1	4	6	4	2		0	1	6	7	13			0	1	3	6	4	1		0	3						0							0	1	1.7069
0	1	4	6	4	3		0	1	6	7	13			0	1	4	6	4	1		0	3						0							0	2
0	1	4	6	4	3		0	1	6	7	13			0	1	4	6	4	4		0	3						0							0	0.144068
0	1	4	6	4	3		0	1	6	7	4.86555			0	1	4	6	4	4		0	0.201681						0							0
0	1	4	6	5	12		0	2	6	8				0	1	4	6	4	13		0							0							0
0	1	4	6	5	12		0	2	7	8				0	1	4	6	5	13		0							0							0
0	1	4	6	5	0.45082		0	2	7	8				0	1	4	6	5	0.409836		0							0							0
0	1	4	6	6			0	0.130081	7	8				0	1	4	6	5			0							0							0
0	1	5	6	8			0		8	8				0	0.104839	4	7	6			0							0							0
0	1	5	6	10			0		8	13				0		5	7	6			0							0							0
0	1	5	6	1.80952			0		9	13				0		5	7	6			0							0							0
0	1	5	6				0		1.9685	13				0		6	7	7			0							0							0
0	1	5	6				0			4.57812				0		6	7	7			0							0							0
0	2	7	6				0							0		6	8	7			0							0							0
0	2	7	6				0							0		1.09231	9	1.21538			0							0							0
0	0.244275	7	6				0							0			9				0							0							0
0		7	6				0							0			9				0							0							0
0		1.88722	7				0							0			10				0							0							0
0			7				0							0			2				0							0							0
0			8				0							0							0							0							0
0			8				0							0							0							0							0
0			9				0							0							0							0							0
0			10				0							0							0							0							0
0			3.17986				0							0							0							0							0
0							0							0							0							0							0
0							0							0							0							0							0
0							0							0							0							0							0
0							0							0							0							0							0
0							0							0							0							0							0
0							0							0							0							0							0
0							0							0							0							0							0
0							0							0							0							0							0
0							0							0							0							0							0
0							0							0							0							0							0
0							0							0							0							0							0
0							0							0							0							0							0
0							0							0							0							0							0
0							0							0							0							0							0
0							0							0							0							0							0
0							0							0							0							0							0
0							0							0							0							0							0
0							0							0							0							0							0
0							0							0							0							0							0
0							0							0							0							0							0
0							0							0							0							0							0
0							0							0							0							0							0
0							0							0							0							0							0
0							0							0							0							0							0
0							0							0							0							0							0
0							0							0							0							0							0
0							0							0							0							0							0
0							0							0							0							0							0
0							0							0							0							0							0
0							0							0							0							0							0
0							0							0							0							0							0
0							0							0							0							0							0
0							0							0							0							0							0
0							0							0							0							0							0
0							0							0							0							0							0
0							0							0							0							0							0
0							0							0							0							0							0
0							0							0							0							0							0
0							0							0							0							0							0
0							0							0							0							0							0
0							0							0							0							0							0
0							0							0							0							0							0
0							0							0							0							0							0
0							0							0							0							0							0
0							0							0							0							0							0
0							0							0							0							0							0
0							0							0							0							0							0
0							0							0							0							0							0
0							0							0							0							0							0
0							0							0							0							0							0
0							0							0							0							0							0
0							0							0							0							1							0
0							0							0							0							1							0
0							0							0							0							1							0
0							0							0							0							1							0
0							0							0							0							1							0
0							0							0							0							1							0
0							0							0							0							1							0
0							0							0							0							1							0
0							0							0							0							1							0
0							0							0							0							1							0
0							0							0							0							1							0
0							0							1							0							1							0
1							0							0							0							1							0
0							0							0							0							1							0
0							0							0							0							1							0
0							0							0							0							1							0
0							0							0							0							1							0
0							0							0							0							2							0
0							0							0							0							2							1
0							0							0							0							3							1
0							0							1							0							3							1
0							0							1							0							0.127358							1
0							0							1							0														1
0							0							1							0														1
0							0							1							0														1
0							0							1							0														1
0							0							1							0														1
0							0							1							0														1
0							0							1							0														1
0							0							1							1														1
0							0							1							1														1
0							0							1							1														1
0							0							1							1														1
0							0							1							1														1
0							0							1							1														1
0							0							1							1														1
0							0							1							1														2
0							0							1							1														3
0							0							1							1														0.100437
0							0							1							1
0							0							1							1
1							0							1							1
1							1							0.0987124							1
1							1														2
1							1														2
1							1														2
1							1														3
1							1														3
1							1														0.108787
1							1
1							1
1							1
1							1
1							1
1							2
1							0.0569106
1
1
1
0.076

## Sheet: Sheet2
			Mean no. of RAD-51 foci per nucleus
	Zone 1	Zone 2	Zone 3	Zone 4	Zone 5	Zone 6
Wild type	0.07	0.24	1.8	3.1	1.35	0.45
syp-4(S269A)	0.05	0.1	1.9	4.5	4.8	1.8
syp-4(S269D)	0.09	0.1	1	2	1.2	0.4
rad-54(RNAi)	0.1	0.2	1.8	12	31.6	45
syp-4(S269A) rad-54(RNAi)	0.12	0.19	2.1	35	54.3	75
syp-4(S269D) rad-54(RNAi)	0.1	0.1	1.7	8.6	17	23
			Number of nuclei scored
	Zone 1	Zone 2	Zone 3	Zone 4	Zone 5	Zone 6
Wild type	250	130	132	139	126	122
syp-4(S269A)	246	124	127	128	120	103
syp-4(S269D)	234	126	130	134	131	121
rad-54(RNAi)	239	119	111	89	72	84
syp-4(S269A) rad-54(RNAi)	212	115	98	73	64	63
syp-4(S269D) rad-54(RNAi)	229	118	116	85	81	77
Mean # of	235	122	119	108	99	95
nuclei scored
