# Supplementary material for: Polo-like kinase-dependent phosphorylation of the synaptonemal complex protein SYP-4 regulates double-strand break formation through a negative feedback loop
Source: eLife. 2017 Mar 27;6:e23437. doi: 10.7554/eLife.23437 (PMC5423773; doi:10.7554/eLife.23437)
Supplement: Figure 6—source data 1. — DOI: http://dx.doi.org/10.7554/eLife.23437.019 [file elife-23437-fig6-data1.xlsx]

## Sheet: Sheet1
			AVERAGES								Standard Deviations							Standard Error
Time (s)	WT-MP	syp-4(S269D)-MP	syp-4(S269A)-MP	WT-LZ	syp-4(S269D)-LZ	syp-4(S269A)-LZ			WT-MP	syp-4(S269D)-MP	syp-4(S269A)-MP	WT-LZ	syp-4(S269D)-LZ	syp-4(S269A)-LZ		WT-MP	syp-4(S269D)-MP	syp-4(S269A)-MP	WT-LZ	syp-4(S269D)-LZ	syp-4(S269A)-LZ
-1	1.00467	1.04988	1.03068	1.04992	1.03257	0.989832			0.0429287	0.0638752	0.0604907	0.0816484	0.0968843	0.0917395		0.00959915	0.0150555	0.0135261	0.0157132	0.0222268	0.0205136
-0.5	0.995307	0.951195	0.969242	0.952639	0.968004	1.01065			0.0432053	0.0627484	0.0607222	0.0773153	0.0953328	0.0908137		0.00966101	0.0147899	0.0135779	0.0148793	0.0218708	0.0203066
0	0	0	0	0	0	0			0	0	0	0	0	0		0	0	0	0	0	0
0.5	0.00944803	0.0385069	0.0822589	0.145804	0.0544291	0.124437			0.0668977	0.0837383	0.07484	0.193177	0.0834902	0.0972777		0.0149588	0.0197373	0.0167347	0.037177	0.019154	0.0217519
1	0.0657695	0.0271318	0.0962834	0.198016	0.101971	0.182527			0.116715	0.0884529	0.109023	0.173589	0.120082	0.140895		0.0260983	0.0208485	0.0243782	0.0334073	0.0275486	0.031505
1.5	0.0752648	0.0564855	0.162838	0.248133	0.145624	0.292252			0.107151	0.094541	0.109134	0.121169	0.098505	0.183126		0.0239597	0.0222835	0.0244032	0.023319	0.0225986	0.0409483
2	0.0891268	0.128792	0.181053	0.330961	0.146127	0.304585			0.0957951	0.144857	0.136742	0.187703	0.0880691	0.18444		0.0214204	0.0341432	0.0305764	0.0361234	0.0202044	0.041242
2.5	0.116555	0.118096	0.228906	0.355337	0.161194	0.374902			0.101575	0.10631	0.133811	0.161794	0.117016	0.198639		0.0227128	0.0250576	0.0299211	0.0311373	0.0268453	0.044417
3	0.14768	0.124899	0.248352	0.395574	0.19678	0.392529			0.140911	0.116874	0.156812	0.198067	0.145595	0.234862		0.0315086	0.0275475	0.0350642	0.038118	0.0334019	0.0525167
3.5	0.147513	0.152873	0.288541	0.386624	0.212276	0.4157			0.128645	0.124872	0.203879	0.151024	0.0924323	0.203471		0.0287658	0.0294327	0.0455887	0.0290645	0.0212054	0.0454975
4	0.155637	0.158741	0.308379	0.43452	0.191252	0.44226			0.102443	0.127779	0.168316	0.228082	0.0848077	0.208993		0.022907	0.0301178	0.0376366	0.0438944	0.0194562	0.0467322
4.5	0.142048	0.173806	0.349303	0.487299	0.226553	0.442099			0.0748842	0.161406	0.147437	0.196213	0.10563	0.190257		0.0167446	0.0380437	0.0329678	0.0377612	0.0242333	0.0425427
5	0.185826	0.173206	0.367553	0.475586	0.234015	0.461637			0.101061	0.118597	0.16042	0.195581	0.0983649	0.191618		0.022598	0.0279536	0.035871	0.0376395	0.0225665	0.042847
5.5	0.181921	0.189498	0.424851	0.502779	0.221089	0.476822			0.0914623	0.136235	0.166971	0.190168	0.107932	0.17929		0.0204516	0.0321109	0.0373359	0.0365978	0.0247614	0.0400904
6	0.197564	0.180333	0.435402	0.514128	0.232104	0.491459			0.0804933	0.143258	0.164708	0.206946	0.0817809	0.191566		0.0179988	0.0337662	0.0368299	0.0398268	0.0187618	0.0428354
6.5	0.181002	0.197336	0.484355	0.562375	0.241115	0.502704			0.103219	0.130558	0.187201	0.249444	0.106024	0.180926		0.0230804	0.0307728	0.0418595	0.0480056	0.0243236	0.0404563
7	0.233209	0.182008	0.48944	0.567538	0.244388	0.521223			0.120805	0.122888	0.208334	0.256677	0.0936359	0.201858		0.0270127	0.028965	0.0465849	0.0493975	0.0214816	0.0451367
7.5	0.190021	0.21299	0.511677	0.587852	0.251692	0.507779			0.0940954	0.131427	0.211769	0.270666	0.100526	0.157733		0.0210404	0.0309776	0.0473531	0.0520896	0.0230622	0.0352703
8	0.270809	0.211599	0.539046	0.558424	0.259306	0.497816			0.138338	0.108879	0.199098	0.251658	0.109161	0.148045		0.0309334	0.0256629	0.0445197	0.0484316	0.0250432	0.0331038
8.5	0.243181	0.203172	0.54364	0.606069	0.280906	0.536151			0.0853964	0.105333	0.200778	0.252206	0.125734	0.181023		0.0190952	0.0248273	0.0448953	0.0485371	0.0288454	0.040478
9	0.258092	0.224558	0.564797	0.59941	0.290926	0.522057			0.0929263	0.109038	0.174257	0.225923	0.148565	0.181067		0.020779	0.0257005	0.0389651	0.0434789	0.0340832	0.0404878
9.5	0.272505	0.207671	0.571395	0.630787	0.290597	0.497879			0.128621	0.120746	0.170062	0.263207	0.136834	0.14676		0.0287605	0.0284602	0.0380271	0.0506542	0.031392	0.0328165
10	0.268654	0.207524	0.613642	0.59978	0.261046	0.495863			0.10077	0.101497	0.200328	0.240045	0.111016	0.184377		0.0225328	0.0239232	0.0447947	0.0461967	0.0254689	0.041228
10.5	0.28195	0.193453	0.627176	0.569811	0.299017	0.531051			0.126322	0.0904956	0.185895	0.223521	0.147048	0.192789		0.0282464	0.02133	0.0415674	0.0430166	0.033735	0.043109
11	0.285636	0.199862	0.674294	0.605267	0.319484	0.541919			0.118259	0.104688	0.214832	0.208135	0.184654	0.172005		0.0264434	0.0246752	0.0480379	0.0400556	0.0423625	0.0384615
11.5	0.306454	0.206107	0.654573	0.670217	0.295905	0.511098			0.119591	0.10245	0.193389	0.252148	0.154655	0.165178		0.0267413	0.0241477	0.043243	0.0485259	0.0354804	0.0369348
12	0.305132	0.218156	0.65003	0.661691	0.297757	0.526361			0.155857	0.108044	0.18814	0.265701	0.137685	0.174709		0.0348507	0.0254662	0.0420695	0.0511343	0.0315871	0.0390662
12.5	0.287114	0.237739	0.66533	0.654537	0.303247	0.523825			0.18858	0.121857	0.1954	0.298329	0.168971	0.165589		0.0421678	0.0287219	0.0436928	0.0574134	0.0387646	0.0370269
13	0.298608	0.224113	0.700681	0.661879	0.30206	0.559023			0.127969	0.104528	0.220689	0.27695	0.164571	0.17457		0.0286148	0.0246374	0.0493476	0.053299	0.0377552	0.0390351
13.5	0.316592	0.217727	0.738869	0.645419	0.288946	0.564015			0.16176	0.1228	0.267658	0.294253	0.147183	0.154542		0.0361707	0.0289443	0.0598501	0.0566291	0.0337661	0.0345566
14	0.28904	0.225709	0.754659	0.696039	0.340543	0.550554			0.130104	0.116567	0.244656	0.280995	0.164518	0.13765		0.0290922	0.0274752	0.0547067	0.0540775	0.037743	0.0307794
14.5	0.312446	0.23472	0.772649	0.707145	0.322376	0.551239			0.126402	0.120203	0.265273	0.274456	0.119659	0.144982		0.0282643	0.0283321	0.059317	0.0528191	0.0274516	0.0324191
15	0.313805	0.23432	0.780889	0.708271	0.295524	0.555604			0.113855	0.133385	0.262262	0.264166	0.126431	0.152747		0.0254587	0.0314391	0.0586435	0.0508389	0.0290051	0.0341552
15.5	0.326426	0.222095	0.757852	0.722835	0.337292	0.57784			0.11586	0.115265	0.22357	0.291017	0.148111	0.187174		0.0259072	0.0271682	0.0499917	0.0560062	0.033979	0.0418533
16	0.318219	0.223612	0.779786	0.694926	0.318688	0.558539			0.128787	0.111597	0.258635	0.258488	0.139803	0.147171		0.0287977	0.0263038	0.0578325	0.049746	0.0320731	0.0329084
16.5	0.334129	0.238376	0.784618	0.716054	0.325801	0.566862			0.115688	0.122918	0.257681	0.289158	0.16078	0.161599		0.0258687	0.0289721	0.0576192	0.0556485	0.0368854	0.0361346
17	0.338459	0.231316	0.804807	0.733357	0.319039	0.582298			0.0886456	0.114956	0.271852	0.269509	0.147116	0.180561		0.0198218	0.0270954	0.060788	0.0518671	0.0337508	0.0403747
17.5	0.327674	0.210485	0.787701	0.744717	0.321605	0.572363			0.11559	0.116968	0.268392	0.274615	0.134851	0.139241		0.0258467	0.0275696	0.0600142	0.0528496	0.0309368	0.0311353
18	0.334176	0.220793	0.793336	0.751384	0.323434	0.579744			0.122379	0.101668	0.253658	0.272481	0.136733	0.140796		0.0273649	0.0239635	0.0567196	0.052439	0.0313687	0.0314829
18.5	0.329963	0.232304	0.807201	0.715216	0.348562	0.59604			0.0958549	0.113996	0.264443	0.271465	0.13502	0.181686		0.0214338	0.0268692	0.0591313	0.0522434	0.0309757	0.0406263
19	0.316701	0.227189	0.795078	0.762359	0.346325	0.58097			0.131846	0.10638	0.259391	0.274926	0.140913	0.11679		0.0294818	0.025074	0.0580016	0.0529095	0.0323277	0.026115
19.5	0.343561	0.241061	0.787265	0.741685	0.346353	0.59558			0.103852	0.10846	0.266624	0.262095	0.135559	0.189527		0.0232221	0.0255643	0.059619	0.0504403	0.0310993	0.0423795
20	0.300761	0.246946	0.829932	0.75098	0.354378	0.587275			0.116212	0.11523	0.288811	0.27936	0.113676	0.129346		0.0259859	0.02716	0.0645801	0.0537628	0.0260791	0.0289226
20.5	0.333743	0.259553	0.815339	0.735226	0.338319	0.586896			0.0915817	0.105995	0.252604	0.270087	0.104823	0.134481		0.0204783	0.0249832	0.0564839	0.0519783	0.0240481	0.0300708
21	0.339368	0.212002	0.825407	0.769068	0.357079	0.585614			0.0930342	0.106553	0.265943	0.299203	0.128474	0.135426		0.0208031	0.0251148	0.0594667	0.0575816	0.0294739	0.0302822
21.5	0.338677	0.23347	0.814737	0.77034	0.332661	0.59798			0.109285	0.110111	0.246702	0.269781	0.152	0.139319		0.024437	0.0259534	0.0551643	0.0519194	0.0348712	0.0311527
22	0.365251	0.231566	0.798915	0.77846	0.366965	0.628538			0.0896956	0.101021	0.228976	0.2609	0.157126	0.160483		0.0200565	0.0238109	0.0512006	0.0502102	0.0360473	0.0358851
22.5	0.378473	0.221221	0.819519	0.770158	0.359331	0.588319			0.122994	0.10547	0.25079	0.251694	0.149982	0.129331		0.0275022	0.0248595	0.0560784	0.0484385	0.0344083	0.0289193
23	0.361638	0.226828	0.836724	0.775739	0.347373	0.618005			0.104489	0.0976982	0.247791	0.247989	0.124648	0.123089		0.0233645	0.0230277	0.0554079	0.0477255	0.0285961	0.0275236
23.5	0.366233	0.210265	0.832294	0.788073	0.370146	0.603747			0.11082	0.121319	0.236622	0.262353	0.142111	0.119887		0.0247801	0.0285951	0.0529102	0.0504899	0.0326025	0.0268075
24	0.346006	0.244377	0.847208	0.751296	0.355238	0.60217			0.108343	0.104296	0.231399	0.225198	0.109812	0.174883		0.0242263	0.0245829	0.0517425	0.0433394	0.0251927	0.039105
24.5	0.359004	0.218233	0.84801	0.758973	0.370172	0.617113			0.0949045	0.117728	0.243728	0.260635	0.127529	0.200457		0.0212213	0.0277488	0.0544992	0.0501592	0.0292571	0.0448236
25	0.371836	0.228816	0.853006	0.759858	0.347721	0.625844			0.117044	0.108538	0.220236	0.256914	0.145169	0.217816		0.0261719	0.0255826	0.0492464	0.0494431	0.0333041	0.0487051
25.5	0.367467	0.242365	0.888674	0.779229	0.337823	0.617041			0.101602	0.113635	0.248944	0.243236	0.111822	0.210318		0.0227189	0.0267841	0.0556655	0.0468108	0.0256537	0.0470285
26	0.35343	0.236514	0.879896	0.754366	0.361543	0.636535			0.116421	0.102879	0.249215	0.24156	0.125931	0.195926		0.0260326	0.0242488	0.0557262	0.0464882	0.0288905	0.0438104
26.5	0.386578	0.24483	0.885154	0.772307	0.364238	0.61727			0.110583	0.121234	0.239074	0.25545	0.116541	0.228312		0.0247271	0.0285752	0.0534585	0.0491613	0.0267362	0.0510522
27	0.396198	0.215346	0.863389	0.797354	0.332231	0.620163			0.101393	0.120826	0.229155	0.236975	0.124818	0.176373		0.0226722	0.0284789	0.0512407	0.0456059	0.0286352	0.0394382
27.5	0.362731	0.228159	0.886479	0.797348	0.372009	0.605073			0.109138	0.107757	0.245123	0.261371	0.128881	0.220418		0.0244039	0.0253985	0.0548112	0.0503009	0.0295673	0.049287
28	0.412809	0.233034	0.896902	0.797338	0.385905	0.621375			0.124927	0.102096	0.2323	0.252762	0.140704	0.198704		0.0279346	0.0240642	0.0519438	0.0486441	0.0322796	0.0444315
28.5	0.40913	0.22123	0.889301	0.821087	0.386576	0.618444			0.14434	0.0996447	0.234649	0.254452	0.125284	0.184061		0.0322753	0.0234865	0.052469	0.0489693	0.0287421	0.0411572
29	0.390215	0.227596	0.875156	0.834809	0.37763	0.607469			0.144183	0.0943561	0.210991	0.27261	0.117891	0.191115		0.0322403	0.0222399	0.047179	0.0524639	0.027046	0.0427345
29.5	0.382082	0.224107	0.887581	0.818363	0.39464	0.581153			0.114996	0.0999412	0.225683	0.214864	0.11589	0.178607		0.0257139	0.0235564	0.0504643	0.0413506	0.0265871	0.0399377
30	0.3955	0.21776	0.890086	0.818129	0.37043	0.599312			0.125019	0.112153	0.223694	0.25111	0.124186	0.175169		0.0279551	0.0264348	0.0500196	0.0483262	0.0284902	0.0391689
30.5	0.406676	0.224091	0.898053	0.837254	0.402341	0.610864			0.105767	0.106542	0.23038	0.25613	0.1373	0.207675		0.0236501	0.0251122	0.0515145	0.0492922	0.0314987	0.0464375
31	0.393898	0.220462	0.897033	0.827737	0.346349	0.598548			0.125077	0.118763	0.225323	0.214717	0.130185	0.204441		0.0279681	0.0279928	0.0503837	0.0413223	0.0298666	0.0457145
31.5	0.400183	0.237395	0.919583	0.841345	0.389159	0.618162			0.10851	0.0927873	0.226822	0.197277	0.121498	0.205172		0.0242635	0.0218702	0.050719	0.037966	0.0278736	0.0458779
32	0.40132	0.23657	0.906442	0.844131	0.383824	0.630612			0.107265	0.0885052	0.229691	0.219601	0.13727	0.236349		0.0239851	0.0208609	0.0513606	0.0422621	0.031492	0.0528492
32.5	0.375435	0.234323	0.921562	0.861846	0.401836	0.603579			0.111323	0.092581	0.214582	0.204558	0.139968	0.212674		0.0248927	0.0218216	0.047982	0.0393672	0.0321109	0.0475554
33	0.381031	0.235816	0.937714	0.853312	0.394078	0.61114			0.122512	0.0927255	0.249273	0.228389	0.144809	0.190421		0.0273945	0.0218556	0.0557392	0.0439536	0.0332215	0.0425795
33.5	0.374806	0.229881	0.882305	0.869999	0.382791	0.578016			0.106143	0.105495	0.214458	0.2514	0.138055	0.182016		0.0237342	0.0248654	0.0479543	0.048382	0.031672	0.0407
34	0.427631	0.224614	0.907198	0.877039	0.392623	0.600636			0.112142	0.116883	0.22571	0.221994	0.135841	0.15876		0.0250758	0.0275495	0.0504702	0.0427227	0.0311641	0.0354998
34.5	0.401093	0.235219	0.910433	0.859618	0.385939	0.609018			0.119602	0.109159	0.202974	0.23722	0.136868	0.230408		0.0267439	0.025729	0.0453863	0.045653	0.0313998	0.0515209
35	0.402038	0.232326	0.931185	0.857126	0.401971	0.602493			0.112629	0.12799	0.238352	0.233899	0.152843	0.206343		0.0251846	0.0301675	0.0532972	0.0450139	0.0350645	0.0461398
35.5	0.388916	0.211755	0.929853	0.850993	0.396984	0.594534			0.113663	0.105006	0.226121	0.231704	0.150488	0.187217		0.0254159	0.0247502	0.0505622	0.0445915	0.0345244	0.041863
36	0.418934	0.246171	0.905523	0.866814	0.399844	0.598519			0.118809	0.0870126	0.194522	0.24232	0.146893	0.165464		0.0265665	0.0205091	0.0434966	0.0466344	0.0336995	0.0369989
36.5	0.3738	0.248374	0.938578	0.898174	0.411175	0.587587			0.112501	0.0602343	0.227587	0.234237	0.157922	0.171693		0.0251561	0.0141974	0.0508901	0.0450788	0.0362298	0.0383917
37	0.412915	0.241101	0.942058	0.860276	0.418471	0.609261			0.103228	0.070395	0.223694	0.226922	0.148118	0.173894		0.0230825	0.0165923	0.0500195	0.0436712	0.0339806	0.0388839
37.5	0.3869	0.244683	0.964139	0.851892	0.406863	0.626325			0.116856	0.0595162	0.225334	0.208295	0.131078	0.194575		0.0261298	0.0140281	0.0503862	0.0400863	0.0300713	0.0435083
38	0.38597	0.255309	0.956412	0.849253	0.377438	0.602211			0.0918093	0.063583	0.228022	0.262426	0.136173	0.177452		0.0205292	0.0149866	0.0509874	0.050504	0.0312402	0.0396794
38.5	0.368271	0.257533	0.945461	0.853799	0.412891	0.622839			0.0748376	0.0626447	0.218765	0.238891	0.139758	0.204874		0.0167342	0.0147655	0.0489174	0.0459746	0.0320627	0.0458113
39	0.357964	0.269653	0.947114	0.86025	0.397194	0.609142			0.096018	0.0659555	0.214026	0.199554	0.124331	0.200964		0.0214703	0.0155459	0.0478576	0.0384042	0.0285234	0.0449369
39.5	0.388763	0.248153	0.945889	0.856252	0.404534	0.59776			0.0711297	0.079341	0.198625	0.228991	0.126344	0.176298		0.0159051	0.0187009	0.0444138	0.0440694	0.0289853	0.0394215

## Sheet: Sheet2
Time (s)	WT-MP_1	WT-MP_2	WT-MP_3	WT-MP_4	WT-MP_5	WT-MP_6			WT-MP_9	WT-MP_10	WT-MP_1	WT-MP_2	WT-MP_3	WT-MP_4	WT-MP_5	WT-MP_6	WT-MP_7	WT-MP_8	WT-MP_9	WT-MP_10	WT-MP_11	WT-MP_12		syp-4(S269D)-MP_1	syp-4(S269D)-MP_2	syp-4(S269D)-MP_3	syp-4(S269D)-MP_4	syp-4(S269D)-MP_5	syp-4(S269D)-MP_6	syp-4(S269D)-MP_7	syp-4(S269D)-MP_8	syp-4(S269D)-MP_9			syp-4(S269D)-MP_1		syp-4(S269D)-MP_3	syp-4(S269D)-MP2_4	syp-4(S269D)-MP2_5	syp-4(S269D)-MP2_6		syp-4(S269D)-MP_8	syp-4(S269D)-MP_9		syp-4(S269D)-MP_11	syp-4(S269D)-MP_12		syp-4(S269A)-MP_1	syp-4(S269A)_2
-1	0.947662	0.946668	0.953881	1.12542	1.02447	1.01351			1.02524	1.01698	0.966398	1.02445	1.01763	0.974907	1.05584	0.980187	1.00288	0.980165	0.972793	1.04028	1.03519	0.988882		0.997488	1.05669	1.00835	0.949677	1.00734	1.08618	0.975375	1.14714	1.01269			1.15019		1.01737	1.14604	1.03244	1.12246		0.997264	1.11521		1.00618	1.06982		0.998583	1.03848
-0.5	1.05285	1.05386	1.04657	0.873343	0.975294	0.986353			0.974516	0.982856	1.03354	0.975597	0.98241	1.02504	0.944272	1.01977	0.997124	1.0198	1.02715	0.959803	0.964884	1.0111		1.00255	0.942525	0.991537	1.05102	0.992563	0.912629	1.02496	0.850834	0.987138			0.855006		0.983234	0.859007	0.968686	0.881776		1.00264	0.888776		0.994034	0.932598		1.00143	0.961213
0	0	0	0	0	0	0			0	0	0	0	0	0	0	0	0	0	0	0	0	0		0	0	0	0	0	0	0	0	0			0		0	0	0	0		0	0		0	0		0	0
0.5	-0.0280044	0.0194067	0.119611	-0.109845	0.00782434	-0.0458784			0.0282173	-0.0298689	0.0930516	0.0623747	-0.00334044	-0.0254984	0.146824	-0.012599	-0.0469255	0.0382641	-0.0673574	0.0845122	-0.0671752	0.0253678		0.16455	0.288029	0.0562219	0.077903	0.0625249	-0.0786227	0.0331337	0.0963433	0.0333804			-0.0429708		-0.00511093	0.0236439	-0.014011	0.016474		0.00467694	-0.0145774		0.0263805	-0.0348446		0.0794023	0.078891
1	-0.0786981	0.080456	0.0594515	-0.0944576	0.063637	-0.00378779			-0.00497434	0.00144495	0.13367	0.32457	0.139739	0.366416	0.0879323	0.0179096	-0.0470808	0.0609543	0.0451552	0.13312	-0.03469	0.0646237		0.0152421	0.13636	-0.0489718	-0.0420454	0.20953	-0.043165	0.0130815	0.233842	0.0756383			-0.0250396		-0.0351501	-0.0350476	0.0394789	0.0309522		0.0690658	-0.0701035		0.00481973	-0.040114		0.210978	0.148336
1.5	-0.0438725	0.0296864	0.0868196	0.0318626	0.0551211	0.0195844			0.0943412	0.0668834	0.0453127	0.424494	0.152233	0.0973661	0.0921295	0.0984496	-0.138696	0.0901726	0.103765	0.172528	-0.0175533	0.0446675		0.204569	0.29042	0.0384316	-0.0361568	0.111433	0.0352119	0.00174584	0.194779	0.0729073			-0.0472145		0.0350413	0.0446312	-0.00210275	-0.0377412		0.128233	0.000581147		-0.00968376	-0.00834781		0.349038	0.188236
2	0.000275939	0.0972002	-8.70885e-06	0.148495	0.0409043	-0.0139586			0.0271092	0.0213964	0.0775686	0.324353	0.17053	0.0662119	0.115146	0.0270315	-0.011503	0.145436	0.0127471	0.302552	0.102919	0.12813		0.219775	0.414608	0.121768	-0.0205044	0.431031	0.120929	0.0347771	0.364133	0.177605			0.047936		0.0579173	0.0750479	0.0672286	0.0559535		0.17025	0.0446731		-0.0645786	-0.000301325		0.285562	0.207599
2.5	0.0189106	0.087909	0.0479039	0.125013	0.0589248	0.00853852			-0.0221769	0.127329	0.329971	0.307427	0.174442	0.269849	0.0623367	0.127057	0.00090373	0.135836	0.0511023	0.239784	0.0856971	0.0943367		0.209415	0.326359	0.167565	0.0586249	0.118487	0.0251557	0.0828198	0.33927	0.183492			0.00205953		0.141241	0.0477034	0.12528	0.026471		0.221515	0.0530325		-0.0168616	0.0141053		0.261893	0.179436
3	0.0730426	0.0796556	0.0936878	0.0563986	0.115413	0.100082			0.0425237	0.122469	0.233893	0.290934	0.198802	0.635317	0.130459	0.0897983	-0.0413019	0.163241	0.0848976	0.289747	0.139968	0.0545735		0.386742	0.311678	0.187424	0.111985	0.0271706	0.0374896	0.114119	0.285849	0.196319			-0.0459676		0.0482891	0.0545085	0.0495196	0.12319		0.220905	0.0211923		0.0274035	0.0903699		0.333091	0.327418
3.5	-0.0267302	0.0352147	0.13896	0.173747	0.109814	0.00700619			0.0874789	0.184492	0.523694	0.176004	0.258068	0.257262	0.21441	0.0990494	-0.0895146	0.144302	0.159899	0.261662	0.119531	0.115916		0.444832	0.286409	0.213365	0.114749	0.0567744	0.0574033	0.21299	0.29016	0.275965			-0.074051		0.0574197	0.116229	0.117492	0.129395		0.255439	0.0877545		0.0150408	0.0943446		0.348354	0.30819
4	0.0381973	0.131131	0.14207	0.158469	0.096005	0.0881211			0.0323073	0.195468	0.438335	0.256097	0.184187	0.291267	0.226175	0.0732574	0.0288952	0.146646	0.0654163	0.265805	0.106136	0.148755		0.461939	0.402137	0.222836	0.129837	0.189344	0.128038	0.163305	0.197273	0.193921			0.0114542		0.0643994	0.066999	0.0579933	0.113653		0.319589	0.0375874		0.0286774	0.0683552		0.329615	0.311608
4.5	0.0167749	0.109645	0.142603	0.20414	0.14226	0.0921772			0.0920121	0.235898	0.129812	0.279877	0.196736	0.0414192	0.2031	0.0493043	0.175378	0.20322	0.0143103	0.180914	0.122347	0.20903		0.476056	0.597817	0.162295	0.039664	0.219437	-0.00504445	0.0853319	0.275528	0.252957			0.111468		0.0635385	0.188372	0.0876102	0.0509781		0.302856	0.146721		0.0118001	0.0611211		0.361259	0.355902
5	0.0636431	0.190407	0.2475	0.238853	0.123026	0.108682			0.113113	0.23224	0.211954	0.501622	0.23055	0.121823	0.286183	0.0447644	0.183908	0.204509	0.0664184	0.234283	0.156416	0.156624		0.238177	0.524956	0.213873	0.0441415	0.250618	0.0957269	0.205286	0.179262	0.245678			0.141496		0.031374	0.14682	0.146128	0.155421		0.291718	0.121127		0.0208152	0.0650973		0.421976	0.362752
5.5	0.00453426	0.223685	0.140209	0.221551	0.178359	0.083544			0.175007	0.259736	0.148044	0.450957	0.230146	0.127022	0.166495	0.166555	0.207193	0.161221	0.0356086	0.218685	0.236809	0.203053		0.471102	0.508624	0.213379	0.035155	0.143083	0.0926447	0.171116	0.342137	0.19157			0.170343		0.098538	0.0823884	0.165785	0.132946		0.328587	0.0693049		0.103501	0.0907632		0.46053	0.371925
6	0.100224	0.300685	0.136858	0.24221	0.21014	0.0604607			0.0934376	0.217664	0.297826	0.39818	0.202351	0.189643	0.137333	0.162573	0.228156	0.193437	0.124804	0.238791	0.251282	0.165226		0.480477	0.538555	0.191059	0.0252505	0.168453	0.0569648	0.157112	0.230998	0.221019			0.189909		0.0647592	0.105509	0.0939589	0.168378		0.336532	0.0818658		0.0711476	0.0640413		0.443585	0.380672
6.5	0.0220293	0.246951	0.151926	0.209333	0.155145	0.0941757			0.118721	0.263176	0.167856	0.419229	0.28125	-0.0201612	0.0958284	0.17643	0.193501	0.202602	0.0933399	0.349434	0.210383	0.188899		0.432825	0.499271	0.20068	0.0746205	0.10207	0.0201699	0.13455	0.299095	0.229013			0.151192		0.0571544	0.192834	0.126632	0.192927		0.388955	0.182259		0.118028	0.149765		0.428844	0.41169
7	0.132145	0.327955	0.25939	0.242994	0.194301	0.220601			0.225908	0.173513	0.196737	0.515871	0.307469	0.0257698	0.161632	0.0976167	0.272876	0.291143	0.117379	0.511456	0.193031	0.196391		0.434707	0.417176	0.178221	0.0578212	0.033912	0.0606158	0.148513	0.268916	0.177547			0.213688		0.0473752	0.156344	0.169224	0.248347		0.352257	0.160283		0.0632049	0.0879858		0.439362	0.435368
7.5	0.0507199	0.362388	0.201611	0.212351	0.175022	0.170664			0.115296	0.23873	0.0615931	0.113197	0.312478	0.278265	0.103267	0.0777028	0.310199	0.227201	0.0835038	0.282613	0.148936	0.274686		0.403419	0.486699	0.196134	0.122687	0.384605	0.0525489	0.142878	0.366834	0.197611			0.233049		0.0646588	0.165557	0.139944	0.228195		0.342289	0.149776		0.0405201	0.116411		0.429793	0.519734
8	0.0738392	0.312004	0.201694	0.221118	0.234806	0.185425			0.126113	0.305721	0.642459	0.518829	0.321722	0.261629	0.225978	0.187733	0.43826	0.308175	0.0780727	0.317899	0.2016	0.253103		0.373408	0.435485	0.200437	0.155329	0.267465	0.0290815	0.152508	0.337805	0.177885			0.27469		0.146128	0.142432	0.150318	0.225163		0.358704	0.178374		0.0784551	0.125122		0.43908	0.537651
8.5	0.179196	0.429218	0.28792	0.262337	0.246988	0.194493			0.172116	0.310243	0.267651	0.373591	0.239919	0.260927	0.0651787	0.234251	0.333465	0.182361	0.146058	0.287795	0.131975	0.257932		0.386247	0.383664	0.192654	0.119334	0.243834	0.0416421	0.128908	0.391234	0.168295			0.214178		0.175963	0.135896	0.13767	0.216159		0.325989	0.185093		0.0819986	0.128345		0.473942	0.435794
9	0.143523	0.316262	0.239179	0.163378	0.247845	0.192543			0.164423	0.280772	0.277135	0.431293	0.452176	0.327436	0.237329	0.271093	0.338291	0.334401	0.0714231	0.2393	0.205267	0.228764		0.446042	0.439438	0.19579	0.143551	0.326712	0.157828	0.126859	0.360704	0.198878			0.215649		0.185146	0.123469	0.166959	0.261699		0.319233	0.13343		0.107529	0.133132		0.461452	0.386987
9.5	0.0809591	0.378996	0.187188	0.133817	0.24821	0.260518			0.201174	0.264789	0.476653	0.497471	0.405804	0.350747	0.171965	0.143553	0.455836	0.325206	0.043208	0.274519	0.243079	0.306407		0.373827	0.402438	0.160629	0.0899891	0.284256	0.118578	0.102524	0.4151	0.139109			0.271997		0.137359	0.0782894	0.240982	0.281547		0.355429	0.0708646		0.0890193	0.126132		0.462986	0.441472
10	0.0781689	0.3822	0.27143	0.18453	0.256848	0.206434			0.117308	0.317058	0.358769	0.423713	0.419873	0.229676	0.213123	0.261766	0.386965	0.28974	0.116226	0.310616	0.210164	0.338481		0.426808	0.3179	0.137809	0.14789	0.24003	0.128797	0.105565	0.373133	0.192852			0.234903		0.12553	0.126116	0.224407	0.302862		0.30448	0.154011		0.0786196	0.113724		0.453965	0.512187
10.5	0.118808	0.434562	0.259649	0.222434	0.259679	0.22584			0.119197	0.293171	0.515961	0.528068	0.302078	0.302957	0.109309	0.25641	0.460329	0.214681	0.128367	0.382957	0.237296	0.267252		0.355259	0.235949	0.142053	0.172317	0.10829	0.115415	0.11202	0.369828	0.140704			0.270919		0.157692	0.12129	0.176928	0.263118		0.345431	0.12447		0.103356	0.167115		0.448195	0.48678
11	0.0814422	0.370344	0.239715	0.267074	0.287615	0.225561			0.157741	0.351346	0.288167	0.581864	0.357809	0.153554	0.304245	0.20129	0.538294	0.235309	0.229295	0.321574	0.267597	0.252886		0.242117	0.272696	0.110239	0.162541	0.22354	0.0690254	0.103733	0.465207	0.129723			0.329917		0.17099	0.103834	0.193677	0.28617		0.331224	0.0901121		0.158898	0.153867		0.423009	0.516743
11.5	0.109081	0.428921	0.235857	0.214865	0.350759	0.261654			0.188713	0.301954	0.465689	0.43829	0.411483	0.464516	0.239042	0.212099	0.549374	0.320053	0.143884	0.310146	0.2303	0.252405		0.336737	0.230415	0.121844	0.155908	0.243221	-0.0126243	0.122102	0.400009	0.175737			0.322566		0.166632	0.161566	0.18695	0.291586		0.349257	0.147215		0.120203	0.190602		0.425229	0.465405
12	0.106525	0.420228	0.240431	0.30247	0.265419	0.271729			0.153318	0.350278	0.378563	0.726462	0.370683	0.32232	0.0455915	0.330973	0.574439	0.296662	0.0927437	0.321455	0.253291	0.279051		0.266916	0.227248	0.140352	0.208788	0.0971927	0.0395259	0.126274	0.483026	0.127863			0.362719		0.244668	0.14965	0.221655	0.289517		0.368864	0.181478		0.189402	0.201678		0.500475	0.45914
12.5	0.0961031	0.397981	0.298121	0.270635	0.256765	0.248668			0.0510783	0.316354	0.307386	0.86782	0.386778	0.0426103	0.17703	0.198645	0.620038	0.328491	0.135887	0.241638	0.24578	0.254478		0.356116	0.406948	0.166283	0.19474	0.089197	-0.0051762	0.137195	0.425426	0.170741			0.417054		0.19563	0.176865	0.235999	0.276274		0.411397	0.21117		0.210597	0.202838		0.464031	0.473067
13	0.168135	0.460951	0.241477	0.272535	0.296674	0.246749			0.168821	0.239917	0.628478	0.415371	0.376978	0.217016	0.148817	0.27959	0.548774	0.273064	0.220105	0.269291	0.311986	0.187439		0.388627	0.332067	0.160267	0.201837	0.180013	0.04876	0.134063	0.404036	0.129433			0.355193		0.15372	0.144247	0.206546	0.275168		0.368806	0.158016		0.164487	0.228741		0.484571	0.449001
13.5	0.255416	0.36863	0.34439	0.240367	0.24126	0.223231			0.221415	0.243888	0.847376	0.49184	0.356926	0.200018	0.188989	0.254133	0.583442	0.274637	0.206878	0.344747	0.2663	0.177955		0.385136	0.373941	0.164408	0.172329	0.0901148	0.0589926	0.135544	0.430638	0.127641			0.378149		0.195906	0.107765	0.218593	0.281108		0.386404	0.0797358		0.132805	0.199883		0.458707	0.516195
14	0.219968	0.464256	0.26628	0.226438	0.228206	0.224945			0.189455	0.242667	0.549536	0.443371	0.403795	0.0705703	0.156216	0.226997	0.56396	0.26425	0.250494	0.248413	0.332716	0.208261		0.275028	0.433786	0.154613	0.205097	0.091514	0.0084722	0.146024	0.412671	0.190001			0.375429		0.245189	0.126751	0.28339	0.277282		0.359697	0.172245		0.12128	0.184285		0.46286	0.543329
14.5	0.21826	0.421986	0.366858	0.271212	0.300929	0.193356			0.1844	0.29218	0.450209	0.506949	0.434976	0.0165253	0.264258	0.369533	0.52999	0.333235	0.137255	0.338848	0.346215	0.271738		0.305681	0.479272	0.181282	0.184031	0.148404	0.017787	0.156788	0.430246	0.129582			0.345102		0.252972	0.131213	0.256549	0.303173		0.368861	0.140802		0.135856	0.257363		0.434559	0.50827
15	0.259902	0.412376	0.285301	0.231255	0.2811	0.205862			0.222119	0.246209	0.518479	0.271643	0.496908	0.192365	0.26682	0.387799	0.597022	0.352349	0.218486	0.32723	0.282927	0.219954		0.359926	0.494745	0.1671	0.191901	0.029091	-0.000186529	0.155235	0.416936	0.124848			0.398984		0.261467	0.16431	0.183152	0.286265		0.379047	0.198672		0.174774	0.231489		0.52111	0.497305
15.5	0.219978	0.520155	0.309735	0.146604	0.312506	0.244407			0.240387	0.369068	0.323055	0.195717	0.54202	0.337722	0.258135	0.356177	0.605671	0.385025	0.295799	0.279001	0.266906	0.320453		0.347416	0.353127	0.158755	0.191466	0.130866	-0.0218661	0.124247	0.380054	0.152376			0.375471		0.195924	0.149103	0.230621	0.298788		0.414931	0.174123		0.189073	0.153232		0.504503	0.54064
16	0.157196	0.486015	0.33868	0.188486	0.23287	0.262266			0.179654	0.297674	0.475359	0.328819	0.527136	0.254444	0.160979	0.434111	0.595605	0.404151	0.225332	0.307146	0.224019	0.284437		0.257593	0.371997	0.168196	0.199961	0.0727045	-0.000703528	0.122268	0.365153	0.177552			0.395618		0.270713	0.167998	0.25823	0.287118		0.394696	0.142685		0.167733	0.205498		0.438484	0.525384
16.5	0.271013	0.480479	0.291681	0.248557	0.286937	0.226452			0.293999	0.333162	0.294671	0.327575	0.615993	0.345665	0.203514	0.452907	0.560325	0.435049	0.264616	0.238	0.209348	0.30264		0.312306	0.28001	0.177481	0.17427	0.0871677	0.0825902	0.141076	0.563666	0.1457			0.413307		0.264854	0.176965	0.208978	0.298363		0.373798	0.222116		0.125789	0.242337		0.477364	0.614367
17	0.245523	0.519373	0.296112	0.379257	0.195964	0.324211			0.230617	0.31728	0.290324	0.413116	0.431161	0.390084	0.352139	0.300239	0.52756	0.354381	0.33479	0.315599	0.333489	0.217955		0.373805	0.25928	0.17158	0.16419	0.130961	0.00599093	0.170565	0.452956	0.150369			0.41899		0.2313	0.173103	0.225168	0.298695		0.388908	0.180693		0.175248	0.191893		0.48551	0.638592
17.5	0.279894	0.520999	0.401735	0.223999	0.241067	0.248132			0.263654	0.349255	0.375607	0.4048	0.530025	0.242862	0.112845	0.251619	0.559759	0.392662	0.31796	0.283604	0.33079	0.222209		0.222199	0.227816	0.127875	0.191841	0.0367914	0.0120534	0.152029	0.427822	0.1436			0.42031		0.230365	0.147342	0.290112	0.271684		0.381743	0.171208		0.107173	0.226768		0.452602	0.752714
18	0.183685	0.456564	0.257955	0.374534	0.233712	0.233522			0.320243	0.373434	0.570037	0.18545	0.441058	0.452386	0.264502	0.369167	0.585516	0.382962	0.305737	0.262309	0.280775	0.149973		0.169158	0.264948	0.123852	0.196269	0.177806	0.0399649	0.153445	0.408472	0.179808			0.430723		0.250072	0.16483	0.20916	0.280324		0.375353	0.174467		0.136967	0.238647		0.449361	0.675201
18.5	0.194922	0.500013	0.321061	0.373025	0.264953	0.302872			0.257059	0.332189	0.362546	0.275274	0.487168	0.353469	0.311237	0.35033	0.521299	0.380569	0.31443	0.267334	0.302051	0.12745		0.331305	0.298678	0.172166	0.179433	0.180994	-0.0189889	0.145457	0.453946	0.112178			0.387461		0.226682	0.191136	0.248738	0.270005		0.409525	0.189936		0.181187	0.221627		0.458833	0.653511
19	0.133284	0.545361	0.343099	0.37316	0.28777	0.244319			0.332218	0.378734	0.598267	0.0962244	0.348316	0.112398	0.316531	0.369093	0.51512	0.287779	0.274008	0.245337	0.315365	0.217644		0.255991	0.383189	0.173877	0.167533	0.114331	0.0192538	0.137497	0.393651	0.137961			0.379487		0.227113	0.15631	0.263749	0.273471		0.369665	0.15408		0.199897	0.282342		0.443367	0.669988
19.5	0.246106	0.542568	0.309923	0.328478	0.222909	0.272616			0.271486	0.35637	0.500362	0.385673	0.447486	0.511264	0.293726	0.340843	0.475836	0.372622	0.287663	0.243253	0.280407	0.181634		0.403103	0.34371	0.167635	0.174715	0.193393	-0.0032447	0.134306	0.385069	0.186491			0.375123		0.210038	0.17725	0.253469	0.318897		0.378032	0.245759		0.149942	0.245415		0.435754	0.63826
20	0.191324	0.529647	0.332974	0.366307	0.331675	0.290586			0.248868	0.319535	0.181238	0.179024	0.487039	0.145749	0.221642	0.224672	0.532903	0.386219	0.26032	0.229785	0.361518	0.194192		0.368129	0.348469	0.164983	0.180658	0.191056	0.0332436	0.145089	0.501064	0.177127			0.424086		0.185987	0.212033	0.214281	0.294547		0.366765	0.254715		0.171797	0.210996		0.45312	0.671141
20.5	0.237675	0.511767	0.351441	0.398835	0.341132	0.319808			0.318713	0.376127	0.518624	0.352768	0.319689	0.258066	0.23632	0.30907	0.499951	0.288705	0.31259	0.246294	0.289674	0.187605		0.340106	0.434792	0.18015	0.158414	0.286898	0.0635248	0.127643	0.437927	0.174476			0.392403		0.218929	0.239546	0.241036	0.307247		0.378744	0.268378		0.198814	0.222933		0.490705	0.644354
21	0.226389	0.547866	0.297492	0.317423	0.276193	0.276959			0.405827	0.405321	0.309811	0.41561	0.420658	0.235948	0.3098	0.365022	0.512369	0.346691	0.26668	0.286105	0.380715	0.184471		0.194643	0.311052	0.141581	0.16941	0.0954288	-0.0181977	0.112927	0.353247	0.179136			0.381176		0.241723	0.187788	0.238333	0.273329		0.404408	0.177307		0.13833	0.23442		0.460764	0.661354
21.5	0.194284	0.555255	0.462882	0.465087	0.246648	0.291532			0.313409	0.311888	0.226032	0.411363	0.417181	0.198612	0.33778	0.362374	0.511447	0.351249	0.311913	0.243179	0.392141	0.169279		0.148333	0.447441	0.111467	0.16675	0.22997	0.0570692	0.130633	0.402025	0.163047			0.378483		0.268893	0.197506	0.218175	0.311178		0.387216	0.207171		0.173448	0.203647		0.464654	0.68881
22	0.252798	0.46241	0.497499	0.402793	0.390056	0.310488			0.294196	0.359798	0.444623	0.389391	0.404158	0.481771	0.315598	0.336483	0.522672	0.347558	0.347106	0.20432	0.336598	0.204709		0.274912	0.425089	0.143515	0.147548	0.20096	0.0180991	0.129433	0.318641	0.192213			0.385294		0.264968	0.180331	0.237038	0.275577		0.363833	0.209837		0.155517	0.245381		0.488881	0.700347
22.5	0.171985	0.52975	0.50875	0.419293	0.355909	0.23002			0.322319	0.397455	0.418619	0.512797	0.562383	0.395222	0.298975	0.355724	0.498469	0.443414	0.367485	0.141759	0.451658	0.187481		0.28264	0.351654	0.162224	0.15965	0.0279096	0.0386977	0.152117	0.331481	0.145557			0.391437		0.273027	0.212047	0.182235	0.285589		0.381121	0.218208		0.153468	0.232912		0.483939	0.648201
23	0.199989	0.554174	0.44023	0.344065	0.409749	0.244203			0.364631	0.371452	0.39629	0.488792	0.437729	0.343075	0.268635	0.311547	0.510762	0.36702	0.434715	0.246445	0.351896	0.147367		0.326849	0.381036	0.154149	0.164801	0.108117	0.0667957	0.162499	0.275752	0.177627			0.405447		0.271399	0.131841	0.221041	0.283575		0.353236	0.168278		0.16598	0.264482		0.500954	0.624388
23.5	0.218489	0.561129	0.460338	0.383301	0.404819	0.300334			0.401	0.387681	0.598699	0.245982	0.422041	0.315074	0.263745	0.357252	0.505083	0.359263	0.311698	0.276579	0.388923	0.163232		0.21153	0.402161	0.12713	0.176827	-0.071011	0.0303776	0.135438	0.23382	0.188625			0.399716		0.287789	0.176988	0.219691	0.307287		0.38724	0.191899		0.156194	0.223077		0.493781	0.683826
24	0.174078	0.58077	0.36518	0.422494	0.383558	0.287008			0.459238	0.364447	0.182557	0.341167	0.483863	0.309431	0.2371	0.367367	0.476622	0.341292	0.331752	0.218293	0.387167	0.206743		0.342329	0.369768	0.125653	0.160179	0.0923317	0.0486071	0.139011	0.306531	0.224849			0.391058		0.298185	0.283859	0.235051	0.312931		0.384514	0.307453		0.166416	0.210057		0.568142	0.700036
24.5	0.195955	0.568827	0.393304	0.423839	0.393255	0.265037			0.364819	0.427485	0.35267	0.300285	0.360977	0.30565	0.32542	0.369795	0.506393	0.339711	0.377171	0.284913	0.454682	0.169898		0.20943	0.371045	0.115831	0.159592	0.00141788	-0.0354722	0.125334	0.264884	0.245281			0.402358		0.296843	0.26452	0.22387	0.265663		0.366217	0.284657		0.150929	0.215787		0.569117	0.69147
25	0.212572	0.564633	0.443953	0.387044	0.370184	0.284039			0.420796	0.398016	0.483797	0.234754	0.554638	0.41431	0.264002	0.322728	0.496309	0.450442	0.398349	0.236251	0.373381	0.126521		0.309778	0.347674	0.134353	0.201959	-0.0277057	0.0188451	0.162009	0.277632	0.264109			0.398608		0.311141	0.213433	0.233902	0.241301		0.351254	0.231114		0.203399	0.245879		0.606128	0.686845
25.5	0.254468	0.545379	0.385762	0.464344	0.397336	0.289913			0.378485	0.376453	0.248325	0.357145	0.42964	0.418444	0.288122	0.331181	0.507156	0.374508	0.442084	0.201537	0.489167	0.169896		0.380747	0.357994	0.16366	0.127659	0.058328	0.00336746	0.160315	0.330875	0.267928			0.409238		0.311339	0.261522	0.237885	0.179331		0.385387	0.273837		0.190998	0.262161		0.673312	0.651905
26	0.269377	0.580843	0.484556	0.349247	0.354368	0.306609			0.39393	0.459137	0.446505	0.301886	0.472581	0.136321	0.218605	0.277139	0.475014	0.401179	0.408203	0.215882	0.338956	0.178268		0.315282	0.396075	0.183681	0.186767	0.022068	0.0116764	0.172869	0.252112	0.25052			0.351831		0.294431	0.257527	0.232271	0.218881		0.382001	0.269548		0.196687	0.263027		0.696783	0.646787
26.5	0.221214	0.592278	0.421438	0.39258	0.341795	0.312368			0.443167	0.483995	0.300028	0.442367	0.520449	0.432661	0.279505	0.382782	0.4909	0.428296	0.417521	0.18192	0.456539	0.189749		0.42422	0.39457	0.181908	0.150305	0.0131755	-0.0163718	0.153318	0.283805	0.249382			0.364815		0.317117	0.230816	0.271858	0.34769		0.372126	0.24851		0.190282	0.22942		0.709355	0.671607
27	0.296972	0.594004	0.445871	0.425335	0.386887	0.349106			0.439123	0.397826	0.262955	0.405674	0.55353	0.516298	0.371855	0.373161	0.511184	0.437915	0.40071	0.211374	0.292062	0.252109		0.313758	0.252381	0.176774	0.159109	-0.124898	0.00307297	0.152841	0.260129	0.249769			0.389105		0.290337	0.233869	0.258327	0.180891		0.364932	0.268546		0.226187	0.221095		0.708675	0.672729
27.5	0.296906	0.563666	0.325676	0.390011	0.404089	0.305016			0.358269	0.432139	0.432335	0.348979	0.52797	0.282478	0.358849	0.357232	0.484523	0.410042	0.440808	0.194739	0.222615	0.11827		0.260644	0.275722	0.159166	0.158599	0.0143791	-0.038308	0.236625	0.218335	0.272421			0.40154		0.269913	0.232219	0.256537	0.277978		0.397669	0.254622		0.205947	0.252855		0.741548	0.641714
28	0.272701	0.587948	0.421438	0.386632	0.385057	0.299376			0.377892	0.482923	0.667437	0.544671	0.52024	0.443098	0.424288	0.381501	0.510063	0.474462	0.411392	0.224661	0.279555	0.160853		0.350536	0.379684	0.177256	0.116973	0.0751996	0.00973034	0.212379	0.224494	0.27361			0.365073		0.268749	0.199582	0.292929	0.209784		0.386078	0.207581		0.230657	0.214311		0.746702	0.76652
28.5	0.239969	0.59897	0.508757	0.374681	0.404132	0.314778			0.470974	0.552191	0.683768	0.490595	0.567875	0.220934	0.368386	0.383636	0.511948	0.434043	0.353214	0.199998	0.382944	0.12081		0.271009	0.297893	0.183247	0.142504	0.0174019	0.0429372	0.214688	0.277316	0.239463			0.354761		0.273054	0.235943	0.252615	0.0823658		0.392137	0.249821		0.178306	0.27667		0.663689	0.722055
29	0.267314	0.613183	0.564497	0.396388	0.406171	0.339175			0.421553	0.470747	0.656348	0.401153	0.457012	0.153613	0.415193	0.335658	0.538436	0.402707	0.419561	0.159423	0.208292	0.177868		0.255697	0.322961	0.176618	0.138141	0.0796499	0.00601306	0.162334	0.210045	0.2346			0.398814		0.285166	0.216386	0.251391	0.223967		0.362072	0.230779		0.276482	0.265615		0.742589	0.746838
29.5	0.269809	0.62449	0.494533	0.457112	0.390353	0.32842			0.415741	0.488581	0.392982	0.158276	0.469294	0.342449	0.332261	0.350815	0.50538	0.410148	0.43641	0.298117	0.327597	0.148868		0.299375	0.280013	0.177035	0.129019	0.128431	-0.0154764	0.195965	0.138453	0.245245			0.390447		0.267882	0.196179	0.282513	0.153999		0.391069	0.213291		0.251642	0.308839		0.723476	0.748948
30	0.28567	0.613669	0.488558	0.320351	0.387307	0.350598			0.360572	0.46556	0.616155	0.393833	0.512151	0.217265	0.422537	0.381565	0.544664	0.411027	0.452036	0.193702	0.313165	0.179614		0.310249	0.206082	0.127141	0.146141	0.0111892	-0.0113078	0.197708	0.118438	0.19225			0.392439		0.306225	0.230205	0.285065	0.202966		0.394526	0.294838		0.225293	0.290232		0.896339	0.732183
30.5	0.240137	0.588748	0.478314	0.396209	0.363625	0.319944			0.514797	0.434128	0.408883	0.467228	0.58169	0.426009	0.349956	0.355248	0.501274	0.488455	0.389235	0.2059	0.38199	0.241753		0.221134	0.221595	0.150365	0.110955	0.0441877	-0.0462054	0.207008	0.26597	0.212028			0.372626		0.294811	0.218303	0.248741	0.321778		0.374458	0.276073		0.256745	0.283056		0.793539	0.781593
31	0.263441	0.61541	0.44093	0.394287	0.336238	0.311091			0.561364	0.461886	0.599963	0.228744	0.460358	0.342452	0.395192	0.38276	0.565243	0.424882	0.335239	0.218795	0.353395	0.186284		0.276436	0.19529	0.174389	0.142396	-0.0845179	-0.0080334	0.21042	0.168299	0.224907			0.393119		0.294792	0.223644	0.291455	0.274159		0.383767	0.244444		0.252305	0.311048		0.872433	0.740968
31.5	0.298265	0.641155	0.50632	0.472024	0.299434	0.351093			0.437748	0.426897	0.481989	0.329275	0.470345	0.463236	0.447672	0.38553	0.528418	0.386282	0.321666	0.243329	0.335097	0.177885		0.328882	0.246787	0.127123	0.124193	0.178379	0.00202269	0.215368	0.237859	0.250797			0.374408		0.289787	0.239241	0.216886	0.217362		0.392175	0.30962		0.241883	0.280344		0.758744	0.755133
32	0.219016	0.624639	0.310225	0.415091	0.445669	0.333646			0.500478	0.40972	0.53196	0.304901	0.523008	0.417423	0.44515	0.38421	0.42903	0.431375	0.501088	0.242902	0.278357	0.278519		0.297179	0.185583	0.158281	0.167752	0.0763054	0.0103017	0.249136	0.302531	0.23647			0.309857		0.275466	0.217796	0.284882	0.251744		0.362969	0.288181		0.286073	0.297754		0.825743	0.777082
32.5	0.290528	0.639805	0.277307	0.365544	0.291792	0.335838			0.51065	0.359415	0.446712	0.324937	0.36866	0.563628	0.513615	0.388437	0.417488	0.351781	0.331254	0.238378	0.284191	0.208737		0.310275	0.174814	0.174132	0.152615	0.00768593	0.0550153	0.217881	0.250763	0.226936			0.288379		0.28478	0.264922	0.301444	0.289365		0.379705	0.301851		0.267472	0.269783		0.871465	0.706447
33	0.191264	0.605563	0.501216	0.458736	0.4888	0.350065			0.421195	0.201682	0.454055	0.287726	0.487791	0.329049	0.520932	0.403247	0.442336	0.395737	0.411446	0.173685	0.23307	0.263025		0.302871	0.190979	0.189387	0.195282	0.111131	0.0093783	0.232995	0.104595	0.283281			0.330913		0.298209	0.26425	0.260203	0.215694		0.367768	0.357792		0.244647	0.285306		0.851925	0.708854
33.5	0.309257	0.63314	0.492824	0.421755	0.391036	0.301502			0.428701	0.234842	0.476618	0.265491	0.460159	0.37051	0.359831	0.38136	0.442633	0.367553	0.417793	0.186528	0.340187	0.21441		0.222235	0.245689	0.175615	0.149532	-0.0549748	0.0302492	0.211312	0.210759	0.234254			0.336047		0.302616	0.282349	0.272845	0.254531		0.348906	0.318672		0.251208	0.346016		0.883286	0.704166
34	0.371218	0.55451	0.492103	0.478815	0.387698	0.345978			0.527887	0.269984	0.669397	0.488768	0.457137	0.51527	0.558908	0.374778	0.44418	0.428634	0.355897	0.216744	0.299422	0.315292		0.284771	0.150917	0.166814	0.114363	-0.046755	0.0517614	0.203687	0.0832023	0.291022			0.306792		0.298915	0.314872	0.303141	0.18353		0.381424	0.314186		0.310887	0.329524		0.789639	0.733978
34.5	0.287002	0.595645	0.493271	0.469996	0.422777	0.376756			0.50967	0.203312	0.592889	0.213967	0.512253	0.482739	0.430511	0.391	0.416505	0.397295	0.445725	0.236561	0.246811	0.297175		0.286185	0.250971	0.162175	0.113456	0.00443481	0.0438268	0.20402	0.154398	0.273652			0.323978		0.292087	0.302685	0.284372	0.143275		0.361149	0.382602		0.338152	0.312523		0.867249	0.728495
35	0.269252	0.626069	0.487823	0.464234	0.357255	0.385259			0.41397	0.263791	0.517819	0.297571	0.512049	0.556921	0.462881	0.392882	0.472483	0.428259	0.375641	0.21113	0.271306	0.274172		0.34174	0.195032	0.126481	0.128764	-0.071557	-0.00965739	0.192587	0.162738	0.242426			0.328646		0.304521	0.278946	0.369676	0.229385		0.37897	0.358282		0.315933	0.308957		0.845	0.810127
35.5	0.331756	0.649172	0.494875	0.484454	0.429308	0.441111			0.482758	0.268196	0.515573	0.275742	0.474803	0.294676	0.303853	0.393857	0.426967	0.401668	0.396809	0.188457	0.260082	0.264198		0.2211	0.114527	0.14512	0.107601	-0.0081771	0.00243126	0.225478	0.157136	0.266575			0.319218		0.325543	0.218666	0.294635	0.245136		0.344454	0.249143		0.291531	0.291482		0.907635	0.746028
36	0.305968	0.523675	0.501251	0.519552	0.300738	0.35417			0.509387	0.326159	0.639782	0.475429	0.440171	0.598593	0.419474	0.371643	0.478453	0.346418	0.478276	0.171139	0.246457	0.371953		0.213472	0.119466	0.154829	0.179423	0.13413	0.0503154	0.249074	0.28087	0.254959			0.346336		0.294126	0.273717	0.333084	0.268456		0.348817	0.343751		0.271042	0.315217		0.90043	0.725241
36.5	0.396678	0.549384	0.448065	0.494505	0.381098	0.343936			0.458936	0.228711	0.510018	0.133642	0.47846	0.319038	0.373569	0.350157	0.420763	0.380538	0.483685	0.20559	0.27284	0.246377		0.28868	0.234482	0.197863	0.183664	0.151734	0.125608	0.252942	0.263156	0.263674			0.304227		0.293715	0.225231	0.277113	0.180757		0.357043	0.288695		0.286137	0.296006		0.865751	0.677425
37	0.266304	0.556675	0.435847	0.517907	0.441393	0.363145			0.481	0.357975	0.438277	0.327305	0.585127	0.588836	0.500031	0.332591	0.403489	0.428582	0.378918	0.236557	0.286002	0.332337		0.314186	0.130495	0.14621	0.151229	0.265626	0.127025	0.243973	0.264357	0.291416			0.315545		0.275015	0.217856	0.265791	0.151225		0.353103	0.252165		0.291556	0.283039		0.859705	0.666601
37.5	0.367999	0.607546	0.491015	0.498109	0.414419	0.354793			0.521671	0.316751	0.231146	0.222392	0.57298	0.309601	0.407897	0.315945	0.381978	0.485642	0.431386	0.18842	0.280046	0.338253		0.259214	0.226361	0.189308	0.202908	0.233555	0.107966	0.25545	0.265962	0.287408			0.306471		0.277871	0.175868	0.283436	0.155473		0.322607	0.235902		0.304683	0.313857		0.81575	0.755519
38	0.409082	0.502921	0.40017	0.471519	0.444506	0.337214			0.497365	0.380767	0.505091	0.323114	0.452321	0.190025	0.391591	0.370933	0.436613	0.355265	0.453362	0.255805	0.209656	0.332075		0.297453	0.17345	0.19811	0.218967	0.145673	0.125467	0.270167	0.262683	0.254784			0.314454		0.264376	0.254446	0.308646	0.281462		0.366577	0.257802		0.262315	0.338724		0.837808	0.717003
38.5	0.365216	0.449396	0.301444	0.403873	0.433782	0.374457			0.381663	0.398547	0.465052	0.360901	0.490189	0.286018	0.30347	0.309373	0.453649	0.401907	0.413259	0.216869	0.2651	0.291246		0.275343	0.210316	0.21785	0.205896	0.156254	0.126977	0.262512	0.288351	0.296231			0.323031		0.25063	0.202502	0.295151	0.238774		0.365218	0.274171		0.307032	0.339361		0.872371	0.706294
39	0.438943	0.442491	0.381444	0.418534	0.401239	0.3936			0.463438	0.350601	0.0829329	0.309349	0.499104	0.351696	0.416017	0.288484	0.39733	0.379322	0.381527	0.228452	0.244802	0.289976		0.254899	0.26705	0.210505	0.198531	0.199213	0.139538	0.265255	0.303683	0.326842			0.331392		0.293326	0.276361	0.283307	0.14769		0.338202	0.332145		0.345778	0.340035		0.856037	0.755811
39.5	0.420337	0.426804	0.333957	0.48902	0.33892	0.36807			0.424652	0.396368	0.470305	0.47876	0.440247	0.442029	0.363595	0.337663	0.438053	0.408412	0.399036	0.219778	0.259989	0.319261		0.17996	0.189005	0.194112	0.155773	0.0989381	0.151823	0.224428	0.222331	0.288624			0.350522		0.303382	0.232864	0.307045	0.211644		0.331357	0.312567		0.359097	0.353292		0.85712	0.791006
[truncated: 84 more columns]
