# Supplementary material for: Polo-like kinase-dependent phosphorylation of the synaptonemal complex protein SYP-4 regulates double-strand break formation through a negative feedback loop
Source: eLife. 2017 Mar 27;6:e23437. doi: 10.7554/eLife.23437 (PMC5423773; doi:10.7554/eLife.23437)
Supplement: Figure 6—source data 2. — DOI: http://dx.doi.org/10.7554/eLife.23437.020 [file elife-23437-fig6-data2.xlsx]

## Sheet: MP-wt1
Background		WT-MP_n1	WT-MP_n2	WT-MP_n3	WT-MP_n4	WT-MP_n5	WT-MP_n6	WT-MP_n7	WT-MP_n8	WT-MP_n9	WT-MP_n10	Unfrapped nuclei		WT-MP_n1	WT-MP_n2	WT-MP_n3	WT-MP_n4	WT-MP_n5	WT-MP_n6	WT-MP_n7	WT-MP_n8	WT-MP_n9	WT-MP_n10	Unfrapped nuclei		ROI2			WT-MP_n1	WT-MP_n2	WT-MP_n3	WT-MP_n4	WT-MP_n5	WT-MP_n6	WT-MP_n7	WT-MP_n8	WT-MP_n9	WT-MP_n10			WT-MP_n1	WT-MP_n2	WT-MP_n3	WT-MP_n4	WT-MP_n5	WT-MP_n6	WT-MP_n7	WT-MP_n8	WT-MP_n9
965.586		1015.64	1012.13	1016.68	1019.54	1020.37	1021.86	1001.62	1015.39	1014.11	1016.02	1002.77		50.0571	46.5412	51.0979	53.9534	54.7886	56.2785	36.0377	49.8048	48.5283	50.4341	37.1862		0.99277			0.961877	0.956105	0.961446	1.0857	1.01796	1.00731	0.970344	0.96283	1.01478	1.0094			0.946358	0.945031	0.95205	1.11769	1.02121	1.00986	0.93215	0.944333	1.02089
965.497		1018.77	1015.61	1019.92	1010.21	1017.57	1020.15	1003.2	1018.4	1011.92	1014.27	1002.15		53.2725	50.1108	54.4275	44.7174	52.0766	54.6543	37.7035	52.9023	46.4236	48.7721	36.6484		1.00734			1.03868	1.04454	1.03912	0.913045	0.981772	0.992587	1.03009	1.03772	0.985007	0.99046			1.05443	1.05578	1.04865	0.880586	0.978474	0.989994	1.06885	1.05648	0.978801
965.115		979.393	974.414	974.991	977.924	972.934	978.846	984.94	981.414	978.392	978.377	1000.38		14.2776	9.29951	9.87601	12.8094	7.81931	13.7314	19.8253	16.2989	13.2768	13.2624	35.2634		1.0469			0.289312	0.201458	0.195957	0.271816	0.153203	0.259173	0.562918	0.332272	0.292769	0.27991			0	0	0	0	0	0	0	0	0
964.962		978.287	974.841	979.1	974.368	973.036	977.016	983.66	981.072	978.95	977.244	999.907		13.3252	9.87901	14.1382	9.40651	8.07381	12.0547	18.6983	16.1103	13.9885	12.2824	34.9448		1.05645			0.272475	0.215963	0.283083	0.201427	0.159632	0.229601	0.535758	0.331421	0.311275	0.26159			-0.0236911	0.0181644	0.108361	-0.096665	0.00759172	-0.0399182	-0.062138	-0.00127369	0.026167
965.284		976.86	976.98	977.057	974.999	975.359	978.583	982.555	980.262	978.13	978.296	999.5		11.5758	11.696	11.7732	9.71505	10.0753	13.2993	17.2711	14.9783	12.8461	13.0126	34.2159		1.07895			0.241746	0.261132	0.240753	0.212466	0.203449	0.258704	0.505409	0.314699	0.291945	0.283047			-0.0669283	0.074729	0.0557138	-0.0815054	0.0593367	-0.000634097	-0.131574	-0.0263169	-0.00116498
964.685		977.363	974.776	977.478	978.209	974.471	978.833	982.074	977.088	980.34	979.686	998.917		12.678	10.0909	12.7932	13.5244	9.78579	14.1481	17.3897	12.4028	15.6556	15.001	34.2318		1.07845			0.26464	0.22519	0.261488	0.295637	0.19751	0.275085	0.508641	0.260465	0.355628	0.326145			-0.0347152	0.0297188	0.0815023	0.0327123	0.0523232	0.0214788	-0.12418	-0.107539	0.0888798
964.453		978.602	976.846	974.234	981.616	973.778	977.57	983.374	981.787	978.363	978.229	998.956		14.1489	12.3932	9.78081	17.1631	9.32501	13.1171	18.9208	17.334	13.9102	13.7754	34.5031		1.06997			0.293022	0.274394	0.198344	0.372228	0.18673	0.253034	0.549074	0.36116	0.313496	0.297144			0.00522028	0.0913364	0.00296949	0.137893	0.0395929	-0.00828654	-0.0316728	0.0432642	0.0293066
964.553		979.291	976.656	976.073	981.027	974.586	978.463	984.507	977.098	977.094	981.518	998.832		14.7384	12.103	11.5204	16.4743	10.0331	13.9107	19.9542	12.5453	12.5413	16.9658	34.2791		1.07696			0.307225	0.26972	0.235148	0.359624	0.202222	0.270097	0.582847	0.263094	0.284492	0.368355			0.0252052	0.085483	0.0487428	0.120585	0.057888	0.014745	0.0455965	-0.103601	-0.0117042
964.753		981.092	976.539	977.873	979.1	976.924	981.764	983.146	978.518	979.056	981.507	998.599		16.339	11.7862	13.1204	14.3471	12.171	17.0112	18.3939	13.7649	14.3035	16.7545	33.8469		1.09072			0.34494	0.266015	0.271227	0.317189	0.248446	0.334516	0.544134	0.292358	0.32861	0.368413			0.0782733	0.0808433	0.0936147	0.0623091	0.112475	0.101701	-0.0429756	-0.0597752	0.0506781
964.253		977.776	974.775	979.267	982.452	976.425	978.307	982.386	976.777	980.097	983.196	998.659		13.5233	10.522	15.014	18.1988	12.1717	14.0535	18.1334	12.5236	15.8437	18.9427	34.4056		1.073			0.280859	0.233624	0.30533	0.395808	0.244425	0.271866	0.527715	0.261673	0.358083	0.409764			-0.0118936	0.0402813	0.13603	0.170275	0.107726	0.0171331	-0.0805406	-0.105729	0.0923511
964.427		979.814	977.996	979.398	981.974	975.936	981.151	985.729	977.072	978.55	983.504	998.388		15.3871	13.5691	14.9711	17.5475	11.5094	16.7245	21.3016	12.6455	14.1235	19.0766	33.9611		1.08705			0.32375	0.305223	0.308442	0.386638	0.23415	0.327771	0.628029	0.267678	0.323382	0.418061			0.0484573	0.129943	0.1399	0.157682	0.0955915	0.0925962	0.148968	-0.0967364	0.0432857
964.54		979.247	977.385	979.511	983.446	977.828	981.384	985.474	979.658	980.327	984.806	998.274		14.7066	12.8452	14.9707	18.9061	13.2881	16.8432	20.9341	15.1179	15.7867	20.2659	33.7332		1.09439			0.311523	0.290893	0.310519	0.419388	0.272163	0.332328	0.621364	0.322176	0.363907	0.447126			0.0312532	0.111997	0.142482	0.202657	0.140482	0.0987475	0.13372	-0.015119	0.100586
964.483		980.638	979.985	983.25	984.443	977.028	981.902	984.941	978.502	980.867	984.643	998.214		16.1543	15.5021	18.7667	19.9601	12.5446	17.4189	20.4581	14.0185	16.3842	20.1599	33.7309		1.09447			0.342213	0.351085	0.389281	0.442799	0.256953	0.343711	0.607278	0.298768	0.377706	0.444818			0.0744361	0.187375	0.24044	0.234807	0.12252	0.114112	0.101491	-0.050176	0.120098
964.456		978.91	981.193	979.47	984.058	979.272	981.144	986.726	979.656	982.739	985.621	998.369		14.4548	16.738	15.0145	19.603	14.8167	16.6887	22.2705	15.2007	18.2832	21.1656	33.9134		1.08858			0.304562	0.377034	0.309772	0.432536	0.301859	0.32753	0.657519	0.322219	0.419215	0.464494			0.0214584	0.219871	0.141554	0.220713	0.17555	0.0922705	0.216437	-0.0150547	0.17879
964.573		981.851	983.695	979.335	984.63	980.492	980.315	985.079	979.638	980.399	984.29	998.075		17.278	19.1222	14.7624	20.057	15.9199	15.7427	20.506	15.0656	15.8262	19.7174	33.5023		1.10193			0.368514	0.436026	0.308309	0.447984	0.328314	0.312756	0.612853	0.323275	0.367332	0.438022			0.111445	0.293746	0.139734	0.241928	0.206792	0.0723275	0.114246	-0.013474	0.105429
964.741		979.487	981.956	979.923	983.648	978.415	981.515	986.039	978.551	981.144	985.653	998.148		14.7467	17.215	15.1823	18.907	13.6748	16.7739	21.2987	13.8106	16.4035	20.9124	33.4073		1.10507			0.31542	0.393655	0.31798	0.4235	0.282816	0.33419	0.638355	0.297188	0.381815	0.465891			0.0367372	0.240685	0.151763	0.208304	0.153063	0.101261	0.172592	-0.0525412	0.125907
964.633		982.893	984.649	983.823	984.711	979.937	985.926	984.532	979.808	984.188	983.022	997.583		18.2596	20.0158	19.1898	20.0782	15.3038	21.2931	19.899	15.175	19.555	18.3891	32.9495		1.12042			0.395983	0.464058	0.407497	0.455981	0.320903	0.43012	0.604688	0.331084	0.461493	0.415367			0.150096	0.32885	0.263095	0.25291	0.19804	0.230751	0.0955669	-0.00177826	0.238569
964.466		980.13	985.498	981.474	983.513	978.943	983.921	986.264	977.507	980.816	984.703	997.657		15.6643	21.0317	17.0079	19.0468	14.4768	19.4549	21.7976	13.0412	16.3501	20.2365	33.1911		1.11227			0.337228	0.484062	0.358535	0.429409	0.301352	0.390127	0.657561	0.282458	0.383049	0.453768			0.0674223	0.3539	0.202201	0.216418	0.174952	0.176767	0.216534	-0.0746014	0.127652
964.325		980.699	983.712	981.337	983.637	981.108	984.29	986.981	982.001	980.979	986.564	997.411		16.3737	19.3863	17.0117	19.3115	16.7831	19.9649	22.6557	17.676	16.6539	22.2384	33.0854		1.11582			0.353628	0.447619	0.359762	0.436769	0.350478	0.401635	0.685633	0.384068	0.391415	0.500252			0.0904988	0.308263	0.203727	0.226526	0.232966	0.192301	0.28076	0.077571	0.139481
964.403		983.912	987.508	984.418	984.856	981.573	984.583	983.211	982.605	982.259	986.669	997.263		19.5089	23.1052	20.0152	20.4529	17.1701	20.1803	18.8079	18.2024	17.8564	22.2661	32.8604		1.12346			0.424224	0.537138	0.426177	0.46575	0.361013	0.408747	0.573082	0.398213	0.422549	0.504304			0.189833	0.420366	0.286328	0.266326	0.245408	0.201901	0.0232553	0.0987542	0.183504
964.412		982.835	983.846	982.685	981.904	981.617	984.527	985.572	979.078	982.056	985.804	997.303		18.4225	19.4336	18.273	17.4918	17.2046	20.1153	21.1599	14.6656	17.6436	21.3921	32.8906		1.12243			0.400232	0.451368	0.388723	0.397955	0.361407	0.407056	0.644156	0.320544	0.41713	0.484064			0.156074	0.312957	0.239747	0.173223	0.245872	0.199619	0.185866	-0.0175638	0.175842
964.25		981.049	986.095	980.946	981.143	981.766	987.086	986.043	979.356	983.24	985.528	997.426		16.7989	21.8446	16.6959	16.8933	17.5158	22.8358	21.7932	15.106	18.9904	21.278	33.1763		1.11276			0.361817	0.502998	0.352116	0.38103	0.364777	0.458131	0.657724	0.327327	0.445106	0.477337			0.102022	0.377613	0.194218	0.149981	0.249851	0.268561	0.216907	-0.00740459	0.215399
964.297		980.782	985.949	983.791	982.485	981.908	984.96	984.771	979.321	980.683	986.845	997.339		16.4852	21.6523	19.4938	18.1874	17.6105	20.6628	20.4742	15.0235	16.3862	22.548	33.0422		1.11728			0.356501	0.500593	0.412792	0.411883	0.368237	0.416218	0.620423	0.32686	0.385626	0.507879			0.0945415	0.374601	0.269681	0.19235	0.253938	0.211985	0.131567	-0.00810399	0.131296
964.12		981.834	987.461	983.174	983.429	981.824	985.432	983.856	980.754	980.544	985.936	996.64		17.714	23.3411	19.0544	19.3096	17.7043	21.3128	19.7362	16.6347	16.4249	21.8167	32.5204		1.13521			0.38922	0.548295	0.40996	0.444312	0.376137	0.436198	0.607655	0.367721	0.392738	0.499291			0.14058	0.434337	0.266159	0.236885	0.263267	0.238956	0.102353	0.0530888	0.141352
963.747		980.428	985.135	982.208	984.534	982.651	985.192	983.778	981.7	981.365	987.454	996.298		16.6816	21.3887	18.4615	20.7873	18.9045	21.4452	20.0319	17.9533	17.6189	23.7075	32.5517		1.13411			0.366183	0.501949	0.396822	0.477854	0.40125	0.438486	0.616166	0.396487	0.420882	0.542042			0.108165	0.376299	0.249819	0.282947	0.292923	0.242044	0.121826	0.0961705	0.181148
963.783		981.442	987.262	982.237	983.131	985.287	986.642	986.308	982.189	982.406	986.169	996.683		17.659	23.4796	18.4543	19.3481	21.5046	22.8591	22.5256	18.4068	18.6237	22.3859	32.9006		1.12209			0.383528	0.545175	0.392461	0.440054	0.451597	0.46244	0.685523	0.402192	0.440168	0.506398			0.132571	0.430431	0.244395	0.231037	0.35238	0.274378	0.280509	0.104714	0.208417
963.799		981.183	986.732	982.212	985.568	981.771	986.751	986.61	982.993	981.223	987.379	996.424		17.3835	22.9333	18.4128	21.7688	17.9719	22.9515	22.8105	19.1941	17.4239	23.58	32.6253		1.13156			0.380731	0.536985	0.394883	0.499289	0.380596	0.468228	0.700053	0.422935	0.415287	0.537912			0.128635	0.420174	0.247408	0.312383	0.268533	0.282191	0.313751	0.135778	0.173235
963.77		980.736	985.848	984.14	984.461	981.307	985.798	984.938	978.698	978.245	986.207	996.523		16.9657	22.0782	20.3699	20.6909	17.5365	22.0284	21.1678	14.928	14.475	22.4364	32.7524		1.12716			0.370137	0.514954	0.435158	0.472722	0.369932	0.44765	0.647114	0.327654	0.343661	0.509835			0.113728	0.392585	0.297498	0.2759	0.25594	0.254414	0.192632	-0.00691478	0.0719588
963.715		983.102	988.124	982.275	984.707	983.007	985.936	985.679	981.843	981.679	984.118	996.314		19.3874	24.409	18.5602	20.992	19.2919	22.2211	21.9642	18.1287	17.9646	20.4029	32.5988		1.13247			0.424964	0.572	0.398366	0.481861	0.40888	0.453694	0.674625	0.399782	0.42852	0.465811			0.190874	0.464024	0.25174	0.288451	0.301934	0.262572	0.255574	0.101104	0.191947
963.708		985.848	985.139	986.053	983.781	980.896	985.172	987.085	982.025	983.209	984.287	996.638		22.1404	21.4316	22.3451	20.073	17.1883	21.4638	23.3768	18.317	19.5007	20.5787	32.9304		1.12107			0.480423	0.49717	0.474774	0.456128	0.360627	0.433819	0.710785	0.399867	0.460477	0.465094			0.268911	0.370315	0.346769	0.253112	0.244951	0.235744	0.338305	0.101231	0.237133
963.853		984.624	988.119	983.111	983.248	980.317	985.097	987.968	982.407	982.209	984.128	996.288		20.7711	24.2663	19.2581	19.3954	16.4639	21.2443	24.1149	18.5536	18.3561	20.2755	32.4349		1.1382			0.457595	0.57153	0.415435	0.447463	0.350706	0.435942	0.744426	0.41122	0.440072	0.465242			0.236789	0.463435	0.272968	0.241211	0.233235	0.23861	0.415274	0.118234	0.208281
963.735		984.41	986.576	986.546	984.428	982.951	983.851	987.001	979.884	981.911	985.437	996.116		20.6744	22.8412	22.8108	20.6925	19.2161	20.1159	23.2663	16.149	18.1759	21.7018	32.3807		1.1401			0.456227	0.538867	0.492898	0.478187	0.410017	0.413478	0.719433	0.358524	0.436481	0.498804			0.234865	0.422531	0.36931	0.283404	0.303277	0.208287	0.358091	0.0393158	0.203204
963.765		985.611	986.194	983.573	983.176	982.139	984.218	987.297	982.808	982.906	984.012	996.089		21.846	22.4293	19.8084	19.4115	18.3744	20.4537	23.5322	19.0429	19.141	20.2471	32.3247		1.14208			0.482916	0.530067	0.428762	0.44936	0.392736	0.421149	0.728914	0.423503	0.460453	0.466174			0.272418	0.411512	0.289544	0.243817	0.28287	0.218642	0.379783	0.13663	0.237099
963.605		984.398	989.718	984.441	980.626	983.328	985.541	987.438	982.904	983.403	987.666	996.096		20.7933	26.1133	20.8362	17.021	19.723	21.9359	23.8332	19.2992	19.798	24.0614	32.4915		1.13621			0.457287	0.613961	0.448695	0.392	0.419398	0.449351	0.73445	0.427001	0.473814	0.551153			0.236355	0.51657	0.314335	0.165046	0.314355	0.25671	0.392447	0.141868	0.255991
963.279		982.273	988.438	985.291	981.672	980.045	985.971	986.103	983.073	981.495	985.353	995.827		18.994	25.1592	22.0124	18.3931	16.7661	22.6928	22.8242	19.7948	18.2163	22.074	32.5484		1.13423			0.416987	0.590496	0.473196	0.422861	0.355899	0.464044	0.702128	0.437201	0.435199	0.504746			0.17965	0.487185	0.344807	0.207426	0.239368	0.276543	0.318498	0.157144	0.20139
963.565		985.724	988.17	983.579	983.47	982.142	984.699	986.509	980.595	984.676	986.358	995.681		22.1591	24.6051	20.0138	19.9051	18.5771	21.1335	22.9439	17.0301	21.1106	22.7925	32.1155		1.14952			0.493029	0.585274	0.436031	0.463789	0.399656	0.437982	0.715322	0.381208	0.511142	0.528199			0.286647	0.480646	0.298584	0.263632	0.291041	0.241364	0.348686	0.0732872	0.308772
963.466		984.717	989.163	983.509	987.106	978.479	987.776	986.517	984.22	982.699	985.648	995.378		21.2506	25.6967	20.0428	23.6402	15.0129	24.31	23.051	20.7541	19.2324	22.1814	31.9113		1.15687			0.47584	0.61515	0.439456	0.554341	0.325044	0.507037	0.723259	0.467539	0.468645	0.517326			0.262461	0.518059	0.302844	0.387985	0.20293	0.334576	0.366844	0.202578	0.248682
963.315		985.704	989.184	987.198	982.456	980.114	985.149	986.457	982.242	983.55	986.542	995.731		22.3891	25.8688	23.8832	19.1414	16.7992	21.8344	23.1417	18.9273	20.2351	23.2271	32.4164		1.13885			0.493522	0.609622	0.515502	0.441855	0.358053	0.448308	0.714792	0.419743	0.485396	0.533275			0.287342	0.511136	0.397423	0.233511	0.241911	0.255302	0.347474	0.130998	0.272368
963.347		982.731	987.022	982.038	986.842	979.786	984.58	986.096	983.5	985.04	987.17	995.279		19.3839	23.6746	18.6905	23.4945	16.4384	21.2328	22.7486	20.1526	21.6925	23.8225	31.9312		1.15615			0.433772	0.566391	0.409552	0.550582	0.355687	0.44258	0.713328	0.453707	0.528264	0.555256			0.203268	0.457	0.265651	0.382824	0.239118	0.247571	0.344123	0.181863	0.332981
963.495		983.079	988.388	984.267	986.781	980.993	986.911	985.794	980.548	983.31	985.95	995.279		19.5838	24.893	20.7716	23.2855	17.4979	23.4157	22.2982	17.0521	19.8147	22.4543	31.7834		1.16153			0.440284	0.59831	0.457271	0.548223	0.380373	0.490351	0.702457	0.38569	0.484779	0.525801			0.212431	0.496971	0.325	0.379584	0.26827	0.312054	0.319252	0.0799996	0.271496
963.163		981.104	989.797	984.949	986.714	981.725	984.851	986.865	983.308	985.276	987.24	995.24		17.941	26.6338	21.7862	23.5511	18.5621	21.6879	23.7022	20.1448	22.1131	24.0773	32.0777		1.15087			0.399649	0.634277	0.475205	0.549388	0.399805	0.450002	0.739836	0.45146	0.536047	0.558632			0.155254	0.542012	0.347306	0.381184	0.291217	0.257589	0.40477	0.178499	0.343987
963.564		984.672	989.806	983.94	985.537	979.477	985.957	987.276	983.954	983.768	986.717	995.299		21.108	26.2421	20.3759	21.9731	15.9128	22.3926	23.712	20.3895	20.2035	23.1525	31.7349		1.1633			0.475275	0.631699	0.449244	0.518114	0.346444	0.469642	0.748136	0.461879	0.495046	0.542977			0.261666	0.538783	0.315017	0.338235	0.228202	0.2841	0.42376	0.194103	0.286012
963.381		982.852	989.212	984.565	986.464	983.383	986.378	985.648	984.146	982.967	985.461	994.816		19.471	25.8302	21.1835	23.0822	20.0014	22.9964	22.2661	20.7642	19.5857	22.0798	31.4341		1.17443			0.442611	0.627734	0.471519	0.549474	0.439626	0.486921	0.709239	0.474869	0.484501	0.522775			0.215706	0.533818	0.342721	0.381302	0.338242	0.307424	0.334768	0.213555	0.271102
962.883		984.177	988.674	985.172	987.424	983.667	987.365	986.972	981.894	984.827	987.109	995.227		21.2938	25.7911	22.2891	24.5408	20.7844	24.4822	24.0892	19.0116	21.9441	24.2257	32.3444		1.14138			0.470425	0.609145	0.482167	0.567756	0.44398	0.503793	0.745717	0.422552	0.527565	0.557441			0.254842	0.510539	0.355964	0.406408	0.343384	0.330198	0.418225	0.135205	0.331993
963.424		983.767	989.608	983.193	984.887	981.186	985.769	987.249	983.256	987.091	987.791	994.958		20.3424	26.1837	19.7687	21.4627	17.7618	22.3447	23.825	19.832	23.6663	24.3663	31.5334		1.17074			0.460965	0.634322	0.438643	0.509314	0.389171	0.471633	0.756506	0.452123	0.583602	0.575096			0.24153	0.542068	0.301833	0.326151	0.27866	0.286788	0.442911	0.17949	0.411227
962.919		982.667	989.822	988.903	989.148	979.886	986.169	986.829	984.577	984.473	984.987	995.11		19.7475	26.9021	25.9836	26.2287	16.9666	23.2496	23.9099	21.6575	21.5532	22.0673	32.1909		1.14682			0.438342	0.638412	0.564766	0.609697	0.364153	0.480708	0.743692	0.483653	0.520636	0.510195			0.209699	0.54719	0.458693	0.464005	0.249115	0.299037	0.413594	0.226711	0.322195
963.007		984.54	986.946	990.241	987.414	985.438	986.922	987.936	984.547	984.05	986.505	995.135		21.5331	23.939	27.2344	24.4076	22.4309	23.9157	24.9296	21.5408	21.0436	23.498	32.1281		1.14907			0.478914	0.569208	0.593112	0.568476	0.482376	0.495449	0.776928	0.481989	0.509321	0.544337			0.266787	0.460526	0.493947	0.407396	0.388728	0.318935	0.489633	0.224219	0.306197
963.422		982.107	988.971	990.464	987.786	984.104	984.151	987.426	984.477	984.775	987.502	994.818		18.685	25.5488	27.0423	24.3645	20.682	20.7295	24.0044	21.0552	21.3533	24.0801	31.3966		1.17584			0.42525	0.621635	0.602647	0.580691	0.455127	0.439445	0.76552	0.482097	0.528856	0.570815			0.191277	0.526181	0.505806	0.424171	0.356548	0.243339	0.463534	0.224381	0.333818
963.037		982.725	989.592	987.926	985.419	985.924	984.428	987.739	985.571	985.735	986.578	994.735		19.6877	26.5546	24.889	22.382	22.8874	21.3914	24.7019	22.5337	22.6979	23.5409	31.6984		1.16464			0.443805	0.639958	0.54938	0.528363	0.498864	0.449161	0.780266	0.511039	0.556807	0.552722			0.217386	0.549125	0.439558	0.352311	0.408199	0.256453	0.49727	0.267725	0.37334
963.213		983.315	989.808	988.632	986.584	985.762	986.33	987.648	983.422	986.741	987.063	994.494		20.1024	26.5946	25.4191	23.371	22.5489	23.1168	24.4354	20.2087	23.5286	23.85	31.2808		1.18019			0.459204	0.649479	0.568572	0.559077	0.498049	0.49187	0.782153	0.46443	0.584891	0.567456			0.239053	0.561049	0.463428	0.394489	0.407235	0.314104	0.501589	0.197923	0.41305
962.933		982.109	990.71	985.504	987.95	985.139	986.074	988.062	984.915	988.557	986.592	994.789		19.1752	27.7766	22.5705	25.0162	22.206	23.141	25.1288	21.9815	25.623	23.6582	31.8558		1.15889			0.430118	0.666101	0.495743	0.587631	0.481622	0.483498	0.78983	0.496054	0.625458	0.552732			0.198126	0.581864	0.372848	0.433702	0.387837	0.302802	0.519152	0.245283	0.470411
963.305		982.762	990.173	986.422	987.882	985.448	985.271	985.92	985.066	985.88	988.332	994.688		19.4571	26.868	23.1169	24.577	22.1431	21.9657	22.6154	21.7607	22.575	25.0269	31.3824		1.17637			0.443024	0.654031	0.515402	0.586022	0.487502	0.465864	0.721552	0.498478	0.559368	0.593529			0.216287	0.566749	0.397299	0.431492	0.39478	0.279	0.36294	0.248914	0.376962
962.945		982.921	989.716	987.856	986.482	984.256	985.574	987.573	986.35	987.068	987.153	994.308		19.9764	26.7712	24.9114	23.5378	21.311	22.6297	24.6285	23.4057	24.1238	24.2079	31.3635		1.17708			0.455122	0.652067	0.555746	0.561581	0.469465	0.480235	0.786254	0.536483	0.598105	0.574452			0.233309	0.56429	0.447475	0.397928	0.37348	0.298399	0.510971	0.305831	0.431734
962.848		984.131	989.087	985.801	988.714	985.239	985.741	985.792	986.255	985.892	986.502	994.713		21.2828	26.2391	22.9528	25.8662	22.3911	22.8933	22.9442	23.4069	23.0438	23.6538	31.8652		1.15855			0.477252	0.629045	0.50399	0.607418	0.485492	0.47818	0.720951	0.528064	0.562333	0.552466			0.264448	0.535459	0.383106	0.460874	0.392407	0.295625	0.361565	0.293222	0.381154
962.784		984.519	990.159	989.197	985.295	983.573	986.245	986.573	983.787	986.257	988.847	994.31		21.7348	27.375	26.4128	22.5112	20.7892	23.4613	23.7892	21.0031	23.4728	26.0624	31.5256		1.17103			0.492637	0.663345	0.58621	0.534326	0.455614	0.495323	0.755554	0.478938	0.578972	0.615278			0.286096	0.578413	0.485364	0.360499	0.357124	0.318765	0.440733	0.219649	0.40468
962.625		982.961	990.412	986.875	986.444	982.979	986.321	988.605	981.854	987.481	989.456	994.342		20.3354	27.7861	24.2496	23.8191	20.3532	23.6952	25.9797	19.229	24.8559	26.8302	31.7164		1.16398			0.458146	0.669256	0.534962	0.561969	0.443376	0.497252	0.820162	0.435845	0.609399	0.629594			0.237564	0.585816	0.421626	0.398461	0.342671	0.321368	0.588549	0.155113	0.447703
962.892		985.456	990.693	987.961	987.635	984.907	987.785	986.457	984.993	987.602	987.182	994.48		22.5639	27.8018	25.0693	24.7434	22.0149	24.8933	23.5658	22.1015	24.7108	24.2907	31.5885		1.16869			0.510411	0.672345	0.555285	0.58614	0.481516	0.524509	0.746969	0.502981	0.608294	0.57231			0.311105	0.589684	0.446901	0.431654	0.387712	0.358162	0.42109	0.255657	0.446141
963.055		985.408	989.645	983.731	986.546	985.505	986.254	987.611	985.441	985.356	988.108	994.24		22.3533	26.59	20.6759	23.4912	22.4502	23.1989	24.5562	22.3859	22.3012	25.0531	31.1846		1.18383			0.512197	0.651369	0.463903	0.563685	0.497398	0.495139	0.788444	0.51605	0.556089	0.597919			0.313619	0.563416	0.333249	0.400817	0.406467	0.318517	0.515981	0.27523	0.372326
962.985		984.738	990.483	987.103	986.502	984.843	986.118	988.425	988.717	985.936	989.639	994.389		21.7527	27.4981	24.1178	23.5164	21.8578	23.1327	25.4394	25.7314	22.9507	26.6534	31.404		1.17556			0.494951	0.668907	0.537346	0.560345	0.480888	0.490275	0.811092	0.589029	0.568284	0.631666			0.289352	0.585378	0.424591	0.396231	0.38697	0.311951	0.567798	0.384523	0.389569
962.707		983.799	990.97	990.27	986.222	985.614	986.707	989.199	987.705	988.563	991.792	994.7		21.0919	28.263	27.5629	23.5146	22.9073	24.0003	26.4923	24.998	25.8555	29.0846	31.9929		1.15392			0.471083	0.674858	0.6028	0.549989	0.494701	0.4993	0.829114	0.561707	0.628429	0.676596			0.255769	0.592831	0.505996	0.382009	0.403282	0.324134	0.609031	0.343606	0.474611
963.118		984.461	991.088	991.879	986.644	985.503	987.297	989.221	984.827	986.974	989.115	994.166		21.3434	27.9696	28.761	23.5256	22.3845	24.1788	26.1031	21.709	23.8559	25.9975	31.0482		1.18903			0.491205	0.688176	0.648144	0.566991	0.498122	0.518321	0.841794	0.502648	0.59747	0.623185			0.284082	0.609509	0.562391	0.405358	0.407321	0.349809	0.638042	0.255158	0.430837
962.826		984.623	991.652	989.648	988.549	985.014	987.073	989.669	987.634	986.947	989.804	994.232		21.7971	28.8264	26.8222	25.7228	22.1881	24.2472	26.8431	24.8079	24.1212	26.9782	31.4061		1.17548			0.49593	0.701174	0.597563	0.61288	0.488124	0.513863	0.855793	0.567853	0.59723	0.639323			0.290729	0.625785	0.499483	0.468376	0.395515	0.343792	0.670068	0.35281	0.430497
962.749		985.037	991.254	989.383	984.482	984.84	987.761	990.153	987.806	985.383	989.078	994.098		22.2882	28.5045	26.634	21.7329	22.0911	25.0118	27.404	25.0565	22.634	26.3293	31.3492		1.17761			0.508022	0.6946	0.594445	0.518754	0.48687	0.531028	0.875258	0.574582	0.561423	0.625076			0.307744	0.617553	0.495606	0.339114	0.394035	0.366961	0.714602	0.362888	0.379867
962.834		983.604	990.336	988.911	986.611	983.875	986.635	988.74	987.181	989.476	988.057	994.177		20.7702	27.502	26.0771	23.7768	21.0412	23.8008	25.9062	24.3467	26.6425	25.2228	31.3432		1.17784			0.473513	0.6703	0.582128	0.56765	0.463821	0.505414	0.827579	0.558413	0.660979	0.598922			0.259187	0.587123	0.480287	0.406263	0.366815	0.332387	0.605519	0.338673	0.520635
962.758		984.14	990.999	987.444	986.392	982.704	986.177	987.486	987.118	990.56	988.687	993.596		21.3825	28.2409	24.6861	23.6339	19.9461	23.4193	24.7286	24.3598	27.802	25.9294	30.8379		1.19714			0.495461	0.699589	0.560107	0.573485	0.446887	0.505463	0.802906	0.56787	0.701048	0.625791			0.29007	0.623801	0.452899	0.414276	0.346817	0.332453	0.54907	0.352836	0.577293
962.756		985.213	991.867	989.763	988.697	981.372	987.555	990.092	987.319	987.271	987.729	994.195		22.4569	29.1109	27.0068	25.9406	18.6159	24.7992	27.3361	24.5632	24.5145	24.9729	31.4385		1.17427			0.510416	0.707365	0.601056	0.617434	0.409116	0.525021	0.870613	0.561673	0.606343	0.591193			0.311113	0.633538	0.503828	0.474629	0.302213	0.358853	0.703976	0.343555	0.443382
962.82		982.818	991.25	982.905	986.971	986.748	986.903	989.562	989.144	988.885	987.16	993.905		19.9988	28.4302	20.0854	24.151	23.9283	24.0831	26.7419	26.3247	26.0653	24.3409	31.0855		1.1876			0.459706	0.698667	0.452089	0.581363	0.531835	0.515648	0.861357	0.608785	0.652019	0.582772			0.239759	0.622646	0.318556	0.425094	0.447134	0.346201	0.682798	0.414111	0.507967
962.936		985.076	991.89	981.916	985.693	981.195	987.132	988.906	986.659	989.318	985.872	994.098		22.1407	28.9543	18.9803	22.7573	18.2594	24.1959	25.9707	23.7229	26.3828	22.936	31.1627		1.18466			0.507682	0.709785	0.426159	0.546458	0.404832	0.516781	0.834446	0.547258	0.658328	0.547777			0.307266	0.636569	0.286305	0.37716	0.297154	0.34773	0.621229	0.321967	0.516887
962.378		981.82	990.587	989.42	988.135	988.25	987.339	989.302	987.154	986.635	981.001	993.844		19.4418	28.2087	27.0415	25.7564	25.8717	24.9606	26.9231	24.7759	24.2568	18.6223	31.4653		1.17327			0.441509	0.684857	0.601314	0.612526	0.568089	0.527987	0.856727	0.566053	0.599456	0.440476			0.214155	0.605352	0.504149	0.467889	0.489948	0.362856	0.672206	0.350114	0.433645
962.968		985.642	991.689	989.38	987.332	984.891	986.006	990.861	988.056	987.122	982.309	993.797		22.6736	28.7203	26.4116	24.3633	21.9226	23.0372	27.8926	25.0876	24.154	19.3402	30.8284		1.19751			0.525537	0.711682	0.599439	0.591364	0.491319	0.497367	0.905913	0.585014	0.609246	0.466906			0.332389	0.638944	0.501817	0.438828	0.399288	0.321524	0.784738	0.378511	0.447488
962.823		987.39	989.146	989.283	988.909	984.683	987.403	987.974	986.965	989.722	983.229	993.583		24.5666	26.323	26.4595	26.085	21.859	24.579	25.1508	24.1415	26.8984	20.4052	30.7594		1.2002			0.570693	0.653742	0.601876	0.634577	0.490994	0.531847	0.818698	0.564217	0.679994	0.493724			0.395928	0.566388	0.504847	0.498172	0.398904	0.368066	0.585199	0.347364	0.547522
962.401		984.655	990.239	989.111	988.435	985.747	988.206	987.108	990.135	989.017	981.033	993.5		22.2537	27.8375	26.71	26.034	23.3465	25.8049	24.7068	27.7344	26.6159	18.6324	31.0989		1.18709			0.511319	0.683807	0.60094	0.626421	0.51868	0.552276	0.795464	0.64111	0.665506	0.445907			0.312383	0.604037	0.503683	0.486972	0.4316	0.395643	0.532042	0.462521	0.527036
962.703		984.341	991.391	989.117	988.466	983.511	988.689	989.378	986.663	986.619	983.009	993.502		21.6387	28.6887	26.4142	25.7627	20.8086	25.9859	26.6756	23.9605	23.9162	20.3061	30.7989		1.19866			0.502033	0.711583	0.600075	0.625933	0.466801	0.561569	0.86722	0.559269	0.603829	0.490697			0.299317	0.63882	0.502608	0.486302	0.370335	0.408187	0.696213	0.339955	0.439828
962.738		986.053	991.935	989.196	988.89	986.058	990.377	989.895	987.886	988.324	983.017	993.362		23.3147	29.1966	26.4578	26.1519	23.3195	27.6388	27.1565	25.1479	25.5855	20.2788	30.6237		1.20552			0.544012	0.728324	0.604505	0.639025	0.526122	0.600707	0.887906	0.590343	0.649671	0.492841			0.358385	0.659785	0.508118	0.50428	0.440388	0.461017	0.74354	0.386492	0.504647
962.355		985.268	988.013	989.455	989.951	981.207	987.506	989.5	989.142	989.073	984.643	993.255		22.9126	25.6582	27.1001	27.5957	18.8518	25.1516	27.1452	26.7869	26.718	22.2885	30.9001		1.19473			0.529846	0.63433	0.61364	0.668271	0.421519	0.541758	0.879595	0.623192	0.672357	0.536837			0.338453	0.542078	0.519479	0.544443	0.316859	0.381446	0.724525	0.435687	0.536725
962.188		987.951	988.809	987.559	989.194	984.181	987.129	989.755	986.993	987.664	981.742	993.425		25.7632	26.6208	25.3712	27.0058	21.9931	24.9414	27.5677	24.8055	25.4764	19.5544	31.2374		1.18183			0.589332	0.651022	0.568289	0.646925	0.486447	0.53143	0.88364	0.570864	0.63419	0.465898			0.422155	0.562981	0.463075	0.515129	0.393534	0.367504	0.733781	0.35732	0.482758
962.613		984.173	989.118	987.229	989.949	986.571	987.871	990.726	988.237	988.356	985.65	993.374		21.5603	26.5056	24.6164	27.3365	23.9583	25.2586	28.1134	25.6242	25.7437	23.0377	30.7617		1.20011			0.500817	0.658227	0.559908	0.664972	0.538107	0.54651	0.915065	0.598823	0.650753	0.557377			0.297606	0.572004	0.452651	0.539912	0.454541	0.38786	0.805678	0.399192	0.506177
962.579		987.408	990.982	989.387	989.613	985.765	987.814	990.673	989.01	989.7	984.648	993.713		24.8295	28.4029	26.8083	27.0342	23.1865	25.2358	28.0943	26.4317	27.1216	22.0697	31.1338		1.18576			0.569862	0.696912	0.602474	0.649757	0.514547	0.53949	0.903513	0.610311	0.677389	0.527574			0.394758	0.620449	0.505592	0.519019	0.426719	0.378384	0.779247	0.416395	0.543839
962.842		988.712	987.717	986.283	988.901	986.985	987.304	989.304	989.54	989.104	986.606	993.275		25.8692	24.8751	23.4407	26.0589	24.1423	24.4617	26.4612	26.6974	26.2613	23.7635	30.4325		1.21309			0.607408	0.624419	0.538932	0.640749	0.548106	0.534994	0.870606	0.630651	0.671016	0.581155			0.447589	0.529667	0.426563	0.506648	0.466349	0.372315	0.703959	0.446857	0.534829
963.004		987.584	986.196	983.012	987.103	986.76	988.729	990.682	988.897	986.134	987.298	993.53		24.5794	23.1917	20.0076	24.0984	23.7557	25.7245	27.6774	25.8928	23.1296	24.2941	30.5253		1.2094			0.575369	0.580392	0.458604	0.590744	0.537689	0.560901	0.907851	0.609787	0.589202	0.592327			0.402507	0.474532	0.326658	0.437977	0.454047	0.407286	0.789172	0.415611	0.419145
962.84		989.601	985.801	985.63	987.355	985.365	989.193	987.712	990.651	988.182	985.732	993.498		26.761	22.961	22.7899	24.5145	22.5253	26.3525	24.8719	27.8106	25.3418	22.8916	30.6575		1.20419			0.623737	0.572142	0.520127	0.598354	0.507642	0.572118	0.812311	0.652129	0.642773	0.555726			0.470565	0.464201	0.403175	0.448427	0.418565	0.422426	0.570586	0.479023	0.494893
962.764		988.925	985.188	983.859	989.29	982.92	988.217	987.419	989.268	987.008	986.94	993.42		26.1612	22.4238	21.0952	26.5264	20.1565	25.4529	24.655	26.5037	24.2443	24.1761	30.6558		1.20425			0.60979	0.558787	0.481476	0.647496	0.454283	0.552618	0.805272	0.621518	0.61497	0.586942			0.450941	0.447476	0.355104	0.515914	0.355552	0.396104	0.554481	0.43318	0.45558
[truncated: 1 more columns]

## Sheet: MP-wt2
background	WT2-MP_n1	WT2-MP_n2	WT2-MP_n3	WT2-MP_n4	WT2-MP_n5	WT2-MP_n6	WT2-MP_n7	WT2-MP_n8	WT2-MP_n9	WT2-MP_n10	WT2-MP_n11	WT2-MP_n12	unfrapped nuclei		WT2-MP_n1	WT2-MP_n2	WT2-MP_n3	WT2-MP_n4	WT2-MP_n5	WT2-MP_n6	WT2-MP_n7	WT2-MP_n8	WT2-MP_n9	WT2-MP_n10	WT2-MP_n11	WT2-MP_n12	unfrapped nuclei		ROI2		WT2-MP_n1	WT2-MP_n2	WT2-MP_n3	WT2-MP_n4	WT2-MP_n5	WT2-MP_n6	WT2-MP_n7	WT2-MP_n8	WT2-MP_n9	WT2-MP_n10	WT2-MP_n11	WT2-MP_n12		WT2-MP_n1	WT2-MP_n2	WT2-MP_n3	WT2-MP_n4	WT2-MP_n5	WT2-MP_n6
967.918	998.286	1003.8	1018.67	1001.83	1015.36	1035.75	1015.9	1029.03	1040.94	1027.36	1019.72	1031.73	1012.01		30.368	35.8823	50.7545	33.9157	47.4459	67.8323	47.9847	61.1172	73.0213	59.4448	51.8009	63.8103	44.091		1.00267		0.981586	1.02022	1.01716	0.986912	1.04269	0.984599	1.00392	0.983163	0.980542	1.04024	1.03132	0.992327		0.971315	1.0258	1.01927	0.979343	1.05596	0.982426
968.167	999.839	1002.81	1017.48	1003.17	1011.97	1038.49	1016.03	1031.71	1044.48	1023.32	1017.09	1033.31	1012.49		31.6727	34.648	49.3085	34.9989	43.8037	70.3225	47.865	63.5427	76.3173	55.1516	48.9229	65.1407	44.3266		0.997342		1.01832	0.979889	0.98293	1.01302	0.957534	1.01532	0.996097	1.01675	1.01935	0.959978	0.968845	1.00763		1.02853	0.974341	0.980828	1.02055	0.944334	1.01748
968.061	978.322	975.105	973.129	979.725	978.056	975.952	976.88	971.531	981.807	970.152	974.641	976.521	1008.9		10.2608	7.04386	5.06816	11.6637	9.99516	7.89076	8.81856	3.46986	13.7464	2.09086	6.57956	8.45966	40.8427		1.08242		0.358037	0.216202	0.109648	0.366394	0.237128	0.123645	0.199174	0.0602573	0.199269	0.0394983	0.141413	0.142021		0	0	0	0	0	0
967.022	979.072	975.702	972.128	978.621	981.499	974.53	974.644	972.487	977.902	973.101	971.402	976.917	1009.15		12.0496	8.67967	5.10617	11.5993	14.4767	7.50837	7.62217	5.46477	10.88	6.07857	4.37957	9.89477	42.1263		1.04944		0.407644	0.258293	0.107104	0.353269	0.332984	0.114068	0.166907	0.0920091	0.152912	0.111331	0.091261	0.161052		0.0772736	0.0537018	-0.00285703	-0.0207152	0.125651	-0.0109281
967.436	979.535	981.368	977.377	984.912	979.65	976.063	974.7	973.713	983.079	975.384	972.724	978.591	1007.93		12.0992	13.9316	9.9405	17.4755	12.2139	8.6265	7.2643	6.2769	15.6425	7.9475	5.2883	11.1547	40.4982		1.09162		0.425778	0.431249	0.216889	0.553632	0.292231	0.136324	0.165465	0.109931	0.228685	0.151413	0.114627	0.188858		0.105522	0.274366	0.120448	0.295512	0.0722307	0.0144673
968.293	978.872	984.084	978.486	981.125	980.394	980.56	972.722	975.802	986.341	977.806	974.06	978.385	1008.5		10.5783	15.7904	10.1922	12.8319	12.1005	12.2668	4.42844	7.50804	18.0477	9.51274	5.76664	10.0919	40.2042		1.09961		0.37498	0.492363	0.224008	0.409494	0.291636	0.195269	0.101608	0.132454	0.265777	0.182558	0.125909	0.172114		0.0263924	0.352337	0.128443	0.068024	0.0714502	0.0817293
966.575	978.178	980.926	977.943	979.52	979.919	975.916	975.162	977.131	981.131	982.489	976.877	980.934	1007.86		11.6027	14.3515	11.3681	12.9456	13.3443	9.34117	8.58737	10.5558	14.5561	15.9146	10.3022	14.3595	41.2877		1.07075		0.400497	0.435752	0.243294	0.40228	0.313171	0.144795	0.191861	0.181335	0.208733	0.297401	0.219036	0.238469		0.0661418	0.28011	0.150105	0.0566375	0.0996801	0.0241338
966.993	982.201	980.709	978.29	983.069	978.646	981.022	975.798	976.897	983.095	979.803	976.508	979.59	1007.69		15.2086	13.7162	11.2975	16.076	11.6531	14.0293	8.80516	9.90416	16.102	12.8108	9.51506	12.5971	40.6955		1.08633		0.532604	0.422522	0.245301	0.506825	0.277461	0.220628	0.19959	0.172617	0.234261	0.242883	0.205245	0.212245		0.271927	0.263231	0.152359	0.221639	0.0528694	0.110667
966.221	980.228	979.823	978.615	988.752	979.985	978.664	973.882	977.632	984.248	981.544	977.824	977.257	1007.56		14.0065	13.6016	12.394	22.531	13.7635	12.4427	7.66061	11.4112	18.0268	15.3226	11.6025	11.0355	41.3359		1.0695		0.482908	0.412502	0.264941	0.699328	0.322633	0.192646	0.170956	0.195802	0.258201	0.286005	0.246395	0.183054		0.194515	0.250447	0.174418	0.525458	0.112083	0.0787362
966.43	984.772	977.4	980.883	982.473	982.416	979.238	972.554	976.85	987.918	980.372	977.234	980.133	1007.89		18.3427	10.9703	14.4537	16.0438	15.9861	12.8087	6.12463	10.4206	21.4886	13.9428	10.8047	13.7029	41.4643		1.06619		0.630451	0.331671	0.308014	0.496433	0.373574	0.197699	0.136255	0.178251	0.306832	0.259444	0.228742	0.226596		0.424346	0.14732	0.222795	0.205237	0.178858	0.0845018
966.736	983.307	979.125	978.191	982.895	982.602	977.962	976.232	976.982	983.239	980.481	976.79	981.495	1007.55		16.5709	12.3887	11.4545	16.1592	15.8659	11.2261	9.49642	10.2455	16.5026	13.7444	10.0537	14.7586	40.8182		1.08307		0.578568	0.380483	0.247964	0.507918	0.376634	0.176014	0.214612	0.178029	0.239368	0.259801	0.216212	0.247917		0.343527	0.209596	0.155349	0.223363	0.182868	0.059758
966.858	978.885	979.81	978.804	979	982.167	976.981	980.79	979.799	981.04	976.908	977.508	984.313	1007.82		12.0275	12.9528	11.9467	12.1428	15.3093	10.1234	13.9326	12.9416	14.1822	10.0504	10.6499	17.4559	40.964		1.07921		0.418442	0.396391	0.257698	0.380315	0.362127	0.15816	0.313746	0.224077	0.204978	0.189299	0.228218	0.292182		0.0940943	0.229893	0.166282	0.0219718	0.163853	0.0393845
966.703	979.841	984.275	979.73	980.041	984.1	976.521	980.766	979.59	983.174	979.002	978.413	981.733	1007.72		13.138	17.5718	13.0271	13.3377	17.3968	9.81761	14.0627	12.8867	16.4711	12.2988	11.7096	15.0299	41.0163		1.07783		0.456494	0.53706	0.280645	0.417208	0.41098	0.153187	0.316272	0.222842	0.237757	0.231353	0.250607	0.251254		0.153369	0.409363	0.192055	0.0801974	0.227891	0.0337098
967.193	979.161	983.381	979.968	980.369	981.127	982.519	981.678	977.869	981.961	978.596	981.362	983.923	1007.61		11.9674	16.1878	12.7743	13.1758	13.9336	15.3252	14.4848	10.6752	14.7675	11.4026	14.1685	16.7295	40.4192		1.09376		0.421963	0.502069	0.279264	0.418232	0.334029	0.242656	0.330577	0.187327	0.216315	0.217663	0.307711	0.283798		0.0995798	0.36472	0.190504	0.0818142	0.127021	0.135802
966.601	981.035	981.989	978.658	981.061	980.036	982.048	982.005	978.993	985.809	979.118	981.549	982.029	1006.67		14.4336	15.3881	12.057	14.4596	13.435	15.4468	15.4036	12.3919	19.2075	12.5163	14.9474	15.4274	40.07		1.10329		0.513355	0.481426	0.26588	0.462983	0.324883	0.246713	0.35461	0.219347	0.283804	0.241005	0.327457	0.26399		0.241943	0.338383	0.175472	0.152444	0.115032	0.140432
966.234	978.861	982.227	981.209	977.397	978.677	982.498	980.745	979.178	984.154	983.774	979.926	982.85	1006.7		12.6264	15.9925	14.9742	11.1628	12.4426	16.264	14.5111	12.9435	17.92	17.5395	13.6917	16.6153	40.4671		1.09246		0.444672	0.495425	0.326969	0.353915	0.297932	0.257216	0.330786	0.226862	0.262182	0.334413	0.297004	0.281527		0.134954	0.356243	0.244085	-0.019695	0.0797038	0.152417
967.085	979.573	984.374	982.294	978.479	980.687	979.012	983.245	983.443	985.299	990.721	979.61	983.288	1006.56		12.488	17.2883	15.2089	11.3942	13.6014	11.9265	16.1599	16.3576	18.2135	23.6356	12.5243	16.2025	39.4711		1.12003		0.450895	0.54908	0.340474	0.370367	0.333897	0.193378	0.377665	0.293936	0.2732	0.462014	0.278536	0.28146		0.144647	0.424699	0.259252	0.00626988	0.126847	0.0795709
966.895	977.465	975.885	982.301	982.273	979.007	977.925	984.159	980.402	983.62	980.861	977.994	986.414	1006.04		10.5701	8.99049	15.4064	15.3779	12.1125	11.03	17.2645	13.5073	16.7252	13.9667	11.0994	19.5189	39.1482		1.12927		0.384795	0.287895	0.34774	0.503979	0.299799	0.180317	0.406809	0.244719	0.252945	0.275264	0.248882	0.341867		0.0416814	0.0914692	0.267413	0.217146	0.0821504	0.0646673
965.898	985.088	983.536	981.852	981.239	981.419	982.238	987.164	983.306	982.624	981.591	978.916	984.787	1005.64		19.1897	17.6379	15.9535	15.3407	15.5206	16.3399	21.2657	17.408	16.7255	15.6932	13.018	18.8884	39.7408		1.11243		0.688167	0.556383	0.35472	0.495264	0.378425	0.263139	0.493618	0.310688	0.249178	0.304679	0.287551	0.325891		0.514251	0.434016	0.275252	0.203391	0.185217	0.159176
966.309	979.889	980.74	979.298	981.472	977.476	984.623	984.312	977.84	985.916	980.549	976.891	985.195	1005.74		13.5792	14.4303	12.9884	15.1624	11.1667	18.3139	18.0023	11.531	19.607	14.2398	10.5822	18.886	39.4324		1.12113		0.490776	0.45876	0.29105	0.493336	0.274398	0.297236	0.421137	0.207408	0.294391	0.278624	0.235576	0.328399		0.206771	0.309465	0.203742	0.200348	0.0488538	0.198082
966.305	979.763	981.64	986.156	982.211	981.658	985.948	984.106	984.363	982.244	978.251	979.058	983.63	1005.01		13.4585	15.335	19.8512	15.9061	15.3532	19.6427	17.8015	18.0584	15.9387	11.9457	12.753	17.3254	38.7035		1.14224		0.495575	0.496703	0.453213	0.52728	0.384377	0.324806	0.424282	0.330934	0.24382	0.238139	0.289247	0.306936		0.214246	0.357874	0.385875	0.253921	0.193018	0.229543
966.397	982.564	982.965	984.569	982.551	979.986	980.154	987.389	983.925	980.986	979.722	980.276	986.791	1004.94		16.1675	16.5681	18.1724	16.1543	13.5897	13.7574	20.9923	17.5288	14.5897	13.3252	13.879	20.3946	38.54		1.14709		0.597851	0.538919	0.416645	0.537779	0.341669	0.228453	0.502454	0.322591	0.224131	0.266765	0.316121	0.362842		0.373564	0.411735	0.344803	0.270491	0.137036	0.119595
966.007	980.593	981.16	984.742	980.375	980.715	985.191	985.155	982.055	983.894	980.906	978.895	987.83	1004.68		14.5861	15.1528	18.7353	14.3684	14.7081	19.1841	19.148	16.048	17.8871	14.8991	12.8877	21.8226	38.6778		1.143		0.537451	0.491127	0.42802	0.476621	0.36847	0.317433	0.456677	0.294287	0.273807	0.297211	0.292496	0.386864		0.279477	0.350759	0.357579	0.173968	0.172167	0.221129
966.032	982.49	982.95	980.525	981.211	977.845	984.582	986.82	978.494	984.074	983.579	979.511	984.524	1003.84		16.4578	16.9181	14.4931	15.1792	11.8129	18.5503	20.7884	12.4621	18.0426	17.5472	13.479	18.4925	37.8102		1.16923		0.620333	0.560926	0.338702	0.515072	0.30273	0.313989	0.507178	0.233773	0.282525	0.358069	0.312936	0.335352		0.408585	0.439813	0.257262	0.234653	0.0859934	0.2172
966.048	979.282	983.937	982.274	978.897	982.634	982.062	988.871	979.33	988.328	981.003	980.404	983.859	1004.07		13.2344	17.8886	16.2257	12.8489	16.5856	16.014	22.8232	13.2817	22.2799	14.9549	14.3557	17.8114	38.0202		1.16277		0.496079	0.589827	0.377098	0.433589	0.422692	0.269561	0.553745	0.247771	0.346949	0.303484	0.331448	0.321216		0.215032	0.476685	0.300386	0.106052	0.243244	0.166503
965.693	981.618	980.979	983.953	983.495	980.899	982.448	989.192	982.899	984.599	980.415	979.087	983.77	1003.34		15.9254	15.2862	18.2602	17.8025	15.2066	16.7549	23.4991	17.2066	18.9063	14.7225	13.3946	18.0768	37.6447		1.17437		0.602905	0.509049	0.428615	0.606743	0.391414	0.284847	0.575832	0.324193	0.297351	0.301749	0.312344	0.329255		0.381437	0.373625	0.358248	0.379336	0.202243	0.183945
965.151	979.93	986.335	982.143	980.857	975.528	987.341	989.468	981.41	981.903	980.413	979.347	984.407	1002.87		14.7784	21.1842	16.9913	15.7055	10.3767	22.1893	24.3166	16.2587	16.7519	15.2614	14.1957	19.256	37.7207		1.172		0.558355	0.704037	0.398027	0.534195	0.266556	0.376476	0.594663	0.305716	0.262937	0.312164	0.330357	0.350026		0.312039	0.622399	0.323893	0.264835	0.0385744	0.288502
966.187	979.315	989.093	982.885	977.062	979.246	981.648	990.578	983.012	983.951	977.573	979.482	983.572	1002.28		13.1288	22.9062	16.6982	10.8753	13.0599	15.4618	24.3918	16.8255	17.7644	11.3865	13.2956	17.3857	36.0917		1.2249		0.518418	0.795626	0.408816	0.3866	0.350623	0.274174	0.623426	0.330653	0.291414	0.243417	0.323376	0.330293		0.249829	0.739251	0.336011	0.0318907	0.148773	0.171767
966.22	983.885	980.61	982.837	979.832	978.772	985.421	989.014	980.924	987.803	978.874	981.753	981.191	1002.41		17.6656	14.3907	16.6176	13.6126	12.5522	19.2012	22.7942	14.7043	21.5836	12.6541	15.5338	14.9715	36.1942		1.22143		0.695586	0.498431	0.40569	0.482535	0.336037	0.339517	0.580942	0.288149	0.353062	0.269749	0.376743	0.283622		0.525808	0.360079	0.332499	0.183302	0.129654	0.246329
966.415	986.694	982.026	982.115	979.546	979.718	984.198	989.745	980.933	987.077	981.823	980.29	980.76	1002.17		20.2784	15.6111	15.6994	13.131	13.303	17.7823	23.3296	14.5173	20.6615	15.4081	13.8752	14.3446	35.7575		1.23635		0.808218	0.547305	0.387955	0.471149	0.360488	0.318269	0.60185	0.287959	0.342107	0.332468	0.340627	0.275065		0.701258	0.422434	0.312581	0.165332	0.161704	0.222083
966.157	982.967	981.288	983.862	977.747	979.055	983.288	989.665	980.672	989.325	978.128	982.543	982.159	1002.86		16.8107	15.1313	17.7051	11.5905	12.8985	17.1317	23.5085	14.5154	23.1686	11.9708	16.3861	16.0019	36.7074		1.20436		0.652671	0.516756	0.426197	0.405113	0.340481	0.298689	0.590771	0.280471	0.373691	0.251615	0.391858	0.298904		0.458958	0.383459	0.355532	0.0611088	0.135479	0.199741
966.33	981.668	982.603	984.917	977.033	981.798	989.58	988.742	983.693	984.506	981.861	983.021	984.75	1002.84		15.3371	16.2728	18.5861	10.7026	15.4673	23.2493	22.4119	17.3628	18.1758	15.5305	16.6906	18.4195	36.5141		1.21073		0.598611	0.558682	0.449773	0.37606	0.410452	0.407495	0.566195	0.337265	0.294713	0.328166	0.401253	0.345885		0.374748	0.43695	0.382011	0.0152551	0.227198	0.323898
965.185	982.078	977.284	986.562	979.021	981.312	990.158	990.364	984.064	987.656	980.826	980.469	982.168	1002.41		16.8929	12.0982	21.3763	13.8357	16.127	24.9727	25.1781	18.8787	22.4707	15.6409	15.2832	16.9829	37.2262		1.18757		0.646723	0.407414	0.507399	0.476849	0.419772	0.429329	0.623911	0.359696	0.357384	0.324176	0.36039	0.312808		0.449692	0.243956	0.446734	0.174327	0.239416	0.348812
965.877	979.562	976.097	988.051	981.46	981.285	988.677	990.507	985.572	990.962	979.074	980.18	986.361	1002.49		13.6848	10.22	22.1738	15.5834	15.4082	22.8003	24.6299	19.695	25.0852	13.1971	14.3035	20.4839	36.6173		1.20732		0.532616	0.349887	0.53508	0.546014	0.407731	0.398499	0.620475	0.381489	0.4056	0.278074	0.342896	0.383566		0.271946	0.170561	0.477825	0.283488	0.223632	0.313633
965.956	982.001	979.027	988.02	980.537	979.181	992.64	990.728	986.827	988.398	980.541	979.138	985.323	1003.46		16.0455	13.0715	22.0639	14.5814	13.2255	26.6838	24.7721	20.8712	22.4425	14.5851	13.1818	19.367	37.5069		1.17869		0.609683	0.436895	0.5198	0.498787	0.341671	0.455312	0.609256	0.394683	0.354264	0.300031	0.308511	0.35405		0.391995	0.281569	0.460663	0.208952	0.137039	0.378462
966.047	979.687	979.205	991.259	982.156	980.466	993.807	990.034	988.46	990.409	977.881	978.869	986.328	1003.16		13.6394	13.1574	25.2119	16.1087	14.4188	27.7597	23.9861	22.4124	24.3619	11.8332	12.8219	20.2807	37.113		1.1912		0.523758	0.444433	0.600267	0.55688	0.376453	0.478698	0.596186	0.428326	0.388644	0.246005	0.303272	0.374689		0.258148	0.291186	0.551039	0.300638	0.182631	0.405147
965.322	979.304	980.656	984.942	982.613	984.058	986.805	989.068	984.734	993.588	980.83	982.637	982.617	1003.35		13.9821	15.3344	19.6206	17.2915	18.7367	21.4837	23.7465	19.4126	28.2663	15.5086	17.3156	17.2954	38.0265		1.16258		0.52402	0.505525	0.455922	0.583409	0.477435	0.361572	0.576051	0.362084	0.440098	0.314669	0.399721	0.311859		0.258555	0.36913	0.388918	0.342508	0.315003	0.271496
966.387	981.254	981.198	988.869	981.001	978.574	985.166	990.501	987.052	993.256	980.199	983.216	983.46	1003.71		14.8666	14.8109	22.4813	14.614	12.1872	18.7784	24.1134	20.6643	26.8689	13.812	16.8286	17.0723	37.3242		1.18445		0.567653	0.497455	0.532226	0.502349	0.316389	0.321989	0.595958	0.392683	0.426212	0.285518	0.395789	0.313628		0.326524	0.358833	0.474619	0.214574	0.103897	0.226328
966.044	984.13	976.656	986.06	984.374	982.534	990.804	991.548	986.814	993.07	979.308	981.657	980.499	1004.1		18.0857	10.6116	20.0162	18.3298	16.4897	24.7594	25.5037	20.7698	27.0255	13.2634	15.6131	14.4551	38.059		1.16159		0.677236	0.349532	0.464718	0.617914	0.41982	0.416347	0.61815	0.387068	0.42042	0.268884	0.360113	0.260422		0.497224	0.170107	0.398797	0.396966	0.239479	0.333999
965.708	980.953	978.345	987.56	982.66	983.629	989.865	989.612	986.608	993.445	979.343	982.217	979.362	1003.86		15.2447	12.6361	21.8519	16.9518	17.9205	24.1563	23.9033	20.8992	27.737	13.6348	16.5082	13.6538	38.1504		1.1588		0.569485	0.415219	0.506122	0.570092	0.455155	0.405233	0.577972	0.388546	0.430454	0.275752	0.379846	0.245397		0.329378	0.253914	0.445301	0.321489	0.285797	0.321317
966.031	984.569	974.795	982.895	978.989	983.927	990.843	989.535	982.5	991.673	978.594	982.832	983.401	1004.13		18.538	8.76371	16.8638	12.9581	17.8956	24.8123	23.5037	16.4689	25.642	12.563	16.8003	17.3702	38.1003		1.16033		0.69342	0.288352	0.391104	0.436356	0.45512	0.416784	0.569057	0.306583	0.398465	0.254409	0.387075	0.312601		0.522434	0.0920514	0.316118	0.110418	0.285751	0.334498
965.554	982.94	980.628	986.162	985.172	983.127	989.422	988.267	986.224	992.238	978.227	981.441	981.644	1004.18		17.386	15.0741	20.608	19.618	17.5726	23.8674	22.713	20.6703	26.6842	12.6729	15.8866	16.0899	38.6254		1.14455		0.641489	0.48924	0.471442	0.651643	0.44083	0.395462	0.542437	0.379565	0.409023	0.253146	0.361048	0.285624		0.441539	0.348352	0.406349	0.450199	0.267019	0.310168
965.712	978.435	976.431	987.808	979.481	981.431	984.146	990.234	987.112	991.249	977.852	984.429	982.423	1004.11		12.7232	10.7188	22.0964	13.769	15.7195	18.4347	24.522	21.4008	25.5376	12.1403	18.7174	16.711	38.3951		1.15142		0.472261	0.349971	0.508523	0.460101	0.396707	0.307279	0.589153	0.395336	0.393796	0.243961	0.427933	0.298428		0.177929	0.170668	0.447997	0.147895	0.209182	0.209543
965.809	983.476	980.19	981.949	981.34	981.857	988.18	989.252	982.594	993.663	978.622	982.019	982.167	1004.28		17.6667	14.3812	16.1403	15.5312	16.0482	22.3714	23.4432	16.7854	27.8541	12.8135	16.2097	16.358	38.4685		1.14922		0.654503	0.468654	0.370742	0.517997	0.40423	0.372186	0.562159	0.309484	0.428697	0.256998	0.369893	0.291567		0.461813	0.322088	0.293247	0.23927	0.219043	0.283608
965.467	980.162	981.317	985.308	980.764	983.627	990.703	989.474	985.105	991.406	980.142	984.916	981.822	1004.21		14.6941	15.8499	19.8404	15.297	18.1598	25.2351	24.0066	19.6373	25.9385	14.6745	19.4487	16.3547	38.7472		1.14095		0.540462	0.512802	0.452455	0.506517	0.454129	0.41681	0.571529	0.359463	0.396343	0.292207	0.440613	0.289412		0.284168	0.378414	0.385024	0.221151	0.284452	0.334527
966.165	979.401	981.68	985.578	980.626	984.787	990.886	989.774	985.709	993.782	978.749	985.697	981.614	1004.64		13.2359	15.5151	19.4129	14.4608	18.6218	24.7203	23.6085	19.544	27.6165	12.5832	19.5321	15.4491	38.4706		1.14916		0.490328	0.505579	0.445889	0.482271	0.46903	0.411242	0.566093	0.360327	0.425017	0.252366	0.445684	0.275352		0.206073	0.369198	0.37765	0.182885	0.303985	0.328174
965.789	982.341	980.934	984.868	984.919	983.936	989.436	989.88	985.285	995.207	976.753	983.566	982.868	1004.06		16.552	15.1449	19.0794	19.1302	18.1469	23.6471	24.0907	19.4961	29.4183	10.964	17.7775	17.0789	38.2719		1.15512		0.616358	0.496078	0.440505	0.641309	0.459442	0.395431	0.580654	0.36131	0.455097	0.221033	0.407754	0.305981		0.402393	0.357077	0.371602	0.43389	0.291417	0.310132
966.006	981.837	983.41	990.112	983.367	983.34	990.055	988.891	989.45	995.734	974.064	987.222	982	1003.86		15.8303	17.4034	24.1062	17.3611	17.3338	24.0484	22.8848	23.4433	29.7276	8.05781	21.2157	15.9932	37.8501		1.168		0.596052	0.576408	0.562765	0.588488	0.443746	0.406623	0.557735	0.439303	0.465007	0.164255	0.492036	0.289723		0.370762	0.459565	0.508919	0.350524	0.270842	0.322903
964.737	981.002	982.465	985.538	982.08	982.086	987.806	989.114	985.686	999.11	977.888	983.525	979.73	1003.85		16.2641	17.7279	20.8008	17.3429	17.348	23.0687	24.3769	20.9487	34.372	13.1505	18.7878	14.9924	39.1157		1.13021		0.592572	0.568158	0.469888	0.568851	0.42974	0.377437	0.574878	0.379855	0.52026	0.259394	0.42163	0.262805		0.365341	0.449039	0.404604	0.319531	0.252483	0.2896
965.936	984.484	977.844	985.346	982.125	982.447	990.2	989.151	985.675	993.3	979.847	985.189	980.992	1003.74		18.5482	11.9083	19.4101	16.1886	16.5108	24.2638	23.2152	19.7386	27.3643	13.9108	19.2535	15.0559	37.803		1.16945		0.699259	0.3949	0.453698	0.549428	0.423204	0.410776	0.566493	0.370341	0.428573	0.283919	0.447085	0.273083		0.531529	0.22799	0.38642	0.288877	0.243915	0.327643
965.615	978.277	979.716	987.46	981.94	981.647	990.699	988.312	984.798	994.29	977.176	985.079	982.762	1004.11		12.6617	14.101	21.8447	16.3247	16.0318	25.084	22.6971	19.183	28.6747	11.5613	19.4644	17.1468	38.4908		1.14856		0.468809	0.459257	0.501481	0.544146	0.403583	0.417073	0.543953	0.353485	0.441071	0.231748	0.443905	0.30545		0.172553	0.310098	0.440087	0.28054	0.218195	0.334828
965.085	980.481	978.51	982.889	981.587	983.742	990.653	989.01	984.474	996.308	979.767	987.147	980.868	1003.91		15.3961	13.4243	17.8032	16.5012	18.6563	25.5672	23.9243	19.3889	31.2222	14.6813	22.062	15.7824	38.8291		1.13855		0.565086	0.433408	0.40514	0.545237	0.46556	0.421404	0.568368	0.354167	0.476072	0.291726	0.498763	0.278695		0.322526	0.27712	0.331883	0.282262	0.299436	0.339769
965.625	982.631	977.389	989.795	983.532	982.271	988.451	988.762	989.716	997.18	977.894	984.507	979.222	1004.13		17.0059	11.7636	24.1701	17.9074	16.6462	22.8257	23.1374	24.0909	31.5553	12.2693	18.8818	13.5971	38.5066		1.14809		0.629399	0.382972	0.554636	0.596656	0.418878	0.379369	0.554277	0.443741	0.485181	0.245839	0.430442	0.242116		0.422706	0.212772	0.499789	0.363416	0.238243	0.291803
965.803	979.248	980.045	985.476	983.638	982.956	988.848	989.08	986.239	999.108	976.483	988.395	981.143	1003.82		13.4448	14.2415	19.6727	17.8353	17.1525	23.0452	23.2764	20.4357	33.3046	10.6801	22.5924	15.3402	38.0162		1.16289		0.50402	0.469624	0.457257	0.601921	0.437186	0.387958	0.564801	0.38127	0.518683	0.216758	0.521675	0.276679		0.227401	0.323325	0.390417	0.371724	0.262243	0.301605
965.438	982.011	978.713	986.904	978.977	980.988	986.259	988.104	987.412	997.668	976.903	983.288	981.366	1003.87		16.5726	13.2748	21.4658	13.539	15.5498	20.8206	22.666	21.9738	32.2297	11.4644	17.8494	15.9284	38.4284		1.15042		0.614611	0.43305	0.493583	0.452024	0.392085	0.346748	0.54409	0.405569	0.496559	0.230179	0.407735	0.284206		0.399671	0.276664	0.431217	0.135147	0.203123	0.25458
964.866	979.433	981.313	988.263	983.397	982.232	990.986	988.26	988.354	997.888	974.957	986.931	981.473	1003.56		14.5666	16.4462	23.3969	18.5307	17.3653	26.1194	23.3931	23.4879	33.0214	10.0908	22.0642	16.6062	38.6946		1.1425		0.536501	0.532818	0.534286	0.614426	0.434851	0.432002	0.557681	0.430533	0.505256	0.201208	0.500547	0.294262		0.277998	0.403951	0.476932	0.391461	0.259182	0.351863
965.265	979.119	980.744	989.554	984.937	984.898	990.632	988.994	988.932	997.135	976.528	981.523	984.378	1004.1		13.8538	15.4788	24.2892	19.6719	19.6328	25.3671	23.7297	23.6676	31.8705	11.2629	16.2581	19.1128	38.8344		1.13839		0.50841	0.49967	0.552665	0.649916	0.489861	0.418049	0.563668	0.432264	0.485891	0.22377	0.367502	0.337459		0.23424	0.36166	0.497575	0.447473	0.331292	0.335941
965.777	981.981	979.915	988.953	981.523	984.883	990.159	988.502	987.944	999.186	976.215	979.559	978.982	1003.95		16.2041	14.1389	23.1769	15.7465	19.106	24.3821	22.7251	22.1672	33.409	10.4382	13.7825	13.2051	38.178		1.15797		0.604886	0.464264	0.536423	0.529174	0.484913	0.408724	0.549086	0.411822	0.518104	0.21095	0.316899	0.23716		0.384523	0.316487	0.479333	0.25691	0.324806	0.325301
965.32	984.983	983.602	988.25	983.654	986.175	990.866	988.817	990.468	997.411	977.063	981.022	980.362	1003.59		19.6633	18.2823	22.9297	18.3336	20.8547	25.5456	23.4968	25.1478	32.0914	11.7434	15.7022	15.0416	38.2664		1.15529		0.73232	0.59893	0.529476	0.614692	0.528073	0.427239	0.566421	0.466116	0.496521	0.236779	0.360205	0.26952		0.583029	0.488299	0.47153	0.391881	0.381381	0.346428
965.676	985.236	982.522	989.835	980.197	984.718	990.881	988.823	988.566	994.596	976.168	984.512	978.773	1003.58		19.5602	16.846	24.1593	14.5207	19.0423	25.2049	23.1471	22.8896	28.9196	10.4917	18.8356	13.0966	37.9063		1.16626		0.735401	0.55712	0.563169	0.491478	0.486761	0.425546	0.563292	0.428291	0.451698	0.213552	0.436189	0.236898		0.587829	0.434957	0.509372	0.197417	0.327228	0.344496
965.611	984.978	980.76	986.205	979.214	986.084	988.84	989.776	987.312	997.854	974.468	978.835	981.274	1003.89		19.3673	15.1485	20.5943	13.6027	20.4729	23.2292	24.1647	21.7005	32.2434	8.85714	13.224	15.6627	38.2746		1.15504		0.721142	0.496161	0.475447	0.455977	0.518295	0.388416	0.582397	0.402135	0.498766	0.178546	0.303291	0.280589		0.565617	0.357183	0.410847	0.141386	0.368563	0.302127
965.754	981.104	975.691	986.52	982.163	983.829	989.405	988.676	987.531	998.37	980.399	982.742	980.01	1003.52		15.3492	9.93671	20.766	16.4082	18.0748	23.6509	22.9216	21.7765	32.6152	14.645	16.9872	14.256	37.7678		1.17054		0.579197	0.329825	0.485844	0.5574	0.463724	0.400773	0.559849	0.408958	0.511287	0.299182	0.394827	0.258815		0.344506	0.144965	0.422524	0.301458	0.29703	0.316228
966.36	984.583	980.908	988.183	980.54	986.41	990.977	989.981	987.782	999.076	976.384	982.575	981.628	1003.87		18.2226	14.5481	21.8235	14.1797	20.0499	24.6174	23.6209	21.4221	32.716	10.0235	16.2146	15.2679	37.5096		1.1786		0.692357	0.486213	0.5141	0.485012	0.517938	0.420023	0.580901	0.405071	0.516398	0.206179	0.379464	0.279094		0.520778	0.344491	0.45426	0.187211	0.368095	0.338193
965.156	980.838	981.601	989.912	982.996	983.814	989.17	988.111	990.633	995.853	975.954	984.056	983.438	1003.18		15.6815	16.4446	24.7558	17.8396	18.6576	24.0143	22.9549	25.4764	30.6972	10.7976	18.9	18.2823	38.0193		1.1628		0.587822	0.542229	0.575358	0.602017	0.47551	0.40424	0.556954	0.475276	0.478037	0.219125	0.43638	0.329717		0.357942	0.415958	0.523063	0.371876	0.31248	0.320183
965.701	983.774	976.941	985.882	981.884	985.139	990.481	990.012	987.834	993.382	976.82	983.291	981.313	1003.3		18.0732	11.2397	20.1807	16.1828	19.4379	24.7801	24.3106	22.1326	27.6809	11.1193	17.5901	15.6117	37.6015		1.17572		0.685002	0.374725	0.474238	0.552174	0.500901	0.421765	0.596401	0.417483	0.435855	0.22816	0.410648	0.284681		0.509321	0.202249	0.409489	0.29321	0.345763	0.340182
965.877	982.158	979.074	986.244	983.801	986.508	990.602	988.97	986.144	992.759	977.936	982.75	981.029	1003.37		16.2808	13.1964	20.3664	17.9236	20.6302	24.7246	23.0928	20.2669	26.8816	12.059	16.873	15.1521	37.496		1.17903		0.618803	0.441198	0.479948	0.613292	0.533121	0.422004	0.568119	0.383367	0.42446	0.248138	0.395015	0.277078		0.406201	0.287058	0.415903	0.389672	0.387998	0.340455
965.257	982.598	978.226	987.844	982.838	986.256	990.441	985.968	987.983	1000.77	977.551	980.62	984.957	1003.15		17.3416	12.9694	22.5871	17.5809	20.9989	25.184	20.7113	22.7263	35.5115	12.2946	15.3637	19.7008	37.8918		1.16671		0.65224	0.429082	0.526723	0.595285	0.536983	0.425357	0.50421	0.4254	0.554871	0.250345	0.355926	0.356496		0.458288	0.2716	0.468438	0.361252	0.393061	0.34428
965.519	981.489	978.782	982.697	985.217	988.088	990.668	985.712	984.484	993.144	977.512	980.933	982.135	1003.09		15.97	13.2627	17.1772	19.6977	22.569	25.1485	20.1932	18.9642	27.625	11.9925	15.4141	16.6154	37.5665		1.17681		0.605852	0.442583	0.404033	0.672732	0.582129	0.428434	0.495852	0.358052	0.43538	0.246307	0.360184	0.303266		0.386027	0.288825	0.330639	0.483484	0.45224	0.347792
965.413	981.271	977.744	986.322	981.242	987.864	990.891	986.035	986.059	996.19	974.558	978.978	984.036	1002.68		15.8586	12.3313	20.9096	15.8296	22.4514	25.4786	20.6227	20.6466	30.7773	9.14466	13.5649	18.6229	37.2641		1.18637		0.606507	0.41484	0.495815	0.545012	0.583795	0.43758	0.510508	0.392979	0.488997	0.189341	0.319545	0.342665		0.387047	0.25343	0.433724	0.281907	0.454423	0.358228
965.41	981.609	977.308	985.429	981.9	983.8	989.937	986.071	984.843	996.511	975.102	982.44	982.059	1002.5		16.1993	11.8986	20.0196	16.4906	18.3906	24.5272	20.6613	19.4329	31.1017	9.69221	17.0306	16.6496	37.0947		1.19178		0.622367	0.402112	0.47688	0.570364	0.480388	0.423164	0.5138	0.371568	0.496408	0.201594	0.403018	0.307756		0.411753	0.237191	0.412457	0.32192	0.318873	0.341778
965.508	984.349	981.871	985.352	984.155	988.869	989.647	986.135	987.554	993.78	976.416	981.168	986.231	1002.61		18.8411	16.3633	19.8444	18.6475	23.3615	24.1392	20.6275	22.046	28.2719	10.9079	15.6604	20.7231	37.1001		1.19161		0.723758	0.552916	0.472638	0.644871	0.610146	0.41641	0.512885	0.42147	0.451177	0.226848	0.37054	0.382996		0.569692	0.429592	0.407692	0.439512	0.488965	0.33407
965.271	983.285	976.234	987.245	983.671	985.66	990.484	985.394	986.225	997.926	977.162	979.439	985.528	1002.54		18.0144	10.9631	21.9736	18.4	20.3893	25.2133	20.1233	20.9539	32.6554	11.8913	14.1676	20.2568	37.2704		1.18616		0.688839	0.36875	0.520958	0.633405	0.530086	0.432951	0.498062	0.398761	0.518749	0.246169	0.333687	0.372667		0.515298	0.194627	0.461963	0.421414	0.384019	0.352945
964.122	981.515	977.13	986.667	984.189	985.9	990.087	986.414	987.044	994.44	975.23	979.479	983.931	1002.08		17.3933	13.0083	22.5446	20.067	21.7783	25.9647	22.2917	22.9218	30.3176	11.1077	15.3571	19.8084	37.9561		1.16473		0.653075	0.429638	0.524839	0.678311	0.555969	0.437799	0.541764	0.428331	0.472912	0.225793	0.355169	0.357834		0.459587	0.27231	0.466323	0.492288	0.417948	0.358478
965.943	982.429	977.861	986.13	981.028	982.646	990.643	985.846	986.555	995.65	975.563	980.171	984.35	1002.62		16.4857	11.9172	20.187	15.0845	16.703	24.6996	19.9028	20.6114	29.7067	9.61972	14.2278	18.4062	36.6789		1.20529		0.64055	0.407307	0.486319	0.527646	0.441252	0.430969	0.500548	0.398569	0.479518	0.202355	0.340509	0.344082		0.440078	0.243819	0.423058	0.254498	0.267572	0.350685
965.087	983.659	981.308	984.521	985.17	985.076	989.276	986.85	983.664	998.991	974.177	979.161	988.316	1001.88		18.5725	16.2219	19.4346	20.083	19.9894	24.189	21.7637	18.5774	33.9043	9.08999	14.074	23.2293	36.7968		1.20143		0.71932	0.552655	0.466692	0.700238	0.526378	0.420708	0.545595	0.358086	0.545521	0.190599	0.335748	0.432853		0.562779	0.42926	0.401015	0.526896	0.379158	0.338975
965.29	981.903	974.484	985.849	980.935	983.966	988.329	985.265	985.228	999.175	975.739	980.104	983.194	1002.03		16.6125	9.19442	20.5591	15.6453	18.6759	23.039	19.9753	19.9379	33.8854	10.4493	14.8135	17.9039	36.7417		1.20323		0.644374	0.31371	0.494436	0.546327	0.492527	0.401308	0.501513	0.384886	0.546034	0.21943	0.35392	0.33412		0.446034	0.124404	0.432175	0.283982	0.334786	0.316838
964.868	980.983	978.402	989.754	985.294	987.459	987.841	984.992	987.637	995.113	976.983	980.6	986.995	1002.17		16.1147	13.5337	24.8856	20.4259	22.5909	22.9727	20.1237	22.7693	30.2449	12.1149	15.7316	22.127	37.3006		1.1852		0.6157	0.454846	0.589519	0.702576	0.586848	0.394157	0.497669	0.432958	0.480068	0.250595	0.370224	0.406744		0.401367	0.304472	0.538968	0.530585	0.458426	0.308678
964.624	977.863	976.076	989.323	980.78	984.995	987.032	984.306	990.223	997.552	974.773	980.304	987.212	1002.17		13.239	11.452	24.6995	16.1561	20.3717	22.4079	19.682	25.5997	32.9278	10.1494	15.6807	22.5882	37.5443		1.17751		0.502542	0.382384	0.581312	0.552102	0.525764	0.38197	0.483585	0.483618	0.519261	0.208576	0.36663	0.412526		0.2251	0.212022	0.52975	0.293098	0.378354	0.294772
964.952	981.915	978.305	985.143	978.966	984.57	989.534	985.892	984.256	998.333	977.801	978.064	986.914	1002.05		16.9629	13.3524	20.1905	14.0139	19.6174	24.5822	20.9393	19.3036	33.3811	12.8484	13.1121	21.9615	37.0953		1.19176		0.651694	0.451236	0.480943	0.484695	0.512425	0.424106	0.520705	0.36909	0.532781	0.267238	0.310285	0.405936		0.457436	0.299866	0.41702	0.18671	0.360869	0.342853
965.762	981.685	979.497	986.634	980.846	982.601	986.887	986.586	986.563	996.446	976.639	980.274	985.434	1001.77		15.9235	13.7352	20.8719	15.0837	16.8389	21.1254	20.8246	20.8015	30.6843	10.8769	14.5121	19.6718	36.0129		1.22758		0.630147	0.478122	0.512116	0.537374	0.453067	0.375422	0.533416	0.409683	0.504458	0.233031	0.353735	0.374541		0.423872	0.334168	0.452033	0.269852	0.283061	0.2873
965.979	976.599	978.718	987.216	982.119	985.722	986.234	985.287	985.856	995.373	977.372	979.889	985.663	1002.32		10.6192	12.739	21.236	16.1395	19.7429	20.2544	19.3079	19.8764	29.3936	11.3923	13.909	19.684	36.3409		1.2165		0.416446	0.439443	0.516348	0.569799	0.526409	0.356695	0.490103	0.387931	0.478877	0.241871	0.335975	0.371391		0.090985	0.28482	0.456785	0.321028	0.379199	0.26593
965.426	981.75	981.863	985.039	983.25	984.157	988.278	986.23	986.944	996.104	976.648	980.068	986.668	1001.82		16.3242	16.4371	19.613	17.8242	18.7315	22.8525	20.8043	21.518	30.678	11.222	14.6424	21.2424	36.3915		1.21481		0.639284	0.566224	0.476222	0.628402	0.498747	0.401889	0.527353	0.419386	0.499107	0.237924	0.353199	0.400237		0.438105	0.446572	0.411718	0.413519	0.342939	0.317502
[truncated: 6 more columns]

## Sheet: MP-4pm1
Background	syp-4(S269D)1-MP_n1	syp-4(S269D)1-MP_n2	syp-4(S269D)1-MP_n3	syp-4(S269D)1-MP_n4	syp-4(S269D)1-MP_n5	syp-4(S269D)1-MP_n6	syp-4(S269D)1-MP_n7	syp-4(S269D)1-MP_n8	syp-4(S269D)1-MP_n9	syp-4(S269D)1-MP_n10	syp-4(S269D)1-MP_n11	Unfrapped nuclei		syp-4(S269D)1-MP_n1	syp-4(S269D)1-MP_n2	syp-4(S269D)1-MP_n3	syp-4(S269D)1-MP_n4	syp-4(S269D)1-MP_n5	syp-4(S269D)1-MP_n6	syp-4(S269D)1-MP_n7	syp-4(S269D)1-MP_n8	syp-4(S269D)1-MP_n9	syp-4(S269D)1-MP_n10	syp-4(S269D)1-MP_n11	unfrapped nuclei		ROI2		syp-4(S269D)1-MP_n1	syp-4(S269D)1-MP_n2	syp-4(S269D)1-MP_n3	syp-4(S269D)1-MP_n4	syp-4(S269D)1-MP_n5	syp-4(S269D)1-MP_n6	syp-4(S269D)1-MP_n7	syp-4(S269D)1-MP_n8	syp-4(S269D)1-MP_n9	syp-4(S269D)1-MP_n10	syp-4(S269D)1-MP_n11		syp-4(S269D)1-MP_n1	syp-4(S269D)1-MP_n2	syp-4(S269D)1-MP_n3	syp-4(S269D)1-MP_n4	syp-4(S269D)1-MP_n5	syp-4(S269D)1-MP_n6	syp-4(S269D)1-MP_n7	syp-4(S269D)1-MP_n8	syp-4(S269D)1-MP_n9
969.306	1003.03	1001.79	1028.97	1024.02	1001.14	1005.36	1029.82	1007.06	1025.6	1020.09	1010.86	1005.68		33.7207	32.4843	59.6624	54.7135	31.8293	36.0512	60.5171	37.7533	56.2935	50.7792	41.5514	36.373		0.961311		0.965862	1.0127	0.974651	0.927596	0.97257	1.02953	0.945852	1.08801	0.979512	0.886908	1.13225		0.959555	1.01536	0.970023	0.913487	0.959535	1.03919	0.941709	1.10328	0.978417
969.329	1002.73	998.517	1027.36	1028.02	1000.42	1000.6	1031.82	998.29	1023.53	1028.63	998.334	1002.89		33.403	29.1876	58.0293	58.6909	31.0924	31.2737	62.4954	28.9605	54.2015	59.2991	29.0049	33.5586		1.04193		1.037	0.986236	1.02747	1.07848	1.02973	0.967995	1.05869	0.904607	1.02221	1.12258	0.856654		1.04384	0.983352	1.03249	1.09377	1.04386	0.957521	1.06318	0.888059	1.02339
968.768	973.708	973.81	977.343	977.496	978.334	976.602	972.894	973.423	971.414	989.125	982.043	1001.77		4.93967	5.04167	8.57527	8.72827	9.56617	7.83417	4.12637	4.65447	2.64577	20.3567	13.2745	33.0036		1.05945		0.155932	0.17322	0.154388	0.163084	0.322144	0.246564	0.0710773	0.147831	0.0507366	0.391848	0.398652		0	0	0	0	0	0	0	0	0
968.724	977.974	980.485	980.011	980.975	979.683	974.95	974.659	975.952	973.019	989.037	982.602	1003.11		9.24961	11.7607	11.2864	12.2508	10.9586	6.22581	5.93461	7.22701	4.29421	20.3121	13.8772	34.3868		1.01684		0.280239	0.387817	0.195025	0.219693	0.35419	0.188062	0.0981125	0.220305	0.0790355	0.375262	0.399989		0.147272	0.259558	0.0480566	0.0676403	0.0472757	-0.0776466	0.0291038	0.085046	0.0298113
968.747	974.196	977.044	975.328	975.885	982.509	975.79	973.652	979.519	975.066	985.111	984.908	1003.13		5.44877	8.29767	6.58167	7.13847	13.7619	7.04317	4.90517	10.7727	6.31937	16.3646	16.1615	34.388		1.0168		0.165078	0.273612	0.113725	0.128009	0.444778	0.212745	0.0810908	0.328378	0.116305	0.302322	0.465813		0.010836	0.121425	-0.0480871	-0.0419089	0.180915	-0.0448864	0.0107796	0.211867	0.0690727
969.007	979.377	980.936	979.596	976.454	981.003	977.897	973.357	978.851	975.243	984.322	986.308	1004.44		10.3694	11.9285	10.5888	7.44661	11.9958	8.88961	4.34931	9.84341	6.23591	15.3149	17.3009	35.4337		0.986797		0.304885	0.38173	0.177566	0.129594	0.376259	0.260594	0.0697797	0.291197	0.111382	0.274581	0.483939		0.17647	0.252195	0.0274091	-0.040015	0.0798326	0.0186217	-0.00139698	0.168237	0.0638867
968.115	979.387	983.623	983.159	976.623	987.063	979.481	974.481	983.016	979.92	982.599	987.162	1005.04		11.2721	15.5074	15.0437	8.50747	18.9478	11.3657	6.36577	14.9012	11.8053	14.4839	19.0467	36.9216		0.94703		0.318069	0.47626	0.242104	0.14209	0.570362	0.319752	0.0980156	0.423056	0.202361	0.249216	0.511301		0.19209	0.36653	0.10373	-0.0250844	0.366182	0.0971385	0.0289994	0.32297	0.159728
968.31	979.316	981.693	985.547	980.409	981.032	977.392	977.32	982.555	980.427	985.188	988.609	1005.67		11.0066	13.3838	17.2378	12.0993	12.7225	9.08227	9.00997	14.2456	12.1174	16.8786	20.2994	37.3599		0.935918		0.306933	0.406217	0.274159	0.199709	0.378476	0.252514	0.137101	0.399698	0.205274	0.287013	0.538535		0.178897	0.281813	0.141638	0.0437617	0.0831035	0.00789783	0.0710759	0.295559	0.162797
969.027	984.642	981.902	986.995	983.371	979.796	978.295	979.629	981.673	981.642	981.777	988.026	1004.7		15.6151	12.8749	17.9683	14.3443	10.7691	9.26859	10.6019	12.6461	12.6151	12.75	18.9998	35.6703		0.980251		0.456074	0.409282	0.299315	0.24798	0.335541	0.269901	0.168967	0.371627	0.223828	0.227078	0.527934		0.35559	0.28552	0.171386	0.101439	0.0197638	0.0309745	0.105379	0.262619	0.182343
968.974	986.514	981.509	988.577	983.756	980.575	978.926	985.284	982.013	985.919	982.379	987.445	1006.18		17.5403	12.5351	19.603	14.7826	11.6011	9.95267	16.3105	13.0393	16.9456	13.4054	18.4715	37.2039		0.939842		0.491185	0.382053	0.313084	0.245022	0.346563	0.277874	0.249231	0.367386	0.288269	0.228909	0.492097		0.397188	0.252586	0.18767	0.0979049	0.0360243	0.0415571	0.191785	0.257642	0.250228
969.147	987.366	984.702	989.44	984.801	983.593	980.948	982.864	979.764	982.064	983.568	988.983	1006.79		18.2186	15.5542	20.2926	15.6537	14.4456	11.8011	13.7168	10.6167	12.9172	14.4207	19.8358	37.6393		0.928972		0.504278	0.468588	0.320349	0.256459	0.426546	0.32567	0.207174	0.295668	0.217198	0.243397	0.52233		0.4127	0.357251	0.196261	0.111571	0.154018	0.104994	0.14651	0.173483	0.175359
969.434	988.181	989.996	986.919	981.005	984.607	978.037	978.85	982.316	985.512	984.467	989.427	1006.47		18.747	20.5622	17.4847	11.5702	15.1725	8.60223	9.41553	12.8818	16.0778	15.0327	19.9922	37.0397		0.944009		0.527305	0.62949	0.280491	0.192627	0.455264	0.241235	0.144511	0.364559	0.27472	0.257835	0.534972		0.439981	0.551863	0.149126	0.0353006	0.196384	-0.00707225	0.0790526	0.254324	0.235955
969.435	981.916	988.72	990.022	981.556	985.709	980.848	986.095	979.924	985.591	985.658	985.487	1006.58		12.4814	19.2853	20.5871	12.1211	16.274	11.4134	16.6603	10.4888	16.1563	16.2232	16.0521	37.1446		0.941343		0.35008	0.588732	0.329328	0.20123	0.486934	0.319165	0.254984	0.295999	0.275282	0.277467	0.428327		0.230015	0.502567	0.206879	0.0455791	0.243105	0.09636	0.197978	0.173871	0.236547
968.913	988.532	988.24	989.979	980.89	983.252	980.526	983.947	984.456	982.504	984.406	983.264	1007.52		19.6189	19.327	21.0657	11.9766	14.339	11.6125	15.0338	15.5425	13.5908	15.4931	14.3506	38.6077		0.905671		0.529418	0.567646	0.324213	0.191295	0.41278	0.312428	0.221371	0.421993	0.222794	0.254939	0.368413		0.442484	0.477062	0.200831	0.0337089	0.13371	0.0874187	0.161793	0.321722	0.181253
968.784	989.052	989.278	989.074	980.491	983.954	979.669	983.251	981.284	984.273	983.924	985.284	1008.96		20.2676	20.4938	20.2897	11.7061	15.1692	10.8842	14.4668	12.4998	15.488	15.1393	16.5	40.1749		0.870339		0.525588	0.578434	0.300088	0.179681	0.419644	0.28141	0.204712	0.326142	0.24399	0.239399	0.407068		0.437946	0.490111	0.172301	0.0198312	0.143836	0.04625	0.143859	0.209243	0.203582
969.909	988.523	989.111	990.45	983.912	983.443	979.696	982.847	984.274	985.648	985.178	984.549	1008.41		18.6138	19.2018	20.5411	14.003	13.5346	9.78733	12.9385	14.3656	15.7393	15.269	14.6398	38.5005		0.90819		0.503694	0.565538	0.317019	0.224284	0.390708	0.264055	0.191048	0.391125	0.258732	0.251951	0.376883		0.412007	0.474513	0.192323	0.0731262	0.101149	0.0232157	0.12915	0.285499	0.219112
970.026	988.813	987.158	989.525	983.282	982.148	980.942	983.888	983.582	983.012	983.195	986.261	1009.47		18.7878	17.1322	19.4994	13.2564	12.1227	10.9159	13.8625	13.5566	12.9868	13.1698	16.2355	39.4489		0.886358		0.496181	0.492454	0.293708	0.207222	0.341538	0.287425	0.199771	0.360226	0.208353	0.212089	0.407915		0.403106	0.386117	0.164756	0.0527392	0.028611	0.0542326	0.138541	0.24924	0.166041
969.267	987.446	988.596	990.068	986.045	989.452	980.163	983.033	986.04	983.619	984.797	986.987	1008.75		18.1789	19.3288	20.8009	16.778	20.185	10.8953	13.7654	16.7729	14.3518	15.5295	17.7196	39.484		0.885569		0.479671	0.555097	0.313031	0.262037	0.568172	0.286625	0.198194	0.445291	0.230046	0.249866	0.444805		0.383546	0.461885	0.187608	0.118235	0.36295	0.0531716	0.136843	0.349062	0.188893
969.844	987.078	987.742	990.828	988.234	987.37	980.087	984.169	985.701	983.054	984.881	986.284	1009.47		17.2338	17.8981	20.9837	18.3903	17.5264	10.243	14.3252	15.8569	13.2101	15.0371	16.4404	39.629		0.882329		0.453071	0.512131	0.314628	0.286167	0.491534	0.268481	0.205501	0.419434	0.210972	0.241059	0.411185		0.352032	0.409916	0.189496	0.147068	0.249891	0.0290894	0.144709	0.31872	0.1688
970.377	988.127	986.99	991.098	987.07	987.5	981.034	983.351	987.98	983.14	984.006	987.391	1009.81		17.7501	16.6137	20.7216	16.6934	17.1233	10.6568	12.974	17.6034	12.7629	13.6289	17.0146	39.4315		0.886749		0.468983	0.477761	0.312255	0.261062	0.482635	0.280727	0.18705	0.467964	0.204851	0.219579	0.427679		0.370883	0.368346	0.186689	0.117071	0.236763	0.0453427	0.124846	0.375668	0.162352
969.688	989.629	988.171	990.976	987.956	989.037	983.743	982.781	986.678	984.462	985.072	991.764	1009.37		19.9404	18.4828	21.2872	18.2672	19.3487	14.0543	13.0925	16.9896	14.7736	15.384	22.0756	39.6865		0.881051		0.523468	0.528093	0.318717	0.28384	0.541853	0.367846	0.187545	0.448742	0.235599	0.246262	0.551324		0.435434	0.429222	0.194331	0.144288	0.324123	0.160972	0.12538	0.353112	0.194743
970.146	987.634	987.386	989.284	985.447	988.298	982.963	981.568	988.6	981.328	985.214	988.454	1009.77		17.4883	17.2405	19.1383	15.3014	18.1522	12.8173	11.4219	18.4538	11.1819	15.0682	18.3084	39.6194		0.882543		0.459873	0.493433	0.287027	0.238159	0.509207	0.336037	0.163891	0.488243	0.178624	0.241616	0.458016		0.36009	0.387301	0.156856	0.0897048	0.275963	0.118753	0.0999153	0.399465	0.134722
970.204	989.254	985.074	988.06	988.415	987.302	983.258	981.779	987.315	984.409	986.488	988.437	1010.25		19.0504	14.8703	17.8566	18.2109	17.0984	13.0545	11.575	17.1117	14.2058	16.2842	18.2335	40.0507		0.87304		0.495556	0.421014	0.264922	0.280392	0.474482	0.338571	0.1643	0.44786	0.224485	0.258303	0.451231		0.402366	0.29971	0.130714	0.140168	0.224735	0.122116	0.100355	0.352076	0.183035
970.406	987.205	982.979	988.416	989.785	984.474	983.047	982.332	987.347	981.599	986.583	987.29	1010.02		16.799	12.5724	18.0099	19.3785	14.068	12.6402	11.9256	16.9408	11.1922	16.1762	16.8835	39.6097		0.882758		0.441853	0.359916	0.270169	0.30169	0.394732	0.331473	0.17116	0.448321	0.178831	0.259445	0.422471		0.338742	0.225811	0.13692	0.165616	0.107085	0.112696	0.10774	0.352617	0.134941
970.276	983.691	983.905	986.653	989.232	987	981.71	981.736	990.204	980.888	989.226	986.344	1009.72		13.415	13.6291	16.3766	18.9559	16.7236	11.4343	11.4597	19.9283	10.6116	18.9495	16.0678	39.4415		0.886523		0.354352	0.391832	0.246716	0.29637	0.471247	0.30113	0.165175	0.529632	0.170278	0.305222	0.403776		0.235076	0.264413	0.109185	0.159259	0.219964	0.0724226	0.101297	0.448034	0.12593
969.902	986.516	982.612	987.227	988.878	987.4	979.303	982.741	988.179	983.386	989.471	985.792	1010		16.6146	12.7107	17.3259	18.976	17.4984	9.40169	12.8395	18.2774	13.4846	19.569	15.8906	40.0977		0.872015		0.431686	0.359448	0.256746	0.291829	0.485011	0.243548	0.182034	0.477807	0.212838	0.310042	0.392788		0.326696	0.225244	0.121046	0.153833	0.240268	-0.00400324	0.119447	0.387218	0.170765
970.541	984.771	982.976	988.606	991.947	984.472	981.221	983.45	991.101	981.091	990.131	986.34	1010.18		14.2304	12.4353	18.065	21.406	13.9311	10.6801	12.9087	20.5594	10.5496	19.5903	15.7987	39.6382		0.882125		0.374026	0.355737	0.270802	0.333017	0.390612	0.279872	0.185137	0.543694	0.168443	0.313978	0.395044		0.258385	0.220756	0.137669	0.203046	0.101007	0.0442089	0.122787	0.464536	0.123998
970.097	987.373	987.799	989.917	991.166	984.101	979.737	983.936	989.233	983.337	990.915	985.902	1010.3		17.2761	17.7023	19.8204	21.0689	14.0046	9.64022	13.8392	19.1362	13.2402	20.8179	15.8048	40.2053		0.869681		0.447672	0.499267	0.292925	0.323149	0.387134	0.249058	0.195683	0.498919	0.208422	0.328947	0.389622		0.345636	0.394357	0.163831	0.191256	0.0958754	0.00331086	0.13414	0.411994	0.166113
969.47	988.127	985.386	989.351	991.339	985.893	980.827	983.384	988.307	980.524	989.609	984.664	1009.82		18.657	15.9165	19.8817	21.8695	16.423	11.3569	13.9145	18.8367	11.0537	20.139	15.1946	40.3527		0.866506		0.481688	0.44726	0.292757	0.334202	0.452326	0.292337	0.196028	0.489316	0.173366	0.317058	0.37321		0.385936	0.331454	0.163632	0.204463	0.192051	0.0607522	0.134511	0.400724	0.129184
970.284	988.389	986.991	989.919	990.099	984.251	981.653	983.961	989.503	980.971	991.741	985.242	1010.06		18.1053	16.7071	19.6353	19.8155	13.9672	11.3692	13.6773	19.2188	10.6872	21.4575	14.9577	39.7717		0.879164		0.474273	0.476335	0.293353	0.307237	0.390308	0.296929	0.195501	0.506535	0.170067	0.342749	0.372759		0.377151	0.366621	0.164336	0.172244	0.100558	0.0668471	0.133944	0.42093	0.125708
969.361	984.642	988.483	989.236	991.753	983.928	979.742	984.28	988.776	984.242	990.576	985.119	1010.29		15.2804	19.1221	19.8748	22.3914	14.5666	10.3805	14.919	19.4145	14.8805	21.2144	15.7577	40.93		0.854284		0.388946	0.52976	0.288528	0.337352	0.395538	0.263435	0.207215	0.497212	0.230094	0.329276	0.381582		0.276062	0.431239	0.158631	0.208226	0.108275	0.022392	0.146555	0.40999	0.188944
969.677	985.714	989.826	990.759	990.623	985.375	980.172	985.077	989.375	980.753	991.429	986.762	1010.82		16.0377	20.1499	21.0822	20.9468	15.6983	10.495	15.401	19.6982	11.0761	21.7526	17.0855	41.1418		0.849884		0.406121	0.55536	0.304481	0.313962	0.424074	0.26497	0.212809	0.50188	0.170386	0.335891	0.411606		0.296409	0.462203	0.177496	0.180279	0.150371	0.024429	0.152576	0.415468	0.126044
970.049	987.646	990.446	990.145	991.213	982.813	979.941	985.205	989.139	980.741	990.903	988.274	1010.08		17.5967	20.397	20.0956	21.1633	12.7641	9.89176	15.1551	19.0892	10.6921	20.8538	18.2243	40.0258		0.873583		0.458024	0.577846	0.298324	0.326052	0.354423	0.256703	0.21525	0.499925	0.169065	0.330991	0.451282		0.3579	0.489399	0.170215	0.194725	0.04762	0.0134578	0.155204	0.413174	0.124652
970.168	987.305	986.488	989.727	991.229	985.251	979.418	983.289	988.021	982.434	989.089	984.597	1010.15		17.1374	16.3201	19.5593	21.0609	15.0828	9.24969	13.121	17.8534	12.2664	18.9213	14.4295	39.9836		0.874504		0.44654	0.462836	0.290669	0.324817	0.41925	0.240294	0.186556	0.468055	0.194163	0.300636	0.35769		0.344295	0.350293	0.161163	0.193249	0.143255	-0.00832145	0.124315	0.375775	0.151092
970.546	984.771	987.295	990.503	991.921	984.192	980.325	983.46	987.822	984.204	991.471	983.999	1009.88		14.2255	16.749	19.9566	21.3751	13.6455	9.77944	12.9144	17.2757	13.658	20.9247	13.4533	39.336		0.888901		0.37677	0.482821	0.301457	0.335091	0.385544	0.258239	0.186642	0.460367	0.21975	0.337942	0.338983		0.261635	0.374465	0.17392	0.205525	0.0935299	0.0154956	0.124407	0.366753	0.178047
969.878	986.149	984.344	990.777	990.333	984.153	982.222	984.283	993.877	981.929	991.247	986.59	1010.71		16.2717	14.4663	20.899	20.4551	14.2754	12.3449	14.4054	23.9996	12.0511	21.3696	16.7122	40.8352		0.856266		0.415141	0.401706	0.304101	0.308895	0.388532	0.314015	0.200546	0.616066	0.186777	0.332455	0.405636		0.307095	0.276357	0.177047	0.174224	0.0979381	0.0895248	0.139375	0.549462	0.143311
970.223	988.389	984.044	990.715	990.066	985.475	980.361	986.478	990.601	982.507	990.842	985.55	1010.43		18.1658	13.8205	20.4919	19.8428	15.252	10.138	16.2543	20.3775	12.2832	20.6186	15.327	40.2057		0.869673		0.470722	0.389783	0.302847	0.30434	0.421612	0.261917	0.229829	0.531277	0.193355	0.325794	0.37784		0.372945	0.261935	0.175563	0.168782	0.146739	0.0203769	0.170899	0.449965	0.150241
970.249	983.452	983.031	988.105	991.332	983.146	980.446	985.144	989.612	982.002	990.639	985.764	1010.2		13.2026	12.7816	17.8557	21.0826	12.8964	10.1971	14.895	19.3629	11.7528	20.3897	15.5145	39.9539		0.875154		0.34427	0.362755	0.26555	0.325394	0.358743	0.265104	0.211937	0.508007	0.186172	0.324208	0.384873		0.223131	0.229244	0.131457	0.193938	0.0539922	0.0246075	0.151637	0.422657	0.142674
969.574	981.398	983.751	987.649	991.424	986.155	980.825	984.935	988.796	983.798	991.381	989.594	1010.23		11.8242	14.1771	18.0753	21.8497	16.5811	11.251	15.3608	19.2219	14.2242	21.8072	20.02	40.6564		0.860033		0.302999	0.395408	0.264171	0.331406	0.453271	0.287449	0.214788	0.495593	0.221427	0.340756	0.48806		0.174236	0.268738	0.129826	0.201122	0.193444	0.0542644	0.154707	0.408091	0.179813
970.657	987.305	985.455	990.978	991.106	986.922	979.997	985.146	990.864	980.576	990.541	986.513	1010.09		16.6481	14.7973	20.3208	20.4487	16.2652	9.33957	14.4892	20.2064	9.91907	19.8842	15.8555	39.4346		0.886679		0.439829	0.425491	0.30619	0.319766	0.45841	0.246007	0.208877	0.537117	0.159193	0.320333	0.39851		0.336345	0.305125	0.179517	0.187213	0.201026	-0.000739056	0.148344	0.456818	0.114253
970.344	984.771	987.711	990.973	990.373	985.211	980.861	984.471	988.837	981.896	990.616	985.659	1010.49		14.4277	17.3668	20.629	20.0293	14.8674	10.5167	14.1271	18.4929	11.5524	20.2722	15.3156	40.1506		0.870866		0.374371	0.490471	0.30529	0.307622	0.411543	0.272072	0.200025	0.482803	0.1821	0.32076	0.378076		0.258793	0.383718	0.178453	0.172703	0.131885	0.0338562	0.138814	0.393082	0.138385
970.354	989.445	986.581	990.62	990.751	987.069	980.229	984.265	988.56	984.775	991.376	984.183	1010.78		19.0916	16.2273	20.266	20.3971	16.7152	9.87468	13.9113	18.206	14.4211	21.0219	13.8294	40.4235		0.864988		0.492046	0.455196	0.297894	0.311156	0.459569	0.253739	0.19564	0.472105	0.225785	0.330377	0.339084		0.398208	0.341053	0.169707	0.176926	0.202735	0.00952327	0.134094	0.380527	0.184405
969.54	987.866	986.217	990.044	990.651	986.52	980.653	984.427	991.867	983.672	990.817	985.426	1010.2		18.3261	16.6778	20.5048	21.1114	16.9805	11.1135	14.8876	22.3278	14.1326	21.2772	15.8865	40.6616		0.859922		0.46955	0.465092	0.299638	0.320167	0.46413	0.283898	0.208144	0.575596	0.219972	0.332432	0.38724		0.371556	0.353022	0.171769	0.187693	0.209464	0.0495515	0.147554	0.501972	0.17828
969.707	987.05	988.814	990.982	989.527	988.9	981.639	983.388	989.894	983.619	990.516	985.538	1011.09		17.3434	19.107	21.2754	19.8197	19.1934	11.9322	13.6814	20.1873	13.9121	20.8096	15.8315	41.3811		0.844971		0.436648	0.523574	0.305495	0.29535	0.515494	0.299515	0.187955	0.51137	0.212776	0.319473	0.37919		0.332575	0.423756	0.178695	0.158041	0.285238	0.0702791	0.125821	0.426604	0.1707
969.922	982.662	985.551	989.144	990.476	984.649	979.581	982.728	987.488	984.212	990.279	990.649	1011.31		12.7402	15.6284	19.222	20.5536	14.7269	9.65912	12.8058	17.5657	14.2901	20.3569	20.7267	41.3834		0.844923		0.320736	0.428228	0.275994	0.306271	0.395511	0.242443	0.175916	0.444936	0.218545	0.312505	0.496412		0.19525	0.308434	0.143809	0.171089	0.108234	-0.00546996	0.11286	0.348645	0.176777
969.853	981.031	989.357	987.265	990.155	987.717	981.619	983.752	988.908	983.099	989.144	988.15	1010.71		11.1775	19.5041	17.4121	20.3014	17.8635	11.7659	13.8989	19.0548	13.2453	19.291	18.2964	40.8543		0.855866		0.285038	0.541344	0.253245	0.30643	0.48596	0.299146	0.193404	0.488904	0.205189	0.299977	0.443879		0.152958	0.44525	0.116905	0.171279	0.241669	0.0697904	0.131687	0.400241	0.162707
970.4	985.428	988.963	989.332	989.364	987.304	980.884	984.006	986.497	985.17	989.37	985.458	1010.1		15.0281	18.5625	18.9316	18.964	16.9036	10.4832	13.6055	16.0969	14.7695	18.9692	15.0573	39.6973		0.880812		0.394402	0.530226	0.28337	0.294586	0.473252	0.274305	0.194841	0.425048	0.235471	0.303572	0.375944		0.282525	0.431802	0.15253	0.157127	0.222921	0.0368189	0.133233	0.325307	0.194608
969.782	985.307	986.518	990.088	989.713	982.827	981.029	985.1	986.561	981.982	989.556	988.108	1010.28		15.5257	16.736	20.306	19.9315	13.0453	11.2471	15.318	16.779	12.2	19.7741	18.3264	40.4995		0.863364		0.399391	0.468584	0.297922	0.303482	0.357995	0.288461	0.215019	0.434284	0.190652	0.310183	0.448502		0.288436	0.357246	0.169739	0.167757	0.0528887	0.0556087	0.154955	0.336145	0.147393
968.832	986.192	986.842	989.154	989.525	984.153	981.173	985.214	984.161	983.304	990.174	986.589	1010.93		17.3601	18.0102	20.3225	20.6938	15.3209	12.3416	16.3819	15.3289	14.4719	21.342	17.7569	42.1005		0.830533		0.429598	0.485084	0.286825	0.303107	0.404454	0.304496	0.221208	0.381664	0.217555	0.322047	0.418039		0.324223	0.377203	0.156617	0.167309	0.121428	0.0768903	0.161618	0.274397	0.175734
970.058	983.264	988.231	988.341	990.884	980.72	981.048	984.258	983.645	984.83	990.258	986.328	1010.47		13.206	18.173	18.2836	20.8267	10.6629	10.9904	14.2006	13.5877	14.7726	20.2004	16.2701	40.4078		0.865324		0.34049	0.509974	0.268859	0.317833	0.293281	0.282518	0.199786	0.352484	0.231378	0.31759	0.399083		0.218653	0.407307	0.13537	0.184904	-0.04258	0.0477204	0.138557	0.240155	0.190297
969.266	986.93	986.735	987.714	989.465	984.026	980.936	983.898	985.427	986.45	990.189	987.446	1010.45		17.6633	17.4684	18.4476	20.1987	14.7598	11.6692	14.6311	16.1603	17.184	20.9227	18.18	41.1823		0.849051		0.446849	0.480983	0.26617	0.302453	0.398331	0.294327	0.201973	0.411337	0.264086	0.32276	0.437545		0.34466	0.372243	0.13219	0.166527	0.112395	0.0633939	0.140911	0.309218	0.224753
969.77	983.07	987.254	987.631	989.911	982.314	978.986	983.476	984.544	988.177	990.773	987.369	1010.57		13.3004	17.484	17.8609	20.1413	12.5446	9.21679	13.706	14.7742	18.4076	21.0033	17.5988	40.8018		0.856968		0.339612	0.485901	0.260107	0.304405	0.341704	0.234638	0.190966	0.379562	0.285528	0.327024	0.427505		0.217613	0.378191	0.12502	0.16886	0.0288566	-0.0158285	0.129062	0.27193	0.247341
970.02	986.489	986.708	988.819	992.33	981.783	980.741	986.051	985.112	989.446	989.7	984.4	1010.26		16.4688	16.6874	18.7991	22.3101	11.7629	10.7206	16.0312	15.0922	19.4262	19.6795	14.3797	40.2352		0.869035		0.426435	0.470293	0.277625	0.341931	0.324923	0.276764	0.226508	0.393191	0.305571	0.310727	0.354226		0.320476	0.359313	0.145737	0.213698	0.00410049	0.0400838	0.167324	0.287924	0.268455
969.045	988.139	986.325	989.867	987.633	983.111	979.496	985.238	986.161	989.04	990.712	987.842	1010.37		19.0942	17.2803	20.8215	18.5881	14.0657	10.4514	16.1933	17.1161	19.9953	21.667	18.7968	41.3255		0.846107		0.481372	0.474154	0.299379	0.277371	0.378282	0.262696	0.222762	0.434155	0.306225	0.333083	0.45082		0.385562	0.363982	0.171463	0.136557	0.0828178	0.0214118	0.163291	0.335994	0.269144
968.66	985.421	986.883	990.419	990.292	981.707	979.246	985.521	983.019	987.391	990.647	981.47	1009.36		16.7609	18.2221	21.7583	21.6314	13.046	10.5858	16.8607	14.358	18.7304	21.9867	12.8097	40.6978		0.859157		0.429067	0.507708	0.317674	0.327762	0.356271	0.270179	0.235521	0.369813	0.291278	0.343211	0.311966		0.323594	0.404567	0.193098	0.196767	0.0503459	0.0313435	0.177026	0.26049	0.253398
969.073	989.242	987.116	990.569	988.564	981.809	978.773	984.522	984.356	987.596	989.94	986.405	1009.15		20.1685	18.0426	21.4953	19.491	12.7356	9.69967	15.4484	15.283	18.5221	20.8664	17.3313	40.0793		0.872415		0.524264	0.510463	0.318677	0.299886	0.353159	0.251382	0.219122	0.39971	0.292483	0.330749	0.428595		0.436377	0.407899	0.194283	0.16346	0.0457555	0.00639486	0.159373	0.295574	0.254667
969.909	986.086	983.465	990.589	989.385	979.1	979.915	984.945	984.063	987.997	991.197	983.986	1009.24		16.1777	13.5567	20.68	19.4765	9.19117	10.0064	15.0368	14.1543	18.0882	21.2883	14.0771	39.3311		0.889013		0.428527	0.390844	0.312422	0.305364	0.259722	0.264264	0.217342	0.377233	0.291065	0.343856	0.354743		0.322954	0.263218	0.186887	0.170006	-0.0920876	0.0234931	0.157456	0.269197	0.253173
969.802	984.384	984.105	989.618	989.364	982.324	978.698	990.336	982.704	989.34	991.697	986.905	1009.7		14.5819	14.3024	19.8158	19.562	12.5217	8.89585	20.5335	12.9014	19.5373	21.8951	17.1025	39.9026		0.87628		0.380723	0.406436	0.295078	0.302313	0.348768	0.231571	0.292541	0.338916	0.30988	0.348592	0.42481		0.266319	0.282077	0.166377	0.16636	0.0392776	-0.0198993	0.23841	0.224233	0.272994
968.537	986.554	986.381	990.051	986.455	982.95	979.128	988.131	982.067	988.792	990.127	985.722	1010.11		18.0169	17.8442	21.5141	17.9179	14.4135	10.5907	19.5941	13.5304	20.255	21.5901	17.1855	41.5752		0.841026		0.451484	0.486685	0.307479	0.265764	0.385307	0.264598	0.267926	0.34114	0.308339	0.329907	0.409699		0.350153	0.37914	0.181042	0.122689	0.0931814	0.0239362	0.211911	0.226844	0.271371
969.326	984.531	984.556	990.903	988.399	982.167	980.736	988.819	984.402	987.253	990.526	983.683	1010.68		15.2043	15.2293	21.5769	19.0722	12.8401	11.4096	19.4924	15.0754	17.9264	21.1999	14.3562	41.3554		0.845496		0.38303	0.417575	0.310017	0.284389	0.345072	0.286574	0.267953	0.382116	0.274342	0.325667	0.344069		0.269052	0.29555	0.184042	0.144943	0.0338247	0.0531035	0.211939	0.274927	0.235557
969.422	984.056	985.302	990.515	988.163	983.684	979.717	985.388	982.242	986.966	990.493	982.104	1010.05		14.6346	15.8806	21.0938	18.7417	14.2624	10.2951	15.966	12.8206	17.5445	21.0712	12.6822	40.6272		0.860651		0.375286	0.443238	0.308508	0.28447	0.390166	0.263216	0.223411	0.330788	0.27331	0.329492	0.309397		0.259878	0.326589	0.182258	0.14504	0.100349	0.0221019	0.16399	0.214696	0.23447
968.714	984.801	983.388	989.888	987.011	984.182	978.419	986.931	979.243	986.948	990.71	983.832	1009.8		16.0866	14.6738	21.1733	18.2971	15.4678	9.70507	18.2171	10.5285	18.2336	21.9962	15.1178	41.0847		0.851066		0.407925	0.404993	0.306221	0.274628	0.418428	0.245367	0.252071	0.268623	0.280881	0.340125	0.364708		0.298547	0.280332	0.179554	0.13328	0.142042	-0.00158859	0.194842	0.141746	0.242445
968.945	985.422	981.498	987.325	988.214	981.636	978.793	987.319	978.846	984.014	991.975	984.083	1010.32		16.4764	12.553	18.3794	19.269	12.6906	9.84753	18.3739	9.90103	15.0689	23.0291	15.1379	41.3785		0.845024		0.414845	0.344001	0.263928	0.287163	0.340864	0.247201	0.252436	0.250821	0.230483	0.35357	0.362602		0.306745	0.206562	0.129539	0.148258	0.0276174	0.000845872	0.195236	0.120856	0.189353
969.803	983.19	982.617	989.217	986.907	983.088	978.516	988.511	984.293	985.83	990.992	987.689	1010.45		13.3874	12.8148	19.4143	17.1045	13.285	8.71339	18.7083	14.4902	16.0276	21.189	17.8867	40.6523		0.860119		0.34309	0.357448	0.283769	0.259459	0.363203	0.222638	0.261621	0.373634	0.249525	0.331129	0.436097		0.221734	0.222825	0.153002	0.115155	0.0605719	-0.0317553	0.205124	0.264975	0.209413
968.949	984.408	981.25	990.128	988.112	979.396	978.942	988.258	980.533	986.081	990.884	984.436	1010.43		15.4587	12.3013	21.1796	19.1635	10.4477	9.99281	19.3094	11.5839	17.1325	21.9353	15.4868	41.4772		0.843012		0.388294	0.336301	0.303414	0.284911	0.279952	0.250251	0.264657	0.292754	0.261422	0.335974	0.370075		0.275289	0.197247	0.176234	0.145567	-0.0622423	0.00489354	0.208392	0.170064	0.221946
968.757	986.026	982.648	987.338	987.034	985.643	979.101	988.509	982.699	987.574	989.287	988.835	1010.42		17.2689	13.8907	18.5809	18.2765	16.8859	10.344	19.7518	13.9419	18.8167	20.5296	20.0778	41.6651		0.839211		0.431808	0.378041	0.264986	0.270499	0.450428	0.257879	0.2695	0.350759	0.285827	0.313026	0.47762		0.326841	0.247733	0.13079	0.128346	0.189251	0.0150177	0.213606	0.238131	0.247655
969.319	984.984	980.986	988.986	989.267	983.227	979.536	990.553	984.831	986.635	989.094	980.913	1009.22		15.6644	11.6665	19.6664	19.9482	13.9083	10.2165	21.2335	15.5118	17.3157	19.775	11.5938	39.8996		0.876345		0.40902	0.331558	0.292877	0.308305	0.387418	0.26597	0.302537	0.407521	0.274665	0.314862	0.288003		0.299843	0.191512	0.163773	0.173519	0.0962954	0.0257575	0.24917	0.30474	0.235897
969.288	985.561	980.786	990.084	988.666	981.739	980.899	988.746	983.322	986.243	988.538	981.82	1009.08		16.2734	11.4977	20.7963	19.3778	12.4506	11.6115	19.4582	14.0344	16.9554	19.2505	12.5323	39.7893		0.878776		0.426098	0.327665	0.310562	0.300318	0.347774	0.303123	0.27801	0.36973	0.269695	0.30736	0.312178		0.320077	0.186803	0.184687	0.163977	0.0378103	0.0750689	0.222767	0.260393	0.230661
968.433	984.794	980.639	990.527	990.538	983.637	978.956	989.288	977.956	989.168	988.33	984.191	1009.11		16.3608	12.2051	22.093	22.1043	15.2034	10.5226	20.8546	9.52223	20.734	19.896	15.7574	40.6772		0.859593		0.419037	0.340234	0.322725	0.335097	0.415397	0.268702	0.291458	0.245384	0.3226	0.310733	0.383948		0.311711	0.202005	0.199071	0.205532	0.137571	0.0293831	0.237243	0.114475	0.286394
968.344	982.21	982.297	989.864	988.146	979.646	979.586	987.959	981.483	986.27	987.071	984.509	1009.11		13.8659	13.9528	21.5199	19.8015	11.302	11.2417	19.6146	13.1386	17.926	18.7266	16.1652	40.7624		0.857795		0.354394	0.38814	0.313696	0.299559	0.308155	0.286465	0.273555	0.337869	0.278327	0.291858	0.393061		0.235126	0.259948	0.188393	0.163069	-0.0206365	0.0529584	0.21797	0.223004	0.239754
968.544	984.493	979.698	989.578	986.423	980.06	980.43	987.67	977.465	989.992	989.888	982.332	1009.78		15.9486	11.154	21.0335	17.8782	11.5159	11.8857	19.1255	8.92051	21.4471	21.3432	13.7873	41.2349		0.847966		0.402954	0.306727	0.303092	0.267364	0.310389	0.299404	0.263677	0.226768	0.329181	0.328826	0.3314		0.292656	0.161478	0.175853	0.1246	-0.0173415	0.0701322	0.207336	0.0926305	0.293327
968.096	984.113	982.24	988.888	985.948	980.88	979.764	987.269	979.394	988.499	987.802	985.333	1009.53		16.0171	14.1449	20.7924	17.8523	12.7849	11.6688	19.1739	11.2986	20.4037	19.7066	17.2377	41.4346		0.843879		0.402733	0.387098	0.298173	0.265689	0.34293	0.292522	0.263069	0.285836	0.311656	0.302148	0.412337		0.292395	0.258688	0.170036	0.122599	0.0306646	0.0609985	0.206683	0.161946	0.274865
968.568	986.386	981.023	987.245	987.229	979.469	978.644	986.934	980.119	987.004	989.833	984.459	1009.46		17.8174	12.4544	18.6769	18.6603	10.9009	10.0758	18.3663	11.5509	18.4359	21.2649	15.8908	40.8902		0.855115		0.453966	0.345375	0.271403	0.281413	0.29629	0.255952	0.255345	0.296111	0.285349	0.330382	0.385181		0.353093	0.208223	0.138378	0.141387	-0.0381405	0.0124608	0.198367	0.174003	0.247152
969.512	982.875	979.235	988.598	986.407	981.538	979.588	989.383	980.491	988.758	986.999	983.707	1009.6		13.3625	9.72265	19.0858	16.8949	12.0256	10.0752	19.871	10.9783	19.2457	17.4861	14.1946	40.0925		0.872128		0.347232	0.274984	0.282861	0.259857	0.333361	0.261027	0.28176	0.28703	0.303809	0.277077	0.35091		0.226641	0.123084	0.151929	0.115631	0.0165477	0.0191965	0.226803	0.163346	0.266598
968.287	981.473	978.201	988.016	989.122	983.749	979.776	989.794	983.304	986.935	985.775	982.817	1006.97		13.1853	9.91401	19.7289	20.8352	15.4615	11.4888	21.5068	15.017	18.6479	17.4878	14.5298	38.68		0.903977		0.355142	0.290636	0.303071	0.332166	0.444261	0.308522	0.316092	0.406963	0.305123	0.287224	0.372316		0.236012	0.142015	0.175829	0.20203	0.180152	0.0822343	0.263762	0.304085	0.267983
967.959	983.729	981.334	990.358	989.256	984.015	981.742	989.959	982.566	987.341	986.341	983.73	1006.89		15.7698	13.3747	22.3988	21.2968	16.0554	13.7831	22.0002	14.6072	19.3821	18.3815	15.7704	38.93		0.89817		0.422025	0.389569	0.341875	0.337344	0.458362	0.367755	0.321266	0.393314	0.315098	0.299963	0.401508		0.315251	0.261676	0.221717	0.208217	0.200954	0.160851	0.269333	0.288068	0.278491
967.961	984.407	978.212	987.242	987.321	986.577	981.659	989.177	982.475	988.83	989.61	981.462	1006.96		16.4466	10.2519	19.2813	19.3599	18.6169	13.6989	21.2165	14.5139	20.8697	21.6496	13.5019	38.9965		0.896641		0.439389	0.298103	0.293792	0.306142	0.530586	0.364888	0.309295	0.390137	0.338706	0.352693	0.343169		0.335823	0.151047	0.164855	0.170934	0.307502	0.157046	0.256446	0.28434	0.303361
967.123	982.048	980.359	989.198	989.63	985.275	980.497	989.453	981.931	988.096	986.474	981.344	1006.46		14.9246	13.2357	22.0743	22.5071	18.1514	13.374	22.3297	14.8077	20.9722	19.351	14.221	39.3381		0.888853		0.395262	0.38152	0.333426	0.352816	0.512824	0.353137	0.322697	0.394575	0.337412	0.312509	0.358307		0.283544	0.251941	0.211726	0.226704	0.281298	0.14145	0.270872	0.289548	0.301997
968.647	984.307	979.959	990.51	991.29	984.167	982.088	991.213	982.881	987.029	987.6	982.815	1006.98		15.6601	11.3121	21.8627	22.6429	15.5195	13.4408	22.5658	14.2336	18.3818	18.953	14.1675	38.3288		0.91226		0.425663	0.334659	0.338926	0.364292	0.450012	0.364247	0.334695	0.389266	0.303524	0.31414	0.366357		0.319561	0.195262	0.21823	0.240416	0.188637	0.156196	0.283788	0.283317	0.266298
968.432	983.453	980.841	991.483	990.471	984.262	981.969	990.595	983.541	989.342	986.399	983.893	1007.28		15.0209	12.4092	23.0513	22.0389	15.8302	13.5372	22.1629	15.1089	20.9106	17.9671	15.4614	38.8433		0.900176		0.402882	0.362255	0.35262	0.349879	0.452943	0.362002	0.324366	0.407732	0.340707	0.293856	0.394521		0.292571	0.228639	0.234424	0.223194	0.19296	0.153215	0.272669	0.304987	0.305469
967.077	982.121	981.761	990.778	989.737	984.704	981.618	990.462	983.404	990.864	988.231	983.986	1008.38		15.0444	14.6843	23.7012	22.6605	17.6272	14.5413	23.3851	16.3276	23.7873	21.1544	16.909	41.3058		0.84651		0.379455	0.403113	0.340946	0.338299	0.47429	0.36567	0.321849	0.414351	0.364472	0.325357	0.405736		0.264817	0.278058	0.220619	0.209359	0.224453	0.158083	0.269959	0.312754	0.330504
968.484	980.743	980.548	990.695	988.29	983.29	983.038	988.631	981.778	989.399	989.914	983.574	1009.47		12.2598	12.0641	22.2113	19.8064	14.8067	14.5546	20.1476	13.294	20.9158	21.4308	15.0906	40.989		0.853053		0.31161	0.333743	0.321983	0.297976	0.401479	0.368833	0.279434	0.339973	0.322951	0.332156	0.364901		0.184439	0.194154	0.198194	0.161177	0.117038	0.162281	0.224299	0.225474	0.286764
[truncated: 2 more columns]

## Sheet: MP-4pm2
background	syp-4(S269D)2-MP_n1	syp-4(S269D)2-MP_n2	syp-4(S269D)2-MP_n3	syp-4(S269D)2-MP_n4	syp-4(S269D)2-MP_n5	syp-4(S269D)2-MP_n6	syp-4(S269D)2-MP_n7	syp-4(S269D)2-MP_n8	syp-4(S269D)2-MP_n9	syp-4(S269D)2-MP_n10	syp-4(S269D)2-MP_n11	syp-4(S269D)2-MP_n12	unfrapped nuclei		syp-4(S269D)2-MP_n1	syp-4(S269D)2-MP_n2	syp-4(S269D)2-MP_n3	syp-4(S269D)2-MP_n4	syp-4(S269D)2-MP_n5	syp-4(S269D)2-MP_n6	syp-4(S269D)2-MP_n7	syp-4(S269D)2-MP_n8	syp-4(S269D)2-MP_n9	syp-4(S269D)2-MP_n10	syp-4(S269D)2-MP_n11	syp-4(S269D)2-MP_n12	unfrapped nuclei		ROI2		syp-4(S269D)2-MP_n1	syp-4(S269D)2-MP_n2	syp-4(S269D)2-MP_n3	syp-4(S269D)2-MP_n4	syp-4(S269D)2-MP_n5	syp-4(S269D)2-MP_n6	syp-4(S269D)2-MP_n7	syp-4(S269D)2-MP_n8	syp-4(S269D)2-MP_n9	syp-4(S269D)2-MP_n10	syp-4(S269D)2-MP_n11	syp-4(S269D)2-MP_n12		syp-4(S269D)2-MP_n1	syp-4(S269D)2-MP_n2	syp-4(S269D)2-MP_n3	syp-4(S269D)2-MP_n4	syp-4(S269D)2-MP_n5	syp-4(S269D)2-MP_n6
968.109	1008.81	1007.86	1045.51	1021.09	1025.9	1046.05	998.19	1042.37	1012.94	999.066	1025.54	1029.56	994.703		40.6968	39.7531	77.4042	52.9783	57.7943	77.9375	30.0806	74.2582	44.8336	30.9567	57.431	61.4485	26.5938		1.00584		1.10522	1.05665	1.00225	1.10552	1.01269	1.07852	1.08829	0.985556	1.07444	1.12904	0.993301	1.0522		1.13212	1.0825	1.00272	1.12868	1.01639	1.10387
967.866	1001.24	1003.8	1045.82	1011.29	1024.88	1035.3	993.389	1045.18	1006.97	992.067	1026.75	1023.9	994.77		33.3781	35.9298	77.9582	43.4248	57.0127	67.4338	25.5228	77.3148	39.1086	24.2007	58.8809	56.034	26.9044		0.994228		0.895997	0.944002	0.997773	0.8957	0.987459	0.92239	0.912731	1.01428	0.92642	0.872449	1.00662	0.948406		0.869409	0.918449	0.997313	0.872806	0.983803	0.897324
967.508	974.986	979.267	980.692	976.112	980.359	985.106	978.381	970.79	977.22	976.703	976.095	971.523	994.036		7.47802	11.7587	13.1833	8.60402	12.8503	17.5976	10.8727	3.28162	9.71182	9.19522	8.58682	4.01492	26.5274		1.00836		0.203592	0.313334	0.171129	0.179993	0.225731	0.244129	0.39435	0.0436628	0.233327	0.336204	0.148886	0.0689205		0	0	0	0	0	0
967.473	973.862	979.614	980.574	977.134	979.954	986.257	978.5	971.143	976.907	977.074	977.477	969.709	993.875		6.38948	12.1413	13.1015	9.66068	12.4807	18.7836	11.0268	3.66988	9.43418	9.60068	10.0038	2.23638	26.402		1.01315		0.174782	0.325064	0.170874	0.203057	0.220278	0.261819	0.401836	0.0490605	0.227733	0.352696	0.174278	0.0385722		-0.0361748	0.0170828	-0.000307461	0.0281272	-0.00704171	0.0234034
967.17	974.226	980.848	978.656	974.758	982.274	987.16	979.914	975.561	975.058	978.784	976.344	969.171	993.933		7.05515	13.6776	11.4859	7.58755	15.1036	19.9896	12.7437	8.39095	7.88795	11.6136	9.17365	2.00065	26.7627		0.999493		0.19039	0.361263	0.147784	0.157333	0.262979	0.274874	0.458148	0.110662	0.187842	0.420892	0.157662	0.0340414		-0.0165763	0.0698	-0.028165	-0.0276335	0.0481073	0.0406748
967.205	973.591	980.928	983.096	977.862	980.438	983.421	979.783	979.811	977.294	978.531	975.637	970.916	993.326		6.38615	13.7233	15.8917	10.6577	13.2337	16.216	12.5779	12.606	10.0892	11.326	8.43195	3.71175	26.1218		1.02401		0.176565	0.37136	0.209488	0.226418	0.236075	0.228456	0.463277	0.170329	0.246158	0.420539	0.14847	0.0647055		-0.0339363	0.0845043	0.0462785	0.0566152	0.0133606	-0.0207357
966.733	976.044	980.047	984.391	978.79	983.288	988.383	978.778	982.64	978.424	977.22	972.593	970.956	993.405		9.31064	13.3134	17.6579	12.0566	16.554	21.6491	12.0443	15.9064	11.6902	10.4867	5.85924	4.22274	26.6716		1.0029		0.252115	0.352844	0.227973	0.250856	0.289218	0.298711	0.434482	0.210495	0.27934	0.381353	0.101043	0.072096		0.0609273	0.057539	0.0685804	0.0864182	0.0819968	0.0722109
966.37	974.508	980.017	989.929	977.594	985.937	986.859	979.13	986.47	978.601	978.072	974.787	971.501	993.32		8.13776	13.647	23.5592	11.2235	19.5671	20.4883	12.7596	20.0997	12.2309	11.7016	8.41646	5.13046	26.95		0.992545		0.218079	0.357947	0.301019	0.231109	0.338328	0.279774	0.455528	0.263237	0.289239	0.421134	0.143643	0.0866889		0.018191	0.0649709	0.156708	0.0623359	0.145424	0.0471567
966.178	972.913	981.502	983.722	977.756	982.415	992.268	980.39	986.37	977.439	979.952	976.917	975.67	992.836		6.73403	15.3236	17.5434	11.5778	16.2367	26.0894	14.2119	20.1915	11.261	13.7738	10.7381	9.49183	26.6572		1.00345		0.182444	0.40634	0.226618	0.241025	0.283828	0.360173	0.512953	0.267346	0.26923	0.50116	0.185281	0.162145		-0.026554	0.135446	0.0669451	0.0744286	0.0750356	0.153523
966.126	972.004	981.873	984.266	980.213	985.46	992.551	980.729	988.904	979.582	980.168	976.226	975.838	993.035		5.87726	15.7463	18.1399	14.0865	19.334	26.4247	14.6029	22.7773	13.456	14.0422	10.1001	9.71176	26.9086		0.994074		0.157744	0.413646	0.232133	0.290509	0.334812	0.361393	0.522138	0.298764	0.318701	0.50615	0.172643	0.164351		-0.0575683	0.146086	0.0735989	0.134775	0.140883	0.155137
966.505	974.97	982.832	985.088	978.572	983.102	992.014	980.989	994.077	978.289	979.249	977.291	974.735	993.02		8.46483	16.3265	18.5829	12.0669	16.5964	25.5082	14.4833	27.5714	11.7838	12.7433	10.7852	8.22923	26.5149		1.00883		0.230566	0.435256	0.241333	0.252554	0.291672	0.354038	0.525552	0.367017	0.28324	0.466152	0.187091	0.14133		0.0338702	0.177557	0.0846984	0.0884886	0.0851662	0.145407
966.737	978.166	980.467	985.15	983.641	984.577	988.579	978.77	992.891	982.033	977.561	976.6	974.509	992.491		11.4291	13.7299	18.4131	16.9042	17.8393	21.8418	12.0326	26.1542	15.2955	10.8238	9.86306	7.77196	25.7534		1.03866		0.320512	0.376854	0.246198	0.364256	0.322785	0.312114	0.449533	0.358446	0.378518	0.407642	0.176154	0.137424		0.146809	0.0925051	0.0905678	0.22471	0.125349	0.0899424
966.315	978.86	979.776	982.886	981.798	987.16	994.481	978.601	992.07	981.017	978.238	976.812	974.448	992.379		12.5451	13.461	16.5703	15.4829	20.8444	28.1658	12.2853	25.7549	14.7019	11.9227	10.4968	8.13229	26.064		1.02628		0.347617	0.365071	0.218918	0.329655	0.372665	0.397687	0.453505	0.348767	0.359493	0.443679	0.185238	0.142082		0.180843	0.0753456	0.057656	0.182513	0.189772	0.203153
966.527	979.779	979.977	987.322	979.188	987.99	993.056	978.264	994.703	979.326	978.288	981.096	976.001	992.319		13.2517	13.4502	20.7953	12.6614	21.4631	26.5287	11.7366	28.1762	12.7993	11.7612	14.569	9.4743	25.7916		1.03713		0.371076	0.368632	0.277639	0.272429	0.38778	0.378529	0.437827	0.385587	0.316277	0.442293	0.259817	0.167277		0.210299	0.0805313	0.128501	0.112725	0.209294	0.177808
966.278	980.304	980.882	985.083	980.058	984.71	995.175	978.992	995.429	979.665	978.961	979.37	974.348	991.984		14.0266	14.604	18.805	13.7798	18.4326	28.8974	12.714	29.1515	13.3877	12.6831	13.0918	8.06997	25.7065		1.04056		0.394072	0.401577	0.251897	0.297472	0.334128	0.41369	0.475856	0.400253	0.33191	0.478538	0.234245	0.142953		0.239175	0.12851	0.0974429	0.143266	0.14	0.224325
966.283	979.153	981.238	984.622	983.697	986.271	996.652	979.381	999.495	983.063	979.457	981.831	979.291	991.785		12.8706	14.9553	18.3394	17.4145	19.9884	30.3693	13.0985	33.212	16.7801	13.1743	15.5486	13.0078	25.5024		1.04888		0.36449	0.41453	0.247627	0.378947	0.365231	0.438242	0.494173	0.459654	0.419346	0.501051	0.280431	0.232268		0.20203	0.147373	0.0922914	0.242625	0.180171	0.256807
966.133	980.783	980.679	983.646	981.89	987.881	999.346	978.198	996.261	982.024	977.858	978.724	975.506	991.822		14.6498	14.5463	17.5128	15.7573	21.748	33.2129	12.0652	30.1277	15.891	11.7253	12.5909	9.3727	25.6889		1.04127		0.411865	0.400266	0.234749	0.340396	0.394498	0.475797	0.451884	0.413941	0.394244	0.442705	0.225438	0.166144		0.261515	0.126601	0.0767549	0.195612	0.21797	0.306492
966.611	981.763	980.384	985.167	982.652	986.901	998.5	977.814	995.819	982.064	976.975	977.974	977.536	991.801		15.1519	13.7735	18.5565	16.0412	20.2899	31.8895	11.203	29.2081	15.4537	10.3643	11.3632	10.925	25.1904		1.06188		0.434411	0.386501	0.253661	0.353387	0.375332	0.465879	0.427895	0.409247	0.390982	0.399063	0.207482	0.197494		0.289825	0.106555	0.0995721	0.211454	0.193217	0.29337
966.284	982.883	979.996	990.506	981.558	987.283	998.365	977.592	997.069	982.867	978.024	979.731	977.831	992.067		16.5993	13.7117	24.2218	15.2742	20.999	32.0805	11.3079	30.7852	16.5831	11.7399	13.4472	11.5473	25.7829		1.03747		0.464971	0.375924	0.323495	0.328757	0.379522	0.457899	0.421976	0.421432	0.409914	0.441639	0.239891	0.203946		0.328198	0.0911517	0.183824	0.181418	0.198628	0.282813
966.201	980.971	980.21	992.461	981.23	986.649	997.819	977.641	994.551	983.034	978.778	979.852	977.951	991.865		14.7701	14.0093	26.2602	15.0293	20.4485	31.618	11.4408	28.3498	16.8335	12.5773	13.6512	11.7499	25.6647		1.04225		0.415638	0.385852	0.352334	0.324975	0.371275	0.453376	0.428901	0.38988	0.41802	0.47532	0.244652	0.208479		0.266253	0.10561	0.218617	0.176806	0.187977	0.276829
965.897	980.845	980.099	993.014	980.545	987.892	1000.42	978.08	993.984	981.141	979.263	981	978.029	991.633		14.9482	14.202	27.1172	14.6484	21.9955	34.5193	12.1831	28.0868	15.2443	13.3666	15.103	12.1318	25.7363		1.03935		0.419481	0.390073	0.362821	0.315859	0.398253	0.493602	0.45546	0.385189	0.377504	0.503746	0.269919	0.214658		0.271078	0.111756	0.231269	0.165689	0.22282	0.330047
966.124	982.643	979.617	989.762	978.765	991.303	1001.42	977.481	996.665	979.125	977.802	980.117	977.73	991.741		16.5191	13.493	23.638	12.6413	25.1788	35.2921	11.3578	30.5412	13.0012	11.6779	13.9934	11.6066	25.6172		1.04418		0.465717	0.372321	0.31774	0.273846	0.458008	0.506997	0.426579	0.420795	0.323452	0.442148	0.25125	0.206318		0.329134	0.0859033	0.17688	0.114455	0.299996	0.347768
966.262	981.508	978.929	988.904	980.738	990.459	1002.44	976.771	992.702	981.894	978.46	979.599	977.062	991.695		15.2458	12.6672	22.6416	14.4753	24.1967	36.1779	10.5091	26.4398	15.632	12.1981	13.3371	10.8	25.4326		1.05176		0.432939	0.352071	0.306555	0.315852	0.443339	0.523495	0.397568	0.366931	0.391725	0.465196	0.241204	0.193374		0.287977	0.0564135	0.163387	0.165681	0.28105	0.369595
966.288	982.642	978.87	991.087	980.581	988.338	1000.26	977.849	995.833	980.958	977.888	980.903	980.125	991.566		16.354	12.5819	24.799	14.2923	22.0497	33.9694	11.5609	29.5445	14.6698	11.5997	14.6141	13.837	25.2775		1.05822		0.46726	0.351848	0.337827	0.313774	0.406481	0.494556	0.440044	0.412535	0.369871	0.445091	0.265922	0.249273		0.331072	0.0560884	0.201114	0.163147	0.233447	0.331308
965.677	984.161	979.316	991.838	979.511	988.917	1001.6	977.414	994.683	979.463	977.355	983.455	979.007	991.528		18.4836	13.639	26.1603	13.8338	23.2399	35.9268	11.7365	29.0062	13.7855	11.6774	17.7781	13.3296	25.8502		1.03477		0.516405	0.372958	0.348475	0.296979	0.418929	0.511464	0.43683	0.396045	0.339873	0.438144	0.316327	0.234811		0.39278	0.0868313	0.213961	0.142665	0.249524	0.353678
966.407	984.074	980.181	991.438	982.114	988.594	1001.48	978.135	995.814	981.609	978.255	981.662	981.36	991.42		17.667	13.774	25.0307	15.7064	22.1868	35.0686	11.7278	29.4069	15.2021	11.8477	15.2546	14.9523	25.0128		1.06942		0.510118	0.389261	0.344592	0.348469	0.413338	0.515962	0.451122	0.41496	0.387349	0.459419	0.280515	0.272216		0.384886	0.110574	0.209277	0.205457	0.242302	0.359629
966.085	984.947	978.632	996.213	981.307	989.826	1001.02	976.369	996.933	982.398	976.799	984.819	981.65	991.301		18.8615	12.5471	30.1275	15.2216	23.7407	34.9394	10.2835	30.848	16.3125	10.7141	18.7338	15.565	25.2153		1.06083		0.540232	0.351739	0.411427	0.335	0.438733	0.509932	0.392387	0.431798	0.412302	0.412123	0.341725	0.281094		0.422698	0.05593	0.28991	0.189031	0.275101	0.351651
966.322	986.729	978.114	993.135	982.573	990.613	1000.39	975.854	1000.19	983.534	976.17	986.046	981.891	991.002		20.4074	11.7924	26.8131	16.2506	24.2913	34.0694	9.53234	33.867	17.2125	9.84794	19.7239	15.5687	24.6799		1.08384		0.597191	0.337755	0.374108	0.365405	0.458647	0.508021	0.371615	0.484341	0.444488	0.387023	0.367591	0.28726		0.494217	0.0355647	0.244886	0.226111	0.300821	0.349123
965.973	984.842	979.767	990.451	981.165	989.322	1000.54	977.135	997.202	981.715	976.691	983.67	983.263	991.341		18.8692	13.794	24.4778	15.1922	23.3485	34.5683	11.1618	31.2292	15.7423	10.7177	17.6974	17.2902	25.3677		1.05445		0.537204	0.38437	0.332264	0.332343	0.428892	0.501484	0.423341	0.434507	0.395499	0.409784	0.32088	0.310373		0.418897	0.103451	0.194403	0.185791	0.262391	0.340474
965.805	985.388	980.275	993.103	979.526	989.725	1000.74	978.436	998.385	978.976	979.502	981.901	981.477	991.244		19.583	14.4704	27.2985	13.7218	23.9201	34.9353	12.6309	32.58	13.1718	13.6977	16.0967	15.6726	25.4399		1.05146		0.555947	0.402076	0.369503	0.299327	0.438147	0.505371	0.477703	0.452016	0.329982	0.522239	0.29103	0.280539		0.44243	0.129236	0.23933	0.145528	0.274344	0.345617
965.914	985.443	979.506	996.525	980.429	992.83	1000.68	976.625	996.533	982.164	977.283	981.445	980.725	991.383		19.5289	13.5921	30.6115	14.5155	26.9163	34.7702	10.7115	30.6188	16.2505	11.3686	15.531	14.8111	25.4691		1.05026		0.553772	0.377236	0.41387	0.316275	0.492461	0.502404	0.404644	0.424318	0.406641	0.43294	0.280479	0.264812		0.4397	0.0930616	0.292857	0.166197	0.344493	0.341692
965.772	984.355	978.935	996.859	980.449	991.427	1001.95	975.985	997.038	980.962	976.784	982.026	984.701	991.365		18.5831	13.163	31.0871	14.6778	25.6555	36.1831	10.2136	31.2664	15.1904	11.0121	16.2545	18.9291	25.5933		1.04516		0.524397	0.363555	0.418261	0.318261	0.467117	0.520284	0.383964	0.431191	0.37827	0.417329	0.292121	0.336798		0.402815	0.0731377	0.298155	0.168618	0.31176	0.365347
965.326	986.005	979.648	997.698	981.716	988.14	1001.36	977.448	998.088	982.818	978.715	983.983	983.188	991.566		20.6784	14.3213	32.3723	16.3902	22.8141	36.0336	12.1219	32.7619	17.4917	13.3887	18.6572	17.8623	26.2398		1.01941		0.569148	0.385802	0.424822	0.346635	0.405149	0.505368	0.444477	0.440683	0.424846	0.494897	0.327041	0.309987		0.459006	0.105536	0.30607	0.203221	0.231726	0.345613
966.244	985.598	979.03	993.336	981.531	990.527	1001.9	977.124	1000.7	982.409	977.273	985.069	979.177	991.559		19.3537	12.7864	27.0924	15.287	24.2832	35.6586	10.8801	34.4587	16.1652	11.0294	18.8248	12.9326	25.3153		1.05664		0.552139	0.357031	0.368517	0.33511	0.446985	0.518372	0.413511	0.480433	0.406964	0.422575	0.342028	0.232631		0.437649	0.0636371	0.238141	0.189165	0.28576	0.362817
966.427	986.151	979.521	998.063	982.287	991.659	1001.02	976.57	998.988	981.383	977.43	983.961	982.108	991.396		19.7243	13.094	31.6367	15.8605	25.232	34.5926	10.143	32.5614	14.9561	11.0037	17.5342	15.6816	24.9692		1.07128		0.570512	0.370688	0.436294	0.352501	0.470888	0.509846	0.39084	0.460273	0.381744	0.427434	0.322995	0.28599		0.460719	0.083526	0.319911	0.210374	0.31663	0.351537
965.839	986.439	980.945	997.634	982.337	989.264	1001.66	978.832	997.397	983.67	980.137	981.54	983.872	991.241		20.6001	15.1057	31.7954	16.4984	23.4254	35.822	12.9931	31.5579	17.8313	14.2983	15.7011	18.033	25.402		1.05303		0.585691	0.420352	0.431011	0.36043	0.429723	0.518969	0.492132	0.438487	0.447376	0.545947	0.284299	0.32327		0.479778	0.155852	0.313538	0.220043	0.263465	0.363607
965.349	986.123	980.284	994.928	981.692	989.514	1001.19	977.465	998.043	981.817	977.809	983.571	980.535	991.01		20.7747	14.9354	29.5791	16.3437	24.1656	35.8453	12.116	32.6942	16.4687	12.46	18.222	15.186	25.6616		1.04238		0.584681	0.41141	0.396912	0.353439	0.438818	0.514054	0.45427	0.449681	0.409011	0.470945	0.326608	0.26948		0.47851	0.14283	0.272399	0.211518	0.275211	0.357105
965.977	986.736	979.426	995.415	981.234	993.027	1000.21	976.896	998.049	982.09	976.887	980.693	983.087	991.187		20.7592	13.4492	29.4386	15.257	27.0505	34.2353	10.9193	32.0717	16.1131	10.9102	14.7157	17.1102	25.2103		1.06104		0.594705	0.377104	0.402099	0.335846	0.499998	0.499755	0.416731	0.449016	0.407343	0.419751	0.268484	0.309061		0.491096	0.092869	0.278656	0.190063	0.354228	0.338187
965.997	986.985	979.839	996.612	981.898	989.277	1000.58	977.393	997.463	982.152	977.77	982.16	983.704	990.803		20.9886	13.8425	30.6154	15.9009	23.2801	34.5799	11.396	31.4669	16.1549	11.7731	16.1637	17.7078	24.8059		1.07834		0.611077	0.394457	0.424989	0.355725	0.437321	0.513013	0.442012	0.44773	0.415056	0.460331	0.299709	0.325068		0.511654	0.118141	0.306272	0.214305	0.273277	0.355728
965.824	985.733	980.623	995.229	982.976	991.176	1000.21	978.525	1000.22	982.672	978.325	984.431	982.765	991.117		19.9096	14.7996	29.4049	17.1525	25.3521	34.386	12.7011	34.3927	16.8485	12.5012	18.6076	16.9412	25.2931		1.05756		0.568498	0.413609	0.400323	0.376334	0.467071	0.500311	0.483145	0.479934	0.42454	0.479386	0.338379	0.305006		0.458189	0.146032	0.276514	0.239439	0.3117	0.338922
965.464	985.177	979.903	994.965	981.232	991.563	1000.13	977.778	996.929	981.162	978.02	985.074	985.897	990.945		19.7125	14.4389	29.5013	15.7684	26.0986	34.6613	12.3134	31.4648	15.6978	12.5564	19.6098	20.433	25.4806		1.04978		0.558727	0.400558	0.39868	0.34342	0.477285	0.500605	0.464949	0.435845	0.392633	0.477958	0.353979	0.365164		0.445921	0.127025	0.274531	0.199299	0.324892	0.339311
965.046	984.987	981.025	993.934	981.978	991.147	1002.97	978.339	997.735	984.131	979.055	982.409	983.718	991.09		19.9416	15.9796	28.8882	16.9318	26.1012	37.921	13.2933	32.6895	19.0857	14.0094	17.3636	18.672	26.0444		1.02706		0.552984	0.433702	0.381943	0.360774	0.466999	0.535828	0.491083	0.443007	0.467037	0.521722	0.306647	0.326468		0.43871	0.175294	0.254339	0.220463	0.311608	0.38591
965.251	986.364	979.949	992.065	983.333	989.129	1001.18	977.094	996.558	984.325	977.759	983.456	981.659	990.646		21.1124	14.6984	26.8137	18.0815	23.8774	35.9243	11.8427	31.3071	19.0735	12.508	18.2045	16.4076	25.3954		1.05331		0.600415	0.409126	0.363576	0.395119	0.43813	0.520588	0.448677	0.435117	0.478668	0.477715	0.329715	0.294209		0.498266	0.139503	0.23218	0.262347	0.274323	0.365749
965.54	985.573	979.776	994.391	984.642	990.507	1001.98	977.16	997.573	984.959	978.338	985.024	982.533	990.826		20.0329	14.2358	28.8508	19.1012	24.9663	36.4402	11.6194	32.0329	19.4187	12.7976	19.4832	16.9925	25.2855		1.05789		0.572192	0.397973	0.392899	0.419217	0.460103	0.53036	0.442132	0.44714	0.489451	0.490902	0.35441	0.306023		0.462829	0.123261	0.267557	0.291734	0.302701	0.378677
966.157	985.5	981.088	995.983	982.849	990.56	1000.07	978.343	999.517	982.275	979.833	982.26	983.488	990.614		19.343	14.9309	29.8256	16.6919	24.4024	33.9152	12.1852	33.3599	16.1176	13.6754	16.1025	17.3306	24.4564		1.09375		0.571216	0.431554	0.419943	0.378758	0.464956	0.510344	0.479379	0.481449	0.420017	0.542355	0.302842	0.322692		0.461602	0.172166	0.300185	0.242395	0.308969	0.352196
965.914	985.408	980.888	997.89	983.199	989.694	1002.36	977.674	998.389	983.206	979.33	983.993	981.719	990.85		19.4936	14.9743	31.9759	17.2854	23.7796	36.4436	11.7602	32.4752	17.292	13.4158	18.079	15.805	24.9358		1.07272		0.564597	0.424489	0.441564	0.384685	0.444379	0.537848	0.453765	0.459671	0.441959	0.521832	0.333478	0.288628		0.453291	0.161877	0.326269	0.249623	0.282393	0.388583
965.861	985.511	981.085	997.5	982.41	990.436	1000.22	978.41	996.513	983.198	979.037	982.987	983.972	990.319		19.6506	15.2239	31.6388	16.5492	24.5754	34.3629	12.5492	30.6523	17.3368	13.1766	17.1261	18.111	24.4579		1.09368		0.580261	0.439994	0.445444	0.375495	0.468221	0.517047	0.493665	0.442344	0.451759	0.522538	0.322072	0.3372		0.47296	0.184456	0.33095	0.238415	0.313186	0.361064
965.491	985.434	980.767	997.835	983.418	987.704	1000.6	977.805	997.605	983.198	979.245	982.606	982.996	990.548		19.9433	15.2763	32.3441	17.927	22.2133	35.1126	12.3142	32.1145	17.7069	13.7541	17.1148	17.505	25.0571		1.06752		0.574822	0.430951	0.444485	0.397031	0.413097	0.515694	0.472838	0.452363	0.45037	0.532397	0.314163	0.318124		0.466131	0.171288	0.329793	0.264678	0.241992	0.359274
965.505	985.849	982.272	997.705	980.159	989.458	1000.46	979.557	995.496	981.548	981.1	983.237	984.772	990.578		20.3442	16.7669	32.1998	14.6535	23.9533	34.9597	14.0518	29.9908	16.0433	15.595	17.732	19.2666	25.0732		1.06684		0.586002	0.472699	0.442219	0.324325	0.445171	0.51312	0.539213	0.422178	0.407796	0.60327	0.325285	0.349914		0.480169	0.232086	0.327059	0.176013	0.283416	0.355868
965.446	985.62	980.605	998.734	981.933	989.341	1001.74	977.825	997.987	982.269	979.152	982.683	982.379	990.447		20.1737	15.159	33.2878	16.4869	23.8951	36.2963	12.379	32.5405	16.8231	13.7055	17.2364	16.9325	25.001		1.06992		0.582768	0.428602	0.45848	0.365956	0.445371	0.534275	0.476393	0.459392	0.428852	0.531707	0.317105	0.30841		0.476108	0.167866	0.346678	0.226783	0.283674	0.383857
965.662	985.178	982.062	998.962	986.071	989.768	1001.55	980.158	997.356	985.88	980.197	983.066	981.538	990.348		19.5167	16.4005	33.3007	20.4089	24.1057	35.8866	14.4963	31.6946	20.2178	14.5357	17.4041	15.8762	24.6863		1.08356		0.570978	0.469616	0.464506	0.458788	0.455025	0.53498	0.564989	0.453155	0.52196	0.571105	0.324273	0.292858		0.461303	0.227596	0.353948	0.339992	0.296143	0.384789
965.619	985.363	982.061	998.653	985.153	989.098	998.723	979.368	995.807	984.996	980.236	982.161	981.724	990.265		19.7441	16.4423	33.034	19.5337	23.4794	33.1041	13.7491	30.1877	19.3768	14.6172	16.5417	16.1055	24.6458		1.08534		0.578579	0.471586	0.461542	0.439835	0.44393	0.49431	0.536747	0.432319	0.50107	0.57525	0.308711	0.297576		0.470848	0.230465	0.350372	0.316878	0.281814	0.330983
965.496	985.019	982.807	999.26	982.91	989.285	997.087	979.5	994.427	983.055	981.058	984.532	983.157	990.07		19.5227	17.3113	33.7638	17.4145	23.7893	31.5907	14.0046	28.9314	17.5588	15.5622	19.0363	17.6608	24.5741		1.08851		0.573762	0.497961	0.473116	0.393263	0.451101	0.473089	0.548318	0.415537	0.455381	0.614229	0.356305	0.327264		0.4648	0.268874	0.364336	0.260083	0.291075	0.302909
965.208	985.3	980.964	999.424	984.764	989.484	993.791	977.654	997.025	984.376	978.396	983.872	984	990.246		20.0923	15.756	34.216	19.5567	24.2767	28.5837	12.446	31.8171	19.1683	13.1884	18.6644	18.7928	25.0388		1.06831		0.579543	0.444811	0.470555	0.433443	0.451802	0.420114	0.478251	0.448503	0.487899	0.510876	0.34286	0.341779		0.472058	0.191472	0.361245	0.309082	0.29198	0.232823
965.574	983.776	982.751	998.357	984.775	989.356	996.028	979.879	996.822	984.411	980.203	984.331	984.224	989.657		18.2018	17.1767	32.7828	19.2011	23.7825	30.4535	14.3053	31.2484	18.8369	14.6294	18.7567	18.65	24.0831		1.1107		0.545846	0.50416	0.468735	0.442448	0.460168	0.465356	0.571508	0.457966	0.498489	0.589182	0.358228	0.352641		0.429747	0.277903	0.35905	0.320064	0.302785	0.292678
965.504	984.04	982.338	999.658	983.606	990.972	1002.9	979.531	995.957	983.622	981.628	983.897	982.268	990.136		18.5363	16.8338	34.154	18.1019	25.4684	37.3913	14.027	30.4525	18.1177	16.1235	18.3932	16.7639	24.6317		1.08596		0.543497	0.483092	0.477464	0.407829	0.481813	0.558646	0.547909	0.436361	0.468779	0.634893	0.343462	0.309918		0.426798	0.247221	0.369581	0.277847	0.33074	0.416099
965.397	984.619	983.247	997.789	983.594	990.234	993.665	980.298	995.286	984.128	981.975	985.534	981.683	989.971		19.2214	17.8494	32.392	18.1965	24.8368	28.2679	14.9003	29.8885	18.731	16.5778	20.1364	16.2856	24.574		1.08851		0.564908	0.51344	0.453895	0.410923	0.470968	0.42333	0.583388	0.429285	0.485785	0.654315	0.376896	0.301783		0.453682	0.291417	0.341146	0.28162	0.316733	0.237078
965.618	985.102	984.193	996.542	983.656	990.248	998.993	980.906	997.713	983.811	982.256	984.658	983.546	990.021		19.4846	18.5751	30.9247	18.0384	24.6306	33.3752	15.2888	32.0954	18.1931	16.6381	19.0408	17.9282	24.403		1.09614		0.576655	0.538058	0.43637	0.410207	0.47033	0.503316	0.602792	0.464212	0.47514	0.661296	0.358886	0.334549		0.468432	0.327269	0.320003	0.280746	0.315909	0.342898
965.459	983.87	984.099	996.29	982.212	991.668	995.126	980.355	996.699	982.15	981.401	985.698	981.282	990.21		18.4115	18.6406	30.8319	16.753	26.2094	29.6677	14.8959	31.2406	16.6913	15.942	20.2396	15.8234	24.751		1.08073		0.537237	0.532366	0.428945	0.375621	0.493443	0.441116	0.579047	0.445497	0.429792	0.624723	0.376119	0.291122		0.418938	0.318979	0.311045	0.238569	0.345761	0.260609
965.435	983.46	984.047	996.393	983.521	989.763	988.105	980.531	996.962	983.379	980.846	983.026	984.555	989.921		18.0255	18.6128	30.9584	18.0867	24.328	22.67	15.0963	31.527	17.9444	15.4112	17.5915	19.12	24.4868		1.09239		0.531649	0.537307	0.435353	0.409899	0.462963	0.340707	0.593169	0.454432	0.467044	0.610438	0.330436	0.355569		0.411921	0.326175	0.318775	0.280371	0.306396	0.127771
965.28	984.516	984.967	996.897	982.548	989.472	995.467	981.999	994.55	982.565	982.785	987.581	983.739	989.978		19.2357	19.687	31.6174	17.2676	24.1919	30.187	16.7195	29.2705	17.2847	17.5048	22.3013	18.4592	24.6976		1.08306		0.562498	0.563463	0.440823	0.387994	0.456442	0.449806	0.651337	0.418304	0.446031	0.687444	0.415327	0.340348		0.450656	0.364267	0.325375	0.253658	0.297973	0.272106
965.224	984.38	983.323	996.009	981.849	990.985	991.883	979.843	996.833	982.101	980.755	986.498	986.189	990.08		19.1551	18.0989	30.785	16.6246	25.7602	26.6585	14.6187	31.6088	16.8768	15.5307	21.2732	20.9644	24.8554		1.07619		0.556587	0.514723	0.426493	0.371176	0.482948	0.394708	0.565883	0.448854	0.432742	0.606048	0.393666	0.384086		0.443233	0.293286	0.308087	0.233148	0.332206	0.199212
965.319	984.512	984.816	998.51	983.254	991.163	994.595	981.237	997.143	984.76	982.369	985.28	985.251	989.793		19.1928	19.4967	33.1907	17.9347	25.8446	29.2758	15.9185	31.8243	19.4411	17.0497	19.9611	19.9321	24.4737		1.09297		0.566376	0.56312	0.466993	0.406669	0.492084	0.44022	0.625808	0.45896	0.506268	0.675695	0.375144	0.370868		0.455526	0.363767	0.356948	0.276432	0.344007	0.259423
965.195	983.807	984.029	997.653	982.661	989.445	1000.88	980.58	995.567	984.038	981.087	986.691	984.733	989.49		18.6123	18.8336	32.4574	17.4662	24.2495	35.6869	15.3851	30.3722	18.8426	15.8922	21.4955	19.5381	24.2953		1.101		0.553283	0.547966	0.460029	0.398956	0.465106	0.540565	0.60928	0.441237	0.494286	0.634452	0.40695	0.366207		0.439085	0.341698	0.348547	0.267027	0.309163	0.392178
965.591	984.511	984.186	997.56	983	991.317	998.209	981.332	996.168	983.165	982.018	986.55	986.332	989.899		18.9199	18.595	31.9693	17.4094	25.7263	32.6179	15.7404	30.5766	17.5736	16.4266	20.959	20.7413	24.3081		1.10042		0.56213	0.540739	0.452872	0.39745	0.493171	0.493817	0.623023	0.443973	0.460755	0.65544	0.396584	0.388554		0.450194	0.331173	0.339912	0.265189	0.345411	0.330331
965.365	983.867	983.492	997.224	983.489	988.023	995.151	979.702	996.738	985.097	979.794	985.953	984.588	989.678		18.5022	18.1267	31.8592	18.1244	22.6576	29.7861	14.3369	31.3731	19.732	14.429	20.5881	19.2227	24.3135		1.10018		0.549596	0.527002	0.451212	0.41368	0.434247	0.450845	0.567343	0.455436	0.517228	0.575604	0.389479	0.360025		0.434456	0.311168	0.337909	0.284982	0.269308	0.27348
965.781	982.295	984.01	996.5	982.943	991.191	997.165	980.454	994.845	984.694	981.651	988.338	985.785	989.572		16.514	18.2292	30.7189	17.1623	25.4099	31.3843	14.673	29.0638	18.9128	15.8699	22.5571	20.0046	23.7913		1.12432		0.501304	0.541614	0.444611	0.400317	0.497685	0.48546	0.593386	0.431172	0.506635	0.646979	0.436093	0.382892		0.373818	0.332447	0.329945	0.268686	0.35124	0.319276
965.188	981.335	985.771	996.976	984.453	991.716	999.09	982.432	995.907	984.827	983.767	987.186	983.987	989.4		16.1467	20.5829	31.7876	19.2654	26.5284	33.9017	17.2439	30.7188	19.6389	18.579	21.9982	18.7988	24.2117		1.1048		0.481643	0.600927	0.45209	0.44157	0.51057	0.515296	0.685246	0.447813	0.516951	0.744271	0.417903	0.353565		0.349131	0.418825	0.338968	0.318994	0.367882	0.358748
965.167	982.137	984.826	997.033	983.95	989.307	994.384	981.778	994.319	986.067	981.885	985.554	984.341	989.789		16.97	19.6588	31.8667	18.7831	24.1398	29.2169	16.6108	29.1525	20.9006	16.7187	20.3873	19.1748	24.6222		1.08638		0.497763	0.564379	0.44566	0.423339	0.456854	0.436686	0.649084	0.417894	0.540991	0.658583	0.380846	0.354625		0.369372	0.3656	0.33121	0.296761	0.298505	0.254748
965.006	982.369	985.229	997.611	984.76	990.043	996.722	981.804	993.237	984.984	982.86	986.006	987.718	988.96		17.3636	20.2229	32.6058	19.7539	25.0369	31.7161	16.7986	28.2314	19.9781	17.8539	21.0005	22.7127	23.954		1.11668		0.523516	0.59677	0.468716	0.457639	0.48705	0.487261	0.674735	0.415979	0.531539	0.72292	0.403243	0.431774		0.401709	0.412771	0.359027	0.33859	0.337504	0.321658
965.311	981.523	985.388	997.077	985.926	991.165	992.709	982.494	995.286	984.777	983.429	988.753	986.729	989.234		16.2123	20.0769	31.7661	20.6154	25.8544	27.398	17.183	29.9751	19.4657	18.118	23.4421	21.4179	23.9233		1.11812		0.489433	0.593223	0.457232	0.478212	0.503599	0.421463	0.691062	0.44224	0.518572	0.734558	0.450704	0.407683		0.358913	0.407607	0.345172	0.363678	0.358879	0.234608
964.891	981.706	985.234	996.456	985.187	990.125	990.356	981.756	993.65	986.612	981.741	989.803	985.558	989.298		16.8148	20.3422	31.565	20.2955	25.2333	25.4646	16.8645	28.7587	21.7202	16.8499	24.9113	20.6664	24.4063		1.09599		0.497576	0.589167	0.445346	0.461474	0.481774	0.383969	0.66483	0.415897	0.567181	0.669625	0.469473	0.385594		0.369137	0.401699	0.330832	0.343266	0.330691	0.185005
965.129	981.898	985.603	997.127	984.315	993.707	994.826	982.68	994.826	985.876	983.998	988.726	985.391	989.046		16.7694	20.4741	31.9981	19.1863	28.5786	29.6969	17.551	29.6977	20.7471	18.8693	23.5977	20.262	23.9171		1.11841		0.506382	0.605116	0.460691	0.445176	0.556807	0.456945	0.706045	0.438261	0.552852	0.765216	0.453813	0.385781		0.380195	0.424926	0.349345	0.323392	0.427598	0.281551
965.042	981.59	985.028	998.421	981.998	990.512	995.643	981.939	992.408	982.492	982.535	987.544	984.438	989.252		16.5482	19.9867	33.3798	16.9564	25.4702	30.6013	16.8977	27.3664	17.4508	17.4936	22.5023	19.396	24.2106		1.10485		0.493643	0.583549	0.474757	0.388666	0.490228	0.465152	0.671522	0.39896	0.459376	0.700824	0.4275	0.364815		0.3642	0.393517	0.366316	0.254477	0.341609	0.292408
965.271	982.466	985.535	996.499	984.181	992.188	996.877	982.558	992.754	985.489	982.871	986.654	985.776	988.877		17.1948	20.2642	31.2276	18.9096	26.9169	31.606	17.2868	27.4822	20.2172	17.5996	21.3828	20.5046	23.606		1.13315		0.526069	0.606804	0.455522	0.444537	0.531341	0.492728	0.704579	0.41091	0.54583	0.723129	0.416636	0.395544		0.404914	0.427384	0.343109	0.322612	0.394708	0.328891
964.944	981.091	985.915	996.402	982.171	989.703	992.208	982.691	993.226	983.634	983.893	987.219	984.604	988.832		16.1464	20.9709	31.4578	17.2272	24.7588	27.2635	17.7471	28.2823	18.6897	18.9491	22.2752	19.6597	23.8878		1.11978		0.488168	0.62056	0.453468	0.40021	0.482976	0.420017	0.71481	0.417885	0.498639	0.769395	0.428906	0.374773		0.357324	0.447417	0.340631	0.268555	0.332243	0.232696
964.678	981.169	985.548	995.028	981.652	988.993	990.432	982.341	992.728	982.271	982.709	987.245	983.683	988.842		16.4911	20.8699	30.3492	16.9736	24.3147	25.7533	17.6631	28.0495	17.5932	18.0306	22.5671	19.0051	24.1634		1.10701		0.492902	0.610527	0.432497	0.389821	0.468902	0.392226	0.703311	0.409718	0.464031	0.72375	0.42957	0.358162		0.363269	0.432805	0.31533	0.255886	0.314066	0.195928
964.975	980.931	984.324	994.978	980.092	989.611	990.507	981.101	990.445	981.775	981.144	987.77	985.254	988.76		15.9564	19.3487	30.003	15.1168	24.6363	25.5316	16.1263	25.4699	16.7996	16.1685	22.7947	20.2787	23.7855		1.1246		0.484497	0.575018	0.434356	0.352692	0.482652	0.395027	0.65232	0.377948	0.450138	0.659316	0.440795	0.388234		0.352715	0.381094	0.317573	0.210608	0.331825	0.199634
965.638	981.672	984.745	994.56	983.524	991.099	997.39	981.746	993.88	982.944	982.141	986.264	987.014	989.265		16.034	19.1073	28.9223	17.8866	25.4616	31.7525	16.1086	28.2423	17.3067	16.5038	20.6269	21.3766	23.6276		1.13211		0.490108	0.57164	0.42151	0.420105	0.502155	0.494561	0.65596	0.42189	0.466826	0.677488	0.401542	0.41199		0.359761	0.376174	0.302075	0.292817	0.357014	0.331316
965.322	981.678	984.677	993.564	981.372	990.355	995.045	981.821	993.62	983.213	983.26	988.141	986.844	989.166		16.3559	19.3553	28.242	16.0505	25.0332	29.7231	16.499	28.2977	17.8914	17.9378	22.8197	21.522	23.8447		1.12181		0.495396	0.573787	0.407848	0.373548	0.489211	0.458737	0.665741	0.418869	0.478204	0.729649	0.440184	0.411015		0.3664	0.379302	0.285592	0.236041	0.340296	0.283921
964.984	981.585	984.32	995.836	983.794	989.543	990.04	981.603	991.45	984.639	982.966	989.629	986.558	988.825		16.6007	19.3359	30.8524	18.8101	24.5592	25.0565	16.6195	26.4661	19.6554	17.9821	24.6454	21.5741	23.8409		1.12198		0.502887	0.5733	0.445614	0.43784	0.480022	0.386774	0.670706	0.391817	0.525433	0.731563	0.475474	0.412074		0.375807	0.378592	0.331155	0.314445	0.328428	0.188716
965.261	982.154	984.168	996.286	982.215	990.455	993.217	980.677	990.896	984.061	981.422	990.177	987.212	988.889		16.8925	18.907	31.0241	16.9532	25.1937	27.9553	15.4151	25.6346	18.7992	16.1602	24.9151	21.9502	23.6271		1.13214		0.516361	0.565659	0.452151	0.39819	0.496882	0.435427	0.627733	0.382943	0.507095	0.663397	0.48503	0.423053		0.392724	0.367465	0.339041	0.266092	0.350203	0.253082
[truncated: 6 more columns]

## Sheet: MP-4pd1
background	syp-4(S269A)1-MP_n1	syp-4(S269A)1-MP_n2	syp-4(S269A)1-MP_n3	syp-4(S269A)1-MP_n4	syp-4(S269A)1-MP_n5	syp-4(S269A)1-MP_n6	syp-4(S269A)1-MP_n7	syp-4(S269A)1-MP_n8	syp-4(S269A)1-MP_n9	syp-4(S269A)1-MP_n10	syp-4(S269A)1-MP_n11	unfrapped nuclei		syp-4(S269A)1-MP_n1	syp-4(S269A)1-MP_n2	syp-4(S269A)1-MP_n3	syp-4(S269A)1-MP_n4	syp-4(S269A)1-MP_n5	syp-4(S269A)1-MP_n6	syp-4(S269A)1-MP_n7	syp-4(S269A)1-MP_n8	syp-4(S269A)1-MP_n9	syp-4(S269A)1-MP_n10	syp-4(S269A)1-MP_n11	unfrapped nuclei		ROI2		syp-4(S269A)1-MP_n1	syp-4(S269A)1-MP_n2	syp-4(S269A)1-MP_n3	syp-4(S269A)1-MP_n4	syp-4(S269A)1-MP_n5	syp-4(S269A)1-MP_n6	syp-4(S269A)1-MP_n7	syp-4(S269A)1-MP_n8	syp-4(S269A)1-MP_n9	syp-4(S269A)1-MP_n10	syp-4(S269A)1-MP_n11		syp-4(S269A)1-MP_n1	syp-4(S269A)1-MP_n2	syp-4(S269A)1-MP_n3	syp-4(S269A)1-MP_n4	syp-4(S269A)1-MP_n5	syp-4(S269A)1-MP_n6	syp-4(S269A)1-MP_n7	syp-4(S269A)1-MP_n8	syp-4(S269A)1-MP_n9
970.527	1024.95	1021.56	1011.65	1024.08	1013.75	1010.14	1011.18	1021.2	1029.92	1011.93	1004.8	1002.02		54.4267	51.0282	41.1246	53.5507	43.2258	39.6155	40.6545	50.6691	59.3906	41.4013	34.2727	31.4959		0.983129		0.98591	1.01407	0.958033	0.990929	1.0071	0.968285	0.993395	0.981501	1.00259	1.00888	0.923625		0.982793	1.01926	0.942879	0.988355	1.01115	0.938834	0.990444	0.980673	1.00403
971.304	1025.42	1019.22	1014.58	1024.01	1012.47	1012.13	1011.12	1022.14	1028.39	1010.59	1009.99	1001.74		54.1197	47.9143	43.2792	52.7077	41.1681	40.8302	39.8143	50.8372	57.0853	39.2877	38.6887	30.4332		1.01746		1.01458	0.985438	1.04343	1.00939	0.992652	1.03282	1.00684	1.01914	0.997322	0.990808	1.07904		1.01781	0.98007	1.05912	1.01205	0.988464	1.0633	1.00989	1.02	0.995828
971.203	980.362	983.617	981.634	982.143	985.476	989.246	982.778	973.228	990.636	984.91	976.345	1000.05		9.1593	12.4148	10.4308	10.9405	14.2728	18.0432	11.5748	2.0251	19.4335	13.7071	5.1418	28.8486		1.07335		0.181141	0.269356	0.265293	0.221026	0.363051	0.481482	0.308784	0.0428275	0.358166	0.364671	0.151283		0	0	0	0	0	0	0	0	0
970.604	983.184	985.92	984.514	986.335	986.633	989.454	987.298	975.698	987.109	984.843	978.052	1000.03		12.5802	15.3158	13.9101	15.7313	16.0288	18.8502	16.6939	5.09438	16.5051	14.2395	7.44808	29.4239		1.05236		0.24393	0.325799	0.346866	0.311598	0.399745	0.493181	0.43664	0.105631	0.298246	0.371427	0.214855		0.0766788	0.0772515	0.111028	0.116271	0.0576091	0.0225621	0.184972	0.0656137	-0.0933569
970.633	987.911	987.676	983.048	985.511	986.467	985.481	981.933	974.271	991.473	985.574	976.896	999.081		17.2784	17.0437	12.4152	14.878	15.8349	14.8484	11.3009	3.63877	20.8401	14.9416	6.26347	28.4481		1.08846		0.346521	0.374992	0.320208	0.304805	0.408456	0.401807	0.305722	0.0780375	0.389498	0.40311	0.18688		0.201964	0.14458	0.0747451	0.107551	0.0712854	-0.153659	-0.00443088	0.0367855	0.0488161
970.064	992.985	988.627	984.724	988.661	989.879	989.266	984.344	979.728	994.666	990.156	976.162	998.364		22.9213	18.5633	14.6602	18.5969	19.8153	19.2028	14.2805	9.66444	24.6023	20.0921	6.09864	28.2999		1.09416		0.462099	0.410566	0.380092	0.382991	0.513808	0.522363	0.388354	0.20835	0.462222	0.544907	0.182915		0.343109	0.193269	0.156253	0.207921	0.236686	0.0788427	0.115115	0.172929	0.162123
970.799	991.273	989.988	986.959	989.02	991.678	993.104	983.829	985.231	989.585	991.15	972.312	998.542		20.474	19.1887	16.1604	18.2211	20.8794	22.3054	13.0301	14.4318	18.7864	20.3507	1.51249	27.7434		1.11611		0.421039	0.432911	0.427391	0.382778	0.552259	0.618932	0.361456	0.317368	0.360034	0.56299	0.0462738		0.292967	0.22385	0.22063	0.207647	0.297053	0.265082	0.0762016	0.286824	0.00290969
970.374	990.513	989.229	984.43	990.703	994.106	996.677	984.075	984.213	996.642	994.005	975.13	999.349		20.139	18.8554	14.056	20.3289	23.732	26.3034	13.7009	13.8394	26.2682	23.6313	4.75604	28.9747		1.06868		0.396551	0.407315	0.35594	0.40891	0.601036	0.698853	0.363914	0.291408	0.482027	0.625965	0.139325		0.263062	0.188818	0.123379	0.241194	0.373632	0.419216	0.0797577	0.259703	0.192979
969.81	993.786	994.45	987.204	995.064	992.9	999.331	987.368	987.15	996.077	995.346	977.1	999.741		23.9757	24.6394	17.394	25.2542	23.0893	29.5204	17.5578	17.3402	26.2666	25.5353	7.2894	29.9308		1.03454		0.457017	0.515257	0.426397	0.491753	0.566078	0.759269	0.45146	0.353458	0.466599	0.654792	0.206716		0.336903	0.336554	0.219277	0.347543	0.318749	0.535733	0.206412	0.324529	0.168943
970.352	994.624	994.011	987.311	995.716	1005.28	993.469	991.867	986.058	999.646	992.123	977.138	999.549		24.2722	23.6596	16.9596	25.3637	34.9238	23.117	21.5156	15.7062	29.294	21.7712	6.78599	29.1976		1.06052		0.474287	0.507192	0.426188	0.506287	0.877725	0.609504	0.567118	0.32819	0.533446	0.572289	0.197273		0.357994	0.325516	0.218993	0.366201	0.808029	0.246899	0.373738	0.298131	0.273092
970.709	994.3	994.574	989.563	993.768	1003.84	995.069	993.217	986.79	1000.93	995.672	977.239	999.715		23.5908	23.8651	18.8543	23.0583	33.1272	24.3599	22.5076	16.0807	30.2237	24.9628	6.53017	29.0053		1.06755		0.464028	0.514988	0.476941	0.463319	0.838089	0.646531	0.597198	0.338243	0.554024	0.660535	0.191095		0.345465	0.336186	0.288072	0.311042	0.745803	0.318309	0.417255	0.308633	0.305153
969.882	996.036	996.498	987.707	997.268	1001.88	998.371	991.407	987.017	1003.97	995.678	976.833	1000.54		26.1539	26.616	17.8252	27.3855	31.9934	28.4886	21.5249	17.1353	34.0883	25.7961	6.95112	30.6616		1.00988		0.486656	0.543326	0.426553	0.520545	0.765685	0.715268	0.540274	0.340957	0.591112	0.645714	0.192425		0.373098	0.374971	0.21949	0.384504	0.632129	0.450874	0.334903	0.311469	0.362938
969.72	999.206	997.222	990.616	996.596	1002.12	998.491	995.276	987.444	1005.79	994.496	978.364	1001.2		29.4863	27.5023	20.8968	26.8766	32.4029	28.7716	25.5567	17.7242	36.0695	24.7766	8.64437	31.4788		0.983665		0.534418	0.546843	0.487073	0.497608	0.755352	0.703619	0.624818	0.343518	0.609229	0.604093	0.233087		0.431427	0.379784	0.301862	0.35506	0.615907	0.428408	0.457215	0.314145	0.391165
970.19	1001.29	997.929	994.908	999.112	1001.8	999.137	995.494	989.706	1009.63	1002.5	983.425	1001.22		31.1003	27.7398	24.7184	28.9223	31.6079	28.9473	25.3045	19.5167	39.4434	32.3122	13.235	31.0325		0.997811		0.571777	0.559497	0.584435	0.543184	0.747416	0.718097	0.627549	0.383699	0.675797	0.799153	0.361999		0.47705	0.397104	0.43438	0.413568	0.603447	0.456329	0.461166	0.356123	0.49488
969.25	1000.58	998.207	995.286	1001.78	1002.57	998.081	1003.92	992.447	1011.5	999.862	981.222	1001.2		31.3279	28.9574	26.0364	32.5276	33.3205	28.8315	34.6729	23.1971	42.2514	30.6122	11.9724	31.9487		0.969195		0.559444	0.567306	0.597943	0.593375	0.765317	0.694712	0.835225	0.442977	0.703146	0.735395	0.318074		0.461988	0.407791	0.452765	0.478	0.631551	0.41123	0.761615	0.418054	0.537492
970.005	1000.02	999.482	997.662	1001.98	999.589	1001.04	1002.76	992.349	1010.33	999.621	985.169	1000.18		30.0178	29.4771	27.6573	31.9773	29.584	31.0309	32.7513	22.344	40.3285	29.6168	15.1647	30.1708		1.02631		0.567637	0.611518	0.672597	0.617712	0.719537	0.791769	0.835426	0.45183	0.710695	0.753409	0.426627		0.471993	0.468302	0.554377	0.509241	0.559677	0.598412	0.761907	0.427303	0.549252
969.422	1000.61	1000.45	1001.24	1002.97	1001.32	1002.61	1002.18	994.427	1011.39	995.984	980.206	1001.14		31.1881	31.0267	31.8191	33.5482	31.8957	33.1855	32.7595	25.0052	41.9723	26.5618	10.7837	31.7221		0.976119		0.560927	0.612189	0.735967	0.616366	0.737826	0.805338	0.794772	0.480917	0.703492	0.642652	0.288541		0.463799	0.46922	0.640629	0.507514	0.58839	0.62458	0.703091	0.457691	0.538031
969.67	1000.08	1003.44	1000.6	1004.68	999.786	1002.82	1001.24	995.532	1010.56	999.178	980.136	1001.19		30.4135	33.7689	30.9263	35.0094	30.116	33.1447	31.5733	25.8619	40.8896	29.5082	10.4655	31.5149		0.982535		0.550591	0.670675	0.720019	0.64744	0.701236	0.809635	0.771029	0.500663	0.68985	0.718632	0.281868		0.451177	0.549268	0.618922	0.547405	0.530946	0.632867	0.668741	0.478321	0.516776
970.04	1000.92	1004.52	1000.87	1008.67	999.447	999.089	1003.69	993.988	1012.86	998.334	981.729	1001.34		30.8818	34.4755	30.8274	38.6254	29.4068	29.049	33.6523	23.9477	42.8242	28.2936	11.6888	31.3014		0.989238		0.562883	0.68938	0.722613	0.719185	0.689394	0.714429	0.827405	0.466768	0.727418	0.693753	0.316962		0.466187	0.574868	0.622452	0.639506	0.512353	0.449255	0.750302	0.44291	0.575307
969.572	1002.43	1000.7	1001.28	1005.82	999.775	1001.16	1003.03	996.63	1011.84	998.986	982.045	1001.7		32.8613	31.1246	31.7059	36.2512	30.2029	31.5919	33.4597	27.0579	42.2713	29.4142	12.4737	32.1332		0.963632		0.58346	0.606265	0.723969	0.657507	0.68973	0.756858	0.801376	0.513739	0.699441	0.702562	0.329492		0.491316	0.461113	0.624297	0.560329	0.512881	0.531083	0.712645	0.491982	0.531718
968.741	1002.28	999.192	1002.7	1003.55	1000.14	1003.89	1002.58	996.739	1012.12	1000.77	985.345	1001.87		33.5348	30.4511	33.9574	34.8076	31.4042	35.1517	33.8346	27.9985	43.3766	32.0248	16.604	33.1278		0.934699		0.577541	0.575337	0.752098	0.612369	0.695631	0.816856	0.786024	0.515637	0.69618	0.741949	0.425424		0.484088	0.418783	0.662584	0.502382	0.522145	0.646794	0.690435	0.493965	0.526638
968.738	1001.62	1000.58	1001.26	1002.54	1000.93	999.652	1002.2	996.849	1012.76	999.633	983.201	1001.06		32.8808	31.8417	32.5173	33.7992	32.1889	30.9137	33.4588	28.1112	44.017	30.895	14.4627	32.3207		0.958041		0.580418	0.616634	0.738187	0.609477	0.730818	0.736312	0.796703	0.53064	0.7241	0.733648	0.379813		0.487602	0.475304	0.64365	0.49867	0.577388	0.491459	0.705886	0.509639	0.570137
969.427	1001.3	1003.31	1001.12	1008.56	1002.24	999.04	1004.1	998.302	1013.55	1000.86	982.743	1001.51		31.8767	33.8827	31.6965	39.1317	32.8081	29.6128	34.6715	28.8744	44.1232	31.437	13.3154	32.0815		0.965182		0.566888	0.66105	0.724917	0.710893	0.750428	0.710584	0.831733	0.549109	0.731257	0.752083	0.352289		0.471078	0.536094	0.625588	0.628862	0.608176	0.441841	0.756564	0.528935	0.581289
968.927	1001.07	1002.42	1000.78	1009.26	1004.88	1001.15	1006.48	998.924	1012.63	999.923	983.987	1001.18		32.1389	33.4934	31.8505	40.3318	35.9563	32.2244	37.5551	29.9975	43.7001	30.9962	15.0603	32.2532		0.960046		0.568509	0.649977	0.724563	0.728797	0.818061	0.769137	0.896114	0.567432	0.720391	0.737592	0.396335		0.473059	0.52094	0.625107	0.651845	0.714359	0.554765	0.849706	0.548078	0.564359
968.718	1000.36	1004.1	1001.14	1007.58	1004.73	1001.89	1006.54	999.417	1015.85	1001.88	986.708	1001.28		31.6424	35.3778	32.4178	38.8626	36.0134	33.1675	37.8209	30.699	47.1319	33.1656	17.9904	32.5634		0.950902		0.554396	0.680008	0.730445	0.69556	0.811557	0.784108	0.893861	0.575171	0.769564	0.781699	0.468936		0.455823	0.562041	0.633112	0.609178	0.704147	0.583636	0.846446	0.556163	0.640972
969.674	1000.08	1001.67	1003.41	1004.27	1000.78	999.622	1005.57	1003.95	1014.08	1000.61	986.493	1000.55		30.4104	31.9996	33.7392	34.5923	31.1104	29.9482	35.8964	34.2812	44.4066	30.9388	16.8192	30.8715		1.00302		0.56201	0.648782	0.801881	0.653061	0.739489	0.746802	0.894872	0.677486	0.764802	0.769177	0.462434		0.465122	0.519304	0.730343	0.55462	0.591002	0.511688	0.847908	0.663056	0.633553
968.64	1003.65	1001.5	1000.31	1004.8	1001.09	998.555	1003.33	1000.92	1015.83	1001.77	990.239	1001.61		35.008	32.8582	31.6667	36.1582	32.4474	29.9155	34.6895	32.2772	47.1866	33.1316	21.5989	32.9692		0.939197		0.605813	0.623803	0.704738	0.63919	0.722197	0.698522	0.809762	0.597296	0.760973	0.771285	0.556065		0.518614	0.485116	0.598123	0.536814	0.563853	0.418578	0.724777	0.579277	0.627588
968.982	1001.74	1001.84	1000.45	1007.11	1005.31	999.476	1004.66	999.072	1012.33	999.769	992.119	1001.28		32.7544	32.8544	31.4678	38.1243	36.3254	30.4942	35.6755	30.0904	43.3503	30.7872	23.1372	32.3029		0.958568		0.578504	0.636595	0.714754	0.687846	0.825186	0.72672	0.849953	0.568313	0.713524	0.73149	0.607953		0.485265	0.502624	0.611756	0.599275	0.725545	0.472958	0.782923	0.548997	0.55366
969.075	1002.68	1000.93	1001.38	1007.28	1004.25	1003.68	1002.09	1000.38	1012.8	1001.52	987.709	1001.2		33.6054	31.8554	32.3023	38.2007	35.1724	34.6037	33.0108	31.3096	43.7272	32.4487	18.6336	32.1262		0.96384		0.596799	0.620633	0.737745	0.693015	0.803389	0.829191	0.790794	0.594592	0.723686	0.775207	0.492309		0.507607	0.480777	0.643048	0.605911	0.691323	0.670582	0.697336	0.576453	0.569494
969.135	1001.45	1003.4	1002.28	1008.87	1008.6	1003.19	1003.34	1000.52	1013.9	999.7	986.08	1000.83		32.3151	34.2648	33.1491	39.7325	39.4608	34.0557	34.2085	31.3813	44.7623	30.5648	16.9445	31.6913		0.977066		0.581761	0.676737	0.767475	0.730697	0.913712	0.827259	0.830732	0.604133	0.750984	0.740222	0.453827		0.489242	0.557564	0.683514	0.654284	0.864529	0.666856	0.755116	0.58642	0.612024
968.854	1001.5	1004.28	1005.14	1007.73	1006.83	1006.97	1004.85	1000.64	1014.75	1001.11	987.203	1001.06		32.6427	35.4213	36.2814	38.872	37.979	38.1171	35.9976	31.7893	45.8967	32.2512	18.349	32.2051		0.96148		0.578284	0.688418	0.826595	0.703468	0.865373	0.911145	0.860234	0.602225	0.757733	0.768603	0.483605		0.484996	0.573552	0.763981	0.61933	0.788637	0.828637	0.797797	0.584427	0.622539
968.707	1000.14	1002.94	1007.59	1010.95	1006.07	1004.44	1013.87	999.065	1014.89	1000.13	986.431	1000.71		31.4371	34.2293	38.88	42.2385	37.3597	35.7303	45.1632	30.3573	46.1873	31.424	17.7241	32.004		0.96752		0.560425	0.66943	0.891363	0.769193	0.856609	0.859457	1.08604	0.578709	0.76732	0.753594	0.470069		0.463186	0.547564	0.852136	0.703704	0.774878	0.728953	1.12448	0.559859	0.637477
969.663	1004.18	1002.57	1005.42	1009.67	1004.44	1004.59	1015.46	1000.45	1015.74	999.971	989.037	1001.27		34.5149	32.9095	35.7582	40.0068	34.7745	34.9249	45.7971	30.7858	46.0734	30.3071	19.3734	31.6094		0.979598		0.622972	0.651654	0.830027	0.737648	0.807285	0.850571	1.11503	0.594205	0.774982	0.735883	0.520225		0.539569	0.523234	0.768652	0.663208	0.697441	0.711816	1.16642	0.576048	0.649414
968.674	1003.59	1004.35	1006.25	1008.19	1003.39	1004.2	1010.15	1000.86	1015.38	1003.06	988.914	1001.1		34.9208	35.6737	37.5738	39.5118	34.7194	35.5235	41.4752	32.1865	46.7024	34.3851	20.2402	32.4274		0.954889		0.614401	0.688571	0.850171	0.710144	0.785677	0.843327	0.984338	0.605569	0.765749	0.81384	0.529791		0.529102	0.57376	0.79607	0.627901	0.663517	0.697845	0.977341	0.587921	0.635028
969.195	1000.28	1003.48	1002.94	1008.57	1002.72	1007.92	1012.25	1001.51	1015.83	1001.37	988.268	1000.62		31.0887	34.2849	33.7473	39.3797	33.5265	38.7232	43.0583	32.3145	46.6346	32.176	19.0728	31.4299		0.985195		0.564338	0.682767	0.787824	0.730233	0.782762	0.948464	1.05434	0.627273	0.788905	0.785724	0.515079		0.467965	0.565817	0.711211	0.653689	0.658939	0.900609	1.07862	0.610596	0.671106
969.107	1001.97	1006.66	1004.93	1009.04	1006.81	1008.74	1012.29	1000.26	1015.23	1001.91	986.139	1000.82		32.8609	37.5547	35.8194	39.9303	37.7013	39.628	43.1781	31.1506	46.1273	32.8032	17.032	31.7106		0.976474		0.591227	0.741262	0.828794	0.733887	0.87244	0.962032	1.04792	0.599326	0.773414	0.793948	0.455892		0.500802	0.645876	0.766973	0.658381	0.799732	0.926776	1.06932	0.581399	0.646971
969.021	1001.94	1007.1	1000.2	1012.76	1004.63	1006.94	1011.23	1001.97	1015.8	1000.84	988.427	1000.3		32.9164	38.08	31.1744	43.7373	35.6094	37.9219	42.2118	32.9446	46.7741	31.8151	19.4053	31.2765		0.990024		0.600444	0.76206	0.731327	0.815012	0.835466	0.933389	1.03868	0.642638	0.795142	0.780718	0.526626		0.512057	0.674343	0.634312	0.762524	0.741685	0.871535	1.05596	0.626648	0.680824
969.04	1000.53	1011.37	1000.3	1015.11	1001.74	1007.99	1013.12	999.301	1014.71	1003.39	985.478	1000.14		31.4913	42.3343	31.2571	46.0726	32.7028	38.9487	44.0832	30.2612	45.6717	34.3488	16.4385	31.0994		0.995663		0.57772	0.852024	0.737444	0.863419	0.771643	0.964123	1.09091	0.593657	0.780824	0.847695	0.448654		0.484307	0.797472	0.642639	0.824666	0.641483	0.930809	1.13152	0.575476	0.658517
968.704	1000.08	1008.25	999.545	1011.42	1001.66	1007.52	1010.55	999.261	1017.51	1005.15	985.931	1000.11		31.3797	39.5448	30.8412	42.7184	32.9573	38.8126	41.8466	30.557	48.8036	36.4436	17.2265	31.4093		0.98584		0.569993	0.78803	0.720453	0.792662	0.769976	0.951276	1.02534	0.593546	0.826137	0.890519	0.465522		0.474871	0.709887	0.619513	0.733832	0.638866	0.906031	1.03666	0.575359	0.729116
968.969	1000.61	1007.51	1001.75	1010.79	1000.22	1005.4	1011.33	1000.25	1015.99	1003.26	988.772	1000.35		31.6424	38.5459	32.7857	41.8253	31.2516	36.4351	42.3629	31.281	47.0188	34.2911	19.8036	31.385		0.986605		0.575212	0.768721	0.766472	0.776693	0.730693	0.893698	1.0388	0.608081	0.796542	0.838573	0.535581		0.481244	0.683459	0.682148	0.713332	0.577192	0.794988	1.05613	0.590545	0.683006
968.739	999.991	1008.28	999.343	1011.52	1001.59	1006.86	1015.08	1000.21	1016.22	1001.93	990.788	1000.29		31.2522	39.5376	30.6039	42.7784	32.8479	38.1202	46.3419	31.4692	47.4821	33.1921	22.049	31.5546		0.981301		0.565063	0.784259	0.711618	0.79012	0.763886	0.930003	1.13026	0.60845	0.800066	0.807332	0.593099		0.46885	0.704725	0.607487	0.730569	0.629305	0.865006	1.18845	0.59093	0.688496
969.42	999.543	1006.82	1000.19	1012.15	1000.19	1006.45	1012.34	1000.89	1017.73	1003.06	985.456	999.824		30.1228	37.4004	30.768	42.7301	30.7689	37.0338	42.9174	31.4691	48.3049	33.6366	16.0358	30.404		1.01844		0.565254	0.76994	0.742508	0.819095	0.742616	0.93769	1.08635	0.631473	0.844732	0.849105	0.447673		0.469083	0.685128	0.649531	0.767765	0.595912	0.87983	1.12492	0.614984	0.758087
969.073	1000.47	1008.28	1000.57	1011.65	1001.51	1006.88	1011.56	1000.73	1018.78	1001.39	987.827	1000.13		31.3968	39.204	31.4947	42.5735	32.4327	37.8082	42.4828	31.6554	49.7024	32.3143	18.7537	31.0571		0.997021		0.576771	0.790098	0.744062	0.798932	0.766312	0.937167	1.05274	0.621854	0.850893	0.798572	0.512539		0.483148	0.712717	0.651646	0.741881	0.633114	0.878821	1.07629	0.604934	0.767686
968.907	1001.53	1006.59	1001.27	1010.54	1000.95	1005.59	1010.32	1001.69	1018.38	1002.97	989.19	999.748		32.6269	37.6838	32.3681	41.6365	32.0442	36.6783	41.4113	32.7794	49.4743	34.0618	20.2836	30.8409		1.00401		0.603571	0.764786	0.770057	0.786826	0.762441	0.915533	1.03338	0.648449	0.852926	0.847659	0.558238		0.515876	0.678073	0.687028	0.72634	0.627036	0.8371	1.04829	0.632719	0.770854
969.031	1000.28	1007.27	1000.4	1011.55	1001.73	1009.94	1011.89	1001.64	1016.21	1001.62	988.028	999.508		31.2455	38.2388	31.3742	42.5193	32.696	40.911	42.8567	32.6075	47.182	32.591	18.9972	30.4772		1.01599		0.584915	0.785311	0.75532	0.813099	0.787234	1.03337	1.08221	0.652747	0.823115	0.820737	0.529075		0.493093	0.706165	0.66697	0.760067	0.665961	1.06436	1.11894	0.63721	0.724407
969.123	1000.18	1007.89	999.275	1012.88	1000.82	1005.24	1010.77	1001.45	1015.91	1003.88	988.1	999.146		31.0539	38.7678	30.1522	43.7529	31.6925	36.1126	41.651	32.3308	46.7868	34.7587	18.9764	30.0231		1.03136		0.59012	0.808216	0.736879	0.849342	0.774613	0.925966	1.06767	0.656996	0.828565	0.888564	0.536489		0.49945	0.737514	0.64187	0.806595	0.646146	0.857221	1.0979	0.641649	0.732898
968.578	1001.22	1008.39	1000.85	1016.24	1003.23	1008.33	1010.33	1001.06	1017.24	1000.37	987.103	999.104		32.6383	39.8078	32.2736	47.6609	34.6572	39.751	41.7498	32.4799	48.6637	31.7971	18.525	30.5261		1.01436		0.610007	0.816222	0.775726	0.909959	0.833116	1.00246	1.05257	0.649149	0.847602	0.799459	0.515096		0.523737	0.748471	0.694744	0.884411	0.737995	1.00475	1.07605	0.633451	0.762559
968.372	1000.47	1005.92	1005.57	1011.15	999.47	1009.34	1006.64	1001.6	1015.28	1001.09	985.865	998.433		32.0932	37.5508	37.1949	42.7824	31.098	40.9666	38.2664	33.2322	46.9085	32.721	17.4937	30.0613		1.03005		0.609095	0.781851	0.907839	0.829449	0.759118	1.04909	0.979665	0.674456	0.829666	0.835411	0.493943		0.522623	0.701429	0.874562	0.781056	0.621819	1.09468	0.970581	0.65989	0.734613
968.898	1001.01	1004.78	999.711	1012.69	1002.5	1009.8	1009.24	1007.58	1017.88	999.06	987.879	998.711		32.1174	35.8865	30.8132	43.7914	33.6063	40.8984	40.3472	38.6814	48.9858	30.1623	18.9814	29.8137		1.0386		0.614616	0.753403	0.758322	0.856061	0.827158	1.05604	1.04151	0.791568	0.873601	0.776478	0.540398		0.529365	0.662493	0.671055	0.815219	0.728641	1.10809	1.06006	0.782242	0.803066
968.727	1000.61	1006.77	999.724	1017.03	1002.63	1007.26	1005.08	1002.44	1018.2	1000.64	988.904	998.662		31.8788	38.0447	30.9972	48.3025	33.9038	38.5303	36.3481	33.7093	49.469	31.9178	20.1769	29.9351		1.03439		0.607575	0.795471	0.759755	0.940415	0.831095	0.990861	0.934475	0.687021	0.878639	0.818336	0.572103		0.520766	0.720071	0.673006	0.923509	0.734821	0.982375	0.905203	0.673017	0.810915
968.25	1003.36	1006.87	1001.78	1013.2	1000.86	1011.22	1009.25	1010.67	1017.03	1000.07	989.642	998.153		35.1116	38.6158	33.5258	44.9535	32.6115	42.9732	40.9973	42.4223	48.7787	31.8164	21.3917	29.9026		1.03551		0.669915	0.808289	0.822625	0.876163	0.800284	1.10632	1.05515	0.865537	0.867319	0.816622	0.607207		0.596897	0.737614	0.758577	0.841025	0.686449	1.20504	1.07978	0.859521	0.793278
968.433	1003.45	1006.6	1000.97	1013.2	1001.48	1009.29	1006.28	1003.71	1017.26	999.802	985.874	998.067		35.0193	38.1697	32.5354	44.7713	33.0475	40.8535	37.8448	35.2809	48.8294	31.3697	17.4411	29.6342		1.04489		0.674206	0.806188	0.805554	0.880516	0.818329	1.06127	0.982832	0.726352	0.876085	0.81245	0.499552		0.602137	0.734739	0.735342	0.846613	0.71478	1.11817	0.975163	0.714108	0.806936
968.776	1004.87	1006.24	1000.94	1015.06	1001.5	1004.51	1005.36	1008.41	1016.11	1002.67	989.54	997.888		36.0939	37.4624	32.1615	46.2873	32.7201	35.7316	36.587	39.6317	47.3292	33.896	20.7641	29.1119		1.06364		0.707362	0.805445	0.810583	0.926663	0.824758	0.944872	0.967214	0.830564	0.864403	0.893629	0.605401		0.642627	0.733721	0.742187	0.905854	0.724874	0.893681	0.952567	0.822983	0.788735
968.791	1007.58	1004.89	1002.53	1013.44	1002.82	1006.53	1013.03	1003.44	1015.95	1002.47	989.609	997.959		38.7865	36.1037	33.7406	44.6534	34.0293	37.7412	44.2368	34.6481	47.1613	33.6834	20.8181	29.1686		1.06157		0.758653	0.774724	0.848729	0.892215	0.856091	0.996073	1.16717	0.72471	0.859662	0.886298	0.605795		0.705265	0.691675	0.794107	0.861632	0.774065	0.992426	1.24185	0.712393	0.781349
968.608	1008.73	1004.84	1001.08	1013.68	1002.82	1010.17	1013.7	1004.81	1017.03	1000.99	990.201	997.671		40.1171	36.2308	32.4761	45.069	34.216	41.5642	45.0899	36.1994	48.4256	32.3855	21.593	29.0629		1.06543		0.787534	0.780279	0.819893	0.903795	0.86392	1.10096	1.19401	0.759912	0.885919	0.855247	0.63063		0.740534	0.699278	0.754858	0.876497	0.786356	1.19471	1.28068	0.74917	0.822258
968.325	1009.37	1005.77	1002.81	1012.88	1002.92	1010.5	1009.07	1006.35	1017.72	1002.56	987.486	997.928		41.0493	37.4453	34.4863	44.5561	34.5946	42.173	40.7471	38.0272	49.3995	34.235	19.161	29.6034		1.04598		0.791122	0.791712	0.854747	0.877197	0.857532	1.09669	1.05931	0.783708	0.887237	0.887583	0.549386		0.744916	0.714926	0.802298	0.842352	0.776327	1.18648	1.0858	0.774031	0.824311
968.889	1008.64	1005.21	1000.19	1012.3	1000.79	1009.64	1008.29	1004.38	1017.51	1000.97	987.962	997.204		39.7469	36.321	31.3007	43.4079	31.8997	40.7496	39.4018	35.4905	48.6182	32.0771	19.0724	28.3152		1.09357		0.800872	0.802879	0.811087	0.893472	0.826706	1.10789	1.07094	0.764706	0.912931	0.869473	0.571725		0.756823	0.73021	0.742873	0.863245	0.72793	1.20807	1.10263	0.754178	0.864344
968.063	1010.58	1004.53	1000.59	1014.48	1002.12	1009.99	1005.33	1004.86	1017.12	1001.4	992.103	997.718		42.5156	36.47	32.5241	46.4207	34.0584	41.9268	37.269	36.7958	49.0591	33.3401	24.04	29.6542		1.04419		0.817977	0.769768	0.804733	0.91234	0.842792	1.08842	0.967227	0.757031	0.879613	0.862899	0.688098		0.777712	0.684892	0.734225	0.887467	0.753186	1.17053	0.952587	0.74616	0.812433
967.954	1010.7	1008.78	1001.43	1017.09	1001.14	1013.74	1008.53	1007.8	1015.69	1001.5	992.224	997.112		42.7457	40.8251	33.4779	49.1339	33.1841	45.7856	40.5715	39.8472	47.7332	33.5463	24.2701	29.1577		1.06197		0.836408	0.876366	0.842437	0.982108	0.835142	1.20884	1.07087	0.83377	0.870414	0.883022	0.706512		0.80022	0.830788	0.785543	0.977031	0.741176	1.40276	1.10252	0.826332	0.7981
967.944	1007.2	1007.33	1001.08	1015.91	1001.52	1009.88	1008.72	1011.94	1017.12	1000.3	991.26	997.403		39.2575	39.3823	33.1369	47.9647	33.5754	41.9343	40.7773	43.9931	49.1762	32.3565	23.3154	29.4584		1.05113		0.760313	0.836765	0.825345	0.948951	0.836365	1.09585	1.06531	0.911123	0.887573	0.84301	0.671793		0.707292	0.776588	0.762279	0.934467	0.743095	1.18486	1.09449	0.907146	0.824835
968.13	1010.37	1007.96	1000.08	1016.1	1000.21	1009.11	1009.03	1009.81	1016.85	999.802	993.18	997.463		42.2434	39.8335	31.946	47.9657	32.0771	40.9824	40.904	41.6762	48.7215	31.6724	25.0505	29.3329		1.05562		0.821641	0.849971	0.799085	0.953029	0.802458	1.07556	1.07319	0.866829	0.883127	0.828715	0.724872		0.782186	0.794662	0.726537	0.939701	0.689862	1.14572	1.10589	0.860871	0.817908
968.543	1009.59	1008.09	999.843	1016.5	1002.35	1013.58	1005.02	1010.77	1015.18	1001.08	991.516	997.479		41.0496	39.5476	31.2997	47.9606	33.8052	45.0386	36.4769	42.2227	46.6389	32.54	22.9725	28.936		1.07011		0.809376	0.855448	0.79366	0.966002	0.857293	1.19823	0.970168	0.890245	0.856976	0.863097	0.673863		0.767207	0.802159	0.719154	0.956355	0.775952	1.38229	0.956841	0.885334	0.777164
968.408	1016.86	1007.41	999.783	1015.97	1000.15	1007.99	1010.32	1010.48	1014.11	999.77	991.231	997.067		48.4492	39.0038	31.3748	47.5597	31.7434	39.5808	41.9113	42.0707	45.7064	31.3624	22.8234	28.6589		1.08045		0.964509	0.851842	0.803256	0.967188	0.812788	1.0632	1.12548	0.895616	0.847961	0.839905	0.675962		0.956658	0.797223	0.732215	0.957878	0.70608	1.12189	1.18154	0.890946	0.763119
967.758	1012.57	1009.14	999.937	1019.39	999.635	1007.82	1010.08	1010.44	1013.44	1001.03	991.695	997.3		44.8119	41.3855	32.1791	51.6299	31.8764	40.0656	42.3244	42.6791	45.6868	33.2696	23.9368	29.5417		1.04816		0.86544	0.876848	0.799229	1.01859	0.791803	1.04407	1.10261	0.881417	0.822269	0.864356	0.687752		0.835674	0.831448	0.726733	1.02386	0.673135	1.08498	1.14845	0.876111	0.723089
968.161	1016.05	1007.85	1000.2	1016.24	999.891	1006.57	1005.77	1014.25	1013.23	1002.27	990.63	997.075		47.8877	39.6842	32.0404	48.0774	31.7296	38.4117	37.6133	46.0861	45.0667	34.1056	22.4687	28.9133		1.07094		0.944943	0.859074	0.81308	0.969112	0.805287	1.02272	1.00118	0.972465	0.828737	0.905333	0.6596		0.932764	0.807121	0.745585	0.960347	0.694304	1.04382	1.0017	0.971233	0.733166
967.582	1011.24	1008.38	1000.04	1015.59	1001.4	1008.78	1011.53	1010.18	1014.31	1001.63	993.317	997.355		43.6579	40.7934	32.4545	48.0104	33.8229	41.2006	43.952	42.5953	46.7261	34.047	25.7352	29.7726		1.04004		0.836614	0.857599	0.799816	0.939831	0.833637	1.06532	1.13613	0.872863	0.834451	0.877691	0.733688		0.800471	0.805103	0.727533	0.922758	0.738813	1.12597	1.19695	0.867175	0.742069
968.077	1014.17	1009.2	1001.43	1016.24	999.737	1008.87	1007.55	1008.28	1012.72	1003.74	993.16	997.259		46.0946	41.1273	33.3523	48.1668	31.6591	40.788	39.4738	40.2056	44.6399	35.6598	25.0825	29.1813		1.06111		0.901205	0.882139	0.838596	0.961998	0.796118	1.07602	1.04105	0.840589	0.813349	0.937893	0.729572		0.87935	0.83869	0.780315	0.951216	0.679909	1.14661	1.05939	0.833456	0.709191
967.652	1015.73	1006.33	1001.97	1015.34	999.707	1006.15	1010.19	1010.15	1013.27	1002.8	995.27	997.029		48.0777	38.675	34.318	47.6896	32.0549	38.4975	42.5416	42.4952	45.6163	35.149	27.618	29.377		1.05404		0.933716	0.824013	0.857129	0.946122	0.8007	1.00883	1.11448	0.882538	0.825602	0.918301	0.797968		0.919053	0.759134	0.805541	0.930834	0.687102	1.01702	1.16562	0.877282	0.728281
967.417	1015.38	1006.77	1001.57	1014.79	1000.37	1009.95	1010.58	1011.98	1015.86	1002.4	990.811	997.047		47.9587	39.3544	34.1489	47.3754	32.9482	42.5333	43.1594	44.5604	48.4386	34.98	23.3937	29.6299		1.04504		0.923455	0.831332	0.845626	0.931866	0.815989	1.10507	1.12102	0.917529	0.869199	0.906086	0.670146		0.906523	0.769151	0.789884	0.912534	0.711106	1.20264	1.17508	0.913839	0.796208
967.225	1016.33	1006.23	1002.32	1014.72	999.31	1007.79	1003.88	1005.58	1011.87	1001.72	993.157	996.3		49.1083	39.0083	35.0982	47.4948	32.0857	40.568	36.653	38.3567	44.6498	34.4942	25.932	29.0755		1.06497		0.963623	0.839734	0.885708	0.95203	0.809782	1.07411	0.970174	0.804852	0.816491	0.910541	0.757026		0.955576	0.780652	0.844439	0.938419	0.701361	1.14293	0.95685	0.79612	0.714086
967.889	1012.21	1007.33	1000.06	1016.16	1000.41	1008.31	1004.76	1008.8	1014.67	1004.48	994.987	997.005		44.3193	39.4369	32.1731	48.2724	32.5237	40.4176	36.8748	40.9156	46.7848	36.5896	27.0988	29.1162		1.06348		0.868435	0.847774	0.810758	0.966264	0.819689	1.06863	0.974681	0.857346	0.854336	0.964503	0.789982		0.839332	0.791655	0.742425	0.956691	0.716914	1.13236	0.96337	0.850963	0.773051
967.369	1015.38	1006.91	999.526	1015.24	1005.12	1007.03	1007.35	1007.28	1011.36	1003.84	995.408	996.435		48.0132	39.5392	32.1568	47.8688	37.7478	39.6617	39.9815	39.91	43.9921	36.4684	28.039	29.0663		1.06531		0.942432	0.851432	0.811737	0.959829	0.952983	1.05044	1.05861	0.83771	0.804717	0.962957	0.818793		0.929697	0.796661	0.743758	0.948431	0.926185	1.09729	1.08479	0.830448	0.695743
967.822	1014.3	1009.69	1000.02	1019.12	1001.99	1010.98	1004.25	1009.07	1012.52	1001.01	996.335	996.573		46.4778	41.8723	32.2014	51.2978	34.1717	43.1551	36.4296	41.2468	44.6932	33.1907	28.513	28.7512		1.07698		0.922294	0.911556	0.821773	1.03986	0.872157	1.1555	0.975138	0.875259	0.826503	0.886016	0.841761		0.905105	0.87895	0.757418	1.05117	0.799289	1.29989	0.964032	0.869677	0.729686
967.566	1016.78	1007.27	999.997	1016.95	1004.5	1009.58	1006.64	1008.86	1009.95	1003.77	994.15	996.486		49.2129	39.7064	32.4312	49.3807	36.9301	42.0166	39.0756	41.293	42.3837	36.2017	26.5839	28.9197		1.07071		0.970876	0.859365	0.822813	0.995163	0.937065	1.11845	1.03987	0.871131	0.779225	0.96076	0.780236		0.964433	0.80752	0.758834	0.993791	0.901193	1.22845	1.05768	0.865365	0.656025
967.768	1016.95	1006.98	999	1017.16	1004.94	1007.98	1005.89	1007.78	1012.07	1002.13	993.746	996.933		49.1865	39.2145	31.2328	49.392	37.1713	40.208	38.1182	40.0148	44.3012	34.3611	25.9785	29.1658		1.06167		0.962169	0.841559	0.785724	0.986994	0.935228	1.06128	1.00583	0.837045	0.807608	0.904219	0.756035		0.953801	0.783149	0.708351	0.983303	0.898309	1.11819	1.00844	0.829753	0.700246
966.826	1015.19	1004.91	1000.82	1015.14	1009.43	1010.36	1006.22	1008.09	1010.43	1003.39	993.158	996.751		48.3598	38.0818	33.99	48.3125	42.6032	43.5356	39.3893	41.2648	43.5991	36.5624	26.3321	29.9247		1.03475		0.922005	0.796524	0.8334	0.940937	1.04471	1.11997	1.01301	0.841301	0.774651	0.937745	0.74689		0.904752	0.721512	0.773243	0.924179	1.07019	1.23137	1.01883	0.8342	0.648898
967.015	1015.58	1005.09	1000.84	1014.59	1011.82	1008.85	1005.35	1005.35	1012.68	1005.15	995.291	996.945		48.5681	38.0715	33.8201	47.5789	44.8033	41.8375	38.3364	38.3343	45.6666	38.133	28.2765	29.93		1.03457		0.925814	0.796169	0.829089	0.926487	1.09847	1.0761	0.985761	0.781416	0.811242	0.977855	0.801901		0.909403	0.721025	0.767375	0.905628	1.15459	1.14676	0.979401	0.771636	0.705909
967.406	1013.28	1007.97	1000.13	1018.29	1011.95	1007.67	1008.86	1006	1012.48	1003.26	997.447	996.661		45.8759	40.5658	32.7192	50.8889	44.548	40.2679	41.4572	38.5938	45.075	35.8536	30.0406	29.2553		1.05843		0.894665	0.867897	0.820601	1.0138	1.1174	1.05961	1.0906	0.804851	0.819202	0.94061	0.871579		0.871363	0.819197	0.755822	1.01771	1.18431	1.11497	1.13107	0.79612	0.71831
967.155	1014.06	1006.44	1000.01	1017.15	1009.55	1008.42	1011.44	1005.34	1013.04	1001.93	995.432	996.497		46.9085	39.2819	32.8544	49.9995	42.3913	41.263	44.2845	38.1855	45.8859	34.7764	28.2778	29.342		1.0553		0.912095	0.837941	0.821553	0.993131	1.06016	1.08258	1.16152	0.79398	0.831471	0.90965	0.818005		0.892649	0.778197	0.757118	0.991181	1.09444	1.15927	1.23368	0.784761	0.737426
967.02	1015.96	1006.35	1001.59	1015.1	1006.21	1008.18	1003.64	1007.48	1013.05	1003.06	997.463	997		48.9445	39.3348	34.5658	48.076	39.1949	41.1576	36.6197	40.4592	46.0299	36.0373	30.4433	29.98		1.03284		0.931433	0.821215	0.845956	0.934605	0.95936	1.05684	0.940048	0.823355	0.816332	0.922573	0.861909		0.916265	0.755305	0.790332	0.91605	0.936195	1.10962	0.913266	0.815451	0.713839
966.589	1015.29	1008.08	1000.16	1017.39	1005.76	1006.56	1003.76	1008.8	1015.95	1001.21	998.159	996.529		48.7048	41.4953	33.5669	50.8035	39.1703	39.9751	37.1681	42.2104	49.3567	34.6219	31.5696	29.9394		1.03424		0.928129	0.867497	0.822624	0.988968	0.960059	1.02787	0.955421	0.860158	0.87652	0.887541	0.89501		0.91223	0.818649	0.758576	0.985838	0.937293	1.05375	0.935507	0.853901	0.807614
967.121	1014.8	1008.93	1001.66	1018.79	1001.59	1005.34	1003.53	1009.62	1014.9	1001.99	999.178	996.66		47.6789	41.8116	34.5366	51.6737	34.4664	38.2176	36.4081	42.4957	47.7784	34.8693	32.0572	29.5385		1.04828		0.920911	0.885974	0.857876	1.01956	0.856233	0.996019	0.948587	0.877726	0.860008	0.906016	0.921169		0.903416	0.843937	0.806557	1.02511	0.774287	0.992322	0.92562	0.872255	0.781887
[truncated: 2 more columns]

## Sheet: MP-4pd2
background	syp-4(S269A)2-MP_n1	syp-4(S269A)2-MP_n2	syp-4(S269A)2-MP_n3	syp-4(S269A)2-MP_n4	syp-4(S269A)2-MP_n5	syp-4(S269A)2-MP_n6	syp-4(S269A)2-MP_n7	syp-4(S269A)2-MP_n8	syp-4(S269A)2-MP_n9	syp-4(S269A)2-MP_n10	syp-4(S269A)2-MP_n11	unfrapped nuclei		syp-4(S269A)2-MP_n1	syp-4(S269A)2-MP_n2	syp-4(S269A)2-MP_n3	syp-4(S269A)2-MP_n4	syp-4(S269A)2-MP_n5	syp-4(S269A)2-MP_n6	syp-4(S269A)2-MP_n7	syp-4(S269A)2-MP_n8	syp-4(S269A)2-MP_n9	syp-4(S269A)2-MP_n10	syp-4(S269A)2-MP_n11	unfrapped nuclei		ROI2		syp-4(S269A)2-MP_n1	syp-4(S269A)2-MP_n2	syp-4(S269A)2-MP_n3	syp-4(S269A)2-MP_n4	syp-4(S269A)2-MP_n5	syp-4(S269A)2-MP_n6	syp-4(S269A)2-MP_n7	syp-4(S269A)2-MP_n8	syp-4(S269A)2-MP_n9	syp-4(S269A)2-MP_n10	syp-4(S269A)2-MP_n11		syp-4(S269A)2-MP_n1	syp-4(S269A)2-MP_n2	syp-4(S269A)2-MP_n3	syp-4(S269A)2-MP_n4	syp-4(S269A)2-MP_n5	syp-4(S269A)2-MP_n6	syp-4(S269A)2-MP_n7	syp-4(S269A)2-MP_n8	syp-4(S269A)2-MP_n9
972.131	1029.3	1032.79	1019.06	1008.98	1030.73	1012.26	1022.26	1015.2	1039.51	1029.85	1009.38	994.887		57.1659	60.6625	46.9266	36.8447	58.6019	40.1333	50.1333	43.0687	67.3812	57.7216	37.2506	22.7556		0.993623		1.03289	1.00288	1.09589	0.976645	1.01583	1.12694	1.09757	0.965756	1.04597	1.01405	1.09565		1.03739	1.00321	1.10794	0.973814	1.01676	1.148	1.10477	0.959495	1.05077
972.759	1025.58	1032.3	1010.93	1010.88	1028.8	1003.4	1013.4	1018.31	1033.4	1028.16	1003.07	995.224		52.8199	59.5431	38.1686	38.1258	56.0401	30.6375	40.6375	45.5543	60.6372	55.3966	30.3131	22.4654		1.00646		0.966689	0.997086	0.902874	1.02366	0.983968	0.871415	0.90117	1.03469	0.953439	0.985772	0.903115		0.962131	0.996749	0.890661	1.02652	0.983019	0.85009	0.893879	1.04103	0.948574
971.658	978.57	978.168	976.62	975.889	975.003	976.913	974.913	978.809	977.979	992.284	978.781	995.265		6.91182	6.51012	4.96212	4.23092	3.34562	5.25562	3.25562	7.15102	6.32152	20.6259	7.12312	23.6072		0.957781		0.120379	0.103743	0.111701	0.108104	0.0559022	0.142255	0.0687043	0.154567	0.09459	0.349283	0.201954		0	0	0	0	0	0	0	0	0
971.788	981.903	976.838	981.734	980.626	980.213	982.917	979.917	976.183	982.239	993.256	980.809	995.275		10.1149	5.04997	9.94547	8.83767	8.42477	11.1286	8.12857	4.39437	10.4511	21.4679	9.02037	23.4865		0.962702		0.17707	0.0808883	0.225031	0.22697	0.141493	0.302766	0.172421	0.0954711	0.157185	0.365408	0.257059		0.0644492	-0.0255006	0.12758	0.133274	0.0906592	0.187132	0.111368	-0.0699006	0.069134
971.155	986.047	973.641	985.057	981.812	984.482	980.31	980.31	977.269	989.139	988.977	981.327	995.577		14.8915	2.48527	13.9013	10.6569	13.3268	9.15477	9.15477	6.11367	17.9835	17.8219	10.1721	24.4213		0.92585		0.25071	0.0382842	0.302497	0.263215	0.215254	0.239532	0.186755	0.12774	0.260119	0.291737	0.278783		0.148167	-0.0730362	0.214787	0.173911	0.168788	0.113411	0.12676	-0.0317323	0.182822
971.782	986.354	972.211	989.454	983.564	983.771	980.474	980.474	981.851	984.194	986.162	982.569	995.534		14.5711	0.42849	17.6712	11.782	11.9888	8.69129	8.69129	10.069	12.4112	14.3798	10.7866	23.7512		0.951975		0.252238	0.0067869	0.395381	0.299215	0.199107	0.233822	0.182303	0.216319	0.184585	0.242033	0.303967		0.149904	-0.108179	0.319352	0.214275	0.151684	0.106754	0.121979	0.0730416	0.0993969
970.725	983.717	976.622	992.758	984.154	982.971	981.781	981.781	979.83	990.761	988.286	981.209	995.027		12.9912	5.89644	22.0322	13.4283	12.2454	11.0557	11.0557	9.10404	20.0353	17.5601	10.4837	24.3013		0.930425		0.219799	0.0912802	0.481798	0.333306	0.198766	0.2907	0.226649	0.191161	0.29123	0.288873	0.288745		0.113025	-0.0139059	0.416635	0.252498	0.151323	0.173065	0.169596	0.0432837	0.217183
971.027	988.169	977.581	992.463	986.695	989.29	982.366	982.366	985.202	992.956	991.427	981.446	995.373		17.142	6.55393	21.436	15.6671	18.2623	11.339	11.339	14.1743	21.9284	20.3997	10.4182	24.3456		0.928729		0.289497	0.101274	0.467906	0.388167	0.295891	0.297605	0.232032	0.297081	0.318166	0.334974	0.286418		0.192262	-0.00275575	0.400996	0.314008	0.254199	0.181115	0.175377	0.168569	0.246934
970.705	990.012	971.139	993.278	987.772	986.495	978.598	978.598	978.232	987.171	992.505	983.068	994.851		19.3073	0.43497	22.5736	17.0678	15.7901	7.89377	7.89377	7.52737	16.4665	21.8	12.3635	24.1463		0.936396		0.328756	0.00677679	0.496804	0.42636	0.257947	0.208891	0.162865	0.159069	0.240889	0.360922	0.342702		0.236894	-0.108191	0.433528	0.356831	0.214008	0.0776881	0.101107	0.00532503	0.161584
971.521	991.598	971.801	991.515	998.677	985.383	981.117	981.117	980.949	990.829	994.527	985.454	994.781		20.0769	0.28015	19.9946	27.1562	13.8621	9.59615	9.59615	9.42845	19.3085	23.0059	13.9336	23.2598		0.972084		0.354889	0.00453106	0.456817	0.704225	0.235083	0.263619	0.205534	0.206837	0.293232	0.395403	0.400945		0.266603	-0.110696	0.388513	0.668375	0.18979	0.141492	0.146924	0.0618255	0.219394
971.914	992.409	979.101	998.543	991.742	985.21	982.549	982.549	978.961	993.123	993.712	987.039	995.113		20.4953	7.18694	26.6294	19.8282	13.296	10.6353	10.6353	7.04724	21.2089	21.7979	15.1253	23.1992		0.974626		0.363234	0.116543	0.609993	0.515539	0.226072	0.292931	0.228388	0.155003	0.322935	0.375622	0.436375		0.27609	0.0142815	0.560951	0.456819	0.180246	0.175666	0.171464	0.000515465	0.2522
971.245	990.671	986.042	1001.33	993.546	989.861	987.295	987.295	979.627	997.347	991.543	986.59	995.209		19.4266	14.7974	30.0815	22.3013	18.6162	16.0498	16.0498	8.38199	26.1026	20.2977	15.3455	23.9639		0.943522		0.333305	0.232296	0.667078	0.561335	0.306429	0.427954	0.333661	0.178477	0.384763	0.338607	0.428597		0.242066	0.143433	0.625214	0.508165	0.265361	0.333082	0.284503	0.0282812	0.320488
971.933	995.298	984.343	1003.25	997.49	988.827	986.158	986.158	978.166	1003.38	989.575	985.692	995.259		23.3652	12.4099	31.3142	25.5574	16.8945	14.2257	14.2257	6.23326	31.4457	17.6421	13.7594	23.3261		0.969322		0.411841	0.200143	0.713401	0.660881	0.285692	0.389687	0.303825	0.136354	0.476197	0.302353	0.394805		0.33135	0.107558	0.677362	0.619778	0.243396	0.288469	0.252467	-0.0215437	0.421474
971.836	998.117	987.48	1006.15	997.99	992.116	983.496	983.496	980.843	1008.01	986.532	988.377	994.825		26.2813	15.6448	34.3172	26.1547	20.28	11.6608	11.6608	9.00753	36.177	14.6966	16.5412	22.9897		0.983506		0.470022	0.256008	0.793258	0.686226	0.347962	0.324103	0.252691	0.199925	0.555863	0.25556	0.481572		0.397492	0.169889	0.76726	0.648194	0.309353	0.212007	0.19756	0.0536498	0.509463
971.395	997.362	990.08	1002.1	998.422	995.968	982.915	982.915	980.501	1002.95	989.346	988.125	995.165		25.9674	18.6848	30.7042	27.0266	24.573	11.5203	11.5203	9.10618	31.5535	17.9508	16.7302	23.7704		0.951202		0.449153	0.29571	0.686428	0.68581	0.407772	0.309679	0.241446	0.195476	0.468897	0.301893	0.471075		0.373768	0.214187	0.646998	0.647728	0.372704	0.195191	0.185485	0.0483874	0.413412
971.97	1003.28	989.66	1010.4	1000.94	989.028	985.286	985.286	979.843	1014.18	996.686	992.318	994.93		31.3144	17.6903	38.4353	28.9746	17.0584	13.3161	13.3161	7.87307	42.2132	24.7158	20.3479	22.9601		0.984774		0.560756	0.289852	0.889594	0.761191	0.293063	0.370586	0.288933	0.17497	0.649445	0.430337	0.593161		0.500644	0.207651	0.87571	0.732245	0.251203	0.266199	0.236475	0.0241332	0.612822
970.972	1004.11	994.316	1010.13	1003.93	989.338	982.346	982.346	977.465	1011.74	1000.76	993.088	994.653		33.14	23.3438	39.1565	32.9606	18.3665	11.3737	11.3737	6.49344	40.7686	29.7871	22.1166	23.6812		0.954789		0.575379	0.370839	0.878692	0.839542	0.305929	0.306893	0.239273	0.139915	0.608123	0.502844	0.625091		0.517268	0.298012	0.863438	0.820094	0.264832	0.191943	0.183152	-0.0173307	0.567182
971.77	1002.85	995.451	1010.87	1005.79	999.615	982.741	982.741	978.604	1014.34	1000.9	990.996	994.747		31.0794	23.6813	39.0989	34.0218	27.8453	10.9713	10.9713	6.8341	42.5734	29.1265	19.2258	22.9774		0.984034		0.55613	0.387723	0.904273	0.893115	0.478023	0.305101	0.237877	0.151766	0.654495	0.506753	0.56003		0.495385	0.31685	0.892236	0.880159	0.447115	0.189855	0.181653	-0.00331326	0.618399
971.41	1002.69	996.276	1012.69	1006.7	998.513	990.073	990.073	983.987	1015.96	997.389	993.063	994.804		31.2796	24.8664	41.2775	35.2907	27.1028	18.6636	18.6636	12.577	44.5482	25.9787	21.6528	23.3939		0.966514		0.549747	0.399877	0.937663	0.90993	0.456992	0.509776	0.397454	0.274327	0.672661	0.443939	0.619496		0.488128	0.330412	0.929824	0.899013	0.424839	0.428474	0.353003	0.141655	0.638463
971.316	1006.79	994.5	1012.31	1006.33	999.246	988.324	988.324	987.028	1015.06	999.408	991.234	994.644		35.4765	23.1843	40.995	35.0153	27.9303	17.0082	17.0082	15.7118	43.7414	28.0915	19.9184	23.3278		0.969253		0.625276	0.373884	0.933885	0.905388	0.47228	0.465878	0.363229	0.343674	0.66235	0.481404	0.57149		0.573993	0.30141	0.925571	0.893921	0.441032	0.377295	0.316252	0.223681	0.627075
970.95	1004.9	995.216	1008.05	1006.26	998.037	992.579	992.579	986.748	1011.09	998.329	996.243	994.652		33.9488	24.2666	37.1045	35.3057	27.0874	21.6288	21.6288	15.7981	40.1423	27.379	25.2934	23.7018		0.953958		0.588907	0.385161	0.831917	0.89849	0.450798	0.583091	0.454616	0.340108	0.598258	0.461789	0.714253		0.532647	0.313992	0.810781	0.886186	0.418279	0.513948	0.414381	0.219462	0.556287
969.972	1004.87	999.589	1008.89	1005.71	1001.51	993.878	993.878	982.328	1016.48	995.582	992.927	994.605		34.9007	29.6175	38.917	35.7403	31.5332	23.9065	23.9065	12.356	46.5033	25.6103	22.9552	24.6335		0.917876		0.582522	0.452312	0.839555	0.87515	0.504939	0.620122	0.483487	0.255945	0.666847	0.415621	0.62371		0.525389	0.388917	0.819379	0.860018	0.475626	0.55712	0.445382	0.119912	0.632042
969.88	1002.8	995.402	1008.93	1007.71	1000.94	999.194	999.194	984.041	1017.62	999.379	996.94	994.446		32.9216	25.5212	39.0471	37.8299	31.0596	29.314	29.314	14.1609	47.7435	29.4982	27.0595	24.5654		0.920422		0.551012	0.390835	0.844697	0.928885	0.498734	0.762497	0.594492	0.294145	0.686529	0.480043	0.737265		0.489567	0.320323	0.825168	0.920265	0.469053	0.723108	0.564577	0.165096	0.65378
969.217	1008.5	998.606	1011.86	1004.93	1000.55	998.052	998.052	985.467	1018.68	994.311	994.933	994.602		39.2859	29.3892	42.6472	35.714	31.3345	28.835	28.835	16.2498	49.4681	25.0942	25.7163	25.3848		0.890712		0.636308	0.435542	0.892797	0.848624	0.486907	0.725827	0.565902	0.32664	0.688367	0.395192	0.678051		0.586535	0.370205	0.879316	0.830276	0.456526	0.680356	0.533877	0.203531	0.65581
970.647	1015.31	1000.79	1012.6	1008.08	1001.1	1004.24	1004.24	984.227	1014.24	991.086	998.537	994.507		44.6624	30.142	41.9547	37.4302	30.4512	33.5913	33.5913	13.5801	43.5926	20.4389	27.8894	23.86		0.94763		0.769616	0.475243	0.934425	0.946239	0.503419	0.899584	0.701374	0.290419	0.645371	0.342447	0.782338		0.738088	0.414502	0.926179	0.939722	0.474015	0.88293	0.679343	0.160689	0.608322
970.457	1014.04	1007.58	1009.51	1004.88	1001.74	1000.91	1000.91	986.308	1017.06	992.131	997.487	994.394		43.5865	37.1193	39.0487	34.4262	31.2779	30.4512	30.4512	15.8504	46.6042	21.6741	27.0299	23.9368		0.944593		0.74867	0.583378	0.866915	0.867508	0.515429	0.812878	0.633772	0.337885	0.687745	0.361979	0.755798		0.714274	0.535153	0.850179	0.851449	0.486736	0.781844	0.606754	0.216833	0.655123
971.389	1011.1	1006.48	1013.25	1004.95	1002.53	998.281	998.281	989.342	1016.41	993.021	996.561	994.126		39.7078	35.0902	41.8587	33.5635	31.1373	26.8917	26.8917	17.9533	45.0188	21.6324	25.1722	22.7374		0.994421		0.718024	0.580579	0.978319	0.890383	0.540178	0.755725	0.589213	0.4029	0.699393	0.38034	0.740982		0.679435	0.53203	0.975593	0.877097	0.512951	0.715213	0.558908	0.293735	0.667988
970.373	1015.34	1005.62	1015.82	1007.46	1007.35	999.051	999.051	986.256	1015.4	998.255	995.594	994.423		44.9696	35.2479	45.4507	37.0832	36.9725	28.6783	28.6783	15.8827	45.031	27.8822	25.2207	24.0503		0.940134		0.76878	0.551351	1.00428	0.930051	0.606394	0.761937	0.594056	0.336975	0.661392	0.463462	0.701881		0.737137	0.499419	1.00482	0.921572	0.583088	0.722455	0.564108	0.215756	0.626017
970.286	1015.64	1005.68	1014.59	1008.8	1009.51	1005.56	1005.56	989.429	1010.63	997.315	998.317	994.618		45.3509	35.3977	44.309	38.5094	39.2273	35.2718	35.2718	19.1432	40.3475	27.029	28.0312	24.3319		0.929253		0.766326	0.547286	0.967723	0.954642	0.635929	0.92627	0.72218	0.401451	0.585745	0.44408	0.771068		0.734347	0.494884	0.963664	0.949144	0.614372	0.914042	0.701685	0.29202	0.542467
970.496	1014.24	1008.04	1012.78	1011.86	1007.29	1012.67	1012.67	987.873	1010.27	999.741	998.933	994.779		43.7463	37.5486	42.2874	41.3648	36.7963	42.1756	42.1756	17.377	39.7699	29.2455	28.4372	24.2833		0.931114		0.740693	0.581705	0.925421	1.02748	0.597715	1.10979	0.865264	0.365142	0.578516	0.48146	0.783803		0.705206	0.533286	0.916043	1.03081	0.573894	1.128	0.855324	0.249074	0.534483
970.33	1012.62	1008.66	1014.08	1010.21	1005.97	1010.54	1010.54	990.519	1012.9	999.431	996.863	994.666		42.2901	38.3267	43.7503	39.8801	35.6359	40.2109	40.2109	20.1896	42.5681	29.1013	26.5336	24.3361		0.929095		0.714483	0.59247	0.955357	0.988452	0.577609	1.05579	0.823166	0.423322	0.617877	0.478046	0.729747		0.675409	0.545298	0.949744	0.987053	0.552598	1.06505	0.810121	0.31789	0.577955
970.502	1019.5	1006.32	1014.41	1008.51	1007.11	1009.62	1009.62	992.748	1011.97	998.764	999.612	994.46		48.9979	35.816	43.9064	38.0121	36.6059	39.123	39.123	22.2461	41.4638	28.2616	29.1104	23.9579		0.94376		0.840876	0.562398	0.973899	0.957023	0.602696	1.04344	0.813537	0.473803	0.611347	0.47158	0.813253		0.8191	0.511744	0.970617	0.951814	0.579171	1.05065	0.799781	0.377601	0.570744
970.161	1019.94	1009.11	1013.01	1007.01	1007.87	1012.19	1012.19	995.845	1011.84	1005.32	997.617	994.853		49.7807	38.9459	42.8537	36.8472	37.7115	42.0337	42.0337	25.6841	41.6816	35.1549	27.456	24.6919		0.915706		0.828915	0.593366	0.922295	0.900118	0.602442	1.08775	0.84808	0.530766	0.59629	0.569166	0.744233		0.805501	0.546297	0.912523	0.888012	0.578902	1.1023	0.836873	0.444977	0.554113
970.899	1016.12	1009.25	1013.67	1008.32	1012.12	1007.49	1007.49	992.815	1010.45	1005.05	997.624	994.957		45.2233	38.3484	42.7694	37.4177	41.2233	36.5924	36.5924	21.9166	39.5492	34.1514	26.7256	24.0582		0.939824		0.772863	0.599652	0.944724	0.938132	0.67589	0.971883	0.757743	0.464841	0.580687	0.567483	0.743518		0.741779	0.553311	0.937774	0.930633	0.656699	0.96722	0.739871	0.366999	0.536881
970.302	1015.14	1012.85	1014.3	1011.71	1007.67	1009.12	1009.12	996.751	1011.2	1005.01	998.45	995.029		44.8366	42.5492	43.9958	41.4088	37.3684	38.8194	38.8194	26.4486	40.8961	34.7085	28.1479	24.7271		0.914401		0.745526	0.647341	0.945524	1.01011	0.596111	1.00314	0.782112	0.545786	0.584219	0.561138	0.761902		0.7107	0.60652	0.938674	1.01134	0.572196	1.00366	0.766038	0.462744	0.540782
969.814	1009.9	1011.1	1019.56	1010.27	1007.46	1008.63	1008.63	997.812	1010.79	1009.79	996.396	994.894		40.0882	41.284	49.7492	40.4566	37.6505	38.8144	38.8144	27.9979	40.9737	39.9762	26.5819	25.0804		0.901521		0.657182	0.619246	1.05411	0.972982	0.592152	0.988883	0.770997	0.569619	0.577084	0.637199	0.709379		0.610266	0.575173	1.06092	0.969708	0.568002	0.987039	0.754103	0.490935	0.532901
970.864	1009.72	1012.07	1015.67	1009.09	1005.58	1014.41	1014.41	993.63	1017.29	1009.93	995.849	994.462		38.8564	41.202	44.8021	38.2301	34.7166	43.5425	43.5425	22.7661	46.4219	39.0682	24.9842	23.5974		0.95818		0.677022	0.656856	1.00895	0.977218	0.580323	1.17906	0.919272	0.492287	0.694908	0.661862	0.708644		0.632821	0.617136	1.01008	0.974457	0.555473	1.20876	0.913316	0.399464	0.663034
970.34	1012.36	1011.33	1017.57	1009.79	1002.29	1010.02	1010.02	989.226	1012.01	1014.78	995.987	995.262		42.0218	40.9919	47.2336	39.4518	31.9515	39.6828	39.6828	18.886	41.672	44.4432	25.6476	24.9222		0.907242		0.693252	0.618766	1.00716	0.954838	0.505709	1.01742	0.793249	0.386676	0.590643	0.712896	0.68879		0.651273	0.574638	1.00806	0.949364	0.476441	1.02031	0.777996	0.274544	0.547877
970.29	1015.65	1013.73	1017.62	1009.67	1002.49	1007.66	1007.66	993.43	1014.1	1015.16	999.461	995.034		45.3578	43.4364	47.3255	39.3807	32.2	37.3659	37.3659	23.14	43.8129	44.8703	29.1706	24.7437		0.913788		0.753686	0.660396	1.0164	0.959993	0.513319	0.964932	0.752323	0.477191	0.625468	0.724939	0.789055		0.719977	0.621086	1.01846	0.955144	0.484501	0.959116	0.734051	0.381607	0.586339
969.671	1013.2	1012.52	1016.72	1009.94	1009.73	1012.08	1012.08	994.661	1016	1013.24	1000.82	995.354		43.5271	42.8475	47.0472	40.2733	40.0555	42.4049	42.4049	24.9905	46.3249	43.5657	31.1486	25.6835		0.880352		0.696801	0.627607	0.973454	0.945831	0.615184	1.05499	0.82254	0.496496	0.637131	0.678107	0.811731		0.655307	0.584502	0.970116	0.939266	0.592399	1.06411	0.809448	0.404442	0.599222
970.385	1016.46	1011.92	1017.53	1008.13	1001.2	1009.15	1009.15	997.338	1013.61	1014.18	998.035	994.926		46.0743	41.5359	47.1429	37.7435	30.8116	38.7665	38.7665	26.9522	43.2288	43.7986	27.6498	24.5408		0.921342		0.771921	0.636721	1.02085	0.927689	0.495246	1.00938	0.786975	0.5604	0.622231	0.713474	0.7541		0.740707	0.594671	1.02347	0.918924	0.465358	1.01093	0.77126	0.48003	0.582764
970.308	1013.48	1008.69	1016.38	1007.9	1002.54	1010.03	1010.03	995.641	1015.69	1011.92	1000.49	994.985		43.1687	38.3773	46.0768	37.5922	32.2349	39.7235	39.7235	25.3336	45.3831	41.6171	30.1784	24.677		0.916258		0.71925	0.585056	0.992259	0.918872	0.515264	1.02859	0.801953	0.523839	0.649635	0.674197	0.818522		0.680829	0.537025	0.991285	0.909039	0.486562	1.03333	0.787343	0.436784	0.613032
970.206	1014.54	1014.26	1014.21	1008.95	1010.07	1015.9	1015.9	993.567	1015.62	1011.72	1001.79	994.809		44.3317	44.054	44.0056	38.745	39.862	45.6967	45.6967	23.3615	45.4122	41.5112	31.5862	24.6036		0.91899		0.74083	0.673599	0.950482	0.949875	0.639082	1.18678	0.925294	0.484502	0.65199	0.674487	0.859261		0.705362	0.635818	0.944255	0.943799	0.617711	1.21776	0.919783	0.390255	0.615633
969.633	1009.37	1012.15	1015.77	1009.52	1007.07	1009.63	1009.63	993.746	1013.79	1012.24	1002.72	994.886		39.7345	42.5135	46.1361	39.8897	37.4405	39.9958	39.9958	24.1135	44.1524	42.6081	33.0857	25.2534		0.895346		0.646923	0.63332	0.970861	0.952778	0.584816	1.012	0.789023	0.487232	0.617594	0.674499	0.876897		0.598603	0.590877	0.967197	0.947055	0.560232	1.01399	0.773459	0.393484	0.577644
969.867	1010.27	1010.98	1015.06	1006.27	1010.39	1011.93	1011.93	998.82	1014.21	1011.07	1001.36	994.998		40.4072	41.1175	45.1897	36.3988	40.5241	42.059	42.059	28.9536	44.3473	41.2053	31.4911	25.1315		0.899689		0.661065	0.615494	0.955557	0.873612	0.636051	1.06937	0.833748	0.587866	0.623328	0.655455	0.83868		0.614681	0.570987	0.949968	0.858293	0.6145	1.08087	0.821483	0.512517	0.583977
969.866	1014.37	1011.76	1016.06	1007.6	1011.18	1007.66	1007.66	996.422	1010.88	1009.96	1001.8	995.132		44.5061	41.8916	46.1933	37.7292	41.3185	37.7945	37.7945	26.5557	41.0107	40.0933	31.9314	25.266		0.894899		0.724246	0.623743	0.971577	0.900722	0.645066	0.955824	0.745222	0.536308	0.573361	0.63437	0.845878		0.686509	0.58019	0.968003	0.888688	0.62405	0.948497	0.726427	0.451533	0.528789
968.918	1007.92	1007.98	1011.03	1006.95	1006.11	1008.04	1008.04	996.203	1012.68	1012.58	1002.1	995.039		39.0053	39.0626	42.1067	38.0308	37.1875	39.1223	39.1223	27.2843	43.761	43.6615	33.1793	26.121		0.865607		0.613957	0.562584	0.856638	0.878205	0.56157	0.957021	0.746155	0.532988	0.591787	0.668216	0.850168		0.561126	0.511952	0.83861	0.863443	0.53561	0.949893	0.727428	0.447606	0.549141
969.373	1011.19	1011.45	1012.78	1007.35	1005.13	1010.21	1010.21	995.937	1018.44	1008.45	1001.01	994.382		41.8179	42.0813	43.4115	37.9768	35.7583	40.837	40.837	26.5637	49.0639	39.0809	31.6348	25.0088		0.904102		0.6875	0.633012	0.922459	0.915957	0.564002	1.04339	0.813495	0.541987	0.693006	0.624711	0.84664		0.644733	0.590532	0.912708	0.905771	0.538185	1.05059	0.799736	0.458251	0.660934
969.156	1012.25	1010.97	1012.27	1005.14	1006.8	1010.57	1010.57	994.021	1014.18	1007.47	1003.63	994.529		43.0943	41.8094	43.1158	35.9876	37.6479	41.4145	41.4145	24.8653	45.0229	38.3113	34.4785	25.3735		0.891105		0.698301	0.619881	0.903006	0.855504	0.58527	1.04294	0.813141	0.500042	0.626788	0.603606	0.909483		0.657012	0.575882	0.89081	0.83799	0.560713	1.05006	0.799355	0.408637	0.587797
968.409	1009.47	1010.56	1012.81	1008.27	1006.99	1009.5	1009.5	997.719	1016.59	1012.77	1004.4	994.304		41.0661	42.1551	44.3972	39.8604	38.5846	41.0876	41.0876	29.3107	48.1835	44.3595	35.9879	25.8957		0.873138		0.652018	0.612404	0.911094	0.928461	0.587736	1.01384	0.790455	0.577553	0.657262	0.684805	0.930155		0.604395	0.567539	0.899914	0.91979	0.563325	1.01613	0.774996	0.500319	0.621455
968.398	1008.92	1008.39	1012.12	1005.29	1003.91	1008.1	1008.1	996.067	1013.81	1006.7	1005.2	993.983		40.5205	39.989	43.7264	36.8943	35.5154	39.6989	39.6989	27.6684	45.4113	38.3059	36.7998	25.5845		0.883759		0.651182	0.588004	0.908245	0.869827	0.547567	0.99149	0.77303	0.551826	0.626983	0.598546	0.962712		0.603445	0.540314	0.896707	0.85405	0.520777	0.990079	0.756286	0.469888	0.588013
968.326	1010.25	1010.73	1013.11	1007.02	1010.07	1007.97	1007.97	997.634	1018.69	1012.93	1006.14	993.699		41.9251	42.405	44.7821	38.6974	41.7402	39.649	39.649	29.3085	50.3687	44.6024	37.8104	25.3731		0.891121		0.679367	0.628723	0.937921	0.919938	0.6489	0.998493	0.77849	0.589406	0.701222	0.702737	0.99739		0.635487	0.585747	0.930115	0.910234	0.628111	0.998244	0.762149	0.514338	0.670008
969.095	1010.68	1011.26	1010.14	1006.33	1007.57	1008.66	1008.66	1000.06	1015.35	1008.84	1006.09	993.538		41.5895	42.1646	41.0475	37.2387	38.4728	39.562	39.562	30.9656	46.2552	39.7452	36.9903	24.4428		0.925037		0.699577	0.648951	0.892422	0.918952	0.620867	1.03422	0.806345	0.64643	0.668462	0.650041	1.01289		0.658463	0.608317	0.878895	0.909128	0.598418	1.0399	0.792058	0.581788	0.633826
969.097	1011.53	1011.86	1014.37	1007.36	1005.1	1010.73	1010.73	999.17	1017.19	1010.78	1005.54	993.529		42.4289	42.7635	45.2772	38.2653	36.0009	41.6331	41.6331	30.0732	48.0975	41.6794	36.4413	24.4314		0.925469		0.714031	0.658477	0.984842	0.944728	0.581248	1.08887	0.848955	0.628095	0.695412	0.681995	0.998326		0.674895	0.618945	0.982936	0.938028	0.556453	1.10361	0.837812	0.560101	0.663591
968.311	1010.48	1008.7	1011.03	1008.87	1003.7	1008.56	1008.56	998.674	1014.03	1009.1	1005.93	993.58		42.1646	40.3872	42.7138	40.5543	35.386	40.2497	40.2497	30.3623	45.7216	40.7844	37.6203	25.2685		0.89481		0.686077	0.601285	0.898306	0.968072	0.552394	1.01782	0.793556	0.613126	0.639161	0.645242	0.996484		0.643115	0.555133	0.885518	0.964202	0.52589	1.02077	0.778326	0.542395	0.601463
968.813	1008.73	1010.91	1011.95	1009.05	1005.48	1009.78	1009.78	994.666	1016.38	1007.38	1002.65	993.585		39.9154	42.0972	43.1355	40.2398	36.6662	40.9716	40.9716	25.8531	47.5669	38.5652	33.8355	24.772		0.912743		0.662494	0.639303	0.925354	0.979814	0.583849	1.05684	0.823977	0.53253	0.678283	0.62236	0.914192		0.616305	0.597552	0.915968	0.977368	0.559208	1.06626	0.810991	0.447065	0.644672
968.465	1013.09	1009.58	1011.28	1007.9	1005.49	1007.84	1007.84	996.801	1012.71	1011.25	1002.86	993.044		44.6215	41.1162	42.8116	39.4304	37.0281	39.3787	39.3787	28.3356	44.2407	42.7894	34.3987	24.5784		0.919935		0.74644	0.629326	0.925643	0.967672	0.594258	1.02375	0.798183	0.588265	0.635824	0.695971	0.936733		0.711739	0.58642	0.916293	0.963753	0.570233	1.02769	0.783294	0.512989	0.597778
967.961	1011.85	1010.22	1010.49	1007.7	1008.32	1012.69	1012.69	997.778	1009.79	1012.14	1004.73	993.169		43.8924	42.2577	42.5252	39.7344	40.3603	44.7288	44.7288	29.8169	41.831	44.1788	36.7684	25.2075		0.896974		0.715918	0.630654	0.896503	0.950794	0.631569	1.13382	0.883998	0.603568	0.586187	0.700635	0.976274		0.67704	0.587902	0.883488	0.94483	0.609754	1.15601	0.87544	0.53109	0.542955
968.567	1010.7	1009	1012.38	1006.94	1005.45	1004.31	1004.31	998.922	1009.88	1007.79	1004.85	992.937		42.1366	40.43	43.8152	38.3734	36.8794	35.745	35.745	30.355	41.3089	39.2245	36.2857	24.3701		0.927798		0.710896	0.624112	0.955439	0.94978	0.59693	0.937226	0.730722	0.635575	0.598762	0.64344	0.996565		0.671331	0.580602	0.949836	0.943693	0.573063	0.926816	0.710857	0.568949	0.556844
968.594	1008.77	1008.84	1006.12	1005.81	1006.78	1010.01	1010.01	997.227	1011.97	1009.01	1004.74	992.532		40.175	40.2484	37.5238	37.2181	38.186	41.419	41.419	28.6324	43.3724	40.4161	36.147	23.9379		0.944547		0.690038	0.632525	0.83302	0.937816	0.629237	1.1056	0.862	0.610331	0.640022	0.674956	1.01068		0.647619	0.589989	0.812023	0.930279	0.607283	1.12312	0.851819	0.539089	0.602414
968.631	1002.31	1009.18	1007.45	1005.99	1007.33	1007.07	1007.07	1002.62	1013.53	1007.66	1002.09	992.389		33.6823	40.5496	38.8163	37.3617	38.7011	38.4394	38.4394	33.9868	44.8973	39.0301	33.4603	23.7582		0.951691		0.582896	0.642078	0.868231	0.948554	0.642548	1.03383	0.80604	0.729944	0.667535	0.65674	0.942633		0.525814	0.600648	0.851661	0.942319	0.621382	1.03944	0.791731	0.680571	0.632801
969.099	1006.21	1009.61	1011.16	1005.98	1007.28	1004.91	1004.91	1001.68	1011.92	1005.73	1002.93	992.627		37.1075	40.5129	42.0602	36.8798	38.1763	35.8075	35.8075	32.5815	42.8159	36.6264	33.8303	23.5281		0.960998		0.648452	0.647771	0.94999	0.945477	0.640034	0.972462	0.758194	0.706606	0.642814	0.622321	0.962377		0.600341	0.606999	0.943701	0.938868	0.618719	0.967895	0.740356	0.652966	0.605498
968.481	1006.57	1010.75	1006.73	1005.05	1006.98	1008.65	1008.65	1000.78	1015.04	1008.28	1003.37	992.601		38.0888	42.2696	38.2486	36.5646	38.4942	40.1639	40.1639	32.2995	46.5597	39.794	34.884	24.1198		0.937424		0.649273	0.65928	0.842708	0.914402	0.629533	1.06402	0.829577	0.683308	0.681875	0.659556	0.96801		0.601275	0.619842	0.822929	0.904027	0.607597	1.07463	0.817004	0.625408	0.648639
968.784	1009.61	1008.87	1011.42	1004.61	1003.73	1007.79	1007.79	1005.2	1013.62	1010.3	1003.54	992.552		40.8237	40.0869	42.6336	35.8216	34.9501	39.0023	39.0023	36.4151	44.8406	41.5116	34.7538	23.768		0.9513		0.706193	0.634491	0.953223	0.90908	0.580032	1.04854	0.817507	0.781776	0.666418	0.698207	0.97867		0.665984	0.592182	0.947341	0.89806	0.555165	1.05659	0.804044	0.741879	0.631567
968.337	1013.58	1009.08	1007.49	1005.23	1004.63	1009.38	1009.38	1001.72	1014.69	1003.9	1001.35	992.483		45.2396	40.7415	39.1567	36.8894	36.2974	41.0456	41.0456	33.3825	46.3534	35.5586	33.0088	24.1456		0.936424		0.770345	0.634769	0.861796	0.921541	0.592973	1.08621	0.846883	0.705465	0.678129	0.588729	0.914997		0.738916	0.592492	0.844417	0.912031	0.568872	1.10051	0.835588	0.651617	0.644503
968.323	1012.77	1008.3	1007.36	1003.41	1007.48	1008.68	1008.68	1001.13	1016	1006.71	1002.4	992.24		44.4479	39.9734	39.036	35.0902	39.155	40.3592	40.3592	32.8064	47.6725	38.3842	34.0795	23.9172		0.945364		0.764089	0.628747	0.867341	0.884962	0.645763	1.07825	0.84067	0.699909	0.704085	0.641578	0.953694		0.731804	0.585773	0.850659	0.871019	0.624787	1.09122	0.828916	0.645044	0.67317
969.179	1011.63	1004.95	1007.06	1004.69	1004.87	1009.52	1009.52	1000.52	1013.92	1008.8	999.765	992.37		42.4533	35.7741	37.877	35.5127	35.6916	40.3434	40.3434	31.3455	44.7388	39.6195	30.5858	23.191		0.97497		0.752655	0.580316	0.867943	0.923664	0.607076	1.11158	0.866657	0.689683	0.681448	0.682963	0.882729		0.718804	0.531737	0.851337	0.914412	0.58381	1.13008	0.85682	0.632949	0.648168
968.212	1016.37	1006.2	1007.78	1002.42	1008.31	1008.31	1008.31	1001.67	1013.7	1009.42	999.179	992.185		48.1532	37.9848	39.5662	34.205	40.0945	40.0977	40.0977	33.4534	45.4896	41.2115	30.9666	23.9727		0.943177		0.82587	0.596085	0.877086	0.860642	0.659727	1.06878	0.83329	0.712061	0.67029	0.687241	0.864576		0.80204	0.549331	0.86163	0.84375	0.639578	1.08019	0.820992	0.659418	0.635845
968.875	1015.8	1004.33	1003.43	1005.03	1009.32	1009.23	1009.23	1000.26	1013.18	1008.44	1001.16	991.593		46.9295	35.4569	34.5523	36.1574	40.4497	40.353	40.353	31.3887	44.3012	39.5638	32.2841	22.7187		0.995238		0.849311	0.587129	0.80822	0.959985	0.70231	1.13496	0.884886	0.704993	0.688812	0.696182	0.951115		0.828689	0.539339	0.784104	0.955135	0.684684	1.15734	0.876394	0.651058	0.656301
968.007	1011.55	1005.9	1006.43	1003.46	1004.79	1006.2	1006.2	1004.26	1008.09	1007.47	999.806	991.401		43.5422	37.8888	38.4263	35.454	36.7817	38.1971	38.1971	36.2536	40.0825	39.4623	31.7991	23.3947		0.966479		0.765238	0.609269	0.872863	0.914108	0.62017	1.04328	0.813405	0.790729	0.605209	0.67433	0.909755		0.73311	0.564041	0.856876	0.903698	0.597679	1.05045	0.79964	0.752468	0.563964
967.822	1010	1004.37	1000.18	1002.63	1007.1	1009.53	1009.53	1005.7	1010.96	1007.75	1000.08	991.33		42.1803	36.5454	32.3613	34.8088	39.2802	41.7114	41.7114	37.8824	43.137	39.9259	32.2567	23.5081		0.961819		0.737729	0.584833	0.731552	0.893147	0.659104	1.13377	0.88396	0.822271	0.648189	0.678963	0.918398		0.701837	0.536777	0.697795	0.880195	0.638919	1.15595	0.8754	0.789778	0.611434
968.259	1010.72	1001.92	1004.29	1001.12	1009.28	1005.47	1005.47	997.424	1008.03	1009.11	999.933	991.13		42.4649	33.6566	36.028	32.8651	41.02	37.2087	37.2087	29.1649	39.7713	40.853	31.6738	22.8718		0.988577		0.763369	0.553588	0.837098	0.866734	0.707445	1.03952	0.810475	0.650662	0.61424	0.714056	0.926889		0.730985	0.501915	0.816613	0.850581	0.690122	1.04607	0.796493	0.586793	0.573939
967.735	1012.87	1004.94	1002.77	1000.75	1006.35	1009.85	1009.85	997.279	1007.74	1005.48	1000.39	990.785		45.133	37.2097	35.0346	33.0121	38.6107	42.1118	42.1118	29.5438	40.0036	37.748	32.6563	23.0498		0.980941		0.805064	0.607301	0.807728	0.863884	0.660749	1.16741	0.910187	0.654023	0.613055	0.654688	0.948258		0.778386	0.561846	0.78355	0.847386	0.640662	1.19517	0.903561	0.590769	0.57263
967.575	1015.23	1004.87	1001.94	1001.14	1007.81	1008.24	1008.24	997.528	1005.9	1008.88	1000.53	990.846		47.6576	37.2985	34.3648	33.5684	40.2332	40.6622	40.6622	29.9533	38.3297	41.3045	32.9529	23.2709		0.971622		0.842021	0.602968	0.784759	0.870097	0.681975	1.11651	0.870507	0.656789	0.581823	0.709565	0.94778		0.820401	0.557011	0.757693	0.854352	0.663144	1.13584	0.860954	0.594041	0.538135
968.19	1013.98	1005.8	1000.34	1003.84	1010.55	1002.52	1002.52	998.562	1007.87	1008.04	999.269	991.038		45.7895	37.6115	32.1467	35.6489	42.3564	34.3288	34.3288	30.3718	39.6821	39.8466	31.0788	22.8473		0.989636		0.824015	0.619301	0.747715	0.941154	0.731274	0.960085	0.748544	0.678313	0.613519	0.697212	0.910449		0.799931	0.575235	0.715991	0.934021	0.715362	0.953465	0.729993	0.619501	0.573143
967.182	1015.12	1004.72	1002.45	999.998	1007.97	1007.6	1007.6	998.501	1007.66	1008.12	998.42	990.942		47.9328	37.5333	35.2694	32.816	40.7846	40.4152	40.4152	31.3185	40.4826	40.9415	31.2376	23.7595		0.95164		0.829466	0.594285	0.788852	0.833101	0.677103	1.08691	0.847425	0.6726	0.601864	0.688864	0.879968		0.806128	0.547322	0.762301	0.812872	0.657984	1.10132	0.836169	0.612743	0.56027
967.958	1014.27	1005.05	1000.51	1000.9	1006.35	1006.95	1006.95	997.301	1012.04	1010.49	999.547	990.499		46.3072	37.0911	32.5555	32.9433	38.3918	38.9959	38.9959	29.3432	44.081	42.5368	31.5889	22.5412		1.00307		0.844647	0.619025	0.767507	0.881536	0.671828	1.10542	0.861858	0.664239	0.690784	0.754389	0.93796		0.823386	0.574926	0.738272	0.867177	0.652396	1.12291	0.851667	0.602853	0.658479
968.398	1014.07	1005.6	1001.62	999.789	1008.73	1006.67	1006.67	999.363	1008.68	1013.4	1000.59	990.539		45.6735	37.2006	33.2239	31.3914	40.3321	38.2691	38.2691	30.9654	40.2848	45.0063	32.188	22.1408		1.02121		0.848154	0.632081	0.797431	0.8552	0.718546	1.10444	0.861092	0.713637	0.642711	0.812621	0.973034		0.827374	0.589493	0.771958	0.837649	0.70188	1.12176	0.850844	0.661283	0.605385
968.307	1015.94	1004.69	1000.95	999.9	1007.66	1005.29	1005.29	1001.63	1009.26	1011.13	1001	990.789		47.6362	36.379	32.6382	31.5927	39.3569	36.986	36.986	33.3234	40.9525	42.8206	32.6904	22.4822		1.00571		0.871169	0.608734	0.771477	0.847614	0.690524	1.0512	0.819583	0.756318	0.643442	0.761416	0.973214		0.853538	0.563445	0.742741	0.829144	0.672199	1.05969	0.806273	0.711767	0.606192
967.618	1013.62	1007.38	999.424	1000.75	1010.72	1004.39	1004.39	997.378	1007.2	1014.99	1001.67	990.5		46.0039	39.7666	31.8063	33.1312	43.1008	36.776	36.776	29.7597	39.5774	47.3693	34.0522	22.8815		0.988155		0.826634	0.653806	0.738692	0.873378	0.743014	1.02699	0.800707	0.663648	0.610985	0.827599	0.996064		0.802909	0.613734	0.705833	0.858031	0.727797	1.03147	0.786005	0.602154	0.570343
967.685	1013.57	1004.89	1000.73	1000.38	1014.33	1003.51	1003.51	1001.7	1008.02	1013.06	1002.36	990.311		45.8855	37.2023	33.0446	32.6913	46.6399	35.8264	35.8264	34.0193	40.33	45.3786	34.6774	22.6255		0.999337		0.833838	0.618568	0.776137	0.871535	0.813123	1.01179	0.78886	0.767223	0.629649	0.801791	1.02583		0.811098	0.574417	0.747986	0.855964	0.802058	1.01375	0.773283	0.724665	0.590958
967.698	1015.04	1008.83	1000.99	1000.84	1009.24	1004.91	1004.91	1003.13	1008.07	1010.49	998.658	989.964		47.3368	41.1313	33.292	33.1396	41.5448	37.2093	37.2093	35.4333	40.3726	42.792	30.9593	22.2659		1.01548		0.874102	0.69494	0.794575	0.897753	0.735991	1.06782	0.83254	0.812017	0.640493	0.768298	0.930631		0.856872	0.659629	0.768743	0.88536	0.720359	1.07907	0.820186	0.777649	0.602934
[truncated: 2 more columns]

## Sheet: LZ-wt1
background	WT-LZ_n1	WT-LZ_n2	WT-LZ_n3	WT-LZ_n4	WT-LZ_n5	WT-LZ_n6	WT-LZ_n7	WT-LZ_n8	WT-LZ_n9	WT-LZ_n10	unfrapped nuclei		WT-LZ_n1	WT-LZ_n2	WT-LZ_n3	WT-LZ_n4	WT-LZ_n5	WT-LZ_n6	WT-LZ_n7	WT-LZ_n8	WT-LZ_n9	WT-LZ_n10	unfrapped nuclei		ROI2		WT-LZ_n1	WT-LZ_n2	WT-LZ_n3	WT-LZ_n4	WT-LZ_n5	WT-LZ_n6	WT-LZ_n7	WT-LZ_n8	WT-LZ_n9	WT-LZ_n10		WT-LZ_n1	WT-LZ_n2	WT-LZ_n3	WT-LZ_n4	WT-LZ_n5	WT-LZ_n6	WT-LZ_n7	WT-LZ_n8	WT-LZ_n9	WT-LZ_n10
964.796	1016.5	1026.67	1012.59	1023.92	997.646	1027.83	999.055	1012.86	1022.32	1011.9	1008.42		51.7043	61.8709	47.7937	59.1252	32.8505	63.0323	34.2596	48.0637	57.5273	47.1038	43.6292		1.00481		1.00595	0.944567	1.01105	0.977783	1.02923	0.990897	1.00641	1.03232	1.07594	0.998153		1.00781	0.925906	1.01477	0.973487	1.04395	0.989272	1.00965	1.04118	1.10804	0.997754
964.471	1016.06	1034.23	1011.67	1026.86	995.763	1029.27	998.621	1009.97	1014.39	1012.2	1008.52		51.5873	69.7633	47.2037	62.394	31.2918	64.8026	34.1508	45.5021	49.9216	47.7323	44.0491		0.995233		0.994106	1.0549	0.989053	1.022	0.971049	1.00902	0.993651	0.967987	0.924787	1.00183		0.992263	1.07339	0.985369	1.02626	0.956468	1.01063	0.99044	0.959212	0.892986	1.00222
964.803	977.33	981.68	976.977	974.829	975.74	974.663	976.499	975.05	981.058	973.379	1009.44		12.5272	16.8775	12.1746	10.0259	10.9373	9.86028	11.6962	10.2475	16.2551	8.57558	44.6356		0.982155		0.238231	0.251854	0.25174	0.162064	0.334946	0.151513	0.33584	0.215135	0.297165	0.177623		0	0	0	0	0	0	0	0	0	0
964.608	982.558	983.831	975.788	983.285	980.852	976.801	975.49	978.249	980.742	972.819	1009.25		17.9498	19.2234	11.1798	18.6767	16.2445	12.1931	10.8816	13.6411	16.1336	8.21057	44.6376		0.982111		0.341338	0.286848	0.23116	0.301888	0.497453	0.18735	0.312435	0.286366	0.29493	0.170055		0.135352	0.0467737	-0.0275047	0.166866	0.244351	0.0422366	-0.0352393	0.0907566	-0.00317957	-0.00920264
963.018	985.992	985.039	981.131	980.522	982.031	977.725	976.939	981.54	984.026	976.562	1008.3		22.9739	22.0208	18.1129	17.5035	19.0126	14.7069	13.921	18.5221	21.0073	13.5432	45.2809		0.96816		0.430672	0.323923	0.369193	0.278905	0.57395	0.222766	0.394026	0.38331	0.378569	0.276519		0.252624	0.0963293	0.156967	0.139439	0.359375	0.0839762	0.0876088	0.214273	0.115823	0.120255
963.23	988.205	985.189	977.978	980.055	984.79	977.691	979.195	982.113	984.489	975.589	1007.5		24.9744	21.9585	14.748	16.8251	21.5594	14.4605	15.9643	18.8824	21.2584	12.3591	44.2649		0.99038		0.478919	0.33042	0.307506	0.274249	0.66577	0.224061	0.462232	0.399735	0.391887	0.258134		0.315959	0.105014	0.0745273	0.133882	0.497439	0.0855026	0.190304	0.2352	0.134771	0.0979001
963.491	991.645	986.073	981.455	983.525	983.53	976.258	979.18	983.659	990.652	979.471	1007.14		28.1542	22.5827	17.9644	20.0341	20.0395	12.7671	15.6889	20.1677	27.1616	15.9807	43.6531		1.00426		0.547463	0.344575	0.37982	0.331132	0.627508	0.200595	0.460625	0.432928	0.507727	0.338454		0.405939	0.123934	0.17117	0.201767	0.439907	0.0578463	0.187884	0.277492	0.299589	0.195568
962.726	994.107	987.984	981.692	983.841	981.602	976.787	979.297	984.145	986.304	978.537	1006.89		31.3814	25.2581	18.9657	21.1153	18.8763	14.0605	16.5711	21.4187	23.5782	15.8108	44.1627		0.992674		0.603176	0.380951	0.396364	0.344977	0.584265	0.218368	0.480913	0.454478	0.435658	0.330992		0.479076	0.172556	0.193281	0.218289	0.374885	0.0787931	0.218431	0.304949	0.19705	0.186495
963.085	997.115	987.726	984.755	983.74	984.672	978.019	979.827	982.589	985.13	983.135	1007.1		34.0302	24.6405	21.6698	20.6544	21.5867	14.9333	16.7418	19.5042	22.0443	20.0499	44.012		0.996073		0.656327	0.372908	0.454427	0.338601	0.670444	0.232717	0.48753	0.415271	0.40871	0.421172		0.548849	0.161805	0.270878	0.210681	0.504468	0.0957038	0.228393	0.254995	0.158707	0.296152
962.508	995.201	987.479	983.709	982.622	981.094	977.303	980.241	986.365	992.13	981.759	1006.6		32.6925	24.971	21.2003	20.1137	18.5852	14.7951	17.7325	23.8571	29.6211	19.2503	44.0956		0.994184		0.629333	0.377194	0.443739	0.329113	0.57613	0.230126	0.515401	0.506988	0.548146	0.40361		0.513413	0.167534	0.256594	0.199357	0.362653	0.0926512	0.270359	0.371852	0.357099	0.274797
962.956	995.18	986.303	984.102	983.736	982.227	975.204	980.444	987.008	992.067	981.852	1006.41		32.2245	23.3471	21.1462	20.7807	19.2713	12.248	17.488	24.052	29.1118	18.8961	43.4497		1.00896		0.629544	0.357906	0.449185	0.34508	0.606277	0.193339	0.515849	0.518727	0.546728	0.402071		0.513689	0.141753	0.263872	0.218412	0.407983	0.0492949	0.271032	0.386808	0.355081	0.272926
962.559	999.519	987.284	978.177	981.885	982.649	973.226	980.662	989.59	993.388	986.008	1005.95		36.9606	24.7258	15.6185	19.3263	20.0908	10.6668	18.1029	27.0312	30.8295	23.4495	43.3944		1.01025		0.722989	0.379524	0.332189	0.321338	0.632864	0.168594	0.534667	0.583722	0.579725	0.499595		0.636359	0.170649	0.107515	0.190078	0.447961	0.020131	0.299367	0.469619	0.40203	0.391513
962.289	993.585	989.587	979.186	982.265	983.19	976.957	980.686	988.855	993.352	983.563	1005.96		31.2958	27.2985	16.8975	19.9761	20.9012	14.6684	18.3973	26.5661	31.0628	21.2744	43.675		1.00376		0.608248	0.416322	0.357084	0.330009	0.654164	0.230353	0.539873	0.569994	0.580361	0.450343		0.485734	0.219834	0.140786	0.200426	0.479988	0.092918	0.307205	0.452128	0.402934	0.331624
962.182	994.091	990.908	979.747	981.416	982.185	974.675	979.906	989.136	994.246	987.74	1004.95		31.9095	28.7264	17.5652	19.2343	20.0028	12.4929	17.7237	26.9539	32.0643	25.5582	42.7715		1.02496		0.633275	0.447353	0.379035	0.324466	0.63927	0.200333	0.531093	0.59053	0.611727	0.552452		0.518588	0.261311	0.170121	0.193812	0.457593	0.0575377	0.293985	0.478293	0.447561	0.455787
962.8	998.79	991.077	980.982	983.546	980.277	975.302	981.682	990.959	1001.04	989.969	1005.29		35.9894	28.2763	18.1814	20.7458	17.4765	12.5013	18.8817	28.159	38.2431	27.1688	42.4876		1.03181		0.719019	0.443286	0.394954	0.352303	0.562265	0.201807	0.569574	0.621056	0.734483	0.59119		0.631146	0.255876	0.191396	0.227032	0.341805	0.0592752	0.351924	0.517186	0.62222	0.502893
962.187	991.812	992.267	979.588	981.713	982.56	975.718	980.538	988.286	994.646	987.331	1004.4		29.6253	30.0802	17.4013	19.5266	20.3731	13.5308	18.3514	26.0993	32.4596	25.1443	42.2145		1.03848		0.595699	0.474615	0.380451	0.333742	0.659693	0.219838	0.557155	0.57935	0.627438	0.550675		0.469261	0.29775	0.172014	0.204882	0.488301	0.0805257	0.333226	0.464048	0.469915	0.453626
962.301	992.596	994.299	988.305	984.261	984.255	979.938	980.897	991.24	995.481	987.471	1005.57		30.2953	31.9981	26.004	21.96	21.9546	17.6375	18.5961	28.9392	33.1807	25.1707	43.2693		1.01317		0.594323	0.49257	0.554677	0.366184	0.693575	0.279576	0.550823	0.626731	0.625743	0.537816		0.467454	0.321749	0.404856	0.243598	0.539247	0.150931	0.323691	0.524417	0.467503	0.43799
962.685	993.641	993.714	976.581	980.332	979.879	974.577	982.188	992.119	996.72	983.721	1003.2		30.956	31.029	13.896	17.6461	17.1938	11.8916	19.5031	29.4337	34.0346	21.0353	40.5147		1.08205		0.648574	0.510127	0.316562	0.314256	0.580106	0.201313	0.616966	0.680781	0.685486	0.480015		0.538671	0.345218	0.0866298	0.181627	0.368632	0.0586924	0.423281	0.593282	0.552506	0.367705
962.263	992.482	997.406	973.947	981.62	981.941	979.651	980.086	991.756	994.332	989.03	1004.58		30.2193	35.1439	11.6844	19.3578	19.6786	17.3889	17.8239	29.4932	32.0698	26.7678	42.3167		1.03598		0.606177	0.553173	0.254844	0.330058	0.635667	0.28184	0.539834	0.653107	0.618407	0.584815		0.483015	0.402754	0.00414794	0.200486	0.452175	0.153599	0.307146	0.558023	0.457066	0.495141
962.227	995.276	999.942	981.362	981.142	984.16	977.536	978.587	991.67	997.089	987.299	1004.82		33.0484	37.714	19.1347	18.9145	21.9324	15.3086	16.3594	29.4428	34.8616	25.0719	42.5889		1.02935		0.65869	0.589833	0.414673	0.320439	0.703943	0.246537	0.492313	0.647825	0.667945	0.544263		0.55195	0.451756	0.217749	0.189006	0.554837	0.111992	0.235595	0.551292	0.527549	0.44583
961.597	992.919	1000.88	977.768	981.673	984.005	977.225	981.613	990.073	998.179	988.636	1004.68		31.3223	39.2875	16.1712	20.0769	22.4084	15.6285	20.016	28.4762	36.5822	27.0393	43.0806		1.01761		0.617162	0.60743	0.346451	0.33625	0.711012	0.248816	0.595478	0.619406	0.692912	0.580273		0.497435	0.475275	0.126574	0.207875	0.565467	0.114678	0.390927	0.515084	0.563073	0.489617
962.157	996.705	1004.59	974.35	979.253	982.431	974.325	984.048	993.09	1001.83	989.468	1004.29		34.5474	42.4349	12.1925	17.0958	20.2737	12.1673	21.8903	30.9324	39.6683	27.3106	42.1277		1.04062		0.696104	0.670932	0.267119	0.292798	0.657828	0.198093	0.665968	0.688051	0.768361	0.599351		0.601065	0.560155	0.020553	0.156019	0.485497	0.0548975	0.497061	0.602544	0.670422	0.512816
962.431	991.045	999.731	976.822	982.232	986.525	975.908	982.107	993.889	1002.19	985.268	1004.52		28.6139	37.3006	14.3913	19.801	24.0941	13.4776	19.6763	31.4586	39.7558	22.8374	42.0894		1.04157		0.577074	0.590291	0.315579	0.339439	0.782502	0.219625	0.599157	0.700392	0.770757	0.50164		0.44481	0.452368	0.0853159	0.21168	0.672962	0.080275	0.396466	0.618269	0.673831	0.394
962.155	991.204	996.005	979.455	981.9	982.438	975.246	979.939	990.57	998.808	985.306	1004.37		29.0494	33.8496	17.3	19.7449	20.2831	13.0907	17.7845	28.4153	36.6528	23.1515	42.2109		1.03857		0.58417	0.534136	0.378269	0.337502	0.656835	0.212706	0.539991	0.630815	0.708552	0.507075		0.454125	0.377308	0.169098	0.209369	0.484005	0.0721202	0.307382	0.52962	0.585326	0.400609
961.818	991.681	998.682	985.028	986.019	986.116	978.092	984.502	991.16	996.302	987.05	1004.73		29.8633	36.8642	23.2105	24.2013	24.2977	16.2738	22.6844	29.3417	34.4836	25.2321	42.9105		1.02164		0.590748	0.572223	0.499232	0.406933	0.774016	0.260117	0.677539	0.640763	0.655752	0.543637		0.46276	0.428217	0.330756	0.292228	0.660202	0.127997	0.514483	0.542294	0.510201	0.445068
961.633	999.927	997.414	981.456	990.806	984.98	978.286	983.305	994.341	1004.56	986.084	1004.88		38.2938	35.7815	19.8233	29.1727	23.3476	16.6536	21.6721	32.7078	42.9286	24.4512	43.2485		1.01366		0.751595	0.551074	0.423043	0.486689	0.737935	0.264106	0.642243	0.708687	0.809963	0.522693		0.67391	0.399949	0.228935	0.38741	0.605949	0.132699	0.461339	0.628837	0.729613	0.419601
961.323	995.101	1003.1	977.201	987.034	984.526	977.301	985.973	990.924	999.961	983.503	1004.23		33.7775	41.7763	15.8783	25.7111	23.2031	15.9778	24.6503	29.6005	38.638	22.1801	42.9073		1.02172		0.668226	0.648518	0.341549	0.432351	0.739201	0.255405	0.73631	0.646462	0.734807	0.477915		0.564469	0.530195	0.120024	0.322563	0.607852	0.122443	0.602973	0.549555	0.622681	0.365151
961.648	991.358	997.358	976.111	982.921	981.325	975.688	985.457	990.566	999.941	988.037	1003.4		29.7099	35.7096	14.4623	21.2728	19.6762	14.0391	23.8084	28.9172	38.2926	26.3888	41.7562		1.04988		0.603959	0.569623	0.319667	0.36758	0.644123	0.230601	0.730768	0.648949	0.748315	0.584275		0.480104	0.424742	0.0907795	0.245264	0.464889	0.0932109	0.594629	0.552725	0.6419	0.494484
961.755	992.18	998.619	979.975	983.692	984.266	979.31	985.769	991.199	999.666	984.09	1005.3		30.425	36.8639	18.2193	21.9366	22.5109	17.555	24.0141	29.4435	37.9108	22.3346	43.5428		1.00681		0.593118	0.563907	0.386185	0.363496	0.706681	0.27652	0.706837	0.633647	0.710454	0.47422		0.465871	0.417102	0.179676	0.24039	0.558954	0.147329	0.558596	0.533228	0.588032	0.360657
961.363	988.181	999.654	979.966	986.585	983.692	978.666	983.35	990.998	999.742	985.717	1005.11		26.8179	38.2909	18.603	25.2223	22.3289	17.3034	21.9873	29.6353	38.3797	24.3541	43.7446		1.00216		0.520388	0.583035	0.3925	0.416014	0.697736	0.2713	0.644196	0.634834	0.715925	0.514715		0.370398	0.442669	0.188116	0.303065	0.545504	0.141178	0.46428	0.53474	0.595815	0.409899
962.08	993.484	1006.5	979.964	988.177	983.018	982.398	987.812	991.645	999.359	988.95	1004.99		31.4045	44.4177	17.8839	26.0975	20.938	20.3186	25.7322	29.5652	37.2796	26.8701	42.9088		1.02168		0.621259	0.689498	0.384677	0.438834	0.667017	0.324781	0.7686	0.645668	0.708949	0.57895		0.502814	0.584971	0.177662	0.330299	0.499314	0.204208	0.651591	0.548545	0.58589	0.488009
961.838	991.303	1008.65	983.575	987.763	983.979	979.682	983.605	993.022	1002.62	987.489	1005.1		29.4642	46.8111	21.7367	25.925	22.1404	17.8439	21.7668	31.1833	40.7796	25.6505	43.2625		1.01333		0.578109	0.72071	0.463726	0.432368	0.699554	0.282892	0.644841	0.675437	0.769168	0.548154		0.446169	0.62669	0.283306	0.322583	0.548237	0.154839	0.465251	0.586474	0.67157	0.45056
961.072	991.869	997.95	982.126	990.833	987.145	978.596	984.678	994.915	1005.38	987.181	1005.02		30.7969	36.8778	21.0536	29.7605	26.0729	17.5239	23.6051	33.8425	44.3125	26.1083	43.9524		0.997423		0.594773	0.558863	0.442104	0.488545	0.810876	0.273458	0.688325	0.721531	0.822685	0.54918		0.468045	0.41036	0.254408	0.389625	0.715626	0.143721	0.530723	0.645201	0.747715	0.451808
961.522	993.769	1008.47	973.251	985.479	986.303	974.412	984.268	993.289	1000.48	987.257	1004.83		32.2475	46.9487	11.7293	23.9568	24.7815	12.8896	22.7455	31.767	38.9596	25.7354	43.3071		1.01229		0.632069	0.722085	0.249974	0.399133	0.782198	0.204138	0.673143	0.687373	0.734084	0.549403		0.517004	0.628528	-0.00236063	0.28292	0.672505	0.0620222	0.507863	0.601681	0.621653	0.452079
961.727	992.96	1000.67	982.494	988.647	984.463	978.732	985.995	990.292	998.759	987.706	1005.34		31.2323	38.9403	20.7664	26.9192	22.7351	17.0047	24.2676	28.5647	37.0315	25.9783	43.6135		1.00517		0.60787	0.594706	0.439462	0.445337	0.712564	0.267418	0.713143	0.61374	0.692853	0.550692		0.485237	0.458268	0.250878	0.33806	0.567801	0.136602	0.56809	0.507864	0.562988	0.453647
962.478	990.617	999.663	981.494	988.85	986.452	982.031	982.225	993.987	1001.65	987.355	1005.26		28.1388	37.1855	19.0158	26.3724	23.9738	19.5528	19.7467	31.5086	39.1732	24.877	42.7806		1.02474		0.558323	0.578962	0.41025	0.444785	0.766015	0.313476	0.591586	0.690171	0.747192	0.537613		0.420196	0.437224	0.211837	0.337401	0.648172	0.190885	0.385067	0.605246	0.640302	0.437743
961.547	993.314	999.785	983.62	988.049	988.919	980.116	982.37	993.011	1002.33	986.056	1005.19		31.767	38.2385	22.0737	26.5027	27.3727	18.5697	20.8231	31.4638	40.7835	24.5093	43.6404		1.00455		0.617894	0.583626	0.466838	0.438177	0.857385	0.291849	0.611541	0.675613	0.762582	0.51923		0.498396	0.443459	0.287463	0.329515	0.785558	0.165395	0.415112	0.586697	0.662199	0.415389
962.104	993.783	998.488	981.586	989.964	986.943	980.799	983.723	993.825	1001.94	983.193	1005.17		31.6796	36.3846	19.4821	27.8598	24.8393	18.6953	21.6192	31.7211	39.8402	21.0897	43.0678		1.01791		0.624388	0.562715	0.417507	0.466738	0.788378	0.29773	0.643365	0.690193	0.754847	0.452727		0.506921	0.415508	0.221537	0.3636	0.681798	0.172327	0.463029	0.605274	0.651194	0.334523
962.017	996.698	999.245	982.153	990.707	987.95	982.122	983.9	996.456	1005.58	985.741	1005.06		34.6816	37.2277	20.1359	28.6907	25.9329	20.1051	21.8836	34.4396	43.5611	23.7242	43.047		1.0184		0.683886	0.576031	0.431727	0.480889	0.823483	0.320335	0.651546	0.749703	0.825744	0.509526		0.585027	0.433307	0.240541	0.380488	0.734583	0.198969	0.475346	0.681096	0.752067	0.403589
961.993	987.394	1003.56	983.747	990.399	986.576	986.44	984.087	991.524	999.983	985.588	1005.17		25.4013	41.5677	21.7542	28.4058	24.5836	24.4475	22.0942	29.5307	37.9899	23.5957	43.1802		1.01526		0.499342	0.641202	0.464985	0.474646	0.778231	0.388322	0.655788	0.640861	0.717916	0.505204		0.34277	0.520417	0.284988	0.373037	0.66654	0.279096	0.481734	0.54242	0.598649	0.398334
961.602	993.556	1013.1	986.086	988.544	985.351	980.073	987.996	990.967	999.671	984.326	1005.08		31.954	51.4993	24.4843	26.9425	23.7492	18.4711	26.3942	29.3649	38.0693	22.7242	43.4784		1.0083		0.623848	0.788952	0.51975	0.447107	0.746661	0.291382	0.778046	0.632892	0.71448	0.483208		0.506212	0.717906	0.358178	0.340173	0.619069	0.164845	0.665812	0.532267	0.59376	0.371587
962.175	989.17	1005.01	984.765	991.367	986.11	983.826	983.426	994.905	1003.48	982.648	1005.16		26.9952	42.8389	22.5894	29.1916	23.9344	21.6507	21.251	32.7303	41.3022	20.4729	42.9842		1.01989		0.533096	0.663824	0.485039	0.490001	0.761135	0.345467	0.633638	0.713537	0.78407	0.440341		0.387079	0.550654	0.311789	0.391362	0.640834	0.228588	0.448383	0.635016	0.692772	0.319462
961.62	990.819	1015.24	986.863	994.226	986.117	985.459	983.037	993.943	1000.89	980.659	1004.54		29.199	53.6175	25.2425	32.6054	24.4966	23.8392	21.4166	32.3225	39.2676	19.0386	42.9229		1.02135		0.577438	0.832032	0.542779	0.548084	0.780123	0.380929	0.639485	0.705651	0.746508	0.410075		0.445288	0.775488	0.388954	0.460679	0.669385	0.270383	0.457187	0.624969	0.63933	0.282658
962.057	992.245	1004.02	986.595	993.503	989.195	984.558	981.69	992.826	1001.61	983.457	1004.64		30.1877	41.9654	24.5382	31.4461	27.1377	22.5006	19.6333	30.7684	39.5479	21.3994	42.5861		1.02942		0.601713	0.656367	0.531809	0.532778	0.87107	0.362384	0.590875	0.677036	0.757784	0.464571		0.477155	0.540687	0.374293	0.442413	0.806135	0.248526	0.383997	0.588511	0.655373	0.348925
961.609	993.545	1008.66	985.353	991.533	990.801	982.952	983.328	994.77	1003.64	978.683	1004.96		31.9362	47.0542	23.7445	29.9243	29.1928	21.344	21.7199	33.1616	42.0363	17.0747	43.3546		1.01118		0.62528	0.722913	0.505484	0.498007	0.920423	0.337662	0.642084	0.716761	0.791187	0.364112		0.508092	0.629635	0.339112	0.400917	0.880345	0.21939	0.4611	0.639125	0.702898	0.226768
961.728	992.603	1009.25	989.959	991.799	991.416	985.849	985.517	995.697	1005.04	984.875	1004.36		30.8752	47.5226	28.2308	30.071	29.688	24.1209	23.7894	33.9689	43.3087	23.1467	42.6293		1.02838		0.614793	0.742533	0.611217	0.508964	0.951964	0.388086	0.71523	0.746704	0.829005	0.501995		0.494326	0.655859	0.480418	0.413993	0.927772	0.278818	0.571233	0.677275	0.756707	0.394432
961.722	989.744	1012.11	991.741	994.526	990.73	982.701	986.445	997.851	1005.65	983.856	1005.26		28.0215	50.3894	30.0183	32.8039	29.0078	20.9786	24.7223	36.1286	43.9272	22.1338	43.539		1.00689		0.546311	0.770875	0.636339	0.543619	0.910719	0.330477	0.727747	0.777585	0.823276	0.469998		0.404427	0.693743	0.51399	0.45535	0.865753	0.210921	0.59008	0.71662	0.748555	0.355524
962.613	992.208	1014.6	987.573	996.003	992.71	985.362	986.65	997.052	1003.98	987.196	1004.64		29.5956	51.9886	24.9607	33.3904	30.0976	22.7495	24.037	34.4389	41.3638	24.5837	42.0302		1.04304		0.597712	0.82389	0.548119	0.573201	0.978852	0.371238	0.732973	0.767825	0.803061	0.540758		0.471903	0.764605	0.396091	0.490654	0.968202	0.258961	0.597948	0.704185	0.719793	0.441568
961.711	988.415	1015.87	991.008	996.006	993.15	981.888	986.747	995.442	1004.45	987.381	1004.82		26.7038	54.163	29.2976	34.2957	31.4393	20.1771	25.0362	33.7314	42.738	25.6705	43.1106		1.0169		0.525795	0.836839	0.627231	0.573987	0.996863	0.321008	0.744309	0.733203	0.808946	0.550513		0.377495	0.781913	0.501819	0.491592	0.995283	0.199762	0.615016	0.660073	0.728167	0.453429
962.286	991.405	1016.62	987.031	995.138	990.816	985.672	986.546	996.831	1005.47	981.497	1004.41		29.1188	54.3383	24.7448	32.8517	28.5301	23.3858	24.2604	34.5447	43.1825	19.2109	42.1266		1.04065		0.586736	0.859156	0.542134	0.562662	0.925749	0.380748	0.738092	0.76842	0.836451	0.421607		0.457495	0.811742	0.388092	0.478077	0.888354	0.270169	0.605655	0.704943	0.767301	0.296682
961.876	991.462	1011.91	988.259	995.864	988.126	984.308	984.821	995.342	1003	985.779	1004.4		29.5864	50.0328	26.383	33.988	26.2507	22.4322	22.9449	33.4668	41.1229	23.9036	42.5293		1.0308		0.590515	0.783591	0.572553	0.576613	0.843723	0.361764	0.691461	0.737396	0.789015	0.519629		0.462454	0.71074	0.428746	0.494726	0.765016	0.247796	0.535444	0.665415	0.699809	0.415874
962.424	989.999	1011.54	989.318	997.275	991.183	986.738	984.06	996.038	1004.31	984.862	1004.73		27.5756	49.1171	26.8945	34.8512	28.7597	24.3148	21.6366	33.6149	41.883	22.4389	42.3087		1.03617		0.553253	0.773261	0.586697	0.59434	0.929184	0.39417	0.655433	0.744521	0.807789	0.490331		0.413539	0.696932	0.447647	0.515881	0.893519	0.285987	0.4812	0.674493	0.726521	0.380249
962.139	988.921	1003.09	989.943	998.928	991.645	984.886	984.249	997.394	1005.79	987.876	1004.26		26.7827	40.9515	27.8043	36.7896	29.506	22.7473	22.1103	35.2559	43.6528	25.7371	42.124		1.04072		0.539699	0.647536	0.609204	0.630148	0.957477	0.370376	0.672721	0.784291	0.845615	0.56487		0.395748	0.528883	0.477727	0.558615	0.936061	0.257945	0.507229	0.725164	0.78034	0.470887
962.396	995.856	1010.09	993.294	1001.03	986.564	985.097	985.39	997.571	1005.5	983.308	1004.2		33.4594	47.6944	30.8979	38.6355	24.1673	22.7003	22.9933	35.1748	43.1083	20.9119	41.8029		1.04871		0.679421	0.759949	0.682186	0.666849	0.790258	0.37245	0.70496	0.788497	0.841482	0.462493		0.579165	0.679138	0.575263	0.602414	0.684625	0.260389	0.55577	0.730523	0.774459	0.346398
961.722	990.999	1008.21	990.824	997.47	990.088	984.045	984.22	1000.75	1008.78	988.636	1004.22		29.2767	46.4881	29.102	35.7476	28.3658	22.3228	22.4976	39.0319	47.055	26.9143	42.4941		1.03165		0.584817	0.728678	0.632082	0.606966	0.912458	0.360298	0.678542	0.860726	0.90358	0.585561		0.454974	0.637341	0.508302	0.53095	0.868369	0.246067	0.515993	0.822551	0.862812	0.496047
961.866	993.509	1008.78	991.488	996.272	988.827	984.975	986.233	998.46	1007.9	989.774	1004.02		31.6424	46.9172	29.6218	34.4056	26.9604	23.1088	24.3669	36.5937	46.0347	27.9078	42.1538		1.03998		0.637177	0.741343	0.648568	0.588898	0.874254	0.375996	0.740856	0.813476	0.891126	0.612079		0.52371	0.654269	0.530334	0.509387	0.810924	0.264569	0.609818	0.76235	0.845093	0.528293
962.364	997.459	1011.9	991.997	999.12	990.778	989.847	988.503	997.439	1006.07	988.591	1004.16		35.0951	49.538	29.6326	36.756	28.4142	27.4827	26.1389	35.0749	43.7075	26.2269	41.7931		1.04895		0.712801	0.789508	0.654402	0.634556	0.929347	0.451021	0.801589	0.786441	0.853377	0.580176		0.622984	0.718648	0.538131	0.563876	0.893763	0.352991	0.701261	0.727903	0.791383	0.4895
962.248	996.301	1006.6	993.888	1000.13	990.89	986.058	984.818	999.001	1010.06	990.55	1003.79		34.0527	44.3561	31.6395	37.8825	28.6419	23.8095	22.5695	36.7526	47.8143	28.3014	41.5395		1.05536		0.695851	0.711237	0.702988	0.657997	0.942513	0.393125	0.696353	0.829089	0.93926	0.629889		0.600734	0.614029	0.603063	0.59185	0.91356	0.284756	0.542811	0.782241	0.913579	0.54995
962.604	998.023	1008.58	992.955	1001.09	991.499	988.729	986.072	998.04	1006.43	993.154	1003.58		35.4192	45.9728	30.3506	38.4822	28.8947	26.1249	23.4674	35.4362	43.8261	30.5502	40.9719		1.06998		0.733803	0.747374	0.683695	0.677674	0.964005	0.437331	0.734088	0.81047	0.872846	0.68936		0.650554	0.66233	0.577279	0.615333	0.945876	0.336856	0.599627	0.758519	0.819084	0.622265
962.178	994.929	1017.91	997.239	998.553	990.506	987.202	987.005	1002.6	1012.76	991.885	1003.59		32.7515	55.7313	35.061	36.3751	28.3284	25.0242	24.8268	40.4187	50.5831	29.7076	41.4137		1.05856		0.671295	0.89635	0.781376	0.633733	0.935029	0.414437	0.768327	0.914561	0.996669	0.663195		0.568498	0.861458	0.707823	0.562894	0.902306	0.309873	0.651179	0.891141	0.99526	0.590449
962.225	992.699	1017.24	994.089	1002.77	991.754	991.777	988.322	1001.7	1009.19	991.759	1003.41		30.4743	55.0098	31.8642	40.547	29.529	29.5516	26.0969	39.4776	46.9623	29.534	41.1829		1.0645		0.628122	0.889706	0.714112	0.710377	0.98012	0.49216	0.81216	0.898274	0.930513	0.663015		0.511823	0.852577	0.61793	0.654361	0.970108	0.401476	0.717177	0.87039	0.901134	0.590231
962.641	996.973	1018.81	996.275	1001.08	987.746	988.893	986.345	1001.39	1009.17	997.427	1003.23		34.3316	56.1686	33.6336	38.4343	25.1047	26.2515	23.7043	38.7475	46.5273	34.7864	40.589		1.08007		0.717981	0.92174	0.764796	0.683216	0.845462	0.443597	0.748495	0.894562	0.935383	0.792355		0.629784	0.895395	0.685665	0.621947	0.767632	0.344241	0.621319	0.865661	0.908063	0.747506
962.139	992.194	1020.47	992.648	1004.74	988.382	991.303	983.655	998.36	1007.88	992.139	1003.03		30.0555	58.3293	30.5093	42.6004	26.2433	29.1642	21.5159	36.2211	45.7442	30.0004	40.8883		1.07217		0.623953	0.950191	0.688674	0.75173	0.877338	0.489208	0.67442	0.830114	0.912908	0.678338		0.506351	0.933424	0.583933	0.703712	0.815561	0.397997	0.509787	0.783547	0.876085	0.608864
962.126	991.13	1021.84	995.749	1001.06	989.622	988.653	986.586	1001.79	1011.18	998.308	1002.93		29.0037	59.7093	33.6228	38.9385	27.4958	26.5262	24.4592	39.6659	49.0491	36.1818	40.8068		1.07431		0.60332	0.974613	0.760469	0.688483	0.921046	0.445846	0.768209	0.910876	0.980818	0.819739		0.479265	0.966067	0.679882	0.628233	0.881281	0.346892	0.651002	0.886447	0.972707	0.780805
962.282	994.053	1016.87	996.021	1001.24	989.733	990.781	987.369	997.85	1008.21	995.15	1002.65		31.771	54.5874	33.7396	38.9538	27.4511	28.4994	25.0868	35.5678	45.9305	32.8684	40.3713		1.0859		0.668013	0.900622	0.771342	0.696184	0.929468	0.484178	0.79642	0.825579	0.928364	0.752703		0.564189	0.867167	0.694414	0.637423	0.893945	0.392069	0.693478	0.77777	0.898075	0.69929
962.1	995.784	1016.27	995.652	999.34	992.43	991.966	987.544	998.074	1008.27	995.504	1002.5		33.6848	54.169	33.5522	37.2401	30.33	29.8667	25.4442	35.9743	46.1724	33.4045	40.4047		1.085		0.707667	0.892981	0.766425	0.665007	1.0261	0.506988	0.807099	0.834325	0.932482	0.764349		0.616245	0.856954	0.687842	0.600216	1.03924	0.418952	0.709557	0.788913	0.903935	0.713451
962.169	995.463	1015.13	995.234	1002.01	990.938	992.425	989.737	999.184	1008.52	997.782	1002.32		33.294	52.9638	33.0652	39.8446	28.7691	30.2568	27.568	37.0152	46.3484	35.6133	40.1501		1.09188		0.703892	0.878649	0.760089	0.716027	0.97946	0.516866	0.880011	0.863909	0.941971	0.820056		0.611288	0.837798	0.679374	0.661104	0.969115	0.430594	0.819337	0.826606	0.917436	0.78119
962.119	997.093	1017.1	993.828	1003.69	989.613	994.298	988.072	1001.41	1009.72	994.211	1001.97		34.9739	54.9811	31.7093	41.5732	27.4944	32.1789	25.9532	39.2919	47.5978	32.0926	39.8551		1.09996		0.744882	0.918867	0.734316	0.752622	0.942992	0.553771	0.834598	0.923834	0.974525	0.744457		0.665097	0.891555	0.644931	0.704776	0.914281	0.474088	0.75096	0.902957	0.963754	0.689263
962.072	998.056	1015.12	995.574	1004.89	986.98	991.719	990.356	1000.81	1011.4	991.877	1001.86		35.9833	53.0426	33.5015	42.8132	24.9075	29.6464	28.2831	38.7346	49.3286	29.8049	39.7888		1.1018		0.767658	0.887948	0.777113	0.776362	0.855692	0.511039	0.911038	0.912249	1.01165	0.692541		0.694996	0.850227	0.702126	0.733108	0.783012	0.423726	0.866054	0.888196	1.01657	0.626134
962.393	995.188	1013.69	998.927	1003.15	990.362	991.573	989.461	1001.82	1011.07	994.847	1001.76		32.7952	51.2975	36.5337	40.7528	27.9697	29.1803	27.0686	39.4234	48.6737	32.4544	39.3657		1.11364		0.707163	0.867964	0.856557	0.746942	0.971219	0.50841	0.881288	0.93845	1.00894	0.762209		0.615582	0.823515	0.808297	0.697998	0.956724	0.420628	0.82126	0.921579	1.01272	0.710849
961.484	995.698	1014.47	997.924	1001.54	989.791	992.679	986.666	1004.04	1014.51	997.658	1001.41		34.2134	52.9867	36.4395	40.0592	28.3064	31.1942	25.1813	42.5572	53.0237	36.174	39.9207		1.09816		0.727488	0.884082	0.842471	0.724022	0.969248	0.535943	0.808445	0.998965	1.08383	0.837756		0.642264	0.84506	0.789473	0.670645	0.953759	0.453078	0.711584	0.998682	1.11928	0.802713
961.913	994.086	1014.42	995.715	1008.59	987.793	991.994	989.541	998.171	1010.29	997.096	1001.03		32.1727	52.505	33.8018	46.6802	25.8798	30.0806	27.6278	36.2581	48.3725	35.1825	39.1202		1.12063		0.698093	0.89397	0.797479	0.860952	0.904289	0.527385	0.905139	0.868518	1.00899	0.831465		0.603677	0.858276	0.729343	0.834058	0.856085	0.442991	0.857171	0.832478	1.01279	0.795063
961.641	994.432	1015.79	997.575	1002.35	987.007	991.23	988.378	999.712	1008.92	994.654	1000.86		32.791	54.1466	35.9343	40.7103	25.3665	29.5894	26.737	38.0708	47.2824	33.0127	39.2153		1.11791		0.709784	0.919684	0.845734	0.749024	0.884204	0.517515	0.87383	0.909727	0.983861	0.778294		0.619023	0.892647	0.793834	0.700483	0.825885	0.431359	0.810031	0.884983	0.977037	0.730408
962.417	991.176	1015.43	996.291	1004.86	987.781	993.857	987.88	1002.36	1010.37	997.742	1001.09		28.7591	53.0095	33.8738	42.445	25.3637	31.4403	25.4632	39.9458	47.9527	35.3254	38.6777		1.13345		0.631163	0.912885	0.80832	0.791795	0.896394	0.55753	0.843766	0.967799	1.01168	0.844393		0.515815	0.883559	0.743832	0.751526	0.844215	0.478519	0.764764	0.958973	1.01662	0.810784
961.259	992.347	1012.59	993.9	1005.06	987.933	992.971	988.154	1001.29	1010.81	996.845	1000.96		31.0883	51.3303	32.6416	43.7984	26.6743	31.7123	26.8954	40.03	49.5517	35.5861	39.6985		1.1043		0.664736	0.861237	0.758887	0.796033	0.918472	0.547893	0.868307	0.9449	1.01853	0.828751		0.559888	0.814524	0.677768	0.756583	0.877411	0.467161	0.801715	0.929797	1.02637	0.791763
961.881	994.862	1015.21	1002.04	1007.58	987.198	995.563	990.792	1002.87	1017.05	1004.03	1000.74		32.9804	53.3297	40.1615	45.6938	25.3161	33.6814	28.9101	40.9931	55.1715	42.151	38.8579		1.12819		0.72045	0.914141	0.953918	0.848448	0.890564	0.594502	0.953543	0.988568	1.15858	1.00288		0.633025	0.885237	0.938414	0.819136	0.835448	0.522093	0.930052	0.985434	1.22563	1.0035
962.049	991.481	1017.16	998.244	1003.98	985.278	994.066	990.706	1000.01	1010	1002.61	1000.21		29.432	55.1107	36.1945	41.9268	23.2286	32.0171	28.657	37.9629	47.9467	40.5653	38.1624		1.14875		0.654653	0.961887	0.875362	0.79269	0.832023	0.575426	0.962421	0.932178	1.02521	0.982738		0.546652	0.949056	0.833429	0.752594	0.747423	0.49961	0.943419	0.913588	1.03587	0.979009
961.679	996.269	1013.87	994.149	1007.39	985.957	995.991	987.163	996.36	1008.57	999.488	1000.8		34.5897	52.195	32.4704	45.7107	24.2783	34.3119	25.4838	34.6811	46.8894	37.8092	39.1166		1.12073		0.750608	0.888774	0.766139	0.843149	0.848409	0.601626	0.834975	0.83082	0.978147	0.893625		0.672614	0.851331	0.68746	0.812812	0.772062	0.530489	0.751529	0.784447	0.968907	0.870649
961.93	992.77	1010.19	995.867	1009.78	984.886	993.922	985.172	998.082	1007.62	997.624	1000.11		30.84	48.2633	33.9368	47.8461	22.9561	31.9917	23.2423	36.1519	45.6903	35.6939	38.1794		1.14824		0.685667	0.841999	0.820394	0.904201	0.821897	0.574714	0.780227	0.887314	0.97653	0.864338		0.587364	0.78881	0.759969	0.885673	0.732198	0.498771	0.669096	0.856427	0.966606	0.835037
961.961	996.565	1008.02	995.712	1004.65	982.83	994.865	986.775	1001.23	1010.73	996.618	999.786		34.6045	46.0594	33.7519	42.6889	20.8696	32.9041	24.8145	39.2644	48.7669	34.6571	37.8256		1.15898		0.776558	0.811065	0.823555	0.814284	0.754182	0.596632	0.840794	0.97272	1.05203	0.847081		0.70668	0.747462	0.764193	0.778365	0.630379	0.524604	0.76029	0.965243	1.07403	0.814052
962.011	998.027	1009.65	997.577	1007.91	984.047	995.237	989.738	999.862	1008	997.953	1000.18		36.0161	47.6342	35.5659	45.8983	22.0365	33.2259	27.7273	37.8512	45.991	35.9419	38.1691		1.14855		0.800962	0.831247	0.860007	0.867624	0.789183	0.597045	0.931034	0.929271	0.983221	0.870577		0.738716	0.774439	0.812909	0.842022	0.683008	0.52509	0.89616	0.909884	0.976126	0.842624
961.776	1000.63	1007.93	995.255	1006.56	983.715	999.283	987.485	997.405	1006.44	996.459	1000.06		38.858	46.1557	33.479	44.7789	21.9386	37.5067	25.7087	35.6284	44.6639	34.6824	38.2854		1.14506		0.861537	0.802999	0.807085	0.843892	0.783291	0.671921	0.86063	0.872043	0.951948	0.837518		0.818235	0.736681	0.742182	0.8137	0.674148	0.613336	0.790156	0.836969	0.931631	0.802424

## Sheet: LZ-wt2
Background	WT2-LZ_n1	WT2-LZ_n2	WT2-LZ_n3	WT2-LZ_n4	WT2-LZ_n5	WT2-LZ_n6	WT2-LZ_n7	WT2-LZ_n8	WT2-LZ_n9	WT2-LZ_n10	unfrapped nuclei		WT2-LZ_n1	WT2-LZ_n2	WT2-LZ_n3	WT2-LZ_n4	WT2-LZ_n5	WT2-LZ_n6	WT2-LZ_n7	WT2-LZ_n8	WT2-LZ_n9	WT2-LZ_n10	unfrapped nuclei		ROI2		WT2-LZ_n1	WT2-LZ_n2	WT2-LZ_n3	WT2-LZ_n4	WT2-LZ_n5	WT2-LZ_n6	WT2-LZ_n7	WT2-LZ_n8	WT2-LZ_n9	WT2-LZ_n10		WT2-LZ_n1	WT2-LZ_n2	WT2-LZ_n3	WT2-LZ_n4	WT2-LZ_n5	WT2-LZ_n6	WT2-LZ_n7	WT2-LZ_n8	WT2-LZ_n9	WT2-LZ_n10
967.432	1028.84	1013.72	1009.47	1020.46	1012.89	1031.45	996.824	1023.82	1010.36	1020.79	1000.77		61.4048	46.2914	42.0354	53.0303	45.458	64.0222	29.3912	56.39	42.929	53.3538	33.3405		1.02182		1.15856	1.02605	0.982335	1.16534	1.02336	1.09978	0.784045	1.05723	1.03281	1.15256		1.20178	1.0353	0.978532	1.21276	1.03453	1.11772	0.694771	1.06726	1.04241	1.19574
966.342	1013.25	1012.25	1011.76	1006.31	1011.66	1021.29	1013.56	1018.96	1008.36	1007.59	1001.14		46.9103	45.9094	45.4147	39.9686	45.3212	54.9453	47.218	52.6126	42.0151	41.2499	34.7955		0.979091		0.848071	0.975035	1.01693	0.841578	0.977616	0.904389	1.20692	0.945162	0.968557	0.853823		0.806654	0.966177	1.02057	0.796134	0.96691	0.887204	1.29247	0.935556	0.959367	0.812449
964.21	977.327	977.861	972.969	975.93	980.814	974.457	976.878	973.395	975.072	976.009	1002.73		13.1173	13.6512	8.75878	11.7198	16.6043	10.2473	12.6676	9.18508	10.8621	11.7985	38.5201		0.88442		0.214212	0.261893	0.177163	0.222911	0.323536	0.152359	0.292484	0.149051	0.226188	0.220601		0	0	0	0	0	0	0	0	0	0
967.274	983.104	980.245	993.681	987.508	979.258	983.984	978.397	973.535	981.031	982.381	1003.09		15.8303	12.9712	26.4071	20.2343	11.9841	16.7104	11.123	6.2611	13.7576	15.1071	35.813		0.951273		0.278058	0.267658	0.574508	0.413948	0.251162	0.267235	0.276234	0.109282	0.308138	0.303814		0.0812511	0.00781068	0.482896	0.245837	-0.106988	0.135524	-0.0229678	-0.0467347	0.105904	0.106767
967.414	986.308	980.754	995.279	981.94	982.389	985.635	981.06	979.956	981.529	979.698	1003.42		18.8934	13.3394	27.8652	14.5262	14.9745	18.2203	13.6456	12.542	14.1146	12.2835	36.001		0.946306		0.330129	0.273819	0.603065	0.295622	0.312197	0.289861	0.337112	0.217767	0.314483	0.24574		0.147517	0.0161575	0.517602	0.0935688	-0.0167626	0.162217	0.0630773	0.0807523	0.114105	0.0322552
965.298	988.261	981.827	983.012	984.577	984.303	987.83	982.493	982.334	980.185	983.311	1003.42		22.9629	16.528	17.7132	19.278	19.0043	22.5316	17.1945	17.0358	14.8869	18.0124	38.1221		0.893655		0.378912	0.320396	0.362025	0.370498	0.374168	0.338505	0.401153	0.279336	0.313237	0.340302		0.209599	0.0792603	0.224664	0.189923	0.0748482	0.219604	0.153593	0.153106	0.112494	0.153582
966.147	989.02	981.822	985.773	991.773	987.67	986.858	982.194	988.955	986.97	982.956	1003.43		22.8729	15.675	19.6263	25.6263	21.5232	20.7115	16.047	22.8078	20.8228	16.8094	37.2843		0.913736		0.385907	0.310687	0.410136	0.503568	0.433282	0.318151	0.382792	0.382381	0.447977	0.324709		0.2185	0.0661063	0.283135	0.361165	0.162235	0.195592	0.127641	0.2742	0.28662	0.133575
965.788	993.722	980.014	988.521	990.388	987.457	987.071	979.43	990.391	984.458	988.932	1003.96		27.934	14.2265	22.7333	24.6005	21.6696	21.2829	13.6417	24.6028	18.6699	23.1445	38.1712		0.892505		0.460347	0.275426	0.464027	0.472179	0.426094	0.319333	0.317855	0.402892	0.392328	0.436697		0.313233	0.0183337	0.348628	0.320772	0.151609	0.196986	0.035859	0.298303	0.214704	0.27726
966.265	994.984	982.371	984.6	993.317	989.283	988.263	983.325	989.41	986.85	988.987	1003.31		28.7188	16.1056	18.3351	27.0515	23.0177	21.9982	17.0594	23.1446	20.5852	22.7216	37.0495		0.919526		0.487609	0.321245	0.385583	0.534944	0.466305	0.340058	0.409522	0.390488	0.445673	0.441698		0.347927	0.080411	0.253294	0.401541	0.211052	0.221437	0.165421	0.283726	0.283642	0.283676
964.895	992.703	983.74	990.182	989.092	991.489	986.734	991.484	993.868	985.778	987.867	1003.43		27.808	18.8454	25.2865	24.1971	26.5939	21.8387	26.5888	28.9725	20.8829	22.9718	38.5366		0.884042		0.453924	0.361387	0.511247	0.460032	0.517962	0.324564	0.613649	0.46995	0.43467	0.429328		0.30506	0.134796	0.406015	0.30514	0.287416	0.203158	0.453934	0.377107	0.269423	0.267805
966.517	993.317	981.191	986.825	997.183	992.168	986.53	989.047	987.419	996.136	988.294	1003.75		26.8	14.6745	20.3087	30.6659	25.6515	20.0138	22.5305	20.9022	29.6192	21.7773	37.2287		0.9151		0.45284	0.291291	0.425031	0.603499	0.51716	0.307893	0.538255	0.350957	0.638173	0.421303		0.303679	0.0398284	0.301236	0.489761	0.28623	0.18349	0.347373	0.237271	0.532411	0.257509
967.55	992.09	994.023	987.497	1000.24	993.039	992.738	988.371	995.176	991.869	991.44	1004.12		24.54	26.4726	19.947	32.6874	25.489	25.188	20.8207	27.6255	24.319	23.8893	36.5676		0.931644		0.422149	0.534986	0.425008	0.654912	0.523174	0.394499	0.506401	0.47223	0.533449	0.470517		0.264622	0.36999	0.301209	0.555922	0.295121	0.285663	0.30235	0.379786	0.397074	0.320653
967.175	991.695	993.699	986.555	997.499	993.504	986.142	989.504	992.286	999.095	990.405	1003.39		24.5195	26.5236	19.3792	30.3234	26.3286	18.9667	22.3283	25.1106	31.9193	23.2292	36.2097		0.940852		0.425966	0.541315	0.416992	0.613553	0.54575	0.299996	0.548437	0.433483	0.707086	0.462039		0.26948	0.378565	0.291466	0.502699	0.328493	0.174174	0.361763	0.334253	0.621466	0.309774
965.631	994.304	995.024	987.724	998.706	993.841	986.453	992.361	988.531	993.527	992.813	1003.34		28.6727	29.3931	22.0925	33.0749	28.2096	20.8214	26.7292	22.8995	27.8953	27.1813	37.7046		0.90355		0.478368	0.576094	0.456528	0.642693	0.561556	0.316275	0.630504	0.37964	0.593445	0.519212		0.336167	0.425685	0.339514	0.540198	0.351859	0.193378	0.477756	0.270978	0.474608	0.38313
966.309	997.409	993.211	985.997	1003.04	989.12	987.589	983.201	989.433	997.302	992.165	1003.59		31.1002	26.9022	19.6883	36.7304	22.8117	21.2809	16.8925	23.1241	30.993	25.8561	37.2814		0.913807		0.524757	0.533258	0.411464	0.721826	0.459257	0.326923	0.402993	0.387715	0.66683	0.499504		0.395203	0.36765	0.284748	0.642031	0.200633	0.205941	0.156193	0.280468	0.569443	0.357844
966.393	991.701	1001.74	999.71	1003.2	990.801	984.84	986.734	986.762	999.427	992.589	1003.72		25.3073	35.3485	33.3171	36.8072	24.4072	18.4468	20.341	20.3684	33.0334	26.1959	37.3313		0.912585		0.426442	0.699745	0.695361	0.722368	0.490721	0.283006	0.484613	0.341054	0.70978	0.505392		0.270086	0.593209	0.62977	0.642728	0.247146	0.15413	0.271554	0.225634	0.624948	0.365399
966.305	991.032	1000.79	996.441	1003.3	991.239	987.211	987.692	983.422	996.187	990.202	1004.19		24.7273	34.4886	30.1358	36.9908	24.9336	20.906	21.3871	17.1173	29.8821	23.8976	37.8867		0.899208		0.410561	0.672715	0.619744	0.715329	0.493956	0.316033	0.502066	0.282415	0.632656	0.454293		0.249875	0.556588	0.537872	0.633671	0.251928	0.193093	0.296223	0.156724	0.525281	0.299836
965.732	990.482	1001.08	997.109	1007.78	993.736	984.394	987.968	987.037	999.131	992.82	1003.31		24.7497	35.3474	31.3764	42.0456	28.0039	18.6613	22.2352	21.3043	33.3986	27.0877	37.5735		0.906703		0.414359	0.695214	0.650637	0.819858	0.559407	0.284452	0.526328	0.354427	0.713002	0.51923		0.254709	0.587071	0.575416	0.768183	0.348682	0.155836	0.330514	0.241349	0.629112	0.383153
965.497	990.532	1001.65	998.048	1003.98	995.263	984.606	989.892	984.525	994.142	992.592	1003.16		25.0357	36.1543	32.5519	38.4785	29.7666	19.1091	24.3956	19.0287	28.6456	27.0953	37.6592		0.90464		0.418192	0.709465	0.673475	0.748593	0.593264	0.290614	0.57615	0.315847	0.610141	0.518192		0.259587	0.606377	0.603172	0.676476	0.398733	0.163106	0.400933	0.196012	0.496184	0.381822
967.238	992.654	1001.3	1001.99	1003.71	993.875	986.555	989.548	986.255	995.435	991.191	1002.82		25.4161	34.0642	34.7499	36.4684	26.6368	19.3166	22.3105	19.0166	28.1967	23.9527	35.5836		0.957409		0.449312	0.707443	0.760888	0.750873	0.561854	0.310907	0.557643	0.33406	0.635613	0.484813		0.29919	0.603638	0.709406	0.67941	0.3523	0.187046	0.374775	0.217414	0.529102	0.338995
965.835	992.218	1000.4	995.222	1001.17	992.836	988.639	989.702	990.99	994.071	993.922	1002.61		26.3836	34.5618	29.3874	35.338	27.0015	22.804	23.8679	25.1559	28.2366	28.0873	36.771		0.926491		0.451353	0.694597	0.622691	0.704102	0.551154	0.355185	0.577304	0.427636	0.615957	0.55014		0.301788	0.586235	0.541453	0.619223	0.336482	0.239282	0.402564	0.327382	0.503701	0.422812
966.112	993.645	999.83	996.017	1002.69	995.777	988.568	991.327	987.943	998.473	991.121	1001.64		27.5339	33.7188	29.9058	36.5822	29.665	22.457	25.2155	21.8312	32.3612	25.0095	35.5236		0.959025		0.487572	0.701451	0.655927	0.754488	0.626784	0.362062	0.631316	0.38415	0.730721	0.507057		0.34788	0.595521	0.581845	0.684062	0.448285	0.247396	0.478904	0.276279	0.65201	0.367535
966.694	987.901	998.365	997.498	1001.26	996.22	990.507	991.838	987.592	996.067	993.583	1001.83		21.2073	31.6708	30.8038	34.5712	29.5262	23.8136	25.1445	20.8981	29.3729	26.8896	35.1363		0.969596		0.37968	0.666109	0.68307	0.720871	0.630728	0.388166	0.636478	0.371784	0.670555	0.551185		0.210576	0.547639	0.614832	0.640802	0.454115	0.278192	0.486199	0.261747	0.574258	0.424152
964.601	988.874	1002.51	994.958	999.028	991.464	990.529	986.577	990.842	995.849	993.136	1002.34		24.2727	37.9064	30.3571	34.4265	26.8628	25.9277	21.9752	26.2409	31.2475	28.5344	37.7389		0.902728		0.404591	0.742276	0.62674	0.668348	0.53426	0.393481	0.517893	0.43464	0.664155	0.544563		0.242278	0.650831	0.546375	0.573212	0.311508	0.284462	0.318592	0.335612	0.565987	0.415656
965.814	989.275	994.384	994.046	1002.01	996.21	990.321	990.116	992.441	993.513	995.818	1000.65		23.4608	28.5695	28.2315	36.1966	30.396	24.5064	24.3019	26.627	27.6993	30.0037	34.8389		0.977873		0.423611	0.606012	0.631375	0.761206	0.654853	0.40287	0.620402	0.477748	0.637746	0.620269		0.266483	0.466218	0.552007	0.692707	0.489777	0.295539	0.463478	0.386271	0.531858	0.51279
965.968	994.127	1000.22	995.332	1001.88	994.503	990.181	994.907	991.746	997.324	992.345	1000.88		28.1587	34.2545	29.3645	35.9138	28.5347	24.2134	28.9389	25.7777	31.3565	26.377	34.9125		0.97581		0.507364	0.725068	0.655327	0.753667	0.613455	0.397213	0.73722	0.461534	0.720428	0.544143		0.373068	0.627518	0.581117	0.683006	0.428581	0.288865	0.628588	0.367217	0.638708	0.415118
965.474	993.172	1006.44	1000.11	999.139	996.193	989.417	997.263	990.086	992.844	993.464	1001.85		27.6977	40.9682	34.636	33.6648	30.7184	23.9429	31.7883	24.6116	27.37	27.9898	36.3751		0.936574		0.47899	0.832308	0.741889	0.678063	0.633846	0.376981	0.777245	0.422936	0.60355	0.554196		0.336958	0.772808	0.686316	0.585714	0.458724	0.264997	0.68516	0.321858	0.487666	0.428016
966.623	988.189	997.986	990.948	998.02	992.856	990.082	992.991	992.923	995.087	993.739	1001.91		21.5658	31.3633	24.3253	31.3971	26.2331	23.4596	26.3683	26.2997	28.4637	27.1158	35.2839		0.96554		0.384484	0.656883	0.537154	0.651948	0.558039	0.380797	0.664664	0.465924	0.647082	0.553497		0.216689	0.535139	0.4375	0.552108	0.34666	0.269498	0.526038	0.372376	0.543923	0.427119
966.587	990.611	999.089	993.284	995.546	993.765	991.046	996.749	997.279	998.787	993.058	1002.27		24.0243	32.5019	26.6974	28.959	27.1784	24.4595	30.162	30.6925	32.2007	26.4715	35.6823		0.954759		0.423531	0.673128	0.582951	0.594606	0.57169	0.392593	0.751801	0.537674	0.723862	0.534311		0.266381	0.557148	0.493157	0.478317	0.36684	0.283414	0.649196	0.456693	0.643145	0.402502
966.102	989.005	1006.43	987.219	994.285	990.119	992.092	995.844	994.072	993.032	993.942	1002.06		22.9036	40.3258	21.1169	28.1829	24.0175	25.99	29.7418	27.97	26.9303	27.8399	35.9615		0.947347		0.400639	0.82868	0.457518	0.574178	0.50128	0.41392	0.735572	0.486177	0.600685	0.557568		0.237249	0.767893	0.340718	0.45203	0.262754	0.308575	0.626258	0.396176	0.483964	0.432343
964.854	991.95	1003.88	998.382	997.699	993.307	995.054	998.178	991.568	991.828	992.763	1002		27.0955	39.0308	33.5276	32.8447	28.453	30.1998	33.3238	26.7142	26.974	27.9085	37.1465		0.917126		0.458847	0.776483	0.703237	0.647809	0.574912	0.465624	0.797872	0.449536	0.582468	0.541113		0.311324	0.697176	0.639342	0.546782	0.371603	0.369572	0.714313	0.353118	0.460422	0.41123
964.756	989.423	1009.99	1001.13	999.017	989.552	1001.82	1000.42	990.531	991.936	994.454	1002.51		24.6671	45.2305	36.3713	34.2608	24.7959	37.0658	35.6664	25.7747	27.1804	29.6982	37.7581		0.902269		0.410956	0.885245	0.750525	0.664793	0.492902	0.562227	0.840127	0.426701	0.577417	0.566485		0.250379	0.844527	0.696811	0.568638	0.250369	0.483539	0.774037	0.326283	0.453894	0.443784
965.412	989.798	1002.54	998.577	999.104	991.916	1000.7	999.787	991.28	991.181	994.675	1003.68		24.3853	37.1228	33.1644	33.6914	26.5037	35.2848	34.3743	25.8678	25.7686	29.2626	38.2651		0.890316		0.400879	0.716935	0.675283	0.645082	0.519869	0.528121	0.798964	0.422568	0.540171	0.550781		0.237554	0.616499	0.605369	0.543273	0.290235	0.443303	0.715856	0.321426	0.405762	0.423634
966.772	992.946	1008.05	1002.47	1000.88	990.45	998.448	997.012	993.059	992.39	993.174	1003.63		26.1741	41.2816	35.6993	34.1054	23.6777	31.6753	30.2401	26.287	25.618	26.4017	36.857		0.924328		0.446723	0.827709	0.754667	0.677955	0.482179	0.492207	0.729723	0.44582	0.557529	0.515916		0.295895	0.766577	0.701845	0.585576	0.234519	0.400934	0.617992	0.348751	0.428194	0.378902
966.156	991.112	1001.3	998.754	1000.56	992.787	1004.09	996.661	991.934	991.954	992.17	1003.34		24.9568	35.1494	32.5986	34.4049	26.6316	37.9297	30.5055	25.7784	25.7985	26.0142	37.1859		0.916153		0.42218	0.698524	0.683025	0.67786	0.537537	0.584183	0.729617	0.433328	0.556492	0.503849		0.264662	0.591554	0.614778	0.585454	0.316353	0.509442	0.617842	0.334071	0.426853	0.363418
965.296	989.13	1005.97	995.516	1003.33	993.526	1001.37	997.455	991.261	993.183	994.77	1003.34		23.8337	40.6729	30.2196	38.0384	28.2301	36.0741	32.1584	25.9645	27.8872	29.4739	38.0441		0.895488		0.394087	0.790061	0.618897	0.732545	0.55695	0.543072	0.751802	0.426612	0.587979	0.557981		0.228911	0.71557	0.536843	0.655825	0.34505	0.460941	0.649198	0.326178	0.467544	0.432872
966.248	993.013	1004.89	997.387	1006.61	995.719	1003.38	1001.39	994.69	993.995	992.771	1002.84		26.7647	38.6456	31.139	40.3597	29.4705	37.1315	35.1458	28.4417	27.7466	26.5227	36.5898		0.93108		0.46014	0.780516	0.663072	0.80814	0.60453	0.581207	0.854297	0.485887	0.608265	0.522067		0.31297	0.70264	0.590529	0.753105	0.415386	0.505931	0.794065	0.395836	0.49376	0.386793
966.634	993.435	1008.02	990.922	1007.17	996.133	1005.49	1002.49	998.78	995.312	995.284	1002.63		26.8005	41.3836	24.2873	40.5336	29.4989	38.8596	35.859	32.1453	28.6775	28.6501	35.9957		0.946447		0.468361	0.849612	0.52571	0.825019	0.615101	0.618297	0.886021	0.558223	0.63905	0.573251		0.323432	0.796251	0.423592	0.774826	0.431013	0.549687	0.838903	0.480842	0.533544	0.452464
966.333	995.231	1007.4	990.008	1004.69	996.835	1005.87	1003.41	996.943	995.547	993.181	1003.09		28.8978	41.0684	23.675	38.3594	30.5027	39.5405	37.0756	30.6108	29.2138	26.8478	36.759		0.926792		0.494525	0.82563	0.501813	0.764551	0.622823	0.616065	0.897057	0.520536	0.637481	0.526033		0.356729	0.763761	0.39455	0.697012	0.442428	0.547054	0.8545	0.436553	0.531516	0.391882
964.46	988.972	1008.42	995.401	995.785	993.841	1004.31	1004.98	993.596	993.367	994.121	1003.38		24.5116	43.9557	30.9408	31.3248	29.3805	39.8498	40.5189	29.1352	28.907	29.6607	38.9153		0.87544		0.396222	0.834712	0.61948	0.589748	0.566668	0.586481	0.926047	0.467991	0.595835	0.548946		0.231628	0.776065	0.537552	0.472066	0.359417	0.512153	0.895475	0.374805	0.477696	0.42128
967.032	991.01	1007.22	997.699	991.919	996.963	1003.04	1005.83	995.938	992.669	996.903	1003.73		23.9779	40.1844	30.6667	24.8867	29.931	36.0097	38.7959	28.9056	25.6368	29.8711	36.701		0.928258		0.41098	0.809136	0.651036	0.496807	0.612115	0.56194	0.940164	0.492315	0.560311	0.586194		0.250408	0.741414	0.575902	0.352465	0.4266	0.4832	0.915428	0.40339	0.431788	0.469071
967.4	990.454	1007.42	996.087	1000.75	997.162	1002.31	1007.3	999.469	992.137	995.462	1003.77		23.0538	40.0229	28.6865	33.3466	29.7614	34.9145	39.9012	32.0685	24.7366	28.0618	36.3705		0.936694		0.398733	0.813209	0.614533	0.671741	0.614179	0.549801	0.975738	0.55115	0.545551	0.555694		0.234822	0.746932	0.53154	0.577579	0.429651	0.46888	0.965708	0.47253	0.412714	0.429938
965.408	990.736	1002.41	997.664	998.245	995.953	999.814	1008.41	999.482	994.641	996.203	1003.9		25.3274	37.0025	32.2556	32.8365	30.5451	34.4057	42.9983	34.0738	29.2334	30.7953	38.4921		0.885065		0.41391	0.710397	0.652905	0.625006	0.595607	0.511926	0.993517	0.553336	0.609188	0.576211		0.254138	0.607641	0.578173	0.517437	0.402197	0.424197	0.990838	0.475099	0.494952	0.456262
966.749	989.396	1002.78	993.576	992.075	998.07	1002.73	1007.19	995.688	991.936	994.548	1003.99		22.6478	36.0361	26.8271	25.3259	31.3209	35.984	40.4405	28.939	25.187	27.7989	37.243		0.914749		0.382534	0.715049	0.561237	0.498219	0.63122	0.553368	0.965758	0.485713	0.542471	0.537592		0.214208	0.613944	0.466768	0.354281	0.454842	0.473088	0.951603	0.395631	0.408734	0.406712
966.927	993.02	1007.57	993.865	995.261	997.741	1004.96	1006.32	995.869	993.199	996.963	1004.23		26.0935	40.6462	26.9378	28.3339	30.8141	38.0283	39.3884	28.9421	26.2725	30.0367	37.3064		0.913195		0.439984	0.805154	0.562594	0.556445	0.61995	0.583811	0.939033	0.484939	0.564887	0.579879		0.287319	0.736019	0.468418	0.42921	0.438182	0.509003	0.91383	0.394721	0.437703	0.460969
965.385	991.846	1001.12	992.26	994.548	997.652	1004.77	1004.04	1002.62	990.828	996.891	1004.35		26.46	35.7377	26.8742	29.163	32.2662	39.3849	38.6589	37.235	25.4426	31.5057	38.9605		0.874424		0.427221	0.677866	0.537437	0.548411	0.621604	0.578967	0.882512	0.597402	0.523818	0.582416		0.271077	0.563568	0.437844	0.418872	0.440626	0.503288	0.833943	0.526883	0.384629	0.464223
965.982	990.755	1002.84	994.28	997.032	996.338	1005.69	999.849	1004.53	992.848	993.165	1004.29		24.7729	36.8561	28.2978	31.0497	30.3559	39.7058	33.867	38.5501	26.8657	27.1828	38.3076		0.889327		0.406799	0.710995	0.575552	0.593843	0.59477	0.593632	0.786299	0.629043	0.562545	0.511068		0.245088	0.608451	0.484165	0.477336	0.400958	0.52059	0.697957	0.564067	0.434676	0.37268
964.428	991.492	1003.01	998.784	997.1	999.239	1002.55	1002.55	999.391	990.082	993.918	1004.55		27.0646	38.5806	34.3561	32.6725	34.8119	38.1219	38.1273	34.9638	25.6549	29.49	40.1206		0.84914		0.424347	0.710629	0.667196	0.596641	0.651253	0.544197	0.845208	0.544743	0.512915	0.529389		0.267419	0.607955	0.595541	0.480936	0.484456	0.462268	0.781218	0.465001	0.370539	0.396188
966.449	989.246	1001.55	998.24	1000.62	999.004	1001.22	1002.45	1005.92	993.176	992.417	1004.54		22.7968	35.1056	31.7911	34.1712	32.5553	34.7675	35.9986	39.469	26.7266	25.9677	38.0959		0.894268		0.376428	0.680988	0.650194	0.657173	0.641406	0.522688	0.840431	0.647615	0.56274	0.490934		0.206438	0.567797	0.574878	0.558833	0.469899	0.436894	0.774467	0.585892	0.434928	0.346848
964.651	993.382	1008.68	1002.26	998.678	998.95	1004.31	1005.07	998.555	991.846	996.251	1004.3		28.7313	44.0252	37.6117	34.0278	34.2993	39.6578	40.4194	33.9048	27.196	31.6007	39.6447		0.859332		0.455887	0.82065	0.739186	0.62885	0.649367	0.572917	0.906777	0.534584	0.550254	0.57409		0.307558	0.757013	0.683031	0.522385	0.481668	0.496151	0.868238	0.453062	0.418792	0.45354
965.443	992.05	997.456	998.401	1000.75	998.828	998.589	1004.99	1004	993.493	994.823	1004.17		26.6068	32.0132	32.9577	35.3074	33.3848	33.1458	39.5426	38.5605	28.0502	29.3806	38.7267		0.879703		0.432185	0.610886	0.663075	0.667965	0.647036	0.490192	0.908135	0.622403	0.58099	0.54641		0.277394	0.472822	0.590533	0.57272	0.478222	0.398556	0.870158	0.556264	0.458512	0.418026
966.431	991.28	996.264	998.308	993.587	1000.45	1002.17	999.04	1004.19	996.605	993.244	1003.91		24.8494	29.8335	31.877	27.1561	34.0233	35.7357	32.6096	37.7577	30.1738	26.8133	37.4759		0.909064		0.417112	0.588294	0.662739	0.530903	0.681421	0.546134	0.773909	0.629787	0.645836	0.515309		0.258212	0.442214	0.590124	0.396341	0.529052	0.464554	0.680444	0.564941	0.542313	0.378122
966.833	990.56	999.381	997.084	997.163	999.147	1003.38	1002.12	1002.29	995.078	994.474	1004.22		23.7274	32.5478	30.2512	30.3306	32.3138	36.5452	35.2871	35.4607	28.2455	27.6409	37.3884		0.911193		0.399211	0.643319	0.630408	0.594351	0.648696	0.559811	0.839411	0.592859	0.605976	0.532456		0.235431	0.516763	0.550833	0.477989	0.480676	0.48069	0.773025	0.521545	0.490802	0.400122
966.51	997.021	995.034	995.782	999.937	1000.71	1004.61	1002.61	996.532	995.579	994.322	1004.57		30.5106	28.5237	29.2723	33.4266	34.1965	38.0951	36.0988	30.0218	29.0687	27.8117	38.0584		0.89515		0.5043	0.553858	0.599271	0.643489	0.674405	0.573279	0.843604	0.493091	0.612658	0.526316		0.369168	0.395558	0.512991	0.541223	0.518681	0.496578	0.778951	0.404301	0.499436	0.392244
965.776	991.37	995.369	995.149	998.898	1000.01	1001.71	1004.12	997.795	993.459	994.441	1003.86		25.5945	29.5933	29.3733	33.1226	34.2367	35.9337	38.3451	32.0189	27.6834	28.6657	38.0856		0.894512		0.422741	0.574216	0.600909	0.637181	0.674717	0.540368	0.895458	0.525516	0.583046	0.542089		0.265375	0.42314	0.514982	0.533105	0.519143	0.457752	0.852241	0.442406	0.461169	0.412482
965.862	992.708	993.153	993.918	1000.77	1001.65	1005.12	1003.21	998.506	994.153	994.719	1004.59		26.8467	27.2911	28.0563	34.9097	35.7866	39.2558	37.3472	32.6446	28.2908	28.8574	38.7315		0.879594		0.436028	0.520714	0.564394	0.66036	0.6935	0.580481	0.85761	0.52685	0.585901	0.536613		0.282285	0.350654	0.470605	0.562933	0.546909	0.505074	0.798746	0.443974	0.464859	0.405457
967.897	996.707	998.726	995.828	1002.62	1000.91	1004.21	1003.17	1001.29	994.805	991.909	1005.17		28.8106	30.8291	27.9315	34.724	33.0166	36.3128	35.2758	33.3885	26.9079	24.0127	37.2725		0.914026		0.486241	0.611244	0.583878	0.682559	0.664866	0.557981	0.841752	0.559949	0.579075	0.464003		0.346186	0.473306	0.494284	0.5915	0.50458	0.478531	0.776334	0.48287	0.456037	0.312295
966.685	994.706	999.639	995.396	1002.99	1000.83	1000.29	1003.61	1003.38	996.786	991.242	1005.15		28.0218	32.9547	28.7119	36.3015	34.1425	33.6018	36.9218	36.6968	30.1018	24.5575	38.4609		0.885782		0.458315	0.633199	0.581646	0.691519	0.666294	0.50037	0.853806	0.596415	0.627793	0.459868		0.310648	0.503051	0.491572	0.60303	0.506691	0.410564	0.79337	0.525724	0.518996	0.30699
966.808	998.721	993.16	993.975	1006.38	1000.63	1004.25	1004.83	993.304	997.909	995.193	1004.69		31.9132	26.352	27.167	39.5669	33.8232	37.439	38.0218	26.4955	31.1008	28.3851	37.8836		0.899281		0.529916	0.514049	0.558737	0.765209	0.670122	0.566007	0.892642	0.437181	0.658512	0.539645		0.401767	0.341625	0.463729	0.697858	0.51235	0.487998	0.848261	0.338598	0.558695	0.409346
966.437	994.653	995.016	1000.41	1005.76	999.66	999.834	1004.83	993.505	997.897	995.19	1004.92		28.2152	28.5783	33.9713	39.3195	33.2225	33.3968	38.3963	27.0674	31.4599	28.753	38.4833		0.885268		0.46121	0.54879	0.687791	0.748574	0.647963	0.497028	0.887387	0.439657	0.655735	0.53812		0.314331	0.388693	0.62057	0.676452	0.479593	0.406621	0.840833	0.341508	0.555106	0.40739
967.278	994.398	999.38	1000.44	1001.84	999.605	1004.73	1002.06	994.249	996.288	996.01	1004.77		27.1198	32.1017	33.1636	34.56	32.327	37.4561	34.7855	26.9711	29.0105	28.7319	37.4958		0.908582		0.45498	0.632686	0.689122	0.675291	0.647102	0.572122	0.825111	0.449632	0.620607	0.551888		0.306404	0.502357	0.622188	0.582147	0.478319	0.495214	0.752812	0.35323	0.50971	0.425055
966.422	998.282	996.959	999.36	1007.96	1002.46	998.617	1004.83	995.925	995.561	996.884	1004.57		31.8607	30.5376	32.9384	41.5367	36.0367	32.1952	38.4084	29.5031	29.1397	30.462	38.1522		0.892951		0.525319	0.591503	0.672666	0.797648	0.70895	0.483305	0.89537	0.483379	0.612645	0.575052		0.395917	0.446561	0.602188	0.739603	0.569748	0.390431	0.852116	0.392888	0.49942	0.454775
966.203	995.192	995.474	1001.34	1004.83	1003.04	1003.33	1003.5	996.251	998.901	996.98	1004.57		28.9891	29.2714	35.136	38.6305	36.8419	37.1238	37.2973	30.0488	32.6987	30.7771	38.3689		0.887906		0.475273	0.563775	0.713492	0.737649	0.720697	0.554142	0.864557	0.489539	0.683588	0.577719		0.332228	0.408995	0.651805	0.662393	0.587114	0.474002	0.808566	0.400128	0.5911	0.458197
965.179	993.613	997.045	999.872	1004.62	1003.03	1002.61	1002.02	996.678	996.266	994.392	1004.07		28.4348	31.8664	34.6938	39.4377	37.8524	37.4355	36.8404	31.4991	31.0872	29.2136	38.8889		0.876035		0.459951	0.605549	0.695095	0.742993	0.730564	0.551323	0.842548	0.506305	0.641209	0.541038		0.31273	0.465591	0.629446	0.66927	0.601699	0.470676	0.777458	0.41983	0.536333	0.411134
966.879	998.132	999.904	999.11	1005.25	1005.12	1004.02	1002.86	998.292	996.412	992.108	1004.31		31.2527	33.0246	32.231	38.376	38.2452	37.1455	35.9774	31.413	29.5334	25.2293	37.4358		0.910037		0.525155	0.651916	0.670814	0.751053	0.766795	0.568286	0.854747	0.524519	0.632804	0.485385		0.395708	0.52841	0.599938	0.679642	0.65526	0.490687	0.794701	0.441235	0.525471	0.339728
965.999	999.667	1000.04	1000.03	1003.42	1004.91	1004.57	1000.64	998.881	996.897	994.737	1003.76		33.668	34.0432	34.032	37.4196	38.9152	38.5667	34.6436	32.8821	30.8982	28.7383	37.7632		0.902148		0.560837	0.666199	0.702159	0.725988	0.773466	0.584914	0.815925	0.544291	0.656309	0.548102		0.441117	0.54776	0.638032	0.647387	0.66512	0.510305	0.73983	0.464469	0.555847	0.420197
965.805	999.55	1004.78	1001.89	999.676	1004.21	1004.6	1000.94	993.051	997.359	992.26	1004.06		33.7457	38.9721	36.0832	33.8713	38.4032	38.7943	35.1325	27.2464	31.5546	26.4549	38.2524		0.89061		0.554942	0.7529	0.734958	0.648742	0.753527	0.580841	0.816857	0.445236	0.661679	0.4981		0.433615	0.665224	0.677893	0.547983	0.635646	0.5055	0.741147	0.348064	0.562787	0.356042
966.652	999.951	1006.57	1001.98	996.429	1005.38	1008.06	1004.88	993.35	998.313	995.051	1004.08		33.2983	39.9169	35.3271	29.7771	38.724	41.4082	38.2274	26.6975	31.661	28.3989	37.4244		0.910314		0.559699	0.788213	0.735477	0.582943	0.776632	0.633694	0.90848	0.445918	0.678598	0.546531		0.439669	0.713067	0.678523	0.463309	0.669801	0.567852	0.870646	0.348866	0.584652	0.418181
965.939	997.388	1003.74	999.315	1002.12	1004.76	1005.56	1004.07	994.527	996.123	992.861	1004.21		31.4482	37.8002	33.3759	36.1824	38.8193	39.6244	38.1291	28.5879	30.1832	26.922	38.2683		0.89024		0.516944	0.729955	0.679531	0.692718	0.761374	0.593023	0.886163	0.466964	0.632658	0.506682		0.385259	0.634139	0.610532	0.604573	0.647246	0.51987	0.839104	0.373598	0.525283	0.367054
964.906	997.553	1003.11	998.131	997.72	1003.79	1001.93	1008.82	992.422	996.217	994.315	1003.56		32.6473	38.2056	33.2249	32.814	38.8859	37.0223	43.9127	27.5165	31.3118	29.4095	38.6536		0.881366		0.531306	0.73043	0.669715	0.621968	0.755079	0.548557	1.01041	0.444982	0.649772	0.547982		0.403536	0.634782	0.598602	0.513528	0.637939	0.467412	1.01471	0.347766	0.5474	0.420043
966.111	996.375	1002.59	1001.18	1001.04	1003.24	1004.51	1005.93	996.907	997.841	993.966	1003.64		30.2637	36.4837	35.0734	34.9246	37.132	38.3983	39.823	30.7956	31.7299	27.8549	37.5265		0.907837		0.507307	0.718459	0.728208	0.681854	0.742677	0.586032	0.943824	0.512967	0.678224	0.534603		0.372995	0.618563	0.669689	0.590593	0.619606	0.511624	0.920601	0.427659	0.584168	0.402877
965.788	995.87	1002.58	994.088	998.433	1001.86	1003.24	1004.28	992.938	997.075	992.981	1003.64		30.0815	36.7941	28.3002	32.6444	36.0766	37.4487	38.4895	27.1499	31.2867	27.1927	37.8484		0.900117		0.499966	0.718411	0.582585	0.631918	0.715433	0.56668	0.904464	0.448395	0.663065	0.517457		0.363653	0.618499	0.492712	0.526332	0.579332	0.488793	0.864969	0.351777	0.564578	0.380878
966.096	994.847	1002.64	995.299	998.648	1002.66	1003.29	1007.56	996.704	995.584	993.18	1003.51		28.7508	36.5403	29.2031	32.5517	36.5659	37.1896	41.4666	30.6075	29.4875	27.0843	37.4181		0.910469		0.483343	0.721659	0.608084	0.637369	0.733474	0.56923	0.985626	0.511312	0.63212	0.52132		0.342499	0.622899	0.523701	0.533347	0.606001	0.491801	0.979685	0.425714	0.524587	0.385834
964.783	992.47	1005.05	996.424	999.897	1001.95	1002.87	1008.17	997.894	996.182	991.12	1003.72		27.6865	40.2703	31.6406	35.1137	37.1688	38.0909	43.3855	33.1103	31.3991	26.3371	38.935		0.874997		0.447318	0.764341	0.633172	0.660748	0.716522	0.560312	0.991062	0.531574	0.646876	0.487189		0.296652	0.680725	0.554191	0.563433	0.580941	0.48128	0.987367	0.449525	0.543657	0.342043
966.089	993.484	1003.01	994.288	998.787	1004.51	1004.55	1007.09	998.939	995.946	990.892	1003.57		27.3947	36.9192	28.1988	32.6983	38.4177	38.4658	40.9965	32.8496	29.8572	24.8026	37.4812		0.908936		0.45977	0.727915	0.586183	0.639161	0.769322	0.587773	0.972812	0.547843	0.638968	0.476598		0.312499	0.631375	0.497086	0.535654	0.658994	0.513677	0.961573	0.468644	0.533437	0.328455
965.712	993.482	1002.87	994.369	996.854	1001	1004.69	1008.15	1000.24	997.729	990.782	1003.44		27.7702	37.159	28.6567	31.142	35.2925	38.9785	42.4407	34.5285	32.0166	25.0699	37.723		0.903109		0.463085	0.727947	0.591884	0.604838	0.702209	0.59179	1.00063	0.572152	0.680789	0.478647		0.316718	0.631418	0.504014	0.491485	0.559783	0.518416	1.00089	0.497211	0.587483	0.331083
964.789	991.482	1008.61	994.641	997.647	1000.18	1004.84	1005.54	996.582	997.232	991.497	1003.08		26.6926	43.8157	29.8518	32.8574	35.3866	40.0497	40.7553	31.793	32.4429	26.7072	38.2928		0.889671		0.438492	0.84558	0.607393	0.628659	0.693605	0.599005	0.946593	0.518985	0.679589	0.50232		0.285421	0.79079	0.522863	0.522139	0.547064	0.526929	0.924514	0.434731	0.585932	0.361456
965.492	996.398	1000.55	995.761	995.887	1004.21	1002.55	1006.13	997.978	998.562	993.634	1003.14		30.9063	35.0605	30.2691	30.3951	38.7162	37.0619	40.6388	32.4862	33.0705	28.1423	37.6518		0.904817		0.516355	0.688136	0.626368	0.591448	0.771786	0.563754	0.959955	0.539328	0.704528	0.538322		0.38451	0.577481	0.545923	0.474253	0.662637	0.485341	0.9434	0.458637	0.618161	0.407649
964.842	993.817	1009.1	992.957	990.515	999.854	1004.68	1008.59	998.307	998.604	991.13	1003.13		28.975	44.2576	28.1146	25.6723	35.012	39.835	43.7484	33.4642	33.7615	26.2875	38.2882		0.889778		0.476043	0.85421	0.572115	0.491245	0.686344	0.595865	1.01623	0.54633	0.707294	0.494485		0.333208	0.802481	0.479988	0.345308	0.536331	0.523224	1.02294	0.466866	0.621735	0.351404
965.398	995.591	1005.24	991.06	994.594	999.613	1004.71	1008.75	997.601	998.905	993.899	1003.12		30.1934	39.8399	25.6616	29.1957	34.2154	39.3147	43.3521	32.2034	33.5072	28.5007	37.7255		0.90305		0.50346	0.780415	0.529987	0.567	0.680734	0.596855	1.02205	0.533589	0.712438	0.544113		0.368099	0.702502	0.42879	0.442793	0.528037	0.524391	1.03116	0.451893	0.628383	0.41508
964.352	998.117	1002.4	993.505	997.343	1002.16	1003.06	1011.12	1000.39	999.045	995.303	1003.29		33.7647	38.0468	29.1522	32.9903	37.8087	38.709	46.7659	36.0346	34.6925	30.9507	38.9377		0.874935		0.545481	0.722087	0.583333	0.620746	0.728805	0.569363	1.0682	0.57848	0.714674	0.57249		0.421576	0.623478	0.493622	0.511956	0.599099	0.491958	1.0964	0.504648	0.631273	0.451488
965.68	997.787	1001.02	989.326	996.981	1000.7	1005.75	1011.04	999.202	999.58	995.575	1003.47		32.1073	35.3447	23.6458	31.3013	35.0251	40.0695	45.3641	33.5219	33.9007	29.8955	37.7884		0.901547		0.534483	0.691206	0.487543	0.606881	0.695684	0.607302	1.0677	0.554512	0.719603	0.569793		0.407579	0.58164	0.377208	0.494114	0.550137	0.536716	1.09569	0.476481	0.637643	0.448027

## Sheet: LZ-wt3
background		WT3-LZ_n1	WT3-LZ_n2	WT3-LZ_n3	WT3-LZ_n4	WT3-LZ_n5	WT3-LZ_n6	WT3-LZ_n7	WT3-LZ_n8	WT3-LZ_n9	unfrapped nuclei			WT3-LZ_n1	WT3-LZ_n2	WT3-LZ_n3	WT3-LZ_n4	WT3-LZ_n5	WT3-LZ_n6	WT3-LZ_n7	WT3-LZ_n8	WT3-LZ_n9	unfrapped nuclei		ROI2			WT3-LZ_n1	WT3-LZ_n2	WT3-LZ_n3	WT3-LZ_n4	WT3-LZ_n5	WT3-LZ_n6	WT3-LZ_n7	WT3-LZ_n8	WT3-LZ_n9			WT3-LZ_n1	WT3-LZ_n2	WT3-LZ_n3	WT3-LZ_n4	WT3-LZ_n5	WT3-LZ_n6	WT3-LZ_n7	WT3-LZ_n8	WT3-LZ_n9
967.203		1017.35	1029.05	1006.38	1001.27	1015.13	1008.81	1017.73	1002.95	1008.85	995.953			50.1495	61.8488	39.1809	34.066	47.9324	41.607	50.5307	35.7498	41.6435	28.7503		0.993982			1.04701	1.01072	1.04231	1.00421	1.01395	0.990798	0.932219	0.992257	1.05054			1.04731	1.01146	1.05211	1.0053	1.01766	0.988296	0.923741	0.990429	1.07174
967.314		1012.38	1027.11	1002.86	1000.69	1013.36	1009.19	1024.54	1003.19	1004.47	995.719			45.0692	59.8005	35.5473	33.372	46.0444	41.8744	57.2264	35.8741	37.1596	28.4042		1.00609			0.952413	0.989151	0.957171	0.995738	0.98588	1.00931	1.06861	1.00784	0.948845			0.952111	0.988399	0.947256	0.994636	0.982121	1.01185	1.07719	1.00969	0.927384
966.634		966.938	970.634	973.754	973.657	976.648	975.677	972.705	973.567	978.437	995.6			0.30418	3.99948	7.11958	7.02238	10.0139	9.04278	6.07078	6.93248	11.8031	28.9656		0.986594			0.00630344	0.0648728	0.187992	0.20547	0.210257	0.213738	0.111165	0.190985	0.295543			0	0	0	0	0	0	0	0	0
966.648		973.532	971.482	976.28	987.357	973.374	982.69	974.156	985.108	987.687	996.108			6.88326	4.83346	9.63166	20.7084	6.72586	16.042	7.50756	18.4594	21.0386	29.4595		0.970052			0.140248	0.0770857	0.250059	0.595753	0.138852	0.372815	0.135169	0.500016	0.517962			0.134794	0.0130601	0.0764363	0.491213	-0.0904154	0.20232	0.0270066	0.381984	0.315731
966.253		971.752	972.429	976.65	987.789	973.819	989.414	977.656	983.354	983.752	996.228			5.49943	6.17623	10.3967	21.5362	7.56663	23.1615	11.4033	17.1011	17.4991	29.9752		0.953365			0.110125	0.0968062	0.265278	0.608912	0.153522	0.529014	0.201779	0.455257	0.423412			0.10448	0.0341487	0.0951796	0.507775	-0.0718396	0.400981	0.101947	0.326659	0.181513
965.256		978.402	978.063	983.652	979.753	983.944	985.092	979.645	986.2	986.242	994.899			13.1462	12.8073	18.3962	14.4979	18.6886	19.8365	14.3891	20.9445	20.9864	29.6433		0.96404			0.266196	0.202989	0.474644	0.4145	0.383424	0.458141	0.257463	0.563815	0.513475			0.261541	0.147697	0.353016	0.263086	0.219271	0.310842	0.164595	0.460844	0.309361
965.082		979.466	978.91	986.823	999.669	984.39	987.931	981.4	983.275	983.562	995.336			14.3839	13.8285	21.7413	34.5879	19.3084	22.8494	16.3188	18.1934	18.48	30.2543		0.944568			0.285376	0.214748	0.549623	0.968909	0.38814	0.517069	0.286092	0.479865	0.443019			0.280843	0.160272	0.445354	0.960869	0.225242	0.385789	0.196805	0.357077	0.209346
965.469		980.142	983.543	986.668	995.356	987.088	989.664	983.882	985.352	987.241	994.595			14.6726	18.0735	21.1993	29.8866	21.6193	24.1953	18.4133	19.8831	21.7716	29.1262		0.981155			0.302379	0.291541	0.556679	0.86964	0.451428	0.568734	0.335315	0.544746	0.542144			0.297954	0.242393	0.454043	0.835928	0.305379	0.451498	0.252184	0.437273	0.350058
964.593		981.626	996.58	989.363	1000.88	989.222	992.13	980.699	987.138	986.713	994.71			17.0325	31.9869	24.7699	36.2833	24.6284	27.5369	16.1063	22.5449	22.1198	30.1165		0.948892			0.339472	0.49901	0.629053	1.02106	0.49735	0.625998	0.283659	0.597362	0.532703			0.335282	0.464255	0.543173	1.0265	0.363527	0.524329	0.194068	0.502311	0.336656
965.109		978.634	995.982	985.167	995.169	985.724	988.514	982.365	989.443	985.857	994.422			13.5249	30.8732	20.0578	30.0594	20.615	23.4051	17.2557	24.3333	20.7476	29.3124		0.97492			0.276957	0.494848	0.523356	0.869112	0.427721	0.546662	0.312237	0.662435	0.513361			0.272371	0.459804	0.413006	0.835263	0.27536	0.423427	0.22622	0.582746	0.309199
965.028		977.93	997.128	987.383	998.567	989.917	1007.54	981.678	990.702	987.722	994.32			12.9025	32.0998	22.3556	33.5393	24.8894	42.5143	16.6498	25.674	22.6947	29.2924		0.975586			0.264391	0.514859	0.58371	0.970387	0.51676	0.993667	0.30148	0.699409	0.561923			0.259725	0.481203	0.487333	0.962729	0.388104	0.991946	0.214117	0.628448	0.378134
964.677		983.166	998.523	988.612	994.582	990.612	1006.75	984.509	992.427	990.594	993.756			18.4894	33.8461	23.9355	29.9047	25.9353	42.073	19.8317	27.7497	25.9174	29.0792		0.982739			0.381653	0.546849	0.629544	0.871572	0.542423	0.990563	0.361728	0.761498	0.646422			0.37773	0.515412	0.543778	0.838359	0.4206	0.987997	0.2819	0.705194	0.498084
964.757		988.463	998.614	989.848	995.959	990.43	1005.53	984.195	990.134	986.784	993.744			23.7059	33.8572	25.0909	31.2016	25.6733	40.7772	19.4376	25.3771	22.0271	28.9872		0.985859			0.490885	0.548765	0.66203	0.912258	0.538649	0.963104	0.355666	0.698602	0.551137			0.487655	0.517462	0.583784	0.889568	0.415822	0.953074	0.27508	0.62745	0.362824
964.524		990.193	1004.42	992.289	996.285	991.6	1004.61	982.754	992.146	988.955	992.849			25.6684	39.893	27.7645	31.7613	27.0754	40.0885	18.2302	27.622	24.4312	28.3248		1.00891			0.543954	0.661717	0.749705	0.95034	0.581352	0.968981	0.341374	0.778184	0.625586			0.541061	0.638249	0.691759	0.937497	0.469893	0.960549	0.259001	0.72582	0.468506
964.277		990.257	1005.11	990.037	997.396	994.182	1003.37	987.055	992.463	986.362	993.725			25.98	40.8296	25.76	33.1195	29.9048	39.0914	22.7784	28.1863	22.0852	29.4488		0.970406			0.529543	0.651403	0.66903	0.953155	0.617595	0.908815	0.410262	0.763773	0.543929			0.526559	0.627219	0.592406	0.94104	0.515786	0.884027	0.336505	0.708007	0.352592
964.616		991.182	1004.49	991.654	999.133	997.533	1009.41	993.764	1003.94	988.906	992.825			26.5665	39.8711	27.0383	34.517	32.9171	44.7908	29.1477	39.3199	24.2897	28.209		1.01305			0.565295	0.664066	0.733091	1.03703	0.709681	1.08708	0.548051	1.11229	0.624513			0.562537	0.640761	0.671297	1.04661	0.632388	1.11075	0.491527	1.1388	0.466984
964.458		994.018	1003.2	991.062	998.903	994.197	1010.17	996.171	1006.26	999.682	992.586			29.5598	38.7401	26.6039	34.4449	29.7384	45.7168	31.7133	41.8033	35.2237	28.1283		1.01596			0.630792	0.647081	0.723383	1.03783	0.642989	1.11274	0.598002	1.18593	0.908237			0.62845	0.622597	0.659342	1.04762	0.547941	1.14339	0.547725	1.22983	0.869739
963.831		993.699	1003.96	992.606	999.445	992.003	1011.88	994.566	1004.74	1002.58	992.913			29.8682	40.1301	28.775	35.6141	28.1716	48.0462	30.7354	40.9104	38.7516	29.0818		0.982652			0.616477	0.648322	0.756765	1.03788	0.589143	1.1311	0.560561	1.12255	0.966444			0.614044	0.623925	0.700453	1.04768	0.479758	1.16673	0.505602	1.15148	0.952366
964.128		997.574	1007	991.663	997.764	998.294	1008.49	996.112	998.354	1000.63	992.763			33.4461	42.8686	27.5353	33.6363	34.166	44.3582	31.9849	34.2268	36.4981	28.6355		0.997967			0.701083	0.703357	0.735447	0.99552	0.725637	1.06055	0.592441	0.953794	0.924428			0.699187	0.682778	0.674199	0.994361	0.652591	1.07701	0.541468	0.942886	0.892723
963.935		997.929	1005.99	993.099	997.704	999.123	1009.01	995.287	1003.78	1003.96	993.079			33.9939	42.0518	29.164	33.7694	35.1884	45.0726	31.3524	39.8435	40.0278	29.1437		0.980563			0.700139	0.677923	0.765365	0.98203	0.734318	1.05884	0.570598	1.09095	0.996149			0.698237	0.65558	0.711043	0.977382	0.663584	1.07483	0.516894	1.11242	0.994533
964.204		995.607	1007.63	993.655	997.092	996.281	1007.09	994.499	1003.5	1001.55	992.592			31.4026	43.4272	29.4511	32.8883	32.0769	42.8895	30.2948	39.2962	37.3433	28.3876		1.00668			0.663997	0.718745	0.793487	0.981882	0.687217	1.03439	0.566037	1.10463	0.954096			0.661865	0.699233	0.745676	0.977197	0.603943	1.04374	0.511762	1.12933	0.934838
964.334		996.254	1006.34	992.932	992.377	999.444	1008.44	989.286	1007.12	1003.77	993.238			31.9197	42.0077	28.5976	28.0426	35.11	44.1102	24.9516	42.787	39.4364	28.9041		0.988694			0.662871	0.682829	0.756724	0.822255	0.738758	1.04482	0.457873	1.18126	0.98957			0.660733	0.660825	0.700403	0.776289	0.669206	1.05701	0.39007	1.22405	0.985194
963.983		997.569	1009.97	991.766	991.739	992.032	1006.19	992.529	1000.78	1005.5	992.867			33.5856	45.9898	27.7829	27.7561	28.0485	42.2077	28.546	36.7989	41.5175	28.8836		0.989396			0.697961	0.748087	0.735687	0.814431	0.590593	1.00047	0.524203	1.01666	1.04253			0.696045	0.730611	0.674495	0.766441	0.481595	1.00059	0.464696	1.0206	1.06037
963.873		994.947	1009.78	993.317	990.884	992.115	1007.14	995.732	998.923	1006.3	992.804			31.0745	45.9029	29.4439	27.0115	28.2428	43.2719	31.8595	35.0498	42.4273	28.931		0.987774			0.644719	0.74545	0.778394	0.791285	0.593711	1.02401	0.584092	0.966754	1.06363			0.642465	0.727791	0.727089	0.737309	0.485543	1.03054	0.532075	0.958906	1.09032
964.084		995.605	1008.03	993.022	994.858	994.883	1008.71	999.712	999.275	1005.98	993.444			31.5211	43.9452	28.9384	30.7741	30.7987	44.6214	35.6281	35.1913	41.8925	29.3606		0.97332			0.644415	0.703215	0.753836	0.888316	0.637967	1.0405	0.643626	0.956454	1.03486			0.64216	0.682626	0.696846	0.859434	0.541581	1.0515	0.599055	0.946174	1.04948
963.951		994.016	1007.75	1000.92	997.928	999.284	1008.09	996.743	1005.98	1009.95	992.946			30.0648	43.7998	36.966	33.9771	35.3325	44.1405	32.7918	42.032	45.994	28.9947		0.985604			0.622398	0.709733	0.975103	0.993149	0.741115	1.04227	0.599863	1.15679	1.15051			0.620003	0.689596	0.969339	0.991377	0.672191	1.05376	0.549818	1.1938	1.21365
963.715		993.661	1006.79	1002.39	992.567	996.918	1009.72	994.604	1010.79	1006.25	992.9			29.9462	43.0706	38.6704	28.8515	33.2025	46.0037	30.8886	47.0721	42.5377	29.1843		0.979199			0.615915	0.693382	1.01343	0.837848	0.691912	1.07921	0.561376	1.28708	1.05714			0.613479	0.672111	1.01654	0.795914	0.609889	1.10074	0.506518	1.35486	1.08111
963.698		994.929	1005.21	1002.49	1002.84	993.201	1009.38	996.467	1013.45	1006.25	993.03			31.2318	41.5153	38.7905	39.1382	29.503	45.6873	32.7697	49.7523	42.5508	29.3319		0.974274			0.639126	0.664983	1.01147	1.13086	0.611726	1.06639	0.592568	1.35353	1.05215			0.636837	0.641741	1.01412	1.1647	0.508354	1.08444	0.541611	1.43699	1.07402
963.982		995.645	1003.23	1004.36	996.265	1000.04	1007.51	996.715	1012.21	1009.55	992.827			31.6629	39.2466	40.3741	32.2831	36.0556	43.5279	32.7329	48.226	45.5664	28.8449		0.990723			0.658888	0.639257	1.07054	0.948536	0.760212	1.03314	0.601896	1.33416	1.14574			0.656724	0.614231	1.08687	0.935227	0.696372	1.04215	0.552106	1.41304	1.20688
963.732		996.181	1007.98	1002.07	1000.02	993.722	1008.06	998.028	1011.53	1009.76	993.061			32.4493	44.2505	38.3425	36.2926	29.9901	44.3304	34.2965	47.7944	46.0265	29.3292		0.974362			0.664099	0.708859	0.999878	1.04873	0.621882	1.03482	0.620233	1.30038	1.13819			0.661969	0.688661	0.99985	1.06134	0.521214	1.04428	0.572737	1.37129	1.19617
963.659		995.049	1007.89	1002.48	999.911	995.114	1003.34	1008.53	1013.36	1013.12	992.562			31.3906	44.2264	38.8207	36.252	31.4551	39.6784	44.8665	49.7028	49.4635	28.9035		0.988715			0.651897	0.718908	1.02726	1.06299	0.661868	0.939866	0.823337	1.37222	1.2412			0.649688	0.699408	1.03357	1.07928	0.571845	0.923519	0.801242	1.46009	1.3424
963.883		996.197	1009.8	1003.96	997.932	998.216	1009.45	1004.61	1010.24	1008.76	993.177			32.3138	45.9194	40.0762	34.0484	34.333	45.5697	40.7303	46.3574	44.8776	29.2935		0.975551			0.662135	0.736491	1.04636	0.985083	0.712806	1.06504	0.737484	1.26282	1.11114			0.659992	0.71821	1.0571	0.981226	0.636345	1.08272	0.704651	1.32487	1.15776
963.765		996.112	1009.51	1004.14	1000.22	999.765	1006.99	1008.58	1009.49	1005.27	992.855			32.3472	45.7423	40.3792	36.4538	36.0005	43.2206	44.8157	45.7282	41.5037	29.0902		0.982367			0.667449	0.738775	1.06164	1.06204	0.752649	1.0172	0.817126	1.25438	1.03478			0.665339	0.720653	1.07591	1.07809	0.686795	1.02187	0.794254	1.31444	1.04937
964.32		997.253	1007.49	1006.41	995.937	1000.49	1007.91	1000.13	1010.62	1004.36	993.117			32.9332	43.1678	42.0936	31.6172	36.1675	43.586	35.8097	46.3006	40.0405	28.7974		0.992355			0.686449	0.704283	1.11797	0.930499	0.763826	1.03623	0.659556	1.283	1.00845			0.684461	0.683768	1.14528	0.912525	0.700948	1.04607	0.616977	1.34981	1.01199
963.81		996.048	1009.58	1001.97	994.514	1009.95	1007.74	1000.24	1011.64	1005.06	992.821			32.2374	45.7653	38.1608	30.7039	46.1395	43.9326	36.4264	47.8287	41.246	29.0104		0.985068			0.667013	0.74118	1.00607	0.896986	0.967272	1.0368	0.665989	1.31561	1.03118			0.664901	0.723224	1.00748	0.870346	0.958559	1.0468	0.624215	1.39012	1.04426
963.854		999.537	1009.33	1007.5	998.856	1009.35	1008.31	1002.43	1009.54	1005.91	992.589			35.6837	45.4738	43.647	35.0019	45.4955	44.454	38.5773	45.6866	42.058	28.7352		0.994505			0.745392	0.743514	1.16174	1.03234	0.962908	1.05915	0.712071	1.26873	1.06156			0.743777	0.72572	1.19918	1.04071	0.953033	1.07523	0.67606	1.33217	1.08738
963.626		996.528	1010.03	1003.32	997.639	1007.23	1006.37	1003.65	1009.39	1007.36	992.2			32.9015	46.4024	39.6893	34.013	43.5996	42.739	40.0272	45.7664	43.7365	28.574		1.00011			0.691151	0.762975	1.06235	1.00884	0.927985	1.02403	0.743	1.27811	1.11015			0.689192	0.746532	1.07679	1.01112	0.908812	1.03057	0.710858	1.34377	1.15636
963.553		997.481	1007.6	1005.37	995.868	1002.67	1009.72	1002.51	1006.94	1006.78	992.037			33.9284	44.0459	41.8219	32.315	39.1151	46.166	38.9553	43.3836	43.2289	28.4844		1.00326			0.714965	0.726506	1.12296	0.961486	0.835154	1.10962	0.725377	1.21538	1.10071			0.713156	0.707533	1.15142	0.951526	0.791267	1.13942	0.691031	1.26622	1.14297
963.734		997.98	1009.95	1003.55	997.675	1003.98	1007.46	1002.83	1009.08	1008.36	992.26			34.2459	46.2148	39.8179	33.9409	40.2427	43.7289	39.1008	45.3443	44.6272	28.5261		1.0018			0.720602	0.761168	1.06759	1.00839	0.857976	1.04951	0.727024	1.26845	1.13466			0.718829	0.744599	1.08323	1.01056	0.820164	1.06297	0.692883	1.33183	1.19115
963.507		996.037	1009.95	1005.63	995.058	1003.82	1006.54	1003.12	1006.49	1007.77	992.255			32.5303	46.4469	42.1236	31.5509	40.3156	43.036	39.6142	42.9878	44.2582	28.7481		0.994057			0.679215	0.759082	1.12068	0.93014	0.852891	1.02491	0.73088	1.19324	1.11659			0.67718	0.742368	1.14862	0.912074	0.813725	1.03168	0.697222	1.23886	1.1655
963.767		997.473	1007.88	1005.82	998.674	1007.68	1005.91	1003.21	1008.08	1007.57	991.904			33.706	44.1164	42.0527	34.9068	43.9165	42.1455	39.4462	44.3078	43.8024	28.1368		1.01566			0.719055	0.736661	1.14311	1.05144	0.949257	1.02551	0.743595	1.25661	1.1291			0.717273	0.718392	1.17624	1.06474	0.935747	1.03244	0.711527	1.31718	1.18326
963.089		996.193	1008.48	1003.55	1000.23	1005.03	1004.61	1000.06	1003.44	1007.98	991.905			33.1037	45.3958	40.4601	37.1362	41.9375	41.5159	36.9677	40.3504	44.8954	28.8163		0.991703			0.689551	0.740147	1.07388	1.09221	0.885102	0.986363	0.680438	1.11738	1.12998			0.687582	0.72212	1.09098	1.11605	0.854513	0.982656	0.640471	1.14509	1.18451
963.706		996.654	1009.97	1008.61	997.957	1005.01	1003.42	1004.36	1006.96	1009.33	991.578			32.9471	46.2663	44.9043	34.2508	41.3014	39.7168	40.6538	43.257	45.619	27.8716		1.02532			0.709552	0.77991	1.23223	1.04149	0.901225	0.975605	0.77365	1.23848	1.18711			0.70771	0.764642	1.286	1.05222	0.874927	0.968973	0.745341	1.29477	1.26561
963.544		999.026	1010.23	1005.7	999.869	1005.46	1006.03	1002.2	1004.23	1006.43	991.446			35.4813	46.6897	42.1541	36.3245	41.9169	42.4876	38.6525	40.6889	42.8888	27.9018		1.02421			0.763301	0.786195	1.15551	1.10335	0.913665	1.04254	0.734768	1.16369	1.11486			0.7618	0.771363	1.19151	1.13008	0.890679	1.0541	0.701596	1.20233	1.16304
963.469		996.993	1009.58	1007.87	1001.57	1007.86	1005.05	1000.99	1005.77	1008.67	991.297			33.5244	46.1117	44.3977	38.0961	44.3885	41.5847	37.5182	42.2987	45.1969	27.828		1.02692			0.723115	0.778521	1.22024	1.16023	0.970103	1.02309	0.715097	1.21294	1.17797			0.721359	0.763156	1.27123	1.20167	0.962144	1.02936	0.679464	1.2632	1.25263
963.457		997.85	1008.52	1004.06	999.392	1009.4	1007.79	1004.78	1004.48	1008.43	991.085			34.3922	45.0648	40.6031	35.9345	45.9441	44.3296	41.3274	41.0268	44.9765	27.628		1.03436			0.747202	0.766352	1.12402	1.10232	1.01137	1.09851	0.793401	1.18498	1.18071			0.745599	0.750143	1.15274	1.12878	1.01439	1.12529	0.767562	1.22865	1.25652
963.264		997.12	1010.08	1003.81	1000.28	1007.83	1006.19	1004.23	1001.86	1006.29	990.791			33.8568	46.8188	40.5495	37.0161	44.5696	42.9262	40.9669	38.5976	43.0295	27.527		1.03815			0.738272	0.799104	1.12666	1.13967	0.984715	1.06764	0.789369	1.11891	1.13375			0.736612	0.785167	1.15599	1.17579	0.980645	1.08603	0.763026	1.14698	1.18986
962.962		998.551	1010.85	1003.8	998.557	1007.8	1007.25	1003.46	1002.38	1004.84	990.819			35.5891	47.8863	40.837	35.5948	44.839	44.288	40.5026	39.4169	41.8755	27.8572		1.02585			0.766846	0.807635	1.1212	1.08292	0.978922	1.08845	0.771171	1.12911	1.09026			0.765367	0.79429	1.14926	1.10436	0.973311	1.1125	0.742551	1.1596	1.12813
962.961		998.259	1008.37	1001.06	999.644	1006.06	1003.07	1003.79	1002.84	1005.43	990.559			35.2975	45.4084	38.0978	36.6825	43.1027	40.1084	40.8322	39.8747	42.4702	27.5982		1.03548			0.767703	0.773033	1.05581	1.12649	0.949849	0.994986	0.784744	1.15295	1.11612			0.766229	0.757287	1.06873	1.1592	0.936498	0.993623	0.757823	1.18906	1.16484
963.633		997.1	1009.85	1004.65	1000.96	1006.95	1004.04	1004.1	999.336	1003.03	990.532			33.4674	46.2129	41.0179	37.3281	43.3144	40.407	40.464	35.7034	39.3973	26.8992		1.06238			0.746814	0.807172	1.16628	1.1761	0.979318	1.02844	0.797876	1.05917	1.06227			0.745208	0.793795	1.20477	1.22164	0.973812	1.03617	0.772597	1.07313	1.0884
963.036		999.033	1009.21	1004.41	998.428	1004.66	1004.07	1002.76	997.827	1000.18	990.224			35.9969	46.1738	41.3708	35.3913	41.6203	41.0309	39.7277	34.7904	37.1449	27.1876		1.05112			0.794737	0.797933	1.16383	1.10325	0.931032	1.03324	0.775047	1.02113	0.990915			0.793435	0.783915	1.20176	1.12995	0.91267	1.04228	0.746912	1.02612	0.987104
963.232		997.319	1008.79	1003.81	998.751	1005.39	1011.84	1000.98	998.996	1000.38	990.465			34.0866	45.5532	40.5752	35.5187	42.1558	48.6057	37.75	35.7641	37.1443	27.2327		1.04937			0.751315	0.785905	1.13956	1.10538	0.941449	1.22196	0.735244	1.04797	0.989258			0.749737	0.771052	1.17187	1.13264	0.925861	1.2823	0.702132	1.0593	0.984751
963.008		999.681	1008.73	997.731	1000.32	1007.01	1007.07	999.883	1000.42	1004.34	990.145			36.673	45.725	34.7232	37.3075	44.0003	44.0641	36.8755	37.4149	41.3295	27.1373		1.05306			0.811162	0.79164	0.97863	1.16513	0.986093	1.11168	0.720735	1.1002	1.10459			0.809964	0.777185	0.973683	1.20784	0.982391	1.14204	0.685807	1.12385	1.14847
963.059		999.554	1007.2	1004.85	998.937	1006.4	1006.83	1002.17	996.832	1004.16	990.086			36.4954	44.1393	41.7871	35.8778	43.3424	43.7742	39.1116	33.773	41.1035	27.0269		1.05736			0.810532	0.767309	1.18253	1.12506	0.975318	1.10888	0.767563	0.997163	1.10304			0.809331	0.751166	1.22479	1.1574	0.968747	1.13847	0.738493	0.996494	1.14626
963.381		999.625	1007.79	999.73	997.863	1004.8	1007.8	1001.47	997.5	1000.67	989.507			36.2449	44.4088	36.3498	34.4826	41.4193	44.4151	38.0872	34.1192	37.2923	26.1266		1.0938			0.832709	0.798597	1.06411	1.11857	0.964162	1.16388	0.773217	1.0421	1.03525			0.831647	0.784625	1.07895	1.14924	0.954621	1.20843	0.744854	1.05204	1.05004
963.218		996.892	1008.59	1001.06	997.32	1003.82	1011.8	1002.13	999.918	1000.38	989.227			33.674	45.3681	37.8413	34.1019	40.6047	48.582	38.9099	36.7008	37.1644	26.0095		1.09872			0.777127	0.819521	1.11276	1.1112	0.949455	1.27881	0.793476	1.126	1.03634			0.775713	0.807001	1.13886	1.13996	0.935999	1.3546	0.767646	1.15574	1.05159
962.972		998.805	1008.78	1001.29	996.36	1007.77	1012.19	1001.85	996.212	1002.49	989.367			35.8333	45.8128	38.3147	33.3885	44.7943	49.2211	38.8789	33.2407	39.5157	26.3958		1.08264			0.814857	0.815443	1.11019	1.07204	1.03209	1.27667	0.78124	1.00491	1.08578			0.813682	0.80264	1.1357	1.09066	1.04064	1.35188	0.75388	1.00607	1.12177
963.216		997.008	1007.54	1001.4	1001.74	1006.81	1008.32	1002.37	996.857	1003.58	989.257			33.7913	44.3236	38.1865	38.5201	43.5894	45.0991	39.154	33.6408	40.3617	26.0403		1.09742			0.778909	0.799704	1.12158	1.25368	1.01804	1.18572	0.797507	1.03089	1.12417			0.777507	0.785809	1.14973	1.31928	1.02284	1.23621	0.772181	1.03818	1.17626
963.008		998.508	1010.03	998.329	997.308	1004.84	1013.31	1004.78	998.213	1003.28	989.269			35.5006	47.0195	35.3209	34.3002	41.8353	50.3035	41.7744	35.2056	40.2737	26.2615		1.08818			0.81142	0.841202	1.02868	1.10694	0.968844	1.31142	0.843716	1.06976	1.11227			0.810223	0.830186	1.03532	1.1346	0.960549	1.39607	0.82417	1.08623	1.15937
963.179		999.698	1009.02	998.734	998.641	1008.3	1008.92	1004.33	996.562	1001.83	988.954			36.5192	45.8383	35.5548	35.4618	45.1244	45.742	41.1463	33.3825	38.6517	25.7752		1.10871			0.85045	0.835543	1.05503	1.16602	1.06473	1.215	0.84671	1.0335	1.08761			0.849501	0.824134	1.06777	1.20895	1.08197	1.27344	0.827538	1.04141	1.12437
963.13		995.616	1010.8	1000.42	999.889	1004.36	1014.93	1004.32	997.911	1002.97	988.709			32.4854	47.6676	37.2907	36.7588	41.2307	51.7948	41.1851	34.7809	39.8382	25.5781		1.11725			0.762339	0.87558	1.11506	1.21798	0.980351	1.38637	0.854036	1.08509	1.12964			0.760831	0.866948	1.1417	1.27435	0.97512	1.4914	0.835781	1.10517	1.18402
963.019		996.374	1010.55	998.976	996.026	1002.18	1008.78	1003.78	995.778	1000.06	988.691			33.3549	47.5302	35.9569	33.0066	39.1579	45.7561	40.7649	32.7587	37.0382	25.6712		1.1132			0.779907	0.869892	1.07128	1.08969	0.927692	1.22029	0.842259	1.0183	1.04643			0.778511	0.860866	1.08778	1.11288	0.908441	1.28018	0.822531	1.02262	1.06592
963.233		995.556	1009.57	997.799	1000.79	1006.68	1007.76	1005.62	995.941	1000.34	988.701			32.3226	46.3317	34.5657	37.5535	43.4497	44.5284	42.3908	32.7073	37.1088	25.468		1.12209			0.761801	0.854724	1.03805	1.24969	1.03758	1.19703	0.882842	1.02481	1.0568			0.76029	0.844646	1.04686	1.31427	1.04759	1.25059	0.868189	1.03067	1.08062
962.592		999.63	1009.53	999.929	1000.12	1004.38	1011.57	1002.88	997.862	999.547	988.432			37.0381	46.9352	37.3367	37.5286	41.7862	48.9728	40.2837	35.2692	36.9547	25.8393		1.10596			0.860392	0.853411	1.10515	1.23091	0.983515	1.29758	0.826901	1.0892	1.03728			0.859507	0.843241	1.1295	1.29063	0.979126	1.37848	0.805252	1.11026	1.05292
962.942		997.115	1007.02	996.92	997.631	1004.82	1007.26	1004.19	996.082	999.478	988.403			34.1726	44.0755	33.9781	34.6887	41.8809	44.317	41.2458	33.1395	36.5356	25.4607		1.12241			0.805632	0.813333	1.02069	1.15469	1.00041	1.19169	0.859241	1.03865	1.04077			0.804399	0.800384	1.02549	1.19469	1.00051	1.24379	0.841636	1.04777	1.05787
962.622		996.974	1008.69	998.814	996.25	1005.42	1005.2	1004.42	996.315	999.177	988.817			34.3522	46.0661	36.1927	33.6288	42.7966	42.5779	41.8014	33.6935	36.5556	26.1952		1.09094			0.787157	0.82623	1.05673	1.08802	0.993613	1.11282	0.846397	1.0264	1.01214			0.785807	0.814175	1.06987	1.11078	0.991913	1.14349	0.827186	1.03263	1.01723
962.73		998.915	1006.64	996.031	996.842	1003.14	1008.82	1003.8	995.366	1001.84	988.25			36.1857	43.9071	33.3014	34.1124	40.4095	46.0911	41.074	32.636	39.1102	25.5206		1.11977			0.85109	0.808325	0.998019	1.13284	0.962993	1.23648	0.853654	1.02047	1.1115			0.850145	0.795028	0.997561	1.16719	0.95314	1.30077	0.835351	1.0253	1.15827
962.951		995.208	1007.88	997.796	994.781	1006.33	1005.12	1004.16	994.631	998.718	987.675			32.2571	44.9253	34.845	31.83	43.3752	42.1712	41.2049	31.6796	35.767	24.7242		1.15584			0.783127	0.853711	1.07792	1.09109	1.06696	1.16777	0.883959	1.02247	1.04923			0.781752	0.843562	1.09596	1.11465	1.08479	1.21337	0.869446	1.02778	1.06988
963.211		996.484	1008.56	999.308	1001.74	1004.55	1005.26	1004.6	996.204	996.79	988.111			33.2734	45.3452	36.0975	38.5273	41.3368	42.0521	41.3942	32.9935	33.5793	24.8998		1.14769			0.802102	0.855611	1.10879	1.31135	1.00965	1.15625	0.881756	1.05737	0.9781			0.800847	0.845594	1.13397	1.39187	1.01222	1.19873	0.866967	1.07091	0.968912
962.565		998.396	1011.21	995.451	1002.13	1010.08	1007.57	1006.21	997.545	1000.3	987.889			35.8314	48.6486	32.8862	39.5666	47.5114	45.0078	43.647	34.9804	37.74	25.3246		1.12844			0.849278	0.902545	0.993202	1.32414	1.141	1.21676	0.914148	1.10224	1.08085			0.848322	0.895784	0.991628	1.40796	1.17854	1.27569	0.903411	1.12637	1.11477
962.812		995.557	1008.62	995.976	997.88	1005.35	1006.73	1005.68	998.881	999.217	987.402			32.7442	45.8073	33.1633	35.0678	42.5405	43.9126	42.8641	36.0685	36.4049	24.5892		1.16219			0.799316	0.875249	1.03153	1.20868	1.05217	1.22266	0.924601	1.17051	1.0738			0.798043	0.866594	1.03882	1.26264	1.06607	1.28319	0.915171	1.21077	1.10476
962.823		996.641	1008.47	997.14	999.04	1002.76	1010.7	1006.29	997.771	998.476	987.943			33.8183	45.6469	34.3172	36.2174	39.9382	47.8765	43.4625	34.9481	35.6536	25.1201		1.13763			0.80809	0.853752	1.04486	1.22192	0.966936	1.30486	0.917697	1.11019	1.02942			0.806873	0.843607	1.05524	1.27931	0.958133	1.38773	0.907403	1.1362	1.04176
963.213		997.604	1010.13	995.766	1001.06	1007.8	1003.85	1004	995.749	999.921	987.651			34.3907	46.9148	32.5527	37.8433	44.5903	40.6404	40.7829	32.536	36.7075	24.4379		1.16938			0.844707	0.90196	1.0188	1.31242	1.1097	1.13856	0.885155	1.06241	1.08943			0.843722	0.895159	1.02316	1.39321	1.13891	1.17623	0.870792	1.07715	1.12695
962.868		998.16	1009.75	995.773	998.787	1003.75	1005.57	1004.48	998.225	997.952	987.616			35.2921	46.879	32.9043	35.9184	40.8806	42.7057	41.6138	35.3564	35.0841	24.7479		1.15473			0.855988	0.889982	1.01691	1.23006	1.00464	1.18143	0.891875	1.14005	1.0282			0.855075	0.88235	1.02082	1.28955	1.00587	1.23075	0.878352	1.17311	1.04004
962.923		997.819	1011.46	995.667	998.81	1005.01	1009.47	1006.05	996.107	999.298	987.509			34.8961	48.5415	32.7438	35.8866	42.0839	46.5426	43.1237	33.1841	36.3747	24.5854		1.16237			0.851978	0.927635	1.01863	1.23709	1.04104	1.29609	0.930345	1.07708	1.07307			0.851039	0.922615	1.02295	1.2984	1.05197	1.37658	0.921633	1.09527	1.10373
962.747		996.639	1007.77	995.188	1000.95	1004.16	1005.98	1004.83	999.093	996.638	987.401			33.8929	45.0256	32.4412	38.205	41.4144	43.2304	42.0806	36.3461	33.8919	24.6545		1.15911			0.825164	0.858033	1.00639	1.31332	1.02161	1.20048	0.905295	1.1764	0.997026			0.824055	0.848184	1.00787	1.39434	1.02736	1.25497	0.89345	1.21804	0.995779
962.409		998.594	1008.08	995.055	996.787	1003.94	1004.75	1005.58	997.517	996.901	986.849			36.1852	45.6714	32.6467	34.3784	41.5265	42.3426	43.1722	35.1086	34.4922	24.4406		1.16925			0.888685	0.877958	1.02163	1.19212	1.03334	1.18612	0.936909	1.14629	1.02357			0.887979	0.869492	1.02664	1.2418	1.04222	1.23671	0.929018	1.18083	1.03346
962.751		997.923	1008.55	996.961	994.242	1006.05	1005.41	1007.03	996.451	996.743	987.374			35.1722	45.7938	34.2094	31.4908	43.3001	42.662	44.2792	33.7001	33.9917	24.6226		1.16061			0.85742	0.873803	1.06262	1.08392	1.06951	1.18623	0.953829	1.09217	1.00126			0.856516	0.865048	1.07712	1.10562	1.08801	1.23685	0.948054	1.11393	1.00179
962.726		996.371	1008.95	997.027	994.015	1010.08	1009.68	1008.06	996.934	997.1	987.042			33.645	46.2197	34.3006	31.2892	47.3538	46.9584	45.3322	34.2082	34.3741	24.3154		1.17528			0.830555	0.893074	1.07892	1.09059	1.18441	1.32219	0.988851	1.12264	1.02532			0.82948	0.885656	1.09719	1.11401	1.23351	1.40977	0.987457	1.1516	1.03594
962.31		999.27	1009.22	996.548	998.942	1002.82	1005.6	1006.99	996.241	998.831	987.444			36.9603	46.9101	34.2378	36.6323	40.5106	43.2896	44.6812	33.9313	36.5208	25.1341		1.13699			0.882673	0.876887	1.04186	1.23523	0.980244	1.17918	0.9429	1.07728	1.05386			0.881929	0.868346	1.05155	1.29606	0.974985	1.22789	0.935759	1.09553	1.07646
962.217		997.659	1008.8	994.83	995.969	1004.3	1005.36	1009.03	997.165	997.126	987.092			35.442	46.586	32.6132	33.7521	42.0784	43.1402	46.8155	34.9476	34.9088	24.8753		1.14882			0.855223	0.879891	1.00275	1.14995	1.02878	1.18734	0.998222	1.1211	1.01783			0.854304	0.871559	1.00339	1.18873	1.03644	1.23827	0.997999	1.14968	1.02531
962.763		996.898	1007.73	995.351	995.467	1008.67	1004.02	1004.15	999.017	998.93	987.048			34.1346	44.9644	32.5883	32.7039	45.9119	41.261	41.3873	36.2543	36.1667	24.2854		1.17673			0.843682	0.869892	1.02632	1.1413	1.14977	1.1632	0.903914	1.19126	1.08012			0.84269	0.860866	1.03242	1.17785	1.18964	1.20757	0.891897	1.23642	1.11373

## Sheet: LZ-4pm1
background		LZ_4pm1_n1	LZ_4pm1_n2	LZ_4pm1_n3	LZ_4pm1_n4	LZ_4pm1_n5	unfrapped nuclei			LZ_4pm1_n1	LZ_4pm1_n2	LZ_4pm1_n3	LZ_4pm1_n4	LZ_4pm1_n5	unfrapped nuclei		ROI2			LZ_4pm1_n1	LZ_4pm1_n2	LZ_4pm1_n3	LZ_4pm1_n4	LZ_4pm1_n5		LZ_4pm1_n1	LZ_4pm1_n2	LZ_4pm1_n3	LZ_4pm1_n4	LZ_4pm1_n5
968.627		1006.64	1005.44	1006.83	989.656	1011.3	992.311			38.0119	36.8105	38.2063	21.029	42.673	23.684		1.01627			1.028	1.02544	1.01853	1.20022	1.02562		1.03678	1.03382	1.0214	1.35494	1.03465
968.247		1005.39	1004.4	1006.28	982.83	1010.14	992.702			37.1445	36.1525	38.0369	14.583	41.8953	24.4548		0.98424			0.972881	0.975364	0.982053	0.806087	0.975189		0.964383	0.967242	0.979279	0.656251	0.966446
967.133		975.375	975.449	971.826	974.268	977.262	989.261			8.24293	8.31613	4.69313	7.13553	10.1296	22.1285		1.08771			0.238594	0.247949	0.133907	0.435886	0.260573		0	0	0	0	0
967.453		974.997	973.385	973.709	973.173	977.843	990.933			7.54428	5.93218	6.25558	5.71958	10.3901	23.4801		1.0251			0.205802	0.16669	0.168214	0.32928	0.251888		-0.0430677	-0.10805	0.0396113	-0.188981	-0.0117448
966.335		975.75	973.661	972.712	971.064	982.224	989.727			9.41518	7.32618	6.37678	4.72948	15.8894	23.3919		1.02896			0.257806	0.206636	0.17212	0.273305	0.38666		0.0252328	-0.0549337	0.0441204	-0.288206	0.170521
967.26		977.975	975.927	975.8	973.971	979.854	990.933			10.7151	8.66707	8.54027	6.71037	12.5934	23.6733		1.01673			0.289912	0.24155	0.227776	0.383167	0.302811		0.0673998	-0.00850821	0.108382	-0.0934556	0.057123
966.12		975.747	979.05	976.589	974.236	982.549	990.389			9.6273	12.9297	10.4689	8.1163	16.4292	24.2694		0.991761			0.254083	0.351498	0.272356	0.452063	0.385341		0.020343	0.137689	0.159854	0.028676	0.168737
966.391		977.174	978.951	976.569	973.407	982.029	989.683			10.7833	12.5599	10.1785	7.01609	15.6378	23.2924		1.03336			0.296529	0.355766	0.275908	0.407174	0.382163		0.0760895	0.143364	0.163955	-0.0508976	0.164439
965.943		978.54	977.91	976.008	973.164	982.486	989.978			12.5967	11.9665	10.0647	7.22072	16.5428	24.0347		1.00144			0.335698	0.32849	0.264397	0.406107	0.391795		0.127532	0.107095	0.150665	-0.0527886	0.177464
966.111		978.736	978.281	976.909	977.242	984.048	990.327			12.6248	12.1695	10.7975	11.1313	17.9372	24.216		0.993947			0.333928	0.331562	0.281525	0.621361	0.421639		0.125208	0.11118	0.17044	0.328789	0.217826
966.126		976.433	977.071	975.809	975.844	983.172	990.5			10.3075	10.9453	9.68327	9.71867	17.0458	24.3743		0.987494			0.270863	0.29627	0.250833	0.538983	0.398083		0.0423819	0.0642531	0.135004	0.182758	0.185968
966.652		977.66	978.506	977.458	974.569	985.352	989.578			11.0081	11.8535	10.8055	7.91734	18.6999	22.9262		1.04987			0.307548	0.341122	0.297584	0.466818	0.464299		0.0905618	0.123893	0.188983	0.054833	0.275518
965.458		976.77	980.261	976.895	975.625	982.974	988.723			11.3127	14.8035	11.4373	10.168	17.5169	23.2659		1.03454			0.311441	0.419796	0.310383	0.590765	0.428574		0.0956751	0.228504	0.203761	0.274553	0.227204
966.023		977.839	976.552	977.699	976.882	983.479	988.793			11.8155	10.5282	11.6753	10.859	17.456	22.7694		1.0571			0.332375	0.305066	0.32375	0.644668	0.436396		0.123169	0.0759489	0.219194	0.370106	0.237782
965.747		979.203	977.367	976.939	976.345	983.575	989.167			13.4562	11.6206	11.192	10.5986	17.8286	23.4197		1.02774			0.368019	0.327371	0.301731	0.611739	0.433335		0.169982	0.105607	0.193771	0.311733	0.233644
965.638		979.843	976.525	978.419	974.25	985.267	989.219			14.2048	10.8872	12.7811	8.61162	19.629	23.5809		1.02072			0.385839	0.304614	0.342219	0.493656	0.473835		0.193386	0.0753481	0.240518	0.102408	0.288415
966.006		979.912	975.765	978.104	976.101	984.832	989.024			13.9053	9.75855	12.0977	10.0951	18.826	23.0174		1.04571			0.386948	0.279719	0.331848	0.592866	0.465574		0.194843	0.0422453	0.228545	0.278276	0.277244
965.914		978.66	975.438	976.002	977.564	983.043	988.313			12.7461	9.52382	10.0881	11.6495	17.1289	22.3986		1.07459			0.364491	0.280532	0.28437	0.70305	0.435308		0.165348	0.0433264	0.173726	0.473599	0.236312
965.452		979.519	974.048	975.983	976.816	982.89	988.245			14.0674	8.59572	10.5311	11.3645	17.4384	22.7931		1.056			0.395313	0.248813	0.29172	0.673981	0.435504		0.205829	0.00114873	0.182212	0.422068	0.236577
966.337		981.457	975.072	976.332	976.675	985.35	988.575			15.1199	8.73456	9.99416	10.3376	19.0124	22.238		1.08236			0.435494	0.259143	0.283756	0.62838	0.486664		0.258601	0.0148847	0.173017	0.341232	0.305765
964.986		980.447	975.244	974.33	978.283	981.911	988.393			15.4612	10.2584	9.34366	13.2973	16.9253	23.4076		1.02827			0.423073	0.289144	0.252032	0.767901	0.411592		0.242288	0.0547776	0.136388	0.58856	0.204238
965.64		979.239	974.613	979.592	978.708	981.638	987.95			13.5982	8.97292	13.9521	13.0672	15.998	22.3096		1.07888			0.390409	0.26536	0.39486	0.791754	0.40819		0.199388	0.0231512	0.301298	0.630845	0.199637
965.408		981.127	973.274	978.756	975.901	985.085	988.373			15.7197	7.86611	13.3487	10.4935	19.6771	22.9657		1.04806			0.438425	0.225982	0.36699	0.617648	0.487719		0.26245	-0.0292092	0.26912	0.322207	0.307193
964.82		979.519	974.927	977.3	979.109	983.28	987.497			14.6992	10.1071	12.4801	14.2884	18.4599	22.6765		1.06143			0.41519	0.294064	0.347485	0.851738	0.463384		0.231934	0.0613198	0.246599	0.737177	0.274281
965.119		979.198	976.712	975.069	981.442	982.665	986.959			14.0785	11.5922	9.95012	16.323	17.5459	21.8394		1.10211			0.412901	0.350202	0.287662	1.01032	0.457323		0.228928	0.135966	0.177526	1.01829	0.266085
964.671		977.471	973.338	975.725	978.255	981.5	986.568			12.8008	8.66727	11.0541	13.5847	16.8294	21.8973		1.0992			0.374435	0.261147	0.318733	0.838607	0.437488		0.178408	0.0175501	0.213402	0.7139	0.23926
964.827		978.817	973.435	976.33	977.853	983.681	986.57			13.9901	8.6077	11.5035	13.0262	18.8545	21.7433		1.10698			0.412122	0.261189	0.334041	0.809827	0.493603		0.227905	0.0176058	0.231076	0.662881	0.31515
965.313		977.775	975.423	975.444	979.871	981.484	987.78			12.4624	10.1099	10.1313	14.5586	16.1708	22.467		1.07132			0.355294	0.29689	0.284719	0.875942	0.409709		0.153269	0.0650778	0.174128	0.780083	0.201692
965.034		977.81	975.324	978.174	981.217	982.915	987.864			12.7758	10.2894	13.1401	16.1831	17.8803	22.8291		1.05433			0.35845	0.297367	0.363416	0.958235	0.445835		0.157414	0.065712	0.264993	0.925963	0.250548
963.997		978.048	976.928	980.073	979.384	979.75	986.971			14.0506	12.9308	16.0758	15.3864	15.7532	22.9741		1.04768			0.391729	0.371346	0.441802	0.90531	0.390317		0.201121	0.164082	0.355499	0.832144	0.175466
964.702		977.916	976.98	980.456	978.009	982.962	986.284			13.2144	12.2786	15.7541	13.3072	18.2608	21.5822		1.11524			0.392178	0.37536	0.460886	0.833473	0.48163		0.201711	0.169418	0.377533	0.7048	0.298957
964.896		980.518	978.157	979.149	977.057	981.643	986.567			15.6219	13.2603	14.2522	12.1602	16.7463	21.671		1.11068			0.461727	0.403708	0.415239	0.75851	0.439874		0.293054	0.207113	0.324828	0.571913	0.242487
964.974		979.16	976.48	977.976	976.985	982.594	986.729			14.1856	11.5058	13.0019	12.0102	17.6196	21.7545		1.10641			0.417667	0.34895	0.377359	0.746282	0.461038		0.235188	0.134301	0.281092	0.550236	0.271109
965.265		978.674	976.898	980.506	978.409	982.753	986.481			13.409	11.6334	15.2407	13.1436	17.4884	21.2156		1.13451			0.404827	0.361779	0.453569	0.837447	0.469226		0.218325	0.15136	0.369085	0.711844	0.282182
964.648		979.151	976.072	979.216	978.957	981.323	986.267			14.503	11.424	14.5672	14.3086	16.6744	21.6186		1.11337			0.429694	0.348644	0.425444	0.894681	0.439046		0.250983	0.133895	0.336611	0.813302	0.241367
965.367		980.132	976.986	978.428	978.803	981.185	986.006			14.7646	11.6191	13.0607	13.4363	15.8179	20.6385		1.16624			0.45822	0.37144	0.399562	0.880039	0.436274		0.288448	0.164205	0.306727	0.787345	0.237618
965.544		981.189	974.405	976.399	979.207	980.912	986.544			15.6449	8.86069	10.8544	13.6622	15.3679	21.0001		1.14616			0.47718	0.278381	0.326347	0.879426	0.416564		0.313349	0.0404663	0.222193	0.78626	0.210963
964.936		980.505	976.991	975.945	979.223	982.607	986.113			15.569	12.0554	11.0091	14.2876	17.6717	21.1772		1.13657			0.470892	0.375583	0.328229	0.911989	0.475004		0.305091	0.169714	0.224366	0.843984	0.289997
964.67		979.87	978.447	975.117	978.94	983.351	985.27			15.1996	13.7771	10.4468	14.2702	18.6815	20.5999		1.16842			0.472603	0.44125	0.320193	0.936405	0.516219		0.307338	0.257032	0.215087	0.887265	0.345736
964.524		981.36	977.191	979.062	979.001	983.62	985.21			16.8359	12.6665	14.5373	14.4764	19.0953	20.6851		1.16361			0.521326	0.404011	0.443733	0.946026	0.525482		0.371329	0.207515	0.357728	0.90432	0.358262
964.523		979.357	976.153	980.335	977.46	980.907	985.067			14.8338	11.6298	15.8116	12.9368	16.3839	20.5439		1.17161			0.462487	0.373493	0.485945	0.851223	0.453965		0.294052	0.166936	0.406467	0.736265	0.261543
963.927		980.134	976.412	979.613	976.875	982.794	984.855			16.2064	12.485	15.6858	12.9472	18.8666	20.9278		1.15012			0.496012	0.393602	0.473235	0.836279	0.513166		0.338083	0.193675	0.391792	0.709773	0.341607
964.637		979.671	978.043	980.864	978.225	982.777	984.703			15.0332	13.4054	16.2263	13.5874	18.1395	20.0657		1.19953			0.479873	0.440776	0.510575	0.915336	0.514587		0.316886	0.256402	0.434904	0.849918	0.343528
964.531		979.455	978.268	980.473	978.232	983.497	985.187			14.9238	13.7364	15.9414	13.7009	18.9656	20.6552		1.1653			0.462787	0.438771	0.487296	0.896645	0.522669		0.294446	0.253736	0.408027	0.816783	0.354458
964.787		980.962	978.078	976.928	979.035	982.973	984.991			16.175	13.2906	12.1411	14.2481	18.1861	20.2042		1.19131			0.51278	0.434005	0.379411	0.953264	0.512371		0.360105	0.247398	0.283461	0.917152	0.340532
963.624		979.44	978.221	976.64	978.615	982.46	984.894			15.816	14.597	13.0158	14.991	18.8358	21.2699		1.13162			0.476278	0.452783	0.386366	0.952716	0.504088		0.312164	0.272368	0.291491	0.916181	0.329329
964.656		980.761	977.292	975.577	979.089	983.816	985.844			16.1051	12.6357	10.9207	14.433	19.1599	21.1875		1.13602			0.486872	0.39347	0.325437	0.920827	0.514758		0.326079	0.193499	0.221143	0.859651	0.343759
964.085		979.96	977.804	977.33	977.351	983.625	985.045			15.8748	13.7184	13.2444	13.2657	19.54	20.9598		1.14836			0.48512	0.431825	0.398968	0.855541	0.53067		0.323778	0.2445	0.306042	0.743919	0.365278
963.899		980.855	978.896	979.479	978.521	982.659	984.572			16.956	14.9972	15.58	14.6221	18.7598	20.673		1.16429			0.525353	0.478632	0.475839	0.956109	0.516552		0.376618	0.306739	0.394798	0.922195	0.346186
964.548		979.769	975.406	980.065	978.297	982.27	984.808			15.2211	10.8587	15.5177	13.7492	17.722	20.2601		1.18802			0.48121	0.353614	0.483593	0.91735	0.49792		0.318642	0.140502	0.403751	0.853487	0.320988
964.173		981.011	977.203	980.291	977.828	984.677	984.387			16.8381	13.0301	16.1184	13.6549	20.5041	20.2137		1.19075			0.533552	0.425299	0.503466	0.913149	0.577408		0.387386	0.235822	0.426697	0.84604	0.428487
963.96		983.359	978.498	980.69	978.856	982.788	984.858			19.3985	14.5376	16.7304	14.8964	18.8277	20.8976		1.15178			0.594568	0.458976	0.505481	0.963574	0.512849		0.467523	0.280602	0.429023	0.935427	0.341177
964.183		982.055	977.49	979.114	979.106	984.46	985.063			17.8724	13.3069	14.9308	14.9235	20.2773	20.8799		1.15276			0.548258	0.420477	0.451492	0.966146	0.552803		0.406701	0.229411	0.366687	0.939987	0.395212
964.389		981.579	977.387	980.321	976.453	981.416	985.046			17.1895	12.9973	15.9317	12.064	17.0268	20.6563		1.16523			0.533016	0.415139	0.486972	0.789474	0.469211		0.386682	0.222312	0.407652	0.626803	0.282162
964.157		982.191	975.513	980.203	978.177	984.004	985.042			18.0341	11.3565	16.0466	14.0201	19.8471	20.8857		1.15244			0.553066	0.358749	0.485099	0.90741	0.540926		0.413015	0.147331	0.40549	0.835866	0.379149
964.337		981.579	976.797	980.626	976.803	983.97	985.26			17.2418	12.4596	16.2886	12.4653	19.632	20.9226		1.15041			0.527836	0.392902	0.491547	0.805358	0.53412		0.379879	0.192744	0.412935	0.65496	0.369945
964.592		980.624	976.114	980.87	976.439	985.54	985.343			16.0318	11.5224	16.2782	11.8473	20.9488	20.751		1.15992			0.494848	0.366349	0.495291	0.771752	0.574655		0.336554	0.157437	0.417258	0.595387	0.424764
963.678		980.754	977.146	979.761	977.376	981.773	984.575			17.0758	13.4676	16.0831	13.6979	18.0943	20.8963		1.15185			0.523409	0.42522	0.485953	0.886102	0.492902		0.374065	0.235717	0.406476	0.798094	0.314201
963.492		981.057	976.023	978.988	977.104	984.43	984.974			17.5651	12.5309	15.4968	13.6126	20.9384	21.4824		1.12043			0.52372	0.384852	0.455465	0.856563	0.554818		0.374473	0.18204	0.371274	0.745731	0.397936
963.263		982.222	977.994	980.001	976.422	984.259	985.04			18.9588	14.7312	16.7381	13.1589	20.9958	21.7769		1.10528			0.557628	0.446308	0.485294	0.816813	0.548813		0.419007	0.263758	0.405715	0.675266	0.389816
963.815		983.158	977.927	976.26	977.416	982.433	984.965			19.3428	14.1117	12.445	13.6008	18.6178	21.1503		1.13802			0.585778	0.440206	0.371512	0.869256	0.501072		0.455978	0.255644	0.274341	0.768231	0.325251
963.709		982.024	979.435	978.684	977.05	982.668	984.772			18.3156	15.7257	14.9752	13.3414	18.9587	21.0631		1.14273			0.556967	0.492586	0.448896	0.856209	0.51236		0.418139	0.325293	0.36369	0.745103	0.340517
964.558		981.596	977.212	976.091	977.59	984.56	985.132			17.0385	12.6545	11.533	13.0328	20.0023	20.5747		1.16986			0.530431	0.405794	0.35392	0.856259	0.553396		0.383287	0.209887	0.254029	0.745192	0.396013
963.761		981.82	976.464	978.224	977.997	985.571	984.939			18.0593	12.7031	14.4632	14.2359	21.8102	21.1785		1.1365			0.546179	0.395737	0.431185	0.908634	0.586209		0.40397	0.196514	0.34324	0.838035	0.440389
964.173		980.329	975.317	977.095	977.888	983.43	985.262			16.1564	11.1438	12.9225	13.7153	19.2572	21.0894		1.1413			0.490693	0.348627	0.38688	0.879103	0.519776		0.331097	0.133872	0.292085	0.785688	0.350547
964.346		982.125	976.872	977.224	977.482	985.506	984.922			17.7793	12.5267	12.8786	13.1363	21.1602	20.5767		1.16974			0.553438	0.401656	0.395174	0.862973	0.585373		0.413504	0.204384	0.301661	0.757093	0.439259
964.191		981.441	976.774	976.339	978.453	984.745	985.464			17.2503	12.5836	12.1479	14.2621	20.5538	21.273		1.13145			0.519395	0.390274	0.360551	0.906263	0.549986		0.368793	0.189249	0.261686	0.833833	0.391402
963.914		982.352	977.887	978.117	979.035	985.371	984.929			18.438	13.9732	14.2034	15.1209	21.4569	21.0148		1.14535			0.561977	0.438697	0.426739	0.972641	0.581206		0.424719	0.253637	0.338107	0.951501	0.433624
964.154		980.836	976.13	976.605	977.222	985.37	985.21			16.6818	11.9756	12.4504	13.0681	21.2153	21.056		1.14311			0.507454	0.375244	0.373338	0.838949	0.573536		0.35311	0.169265	0.276449	0.714506	0.423251
964.063		980.626	978.213	975.429	978.627	983.303	985.4			16.5633	14.1498	11.3661	14.5642	19.2398	21.3366		1.12808			0.497224	0.437541	0.336343	0.922703	0.513292		0.339675	0.252101	0.233734	0.862976	0.341776
963.929		981.045	978.673	977.654	977.918	982.46	985.124			17.1158	14.744	13.7248	13.9889	18.5311	21.1951		1.13562			0.51724	0.458958	0.408851	0.892171	0.497685		0.365963	0.280579	0.317453	0.808852	0.32067
964.097		982.06	977.591	976.895	977.83	984.298	985.281			17.963	13.4942	12.7984	13.7335	20.2011	21.1842		1.1362			0.543121	0.42027	0.381451	0.876332	0.542814		0.399954	0.229135	0.285816	0.780775	0.381703
963.982		981.741	977.27	976.415	979.78	984.166	984.693			17.7586	13.2876	12.4329	15.7983	20.1838	20.7106		1.16218			0.549219	0.423298	0.37903	1.03114	0.554751		0.407962	0.233162	0.283022	1.0552	0.397846
963.586		982.345	976.592	978.46	978.133	984.385	984.612			18.7593	13.0057	14.8743	14.5466	20.7991	21.0265		1.14472			0.571452	0.408094	0.446647	0.935178	0.563075		0.437163	0.212945	0.361093	0.885091	0.409103
964.08		980.89	976.317	977.13	978.848	983.723	984.633			16.8104	12.2365	13.0497	14.7681	19.6428	20.553		1.17109			0.52388	0.392802	0.400884	0.971287	0.54402		0.374683	0.192611	0.308254	0.949101	0.383334
963.599		980.654	977.773	976.577	978.933	984.647	984.333			17.0552	14.1746	12.9777	15.3339	21.0479	20.7342		1.16085			0.526863	0.45104	0.395188	0.999685	0.577841		0.378602	0.27005	0.301677	0.999442	0.429073
963.302		980.963	974.465	977.111	977.794	984.961	985.128			17.6605	11.1633	13.8085	14.4919	21.6587	21.8255		1.10281			0.518286	0.337461	0.399465	0.897557	0.564881		0.367337	0.119024	0.306615	0.8184	0.411546
963.172		982.001	977.103	979.411	978.673	984.272	984.848			18.8288	13.931	16.2394	15.5016	21.1	21.6765		1.1104			0.55637	0.42402	0.473016	0.966689	0.554092		0.417354	0.234121	0.391538	0.94095	0.396955
963.094		981.003	976.824	978.391	975.991	984.903	984.372			17.909	13.7309	15.2979	12.8971	21.8089	21.2787		1.13115			0.539083	0.425742	0.453922	0.819306	0.583414		0.394651	0.236411	0.369492	0.679685	0.43661
963.366		982.405	975.501	977.539	977.306	985.031	984.735			19.0396	12.1358	14.1737	13.9402	21.6649	21.3697		1.12633			0.570674	0.374681	0.418772	0.881797	0.577092		0.43614	0.168515	0.328908	0.790462	0.42806
962.923		982.663	977.135	977.016	976.42	985.475	985.016			19.7391	14.2116	14.0928	13.4969	22.5514	22.093		1.08946			0.572273	0.424407	0.402752	0.825809	0.581043		0.438241	0.234636	0.310411	0.691214	0.433403
963.115		981.184	977.973	978.942	976.99	984.718	984.721			18.0692	14.858	15.8267	13.8747	21.603	21.6064		1.114			0.535657	0.453703	0.462491	0.868042	0.569141		0.390151	0.27359	0.379386	0.76608	0.417308

[truncated: 4 more sheets: LZ-4pm2, LZ-4pm3, LZ-4pd1, LZ-4pd2]
