# Supplementary material for: Polo-like kinase-dependent phosphorylation of the synaptonemal complex protein SYP-4 regulates double-strand break formation through a negative feedback loop
Source: eLife. 2017 Mar 27;6:e23437. doi: 10.7554/eLife.23437 (PMC5423773; doi:10.7554/eLife.23437)
Supplement: Supplementary file 3. — DOI: http://dx.doi.org/10.7554/eLife.23437.027 [file elife-23437-supp3.xlsx]

## Sheet: Sheet1
		Brood Size				Embryonic lethality (emb)				High incidence of male (HIM)
														genotype	Brood size	% emb	% HIM
	wild tyype	syp-4(S269A)	syp-4(S269D)		wild tyype	syp-4(S269A)	syp-4(S269D)		wild tyype	syp-4(S269A)	syp-4(S269D)			WT	261	0	0
														syp-4(S269A)	168	6.4	0.3
	282	210	197		0	3	0		0	0	0			syp-4(S269D)	207	7.9	1
	247	167	212		0	0	3		0	0	1
	283	124	175		0	2	2		0	0	0
	296	128	172		0	0	1		0	1	0
	259	184	190		0	1	0		0	0	0
	289	175	230		0	0	1		0	0	0
	275	176	265		0	0	5		0	0	0
	197	201	241		0	0	0		0	0	1
	295	122	173		0	0	0		0	0	0
	219	167	224		0	0	2		0	0	0
	268	192	195		0	2	0		0	0	0
	245	139	190		0	0	1		0	0	0
	229	175	177		0	1	0		0	0	0
	249	173	243		0	0	1		0	0	0
	278	174	224		0	2	0		0	0	0
Average of total no. of eggs laid	260.733	167.133	207.2
SD	29.4072	27.2446	29.3676
